# Supplementary material for: Metagenomic insights into mechanisms of coral larval settlement induction and inhibition by marine biofilms
Source: Research Square preprint supplement (doi:10.21203/rs.3.rs-8208358/v1), 2026-01-23
Supplement: Supplementary file 3 [file 99e91869f21fc33758402002.xlsx]

## Sheet: Table captions
Table	Caption
S1	Sample grouping for metagenome extractions
S2	Sequence data and QC for each metagenome sample
S3	Assembly statistics for each metagenome sample
S4	Bining QC for each bin before dereplication. Columns 0-5+ indicates how many times each marker gene was found. The final column indicates which was MAG was selected as the representative MAG after dereplication at 95% ANI
S5	Taxonomy and QC for final MAGs
S6	Copy numbers for each gene of interest in each MAG
S7	Multivariate linear model results for genes encoding mechanisms idenfied as potentially settlement inducing or inhibiting. Where model test is a treatment, the value indicates the test compared to Light 2M. FDR ≤ 0.25 is used to indicate a significant association

## Sheet: S1
Sample ID	Species	Treatment	Tank	Settlement category	Percent settled	Average percent settled
SE2451	P . sinensis	Light 2M	Tank 1	None	0
SE2451	P . sinensis	Light 2M	Tank 1	None	0	0
SE2452	P . sinensis	Light 2M	Tank 1	Low	33.3333
SE2452	P . sinensis	Light 2M	Tank 1	Low	33.3333	33.3333
SE2452	P . sinensis	Light 2M	Tank 1	Low	33.3333
SE2453	P . sinensis	Light 2M	Tank 1	Low	33.3333
SE2453	P . sinensis	Light 2M	Tank 1	Low	33.3333	28.8889
SE2453	P . sinensis	Light 2M	Tank 1	Low	20
SE2454	P . sinensis	Light 2M	Tank 1	Low	16.6667
SE2454	P . sinensis	Light 2M	Tank 1	Low	16.6667	16.6667
SE2454	P . sinensis	Light 2M	Tank 1	Low	16.6667
SE2455	P . sinensis	Light 2M	Tank 1	High	66.6667
SE2455	P . sinensis	Light 2M	Tank 1	High	66.6667	66.6667
SE2455	P . sinensis	Light 2M	Tank 1	High	66.6667
SE2456	P . sinensis	Light 2M	Tank 1	High	66.6667
SE2456	P . sinensis	Light 2M	Tank 1	High	83.3333	77.7778
SE2456	P . sinensis	Light 2M	Tank 1	High	83.3333
SE2457	P . sinensis	Light 2M	Tank 1	High	83.3333
SE2457	P . sinensis	Light 2M	Tank 1	High	100	94.4444
SE2457	P . sinensis	Light 2M	Tank 1	High	100
SE2458	P . sinensis	Light 2M	Tank 2	None	0
SE2458	P . sinensis	Light 2M	Tank 2	None	0	0
SE2459	P . sinensis	Light 2M	Tank 2	Low	16.6667
SE2459	P . sinensis	Light 2M	Tank 2	Low	33.3333	27.7778
SE2459	P . sinensis	Light 2M	Tank 2	Low	33.3333
SE2460	P . sinensis	Light 2M	Tank 2	Low	50
SE2460	P . sinensis	Light 2M	Tank 2	Low	50	46.6667
SE2460	P . sinensis	Light 2M	Tank 2	Low	40
SE2461	P . sinensis	Light 2M	Tank 2	High	83.3333
SE2461	P . sinensis	Light 2M	Tank 2	High	83.3333	83.3333
SE2461	P . sinensis	Light 2M	Tank 2	High	83.3333
SE2462	P . sinensis	Light 2M	Tank 2	High	83.3333
SE2462	P . sinensis	Light 2M	Tank 2	High	83.3333	84.127
SE2462	P . sinensis	Light 2M	Tank 2	High	85.7143
SE2463	P . sinensis	Light 2M	Tank 2	High	100
SE2463	P . sinensis	Light 2M	Tank 2	High	100	100
SE2463	P . sinensis	Light 2M	Tank 2	High	100
SE2464	P . sinensis	Light 2M	Tank 3	Low	33.3333
SE2464	P . sinensis	Light 2M	Tank 3	Low	33.3333	33.3333
SE2464	P . sinensis	Light 2M	Tank 3	Low	33.3333
SE2465	P . sinensis	Light 2M	Tank 3	Low	50
SE2465	P . sinensis	Light 2M	Tank 3	Low	50	50
SE2465	P . sinensis	Light 2M	Tank 3	Low	50
SE2466	P . sinensis	Light 2M	Tank 3	High	100
SE2466	P . sinensis	Light 2M	Tank 3	High	100	100
SE2466	P . sinensis	Light 2M	Tank 3	High	100
SE2467	P . sinensis	Light 2M	Tank 3	High	100
SE2467	P . sinensis	Light 2M	Tank 3	High	100	100
SE2467	P . sinensis	Light 2M	Tank 3	High	100
SE2468	P . sinensis	Light 2M	Tank 3	High	100
SE2468	P . sinensis	Light 2M	Tank 3	High	100	100
SE2468	P . sinensis	Light 2M	Tank 3	High	100
SE2471	D. favus	Light 2M	Tank 1	None	0	0
SE2472	D. favus	Light 2M	Tank 1	Low	16.6667
SE2472	D. favus	Light 2M	Tank 1	Low	28.5714	26.1905
SE2472	D. favus	Light 2M	Tank 1	Low	33.3333
SE2473	D. favus	Light 2M	Tank 1	Low	33.3333
SE2473	D. favus	Light 2M	Tank 1	Low	33.3333	33.3333
SE2473	D. favus	Light 2M	Tank 1	Low	33.3333
SE2474	D. favus	Light 2M	Tank 1	Low	40
SE2474	D. favus	Light 2M	Tank 1	Low	50	46.6667
SE2474	D. favus	Light 2M	Tank 1	Low	50
SE2475	D. favus	Light 2M	Tank 1	High	83.3333
SE2475	D. favus	Light 2M	Tank 1	High	83.3333	84.127
SE2475	D. favus	Light 2M	Tank 1	High	85.7143
SE2476	D. favus	Light 2M	Tank 1	High	100
SE2476	D. favus	Light 2M	Tank 1	High	100	100
SE2476	D. favus	Light 2M	Tank 1	High	100
SE2477	D. favus	Light 2M	Tank 1	High	100
SE2477	D. favus	Light 2M	Tank 1	High	100	100
SE2477	D. favus	Light 2M	Tank 1	High	100
SE2478	D. favus	Light 2M	Tank 2	None	0	0
SE2479	D. favus	Light 2M	Tank 2	Low	16.6667
SE2479	D. favus	Light 2M	Tank 2	Low	16.6667	22.2222
SE2479	D. favus	Light 2M	Tank 2	Low	33.3333
SE2480	D. favus	Light 2M	Tank 2	Low	33.3333
SE2480	D. favus	Light 2M	Tank 2	Low	33.3333	33.3333
SE2480	D. favus	Light 2M	Tank 2	Low	33.3333
SE2481	D. favus	Light 2M	Tank 2	Low	33.3333
SE2481	D. favus	Light 2M	Tank 2	Low	42.8571	42.0635
SE2481	D. favus	Light 2M	Tank 2	Low	50
SE2482	D. favus	Light 2M	Tank 2	High	66.6667
SE2482	D. favus	Light 2M	Tank 2	High	71.4286	72.6984
SE2482	D. favus	Light 2M	Tank 2	High	80
SE2483	D. favus	Light 2M	Tank 2	High	80
SE2483	D. favus	Light 2M	Tank 2	High	83.3333	82.2222
SE2483	D. favus	Light 2M	Tank 2	High	83.3333
SE2484	D. favus	Light 2M	Tank 2	High	83.3333
SE2484	D. favus	Light 2M	Tank 2	High	83.3333	88.8889
SE2484	D. favus	Light 2M	Tank 2	High	100
SE2485	D. favus	Light 2M	Tank 3	None	0	0
SE2486	D. favus	Light 2M	Tank 3	Low	33.3333
SE2486	D. favus	Light 2M	Tank 3	Low	33.3333	33.3333
SE2486	D. favus	Light 2M	Tank 3	Low	33.3333
SE2487	D. favus	Light 2M	Tank 3	Low	33.3333
SE2487	D. favus	Light 2M	Tank 3	Low	40	38.7302
SE2487	D. favus	Light 2M	Tank 3	Low	42.8571
SE2488	D. favus	Light 2M	Tank 3	Low	50
SE2488	D. favus	Light 2M	Tank 3	Low	50	50
SE2488	D. favus	Light 2M	Tank 3	Low	50
SE2489	D. favus	Light 2M	Tank 3	High	66.6667
SE2489	D. favus	Light 2M	Tank 3	High	66.6667	71.1111
SE2489	D. favus	Light 2M	Tank 3	High	80
SE2490	D. favus	Light 2M	Tank 3	High	80
SE2490	D. favus	Light 2M	Tank 3	High	80	81.1111
SE2490	D. favus	Light 2M	Tank 3	High	83.3333
SE2491	D. favus	Light 2M	Tank 3	High	83.3333
SE2491	D. favus	Light 2M	Tank 3	High	85.7143	89.6825
SE2491	D. favus	Light 2M	Tank 3	High	100
SE2536	E. aspera	Light 2M	Tank 1	None	0
SE2536	E. aspera	Light 2M	Tank 1	None	0	0
SE2537	E. aspera	Light 2M	Tank 1	Low	16.6667
SE2537	E. aspera	Light 2M	Tank 1	Low	16.6667	16.6667
SE2537	E. aspera	Light 2M	Tank 1	Low	16.6667
SE2538	E. aspera	Light 2M	Tank 1	Low	16.6667
SE2538	E. aspera	Light 2M	Tank 1	Low	33.3333	27.7778
SE2538	E. aspera	Light 2M	Tank 1	Low	33.3333
SE2539	E. aspera	Light 2M	Tank 1	Low	33.3333
SE2539	E. aspera	Light 2M	Tank 1	Low	50	44.4444
SE2539	E. aspera	Light 2M	Tank 1	Low	50
SE2540	E. aspera	Light 2M	Tank 1	High	83.3333
SE2540	E. aspera	Light 2M	Tank 1	High	83.3333	83.3333
SE2540	E. aspera	Light 2M	Tank 1	High	83.3333
SE2541	E. aspera	Light 2M	Tank 1	High	83.3333
SE2541	E. aspera	Light 2M	Tank 1	High	83.3333	83.3333
SE2541	E. aspera	Light 2M	Tank 1	High	83.3333
SE2542	E. aspera	Light 2M	Tank 1	High	83.3333
SE2542	E. aspera	Light 2M	Tank 1	High	100	94.4444
SE2542	E. aspera	Light 2M	Tank 1	High	100
SE2543	E. aspera	Light 2M	Tank 2	None	0
SE2543	E. aspera	Light 2M	Tank 2	None	0	0
SE2543	E. aspera	Light 2M	Tank 2	None	0
SE2544	E. aspera	Light 2M	Tank 2	Low	16.6667
SE2544	E. aspera	Light 2M	Tank 2	Low	16.6667	16.6667
SE2544	E. aspera	Light 2M	Tank 2	Low	16.6667
SE2545	E. aspera	Light 2M	Tank 2	Low	16.6667
SE2545	E. aspera	Light 2M	Tank 2	Low	16.6667	16.6667
SE2545	E. aspera	Light 2M	Tank 2	Low	16.6667
SE2546	E. aspera	Light 2M	Tank 2	Low	20
SE2546	E. aspera	Light 2M	Tank 2	Low	33.3333	28.8889
SE2546	E. aspera	Light 2M	Tank 2	Low	33.3333
SE2547	E. aspera	Light 2M	Tank 2	High	66.6667
SE2547	E. aspera	Light 2M	Tank 2	High	75	75
SE2547	E. aspera	Light 2M	Tank 2	High	83.3333
SE2548	E. aspera	Light 2M	Tank 2	High	83.3333
SE2548	E. aspera	Light 2M	Tank 2	High	100	91.6667
SE2549	E. aspera	Light 2M	Tank 3	Low	16.6667
SE2549	E. aspera	Light 2M	Tank 3	Low	33.3333	27.7778
SE2549	E. aspera	Light 2M	Tank 3	Low	33.3333
SE2550	E. aspera	Light 2M	Tank 3	Low	33.3333
SE2550	E. aspera	Light 2M	Tank 3	Low	50	44.4444
SE2550	E. aspera	Light 2M	Tank 3	Low	50
SE2551	E. aspera	Light 2M	Tank 3	Low	50
SE2551	E. aspera	Light 2M	Tank 3	Low	50	50
SE2551	E. aspera	Light 2M	Tank 3	Low	50
SE2552	E. aspera	Light 2M	Tank 3	High	83.3333
SE2552	E. aspera	Light 2M	Tank 3	High	100	94.4444
SE2552	E. aspera	Light 2M	Tank 3	High	100
SE2553	E. aspera	Light 2M	Tank 3	High	100
SE2553	E. aspera	Light 2M	Tank 3	High	100	100
SE2553	E. aspera	Light 2M	Tank 3	High	100
SE2554	E. aspera	Light 2M	Tank 3	High	100
SE2554	E. aspera	Light 2M	Tank 3	High	100	100
SE2554	E. aspera	Light 2M	Tank 3	High	100
SE2494	P. lobata	Light 2M	Tank 1	None	0
SE2494	P. lobata	Light 2M	Tank 1	None	0	0
SE2494	P. lobata	Light 2M	Tank 1	None	0
SE2495	P. lobata	Light 2M	Tank 1	None	0
SE2495	P. lobata	Light 2M	Tank 1	None	0	0
SE2495	P. lobata	Light 2M	Tank 1	None	0
SE2496	P. lobata	Light 2M	Tank 1	None	0
SE2496	P. lobata	Light 2M	Tank 1	None	0	0
SE2496	P. lobata	Light 2M	Tank 1	None	0
SE2497	P. lobata	Light 2M	Tank 1	Low	16.6667
SE2497	P. lobata	Light 2M	Tank 1	Low	16.6667	16.6667
SE2497	P. lobata	Light 2M	Tank 1	Low	16.6667
SE2498	P. lobata	Light 2M	Tank 1	Low	16.6667
SE2498	P. lobata	Light 2M	Tank 1	Low	20	18.8889
SE2498	P. lobata	Light 2M	Tank 1	Low	20
SE2499	P. lobata	Light 2M	Tank 1	Low	25
SE2499	P. lobata	Light 2M	Tank 1	Low	33.3333	36.1111
SE2499	P. lobata	Light 2M	Tank 1	Low	50
SE2500	P. lobata	Light 2M	Tank 1	High	66.6667
SE2500	P. lobata	Light 2M	Tank 1	High	66.6667	66.6667
SE2501	P. lobata	Light 2M	Tank 2	None	0
SE2501	P. lobata	Light 2M	Tank 2	None	0	0
SE2501	P. lobata	Light 2M	Tank 2	None	0
SE2502	P. lobata	Light 2M	Tank 2	None	0
SE2502	P. lobata	Light 2M	Tank 2	None	0	0
SE2502	P. lobata	Light 2M	Tank 2	None	0
SE2503	P. lobata	Light 2M	Tank 2	None	0
SE2503	P. lobata	Light 2M	Tank 2	None	0	0
SE2503	P. lobata	Light 2M	Tank 2	None	0
SE2504	P. lobata	Light 2M	Tank 2	Low	16.6667
SE2504	P. lobata	Light 2M	Tank 2	Low	16.6667	16.6667
SE2504	P. lobata	Light 2M	Tank 2	Low	16.6667
SE2505	P. lobata	Light 2M	Tank 2	Low	16.6667
SE2505	P. lobata	Light 2M	Tank 2	Low	16.6667	16.6667
SE2505	P. lobata	Light 2M	Tank 2	Low	16.6667
SE2506	P. lobata	Light 2M	Tank 2	Low	20
SE2506	P. lobata	Light 2M	Tank 2	Low	20	20
SE2506	P. lobata	Light 2M	Tank 2	Low	20
SE2507	P. lobata	Light 2M	Tank 2	High	60	60
SE2508	P. lobata	Light 2M	Tank 3	None	0
SE2508	P. lobata	Light 2M	Tank 3	None	0	0
SE2509	P. lobata	Light 2M	Tank 3	Low	16.6667
SE2509	P. lobata	Light 2M	Tank 3	Low	16.6667	16.6667
SE2509	P. lobata	Light 2M	Tank 3	Low	16.6667
SE2510	P. lobata	Light 2M	Tank 3	Low	16.6667
SE2510	P. lobata	Light 2M	Tank 3	Low	20	23.3333
SE2510	P. lobata	Light 2M	Tank 3	Low	33.3333
SE2511	P. lobata	Light 2M	Tank 3	Low	33.3333
SE2511	P. lobata	Light 2M	Tank 3	Low	33.3333	33.3333
SE2511	P. lobata	Light 2M	Tank 3	Low	33.3333
SE2512	P. lobata	Light 2M	Tank 3	High	60
SE2512	P. lobata	Light 2M	Tank 3	High	66.6667	64.4444
SE2512	P. lobata	Light 2M	Tank 3	High	66.6667
SE2513	P. lobata	Light 2M	Tank 3	High	83.3333
SE2513	P. lobata	Light 2M	Tank 3	High	83.3333	83.3333
SE2513	P. lobata	Light 2M	Tank 3	High	83.3333
SE2514	P. lobata	Light 2M	Tank 3	High	83.3333
SE2514	P. lobata	Light 2M	Tank 3	High	100	94.4444
SE2514	P. lobata	Light 2M	Tank 3	High	100
SE6797	P . sinensis	Light 1M	Tank 1	None	0
SE6797	P . sinensis	Light 1M	Tank 1	None	0	0
SE6797	P . sinensis	Light 1M	Tank 1	None	0
SE6798	P . sinensis	Light 1M	Tank 1	None	0
SE6798	P . sinensis	Light 1M	Tank 1	None	0	0
SE6798	P . sinensis	Light 1M	Tank 1	None	0
SE6799	P . sinensis	Light 1M	Tank 1	None	0
SE6799	P . sinensis	Light 1M	Tank 1	None	0	0
SE6799	P . sinensis	Light 1M	Tank 1	None	0
SE6800	P . sinensis	Light 1M	Tank 1	Low	16.6667
SE6800	P . sinensis	Light 1M	Tank 1	Low	16.6667	16.6667
SE6800	P . sinensis	Light 1M	Tank 1	Low	16.6667
SE6801	P . sinensis	Light 1M	Tank 1	Low	28.5714
SE6801	P . sinensis	Light 1M	Tank 1	Low	33.3333	31.746
SE6801	P . sinensis	Light 1M	Tank 1	Low	33.3333
SE6802	P . sinensis	Light 1M	Tank 1	Low	33.3333
SE6802	P . sinensis	Light 1M	Tank 1	Low	42.8571	42.0635
SE6802	P . sinensis	Light 1M	Tank 1	Low	50
SE6803	P . sinensis	Light 1M	Tank 1	High	57.1429
SE6803	P . sinensis	Light 1M	Tank 1	High	66.6667	61.9048
SE6804	P . sinensis	Light 1M	Tank 2	None	0
SE6804	P . sinensis	Light 1M	Tank 2	None	0	0
SE6804	P . sinensis	Light 1M	Tank 2	None	0
SE6805	P . sinensis	Light 1M	Tank 2	None	0
SE6805	P . sinensis	Light 1M	Tank 2	None	0	0
SE6805	P . sinensis	Light 1M	Tank 2	None	0
SE6806	P . sinensis	Light 1M	Tank 2	None	0
SE6806	P . sinensis	Light 1M	Tank 2	None	0	0
SE6806	P . sinensis	Light 1M	Tank 2	None	0
SE6807	P . sinensis	Light 1M	Tank 2	Low	16.6667
SE6807	P . sinensis	Light 1M	Tank 2	Low	16.6667	16.6667
SE6807	P . sinensis	Light 1M	Tank 2	Low	16.6667
SE6808	P . sinensis	Light 1M	Tank 2	Low	16.6667
SE6808	P . sinensis	Light 1M	Tank 2	Low	16.6667	16.6667
SE6808	P . sinensis	Light 1M	Tank 2	Low	16.6667
SE6809	P . sinensis	Light 1M	Tank 2	Low	16.6667
SE6809	P . sinensis	Light 1M	Tank 2	Low	16.6667	17.7778
SE6809	P . sinensis	Light 1M	Tank 2	Low	20
SE6810	P . sinensis	Light 1M	Tank 2	High	66.6667	66.6667
SE6811	P . sinensis	Light 1M	Tank 3	None	0	0
SE6812	P . sinensis	Light 1M	Tank 3	Low	16.6667
SE6812	P . sinensis	Light 1M	Tank 3	Low	16.6667	16.6667
SE6812	P . sinensis	Light 1M	Tank 3	Low	16.6667
SE6813	P . sinensis	Light 1M	Tank 3	Low	16.6667
SE6813	P . sinensis	Light 1M	Tank 3	Low	16.6667	22.2222
SE6813	P . sinensis	Light 1M	Tank 3	Low	33.3333
SE6814	P . sinensis	Light 1M	Tank 3	Low	33.3333
SE6814	P . sinensis	Light 1M	Tank 3	Low	33.3333	38.8889
SE6814	P . sinensis	Light 1M	Tank 3	Low	50
SE6815	P . sinensis	Light 1M	Tank 3	High	66.6667
SE6815	P . sinensis	Light 1M	Tank 3	High	66.6667	66.6667
SE6815	P . sinensis	Light 1M	Tank 3	High	66.6667
SE6816	P . sinensis	Light 1M	Tank 3	High	66.6667
SE6816	P . sinensis	Light 1M	Tank 3	High	66.6667	66.6667
SE6816	P . sinensis	Light 1M	Tank 3	High	66.6667
SE6817	P . sinensis	Light 1M	Tank 3	High	83.3333
SE6817	P . sinensis	Light 1M	Tank 3	High	85.7143	89.6825
SE6817	P . sinensis	Light 1M	Tank 3	High	100
SE6768	D. favus	Light 1M	Tank 1	None	0
SE6768	D. favus	Light 1M	Tank 1	None	0	0
SE6768	D. favus	Light 1M	Tank 1	None	0
SE6769	D. favus	Light 1M	Tank 1	None	0
SE6769	D. favus	Light 1M	Tank 1	None	0	0
SE6769	D. favus	Light 1M	Tank 1	None	0
SE6770	D. favus	Light 1M	Tank 1	None	0
SE6770	D. favus	Light 1M	Tank 1	None	0	0
SE6770	D. favus	Light 1M	Tank 1	None	0
SE6771	D. favus	Light 1M	Tank 1	Low	16.6667
SE6771	D. favus	Light 1M	Tank 1	Low	16.6667	16.6667
SE6771	D. favus	Light 1M	Tank 1	Low	16.6667
SE6772	D. favus	Light 1M	Tank 1	Low	16.6667
SE6772	D. favus	Light 1M	Tank 1	Low	33.3333	33.3333
SE6772	D. favus	Light 1M	Tank 1	Low	50
SE6773	D. favus	Light 1M	Tank 2	None	0
SE6773	D. favus	Light 1M	Tank 2	None	0	0
SE6773	D. favus	Light 1M	Tank 2	None	0
SE6774	D. favus	Light 1M	Tank 2	None	0
SE6774	D. favus	Light 1M	Tank 2	None	0	0
SE6774	D. favus	Light 1M	Tank 2	None	0
SE6775	D. favus	Light 1M	Tank 2	None	0
SE6775	D. favus	Light 1M	Tank 2	None	0	0
SE6775	D. favus	Light 1M	Tank 2	None	0
SE6776	D. favus	Light 1M	Tank 2	Low	14.2857
SE6776	D. favus	Light 1M	Tank 2	Low	16.6667	15.873
SE6776	D. favus	Light 1M	Tank 2	Low	16.6667
SE6777	D. favus	Light 1M	Tank 2	Low	16.6667
SE6777	D. favus	Light 1M	Tank 2	Low	16.6667	17.7778
SE6777	D. favus	Light 1M	Tank 2	Low	20
SE6778	D. favus	Light 1M	Tank 3	None	0
SE6778	D. favus	Light 1M	Tank 3	None	0	0
SE6778	D. favus	Light 1M	Tank 3	None	0
SE6779	D. favus	Light 1M	Tank 3	None	0
SE6779	D. favus	Light 1M	Tank 3	None	0	0
SE6779	D. favus	Light 1M	Tank 3	None	0
SE6780	D. favus	Light 1M	Tank 3	None	0
SE6780	D. favus	Light 1M	Tank 3	None	0	0
SE6780	D. favus	Light 1M	Tank 3	None	0
SE6781	D. favus	Light 1M	Tank 3	Low	16.6667
SE6781	D. favus	Light 1M	Tank 3	Low	16.6667	16.6667
SE6781	D. favus	Light 1M	Tank 3	Low	16.6667
SE6782	D. favus	Light 1M	Tank 3	Low	16.6667
SE6782	D. favus	Light 1M	Tank 3	Low	16.6667	16.6667
SE6782	D. favus	Light 1M	Tank 3	Low	16.6667
SE6783	D. favus	Light 1M	Tank 3	Low	16.6667
SE6783	D. favus	Light 1M	Tank 3	Low	16.6667	16.6667
SE6783	D. favus	Light 1M	Tank 3	Low	16.6667
SE6784	D. favus	Light 1M	Tank 3	High	66.6667
SE6784	D. favus	Light 1M	Tank 3	High	66.6667	66.6667
SE6832	E. aspera	Light 1M	Tank 1	None	0
SE6832	E. aspera	Light 1M	Tank 1	None	0	0
SE6832	E. aspera	Light 1M	Tank 1	None	0
SE6833	E. aspera	Light 1M	Tank 1	None	0
SE6833	E. aspera	Light 1M	Tank 1	None	0	0
SE6833	E. aspera	Light 1M	Tank 1	None	0
SE6834	E. aspera	Light 1M	Tank 1	Low	20
SE6834	E. aspera	Light 1M	Tank 1	Low	25	29.58
SE6834	E. aspera	Light 1M	Tank 1	Low	33.3333
SE6834	E. aspera	Light 1M	Tank 1	Low	40
SE6835	E. aspera	Light 1M	Tank 2	None	0
SE6835	E. aspera	Light 1M	Tank 2	None	0	0
SE6835	E. aspera	Light 1M	Tank 2	None	0
SE6836	E. aspera	Light 1M	Tank 2	None	0
SE6836	E. aspera	Light 1M	Tank 2	None	0	0
SE6836	E. aspera	Light 1M	Tank 2	None	0
SE6837	E. aspera	Light 1M	Tank 2	Low	16.6667
SE6837	E. aspera	Light 1M	Tank 2	Low	16.6667	16.6667
SE6837	E. aspera	Light 1M	Tank 2	Low	16.6667
SE6838	E. aspera	Light 1M	Tank 2	Low	16.6667
SE6838	E. aspera	Light 1M	Tank 2	Low	20	18.8889
SE6838	E. aspera	Light 1M	Tank 2	Low	20
SE6839	E. aspera	Light 1M	Tank 2	Low	33.3333
SE6839	E. aspera	Light 1M	Tank 2	Low	33.3333	38.8889
SE6839	E. aspera	Light 1M	Tank 2	Low	50
SE6840	E. aspera	Light 1M	Tank 2	High	57.1429	57.1429
SE6841	E. aspera	Light 1M	Tank 3	None	0
SE6841	E. aspera	Light 1M	Tank 3	None	0	0
SE6841	E. aspera	Light 1M	Tank 3	None	0
SE6842	E. aspera	Light 1M	Tank 3	None	0
SE6842	E. aspera	Light 1M	Tank 3	None	0	0
SE6842	E. aspera	Light 1M	Tank 3	None	0
SE6843	E. aspera	Light 1M	Tank 3	None	0
SE6843	E. aspera	Light 1M	Tank 3	None	0	0
SE6843	E. aspera	Light 1M	Tank 3	None	0
SE6844	E. aspera	Light 1M	Tank 3	Low	16.6667
SE6844	E. aspera	Light 1M	Tank 3	Low	16.6667	16.6667
SE6844	E. aspera	Light 1M	Tank 3	Low	16.6667
SE6845	E. aspera	Light 1M	Tank 3	Low	16.6667
SE6845	E. aspera	Light 1M	Tank 3	Low	16.6667	16.6667
SE6845	E. aspera	Light 1M	Tank 3	Low	16.6667
SE6846	E. aspera	Light 1M	Tank 3	Low	16.6667
SE6846	E. aspera	Light 1M	Tank 3	Low	20	21.746
SE6846	E. aspera	Light 1M	Tank 3	Low	28.5714
SE6847	E. aspera	Light 1M	Tank 3	High	66.6667
SE6847	E. aspera	Light 1M	Tank 3	High	66.6667	83.3333
SE6847	E. aspera	Light 1M	Tank 3	High	100
SE6847	E. aspera	Light 1M	Tank 3	High	100
SE6787	P. lobata	Light 1M	Tank 1	None	0
SE6787	P. lobata	Light 1M	Tank 1	None	0	0
SE6787	P. lobata	Light 1M	Tank 1	None	0
SE6788	P. lobata	Light 1M	Tank 1	None	0
SE6788	P. lobata	Light 1M	Tank 1	None	0	0
SE6788	P. lobata	Light 1M	Tank 1	None	0
SE6789	P. lobata	Light 1M	Tank 1	None	0
SE6789	P. lobata	Light 1M	Tank 1	None	0	0
SE6789	P. lobata	Light 1M	Tank 1	None	0
SE6790	P. lobata	Light 1M	Tank 1	Low	16.6667
SE6790	P. lobata	Light 1M	Tank 1	Low	16.6667	17.7778
SE6790	P. lobata	Light 1M	Tank 1	Low	20
SE6791	P. lobata	Light 1M	Tank 1	Low	25
SE6791	P. lobata	Light 1M	Tank 1	Low	28.5714	28.9683
SE6791	P. lobata	Light 1M	Tank 1	Low	33.3333
SE6792	P. lobata	Light 1M	Tank 1	Low	33.3333
SE6792	P. lobata	Light 1M	Tank 1	Low	33.3333	38.8889
SE6792	P. lobata	Light 1M	Tank 1	Low	50
SE6793	P. lobata	Light 1M	Tank 2	None	0
SE6793	P. lobata	Light 1M	Tank 2	None	0	0
SE6793	P. lobata	Light 1M	Tank 2	None	0
SE6794	P. lobata	Light 1M	Tank 2	None	0
SE6794	P. lobata	Light 1M	Tank 2	None	0	0
SE6794	P. lobata	Light 1M	Tank 2	None	0
SE6795	P. lobata	Light 1M	Tank 2	None	0
SE6795	P. lobata	Light 1M	Tank 2	None	0	0
SE6795	P. lobata	Light 1M	Tank 2	None	0
SE6796	P. lobata	Light 1M	Tank 2	Low	16.6667
SE6796	P. lobata	Light 1M	Tank 2	Low	16.6667	17.7778
SE6796	P. lobata	Light 1M	Tank 2	Low	20
SE6820	P. lobata	Light 1M	Tank 2	Low	20
SE6820	P. lobata	Light 1M	Tank 2	Low	20	21.6667
SE6820	P. lobata	Light 1M	Tank 2	Low	25
SE6821	P. lobata	Light 1M	Tank 2	Low	25
SE6821	P. lobata	Light 1M	Tank 2	Low	33.3333	30.5556
SE6821	P. lobata	Light 1M	Tank 2	Low	33.3333
SE6822	P. lobata	Light 1M	Tank 2	High	60
SE6822	P. lobata	Light 1M	Tank 2	High	100	80
SE6823	P. lobata	Light 1M	Tank 3	None	0
SE6823	P. lobata	Light 1M	Tank 3	None	0	0
SE6823	P. lobata	Light 1M	Tank 3	None	0
SE6824	P. lobata	Light 1M	Tank 3	None	0
SE6824	P. lobata	Light 1M	Tank 3	None	0	0
SE6824	P. lobata	Light 1M	Tank 3	None	0
SE6825	P. lobata	Light 1M	Tank 3	None	0
SE6825	P. lobata	Light 1M	Tank 3	None	0	0
SE6826	P. lobata	Light 1M	Tank 3	Low	16.6667
SE6826	P. lobata	Light 1M	Tank 3	Low	16.6667	16.6667
SE6826	P. lobata	Light 1M	Tank 3	Low	16.6667
SE6827	P. lobata	Light 1M	Tank 3	Low	16.6667
SE6827	P. lobata	Light 1M	Tank 3	Low	16.6667	16.6667
SE6827	P. lobata	Light 1M	Tank 3	Low	16.6667
SE6828	P. lobata	Light 1M	Tank 3	Low	16.6667
SE6828	P. lobata	Light 1M	Tank 3	Low	20	18.8889
SE6828	P. lobata	Light 1M	Tank 3	Low	20
SE6829	P. lobata	Light 1M	Tank 3	High	60
SE6829	P. lobata	Light 1M	Tank 3	High	80	74.4444
SE6829	P. lobata	Light 1M	Tank 3	High	83.3333
SE6848	E. aspera	Dark 2M	Tank 1	None	0
SE6848	E. aspera	Dark 2M	Tank 1	None	0	0
SE6848	E. aspera	Dark 2M	Tank 1	None	0
SE6849	E. aspera	Dark 2M	Tank 1	None	0
SE6849	E. aspera	Dark 2M	Tank 1	None	0	0
SE6849	E. aspera	Dark 2M	Tank 1	None	0
SE6850	E. aspera	Dark 2M	Tank 1	None	0
SE6850	E. aspera	Dark 2M	Tank 1	None	0	0
SE6850	E. aspera	Dark 2M	Tank 1	None	0
SE6851	E. aspera	Dark 2M	Tank 1	Low	16.6667
SE6851	E. aspera	Dark 2M	Tank 1	Low	16.6667	16.6667
SE6851	E. aspera	Dark 2M	Tank 1	Low	16.6667
SE6852	E. aspera	Dark 2M	Tank 1	Low	16.6667
SE6852	E. aspera	Dark 2M	Tank 1	Low	33.3333	27.7778
SE6852	E. aspera	Dark 2M	Tank 1	Low	33.3333
SE6853	E. aspera	Dark 2M	Tank 1	High	66.6667	66.6667
SE6854	E. aspera	Dark 2M	Tank 2	None	0
SE6854	E. aspera	Dark 2M	Tank 2	None	0	0
SE6854	E. aspera	Dark 2M	Tank 2	None	0
SE6855	E. aspera	Dark 2M	Tank 2	None	0
SE6855	E. aspera	Dark 2M	Tank 2	None	0	0
SE6855	E. aspera	Dark 2M	Tank 2	None	0
SE6856	E. aspera	Dark 2M	Tank 2	None	0
SE6856	E. aspera	Dark 2M	Tank 2	None	0	0
SE6856	E. aspera	Dark 2M	Tank 2	None	0
SE6857	E. aspera	Dark 2M	Tank 2	Low	16.6667
SE6857	E. aspera	Dark 2M	Tank 2	Low	16.6667	16.6667
SE6857	E. aspera	Dark 2M	Tank 2	Low	16.6667
SE6858	E. aspera	Dark 2M	Tank 2	Low	33.3333
SE6858	E. aspera	Dark 2M	Tank 2	Low	33.3333	38.8889
SE6858	E. aspera	Dark 2M	Tank 2	Low	50
SE6859	E. aspera	Dark 2M	Tank 2	High	66.6667
SE6859	E. aspera	Dark 2M	Tank 2	High	66.6667	66.6667
SE6859	E. aspera	Dark 2M	Tank 2	High	66.6667
SE6860	E. aspera	Dark 2M	Tank 2	High	83.3333
SE6860	E. aspera	Dark 2M	Tank 2	High	85.7143	84.5238
SE6861	E. aspera	Dark 2M	Tank 3	None	0
SE6861	E. aspera	Dark 2M	Tank 3	None	0	0
SE6861	E. aspera	Dark 2M	Tank 3	None	0
SE6862	E. aspera	Dark 2M	Tank 3	None	0
SE6862	E. aspera	Dark 2M	Tank 3	None	0	0
SE6862	E. aspera	Dark 2M	Tank 3	None	0
SE6863	E. aspera	Dark 2M	Tank 3	None	0
SE6863	E. aspera	Dark 2M	Tank 3	None	0	0
SE6863	E. aspera	Dark 2M	Tank 3	None	0
SE6864	E. aspera	Dark 2M	Tank 3	Low	16.6667
SE6864	E. aspera	Dark 2M	Tank 3	Low	16.6667	16.6667
SE6864	E. aspera	Dark 2M	Tank 3	Low	16.6667
SE6865	E. aspera	Dark 2M	Tank 3	Low	16.6667
SE6865	E. aspera	Dark 2M	Tank 3	Low	16.6667	16.6667
SE6865	E. aspera	Dark 2M	Tank 3	Low	16.6667
SE6866	E. aspera	Dark 2M	Tank 3	Low	16.6667
SE6866	E. aspera	Dark 2M	Tank 3	Low	16.6667	16.6667
SE6866	E. aspera	Dark 2M	Tank 3	Low	16.6667
SE6867	E. aspera	Dark 2M	Tank 3	High	60
SE6867	E. aspera	Dark 2M	Tank 3	High	66.6667	63.3333

## Sheet: S2
Sample metadata						Sequence data
Sample ID	Coral	Treatment	Tank	Settlement (%)	Settlement category	Gbp sequenced	Mean read length (bp)	Mean read length after QC (bp)	Read length retained (%)	Total read count	Read count after QC	Read count retained (%)	SCM genes binned (%)	Reads mapped to bins (%)
SE2451	P. sinensis	Light 2M	Tank 1	0	None	18.33	137	122	89.0511	133374224	130449680	97.8073	41.8	46.8766
SE2452	P. sinensis	Light 2M	Tank 1	33.33	Low	15.28	146	131	89.726	104556202	102980792	98.4932	37.6	43.5052
SE2453	P. sinensis	Light 2M	Tank 1	28.89	Low	20.85	136	121	88.9706	153105144	150539116	98.324	36.2	39.7011
SE2454	P. sinensis	Light 2M	Tank 1	16.67	Low	56.21	132	117	88.6364	423863898	416152896	98.1808	41.6	43.9126
SE2455	P. sinensis	Light 2M	Tank 1	66.67	High	8.55	141	126	89.3617	60278210	59028720	97.9271	34.9	38.0781
SE2456	P. sinensis	Light 2M	Tank 1	77.78	High	4.88	135	119	88.1481	4876622	4464122	91.5413	37.4	27.1823
SE2457	P. sinensis	Light 2M	Tank 1	94.44	High	11	140	124	88.5714	78514010	76614798	97.5811	36.5	39.1757
SE2458	P. sinensis	Light 2M	Tank 2	0	None	7.25	146	131	89.726	49388246	48428322	98.0564	24.2	27.3105
SE2459	P. sinensis	Light 2M	Tank 2	27.78	Low	22.07	131	116	88.5496	167418584	164000122	97.9581	26.9	25.3506
SE2460	P. sinensis	Light 2M	Tank 2	46.67	Low	38.16	129	114	88.3721	295721082	289206010	97.7969	25.8	23.4062
SE2461	P. sinensis	Light 2M	Tank 2	83.33	High	7.42	134	119	88.806	55328694	53823432	97.2794	28.6	31.3661
SE2462	P. sinensis	Light 2M	Tank 2	84.13	High	2.31	144	129	89.5833	15955428	15554342	97.4862	24.3	22.0208
SE2463	P. sinensis	Light 2M	Tank 2	100	High	6.35	136	121	88.9706	46478770	45227108	97.307	30.7	26.5779
SE2464	P. sinensis	Light 2M	Tank 3	33.33	Low	23.85	140	124	88.5714	170375910	167495428	98.3093	36.6	35.3736
SE2465	P. sinensis	Light 2M	Tank 3	50	Low	11.24	127	112	88.189	88281896	85988482	97.4022	34.9	33.7506
SE2466	P. sinensis	Light 2M	Tank 3	100	High	0.01	113	97	85.8407	99668	95002	95.3185	40	6.35881	**removed due to poor sequencing
SE2467	P. sinensis	Light 2M	Tank 3	100	High	0.01	115	100	86.9565	91546	87040	95.0779	31.2	0	**removed due to poor sequencing
SE2468	P. sinensis	Light 2M	Tank 3	100	High	4.55	144	129	89.5833	31567404	30857498	97.7511	35.9	34.3292
SE2469	P. sinensis	Negative control	Negative control	0	None	0.02	116	100	86.2069	165140	156366	94.6869	29.7	6.51549	**removed due to poor sequencing
SE2471	D. favus	Light 2M	Tank 1	0	None	0.01	115	99	86.087	69578	65858	94.6535	7.1	0	**removed due to poor sequencing
SE2472	D. favus	Light 2M	Tank 1	26.19	Low	0.001	120	104	86.6667	13140	12496	95.0989	40	0	**removed due to poor sequencing
SE2473	D. favus	Light 2M	Tank 1	33.33	Low	24.47	143	128	89.5105	170314526	167206254	98.175	36.8	42.1448
SE2474	D. favus	Light 2M	Tank 1	46.67	Low	2.81	145	130	89.6552	19235356	18673036	97.0766	33.6	37.5794
SE2475	D. favus	Light 2M	Tank 1	84.13	High	7.76	145	130	89.6552	53218728	52070214	97.8419	33.4	38.1254
SE2476	D. favus	Light 2M	Tank 1	100	High	7.09	144	129	89.5833	49082672	48064030	97.9246	30.7	36.8398
SE2477	D. favus	Light 2M	Tank 2	100	High	9.95	143	128	89.5105	69474314	67410008	97.0287	33.8	36.4431
SE2478	D. favus	Light 2M	Tank 2	0	None	11.33	137	122	89.0511	82230912	80746906	98.1953	28.1	27.7559
SE2479	D. favus	Light 2M	Tank 2	22.22	Low	6.2	141	126	89.3617	43837960	42930676	97.9304	33.9	31.7895
SE2480	D. favus	Light 2M	Tank 2	33.33	Low	5.35	147	132	89.7959	36329776	35648274	98.1241	32.7	34.7866
SE2481	D. favus	Light 2M	Tank 2	42.06	Low	4.35	140	125	89.2857	30932454	30291790	97.9288	33.5	33.3677
SE2482	D. favus	Light 2M	Tank 2	72.7	High	5.19	137	122	89.0511	37775638	36715410	97.1934	32	31.4949
SE2483	D. favus	Light 2M	Tank 2	82.22	High	0.13	126	110	87.3016	1092892	1056254	96.6476	28	5.32324	**removed due to poor sequencing
SE2484	D. favus	Light 2M	Tank 3	88.89	High	8.55	142	126	88.7324	60226872	59692716	99.1131	30.9	29.2164
SE2485	D. favus	Light 2M	Tank 3	0	None	27.58	135	120	88.8889	203124404	199126026	98.0316	33.9	33.5714
SE2486	D. favus	Light 2M	Tank 3	33.33	Low	1.95	143	128	89.5105	13588808	13290240	97.8028	32.7	32.7498
SE2487	D. favus	Light 2M	Tank 3	38.73	Low	2.51	144	128	88.8889	17445620	17012898	97.5196	27.4	26.942
SE2488	D. favus	Light 2M	Tank 3	50	Low	3.12	141	126	89.3617	22106130	21609056	97.7514	27.3	24.4541
SE2489	D. favus	Light 2M	Tank 3	71.11	High	2.96	137	121	88.3212	21595978	20991024	97.1988	24.7	24.4027
SE2490	D. favus	Light 2M	Tank 3	81.11	High	14.32	144	129	89.5833	99095612	97392050	98.2809	31.1	31.5561
SE2491	D. favus	Light 2M	Tank 3	89.68	High	3.38	140	125	89.2857	23961606	23434950	97.8021	28	24.5855
SE2492	D. favus	Negative control	Negative control	0	None	8.98	113	98	86.7257	79427372	76326124	96.0955	50.3	29.2423
SE2494	P. lobata	Light 2M	Tank 1	0	None	0.62	139	123	88.4892	4430596	4136152	93.3543	33.1	25.4805
SE2495	P. lobata	Light 2M	Tank 1	0	None	1.2	140	124	88.5714	8582504	8145174	94.9044	33.2	27.982
SE2496	P. lobata	Light 2M	Tank 1	0	None	4.45	143	128	89.5105	31041548	29927814	96.4121	33	32.6518
SE2497	P. lobata	Light 2M	Tank 1	16.67	Low	3.68	145	129	88.9655	25403032	24526920	96.5512	31.1	32.9466
SE2498	P. lobata	Light 2M	Tank 1	18.89	Low	7.41	146	131	89.726	50646446	49318076	97.3772	33.3	37.4717
SE2499	P. lobata	Light 2M	Tank 1	36.11	Low	4.12	148	133	89.8649	27707300	26844114	96.8846	33.1	36.6965
SE2500	P. lobata	Light 2M	Tank 1	66.67	High	2.07	148	133	89.8649	13957974	13401926	96.0163	30.8	32.5468
SE2501	P. lobata	Light 2M	Tank 2	0	None	2.26	145	130	89.6552	15579448	15096306	96.8989	28.9	29.1816
SE2502	P. lobata	Light 2M	Tank 2	0	None	3.29	147	132	89.7959	22285106	21536310	96.6399	29.6	32.1467
SE2503	P. lobata	Light 2M	Tank 2	0	None	5.42	145	130	89.6552	37291340	36406350	97.6268	29.4	30.8401
SE2504	P. lobata	Light 2M	Tank 2	16.67	Low	2.13	145	130	89.6552	14665206	14154600	96.5182	28.2	26.761
SE2505	P. lobata	Light 2M	Tank 2	16.67	Low	4.82	147	132	89.7959	32759584	31931138	97.4711	30.9	34.3993
SE2506	P. lobata	Light 2M	Tank 2	20	Low	11.24	146	131	89.726	76847214	75212262	97.8725	30.6	34.7133
SE2507	P. lobata	Light 2M	Tank 2	60	High	4.92	145	130	89.6552	33784010	32918188	97.4372	28.1	30.3256
SE2508	P. lobata	Light 2M	Tank 3	0	None	4.3	140	125	89.2857	30492832	29200916	95.7632	31.9	31.6597
SE2509	P. lobata	Light 2M	Tank 3	16.67	Low	6.23	146	131	89.726	42469776	41703390	98.1955	31.3	36.8857
SE2510	P. lobata	Light 2M	Tank 3	23.33	Low	9.02	148	133	89.8649	60713482	59544528	98.0746	35.3	41.3574
SE2511	P. lobata	Light 2M	Tank 3	33.33	Low	6.97	148	133	89.8649	46891192	45750788	97.568	34.1	39.9712
SE2512	P. lobata	Light 2M	Tank 3	64.44	High	5.3	145	130	89.6552	36305830	35486952	97.7445	29.4	33.688
SE2513	P. lobata	Light 2M	Tank 3	83.33	High	6.1	147	132	89.7959	41219752	40121408	97.3354	28.7	32.2251
SE2514	P. lobata	Light 2M	Tank 3	94.44	High	3.77	145	130	89.6552	25955186	25231694	97.2125	30.7	33.2746
SE2515	P. lobata	Negative control	Negative control	0	None	11.54	122	107	87.7049	94383124	92215906	97.7038	49.7	49.7374
SE2536	E. aspera	Light 2M	Tank 1	0	None	5.53	145	130	89.6552	37922368	36927564	97.3767	28.4	36.1899
SE2537	E. aspera	Light 2M	Tank 1	16.67	Low	5.76	141	125	88.6525	40711752	39538238	97.1175	36.2	30.5515
SE2538	E. aspera	Light 2M	Tank 1	27.78	Low	4.09	145	129	88.9655	28174318	27030994	95.942	28	28.6203
SE2539	E. aspera	Light 2M	Tank 1	44.44	Low	1.97	142	126	88.7324	13796556	12960762	93.942	30.1	26.8881
SE2540	E. aspera	Light 2M	Tank 1	83.33	High	43.06	126	110	87.3016	341749408	334603994	97.9092	32.6	23.4836
SE2541	E. aspera	Light 2M	Tank 1	83.33	High	25.83	144	127	88.1944	179626322	173666106	96.6819	36.8	24.9372
SE2542	E. aspera	Light 2M	Tank 1	94.44	High	11.45	146	130	89.0411	78249172	75126212	96.009	33.7	17.6063
SE2543	E. aspera	Light 2M	Tank 2	0	None	73.05	131	115	87.7863	557187016	546335420	98.0524	28.3	23.8587
SE2544	E. aspera	Light 2M	Tank 2	16.67	Low	51.91	126	110	87.3016	412463898	402775810	97.6512	26.5	17.5156
SE2545	E. aspera	Light 2M	Tank 2	16.67	Low	10.95	134	118	88.0597	84778418	82814962	97.684	24.9	23.5263
SE2546	E. aspera	Light 2M	Tank 2	28.89	Low	4.35	144	128	88.8889	30200360	29304988	97.0352	25.4	20.9536
SE2547	E. aspera	Light 2M	Tank 2	75	High	5.14	145	129	88.9655	35402372	34180650	96.549	24.5	19.2434
SE2548	E. aspera	Light 2M	Tank 2	91.67	High	14.23	138	122	88.4058	102911716	100005744	97.1762	24.5	17.9812
SE2549	E. aspera	Light 2M	Tank 3	27.78	Low	14.35	142	126	88.7324	101159674	98364386	97.2368	32.3	30.4426
SE2550	E. aspera	Light 2M	Tank 3	44.44	Low	44.14	129	113	87.5969	340502282	333043530	97.8095	29.2	23.4756
SE2551	E. aspera	Light 2M	Tank 3	50	Low	3.56	143	128	89.5105	24764592	23715204	95.7625	39.4	35.5979
SE2552	E. aspera	Light 2M	Tank 3	94.44	High	8.06	142	126	88.7324	56585538	54792284	96.8309	28.4	26.1478
SE2553	E. aspera	Light 2M	Tank 3	100	High	73.61	125	109	87.2	588831544	575153892	97.6772	33.8	25.1643
SE2554	E. aspera	Light 2M	Tank 3	100	High	62.35	123	108	87.8049	504459964	491490010	97.4289	32.9	21.9191
SE2555	E. aspera	Negative control	Negative control	0	None	5.64	138	121	87.6812	40837044	39097048	95.7392	44.8	18.1248
SE6768	D. favus	Light 1M	Tank 1	0	None	10.48	146	131	89.726	71613586	69438464	96.9627	41	47.2835
SE6769	D. favus	Light 1M	Tank 1	0	None	9.79	145	130	89.6552	67153904	65110924	96.9578	37.2	42.4292
SE6770	D. favus	Light 1M	Tank 1	0	None	6.12	142	127	89.4366	42898610	41092850	95.7906	40.7	44.0077
SE6771	D. favus	Light 1M	Tank 1	16.67	Low	6.63	145	130	89.6552	45458940	43593658	95.8968	34.6	36.3655
SE6772	D. favus	Light 1M	Tank 1	33.33	Low	5.4	138	123	89.1304	38912464	36790426	94.5466	30	26.9187
SE6773	D. favus	Light 1M	Tank 2	0	None	11.43	142	127	89.4366	80251668	78671426	98.0309	30.6	35.3527
SE6774	D. favus	Light 1M	Tank 2	0	None	5.23	145	130	89.6552	35984056	34228732	95.1219	27.5	35.3171
SE6775	D. favus	Light 1M	Tank 2	0	None	9.17	145	130	89.6552	63124356	60380804	95.6537	34	38.6665
SE6776	D. favus	Light 1M	Tank 2	15.87	Low	5.34	145	130	89.6552	36680312	35326684	96.3097	29.1	34.0334
SE6777	D. favus	Light 1M	Tank 2	17.78	Low	3.42	144	129	89.5833	23697318	22777486	96.1184	28.8	32.3959
SE6778	D. favus	Light 1M	Tank 3	0	None	2.58	142	126	88.7324	18133710	16905530	93.2271	38.7	41.2632
SE6779	D. favus	Light 1M	Tank 3	0	None	1.44	143	128	89.5105	10029338	9483846	94.561	34.9	34.6914
SE6780	D. favus	Light 1M	Tank 3	0	None	2.04	140	125	89.2857	14504486	13817154	95.2612	38	40.3585
SE6781	D. favus	Light 1M	Tank 3	16.67	Low	1.53	138	122	88.4058	11101902	10416648	93.8276	40	42.3547
SE6782	D. favus	Light 1M	Tank 3	16.67	Low	2.16	140	124	88.5714	15457082	14778970	95.6129	38.8	41.5473
SE6783	D. favus	Light 1M	Tank 3	16.67	Low	6.34	138	123	89.1304	45901810	43734480	95.2783	39.9	42.3953
SE6784	D. favus	Light 1M	Tank 3	66.67	High	6.6	146	131	89.726	45057348	42155380	93.5594	38.2	38.4668
SE6785	D. favus	Negative control	Negative control	0	None	35.79	132	117	88.6364	269891450	265304212	98.3003	50.7	61.9576
SE6787	P. lobata	Light 1M	Tank 1	0	None	5.92	141	126	89.3617	41724882	40481018	97.0189	28.3	33.5027
SE6788	P. lobata	Light 1M	Tank 1	0	None	1.33	145	130	89.6552	9131720	8567844	93.8251	30.3	33.6793
SE6789	P. lobata	Light 1M	Tank 1	0	None	2.35	143	127	88.8112	16388408	15475380	94.4288	29.7	32.602
SE6790	P. lobata	Light 1M	Tank 1	17.78	Low	2.58	141	125	88.6525	18262972	17190986	94.1303	27.1	30.0437
SE6791	P. lobata	Light 1M	Tank 1	28.97	Low	2.87	139	124	89.2086	20625086	19603594	95.0473	27.9	29.924
SE6792	P. lobata	Light 1M	Tank 1	38.89	Low	10.34	142	127	89.4366	72362458	70608536	97.5762	31.7	34.7609
SE6793	P. lobata	Light 1M	Tank 2	0	None	3.21	143	127	88.8112	22493648	21640134	96.2055	32.5	42.3167
SE6794	P. lobata	Light 1M	Tank 2	0	None	2.48	142	127	89.4366	17334032	16206880	93.4975	31.6	39.0481
SE6795	P. lobata	Light 1M	Tank 2	0	None	1.88	143	128	89.5105	13111352	12592546	96.0431	33.2	37.5679
SE6796	P. lobata	Light 1M	Tank 2	17.78	Low	4.59	149	134	89.9329	30641738	25973858	84.7663	19.4	29.3344
SE6797	P. sinensis	Light 1M	Tank 1	0	None	2.35	146	131	89.726	16033262	15366544	95.8417	35.7	32.2154
SE6798	P. sinensis	Light 1M	Tank 1	0	None	10.14	145	130	89.6552	69866564	68019854	97.3568	37.5	40.1927
SE6799	P. sinensis	Light 1M	Tank 1	0	None	8.03	145	130	89.6552	55254582	53638786	97.0757	35	35.6431
SE6800	P. sinensis	Light 1M	Tank 1	16.67	Low	13.57	135	120	88.8889	100023690	97499330	97.4762	38.4	33.5507
SE6801	P. sinensis	Light 1M	Tank 1	31.75	Low	9.9	145	129	88.9655	68300352	65606474	96.0558	36.5	38.2008
SE6802	P. sinensis	Light 1M	Tank 1	42.06	Low	8.35	145	129	88.9655	57469458	55760986	97.0272	37.2	34.6782
SE6803	P. sinensis	Light 1M	Tank 1	61.9	High	14.02	139	124	89.2086	100543512	96681152	96.1585	36.9	35.3335
SE6804	P. sinensis	Light 1M	Tank 2	0	None	8.65	146	131	89.726	59105418	56819110	96.1318	31.9	38.7661
SE6805	P. sinensis	Light 1M	Tank 2	0	None	8.83	145	130	89.6552	60683448	58397960	96.2338	32.3	36.9154
SE6806	P. sinensis	Light 1M	Tank 2	0	None	8.32	144	129	89.5833	57708932	55841096	96.7634	30.7	37.9806
SE6807	P. sinensis	Light 1M	Tank 2	16.67	Low	10.23	143	128	89.5105	71306138	68330976	95.8276	29.9	32.8276
SE6808	P. sinensis	Light 1M	Tank 2	16.67	Low	13.9	133	117	87.9699	104531678	101713662	97.3042	33	35.3447
SE6809	P. sinensis	Light 1M	Tank 2	17.78	Low	11.93	141	126	89.3617	84291258	81271574	96.4176	32.9	39.0356
SE6810	P. sinensis	Light 1M	Tank 2	66.67	High	7.63	130	115	88.4615	58485936	55758640	95.3368	30.1	32.6952
SE6811	P. sinensis	Light 1M	Tank 3	0	None	13.62	140	125	89.2857	96809510	94392000	97.5028	39.8	45.1354
SE6812	P. sinensis	Light 1M	Tank 3	16.67	Low	2.77	134	119	88.806	20536192	19542398	95.1608	37.1	37.7466
SE6813	P. sinensis	Light 1M	Tank 3	2.22	Low	6.49	143	128	89.5105	45275614	43727304	96.5803	35.5	42.1285
SE6814	P. sinensis	Light 1M	Tank 3	38.89	Low	3.48	141	126	89.3617	24624038	23846136	96.8409	38.9	36.2906
SE6815	P. sinensis	Light 1M	Tank 3	66.67	High	4.15	135	120	88.8889	30620124	29356344	95.8727	40.6	36.5601
SE6816	P. sinensis	Light 1M	Tank 3	66.67	High	32.7	142	126	88.7324	230140838	221458054	96.2272	43.8	43.157
SE6817	P. sinensis	Light 1M	Tank 3	89.58	High	12.73	133	117	87.9699	95623642	92635772	96.8754	42.9	35.9478
SE6818	P. sinensis	Negative control	Negative control	0	None	10.66	127	112	88.189	83688442	81573552	97.4729	41	39.7218
SE6820	P. lobata	Light 1M	Tank 2	21.67	Low	3.66	141	126	89.3617	25861608	24368398	94.2262	27	31.4645
SE6821	P. lobata	Light 1M	Tank 2	30.56	Low	4.32	141	126	89.3617	30494716	29348038	96.2397	32	34.6605
SE6822	P. lobata	Light 1M	Tank 2	80	High	3.7	127	111	87.4016	29146308	27951322	95.9	24.2	23.9941
SE6823	P. lobata	Light 1M	Tank 3	0	None	3.64	137	121	88.3212	26544298	25914578	97.6277	33.2	31.4275
SE6824	P. lobata	Light 1M	Tank 3	0	None	4.6	142	127	89.4366	32289390	31351458	97.0952	28.2	34.7844
SE6825	P. lobata	Light 1M	Tank 3	0	None	3.7	134	119	88.806	27467156	26620958	96.9192	28.3	30.6445
SE6826	P. lobata	Light 1M	Tank 3	16.67	Low	3.36	138	122	88.4058	24376110	23417220	96.0663	30.4	29.5625
SE6827	P. lobata	Light 1M	Tank 3	16.67	Low	6.93	134	119	88.806	51499108	49774940	96.652	28.3	28.1354
SE6828	P. lobata	Light 1M	Tank 3	18.89	Low	12.92	140	125	89.2857	91870032	88883620	96.7493	30.8	30.1893
SE6829	P. lobata	Light 1M	Tank 3	74.44	High	8.13	137	122	89.0511	59165756	57521058	97.2202	31.1	28.4365
SE6830	P. lobata	Negative control	Negative control	0	None	13.47	115	100	86.9565	116746096	113219918	96.9796	49.5	23.4047
SE6832	E. aspera	Light 1M	Tank 1	0	None	7.29	146	130	89.0411	49966492	48477372	97.0198	31.6	36.9835
SE6833	E. aspera	Light 1M	Tank 1	0	None	10.72	141	126	89.3617	75627482	73975424	97.8155	34.2	43.0275
SE6834	E. aspera	Light 1M	Tank 1	29.58	Low	4.57	145	130	89.6552	31381594	30433096	96.9775	34.7	42.0205
SE6835	E. aspera	Light 1M	Tank 2	0	None	4.6	146	129	88.3562	31427360	30013546	95.5013	28.5	22.2666
SE6836	E. aspera	Light 1M	Tank 2	0	None	6.99	145	130	89.6552	48061394	46637168	97.0367	35.8	37.6434
SE6837	E. aspera	Light 1M	Tank 2	16.67	Low	4	144	126	87.5	27747548	26622526	95.9455	32	23.5722
SE6838	E. aspera	Light 1M	Tank 2	18.89	Low	14.44	126	111	88.0952	113956064	111066630	97.4644	33.6	28.9124
SE6839	E. aspera	Light 1M	Tank 2	38.89	Low	18.46	131	115	87.7863	140571282	137100490	97.5309	29.5	18.1835
SE6840	E. aspera	Light 1M	Tank 2	57.14	High	9.95	140	123	87.8571	70981626	68498488	96.5017	30.4	19.8198
SE6841	E. aspera	Light 1M	Tank 3	0	None	9.43	145	129	88.9655	64905550	63197934	97.3691	39.8	41.1469
SE6842	E. aspera	Light 1M	Tank 3	0	None	12.45	146	130	89.0411	84902172	82471290	97.1368	35.9	33.7392
SE6843	E. aspera	Light 1M	Tank 3	0	None	15.31	146	130	89.0411	104542556	101575600	97.162	37.8	35.8228
SE6844	E. aspera	Light 1M	Tank 3	16.67	Low	14.86	137	121	88.3212	108207872	105315960	97.3274	34.4	31.1603
SE6845	E. aspera	Light 1M	Tank 3	16.67	Low	4.85	147	132	89.7959	32887126	32172130	97.8259	35.7	46.799
SE6846	E. aspera	Light 1M	Tank 3	21.75	Low	3.78	147	132	89.7959	25628992	24885428	97.0987	37.9	45.0081
SE6847	E. aspera	Light 1M	Tank 3	83.33	High	2.23	138	123	89.1304	16074452	15482462	96.3172	36.2	28.2774
SE6848	E. aspera	Dark 2M	Tank 1	0	None	3.41	141	125	88.6525	24154044	23492190	97.2599	29.5	23.0356
SE6849	E. aspera	Dark 2M	Tank 1	0	None	9.63	138	123	89.1304	69356724	67660166	97.5539	35.4	30.8614
SE6850	E. aspera	Dark 2M	Tank 1	0	None	10.57	133	118	88.7218	79233246	77339618	97.6101	35.3	29.9076
SE6851	E. aspera	Dark 2M	Tank 1	16.67	Low	7.97	135	119	88.1481	58970962	57570158	97.6246	32.1	26.0586
SE6852	E. aspera	Dark 2M	Tank 1	27.78	Low	3.09	145	130	89.6552	21242326	20620228	97.0714	33	28.3519
SE6853	E. aspera	Dark 2M	Tank 1	66.67	High	13.72	126	110	87.3016	108989440	105899078	97.1645	24.7	16.1148
SE6854	E. aspera	Dark 2M	Tank 2	0	None	18.96	130	115	88.4615	145355282	142386220	97.9574	33.5	27.6446
SE6855	E. aspera	Dark 2M	Tank 2	0	None	11.28	136	121	88.9706	82544948	80612288	97.6587	33.1	27.1924
SE6856	E. aspera	Dark 2M	Tank 2	0	None	19.27	136	121	88.9706	141319816	138606382	98.0799	35	27.6301
SE6857	E. aspera	Dark 2M	Tank 2	16.67	Low	9.45	136	120	88.2353	69436786	67894372	97.7787	34.2	27.757
SE6858	E. aspera	Dark 2M	Tank 2	38.89	Low	9.93	147	132	89.7959	67350080	65212564	96.8263	41.7	38.2663
SE6859	E. aspera	Dark 2M	Tank 2	66.67	High	5.11	146	130	89.0411	34888632	33600448	96.3077	41.6	37.8609
SE6860	E. aspera	Dark 2M	Tank 2	84.52	High	8.61	142	126	88.7324	60479454	58213014	96.2525	41	31.2702
SE6861	E. aspera	Dark 2M	Tank 3	0	None	8.61	146	131	89.726	58893496	57369144	97.4117	38.5	39.7345
SE6862	E. aspera	Dark 2M	Tank 3	0	None	9.73	143	128	89.5105	67998626	66568122	97.8963	34.2	32.8849
SE6863	E. aspera	Dark 2M	Tank 3	0	None	10.14	141	125	88.6525	71903402	70394278	97.9012	33.8	32.3998
SE6864	E. aspera	Dark 2M	Tank 3	16.67	Low	46.29	137	122	89.0511	336460600	330146684	98.1234	37	32.2739
SE6865	E. aspera	Dark 2M	Tank 3	16.67	Low	4.11	147	131	89.1156	27956014	27077702	96.8582	39.7	36.8966
SE6866	E. aspera	Dark 2M	Tank 3	16.67	Low	18.73	145	130	89.6552	128381810	125441642	97.7098	32.2	32.5142
SE6867	E. aspera	Dark 2M	Tank 3	63.33	High	9.94	143	127	88.8112	69426464	67359774	97.0232	38.2	40.9683
SE6868	E. aspera	Negative control	Negative control	0	na	4.34	144	128	88.8889	30133884	29479526	97.8285	45	48.2722
SE6869	Extraction blank	Extraction blank	Extraction blank	0	na	0.02	116	87	75	231754	145210	62.657	32.6	0
SE2470	Extraction blank	Extraction blank	Extraction blank	0	na	0.01	115	99	86.087	71542	68126	95.2252	33.3	0
SE2493	Extraction blank	Extraction blank	Extraction blank	0	na	0.19	122	103	84.4262	1551404	1294172	83.4194	31.8	12.2088
SE2556	Extraction blank	Extraction blank	Extraction blank	0	na	0.35	131	108	82.4427	2671056	1795410	67.2172	26.1	3.58481
SE6786	Extraction blank	Extraction blank	Extraction blank	0	na	0.24	132	114	86.3636	1851782	1600124	86.41	29.7	15.7676
SE6819	Extraction blank	Extraction blank	Extraction blank	0	na	0.1	136	104	76.4706	758914	282202	37.185	21.6	0.88483
SE6831	Extraction blank	Extraction blank	Extraction blank	0	na	0.27	76	55	72.3684	3582622	2963646	82.7228	3.9	0
					Mean	10.5302	140.183	124.811	89.009	7.69798e+07	7.49258e+07	96.7548	33.46	33.073
					SD	12.0921	6.47193	6.51999	0.686868	9.416e+07	9.21921e+07	1.51322	5.29907	7.22776

## Sheet: S3
Sample data					Assembly stats
Sample_ID	Coral	Treatment	Tank	Settlement category	Total contigs	Total contigs (>1500 bp)	Largest contig	Total bases	Total bases (contigs >1500 bp)	Reads mapped to assembly (%)	SCM genes in assembly
SE2451	P. sinensis	Light 2M	Tank 1	None	3761714	54479	1249164	1424449929	237984166	65.1731	71.5
SE2454	P. sinensis	Light 2M	Tank 1	Low	8679602	220060	1869248	3849689941	993010319	70.4955	71.1
SE2457	P. sinensis	Light 2M	Tank 1	High	2647705	42332	776874	1010067096	185306092	55.2922	65.3
SE2458	P. sinensis	Light 2M	Tank 2	None	2205347	17652	650573	717813917	73533370	40.2933	53.6
SE2460	P. sinensis	Light 2M	Tank 2	Low	9807079	85062	2070483	3248261104	310592136	53.6379	56.2
SE2461	P. sinensis	Light 2M	Tank 2	High	1991134	16881	1044924	617187059	56477308	42.8784	56.7
SE2464	P. sinensis	Light 2M	Tank 3	Low	6019377	85398	920532	2171180773	322670919	61.8492	67.4
SE2468	P. sinensis	Light 2M	Tank 3	High	1362223	11400	850992	457200387	49450620	43.7614	64.5
SE2473	D. favus	Light 2M	Tank 1	Low	4983465	102866	1511016	2056373995	433457283	65.4663	66.8
SE2477	D. favus	Light 2M	Tank 2	High	2079467	27969	994970	735403953	109952690	50.0125	63.6
SE2478	D. favus	Light 2M	Tank 2	None	3472296	39152	688717	1184032037	135411200	45.7135	56.1
SE2479	D. favus	Light 2M	Tank 2	Low	1816205	12649	1240328	564677467	45800606	43.5805	60.5
SE2484	D. favus	Light 2M	Tank 3	High	2626759	18676	602710	808773057	60304238	48.8307	61.2
SE2485	D. favus	Light 2M	Tank 3	None	6192520	99068	955569	2384710569	420802625	61.8049	66.6
SE2488	D. favus	Light 2M	Tank 3	Low	1160868	2828	172901	334969639	8055422	35.8558	61.2
SE2490	D. favus	Light 2M	Tank 3	High	3526513	59282	1240469	1330310939	235855893	51.5965	62.2
SE2496	P. lobata	Light 2M	Tank 1	None	1051307	11575	850237	354648313	47785545	39.5892	61.8
SE2498	P. lobata	Light 2M	Tank 1	Low	1654585	30859	2986056	661990644	146159445	51.1304	61.8
SE2500	P. lobata	Light 2M	Tank 1	High	456551	4632	229597	154172920	18581417	34.9383	62.6
SE2503	P. lobata	Light 2M	Tank 2	None	1515345	9598	1325484	477862311	47059915	45.1462	58.8
SE2506	P. lobata	Light 2M	Tank 2	Low	2740715	42454	1133689	1029559120	174110786	52.4313	59.6
SE2507	P. lobata	Light 2M	Tank 2	High	1254239	12131	1454741	429000923	61840087	40.036	56.1
SE2508	P. lobata	Light 2M	Tank 3	None	1056960	6481	611978	330319525	23574074	37.7787	61.7
SE2510	P. lobata	Light 2M	Tank 3	Low	2180889	26041	929493	793840920	116722410	54.9515	65.8
SE2513	P. lobata	Light 2M	Tank 3	High	1395037	10274	688893	430633799	29213198	44.7836	62.2
SE2536	E. aspera	Light 2M	Tank 1	None	1400179	23390	558163	543812131	102709274	51.0408	56.9
SE2537	E. aspera	Light 2M	Tank 1	Low	1435184	28247	462029	552453467	121365086	57.3139	66.8
SE2540	E. aspera	Light 2M	Tank 1	High	6398002	163133	1438589	2551834094	622157127	69.3842	68.5
SE2543	E. aspera	Light 2M	Tank 2	None	14688073	288535	1153640	5632984009	1056488927	64.3307	58.2
SE2544	E. aspera	Light 2M	Tank 2	Low	9922568	151113	810335	3470999042	546336458	61.7043	54.7
SE2548	E. aspera	Light 2M	Tank 2	High	3920611	47643	1529702	1333573393	137837942	51.2318	53.5
SE2550	E. aspera	Light 2M	Tank 3	Low	8828051	148823	896225	3247457013	526455530	63.4223	57.3
SE2553	E. aspera	Light 2M	Tank 3	High	12326380	244277	1802190	4775667579	941748857	67.5293	64.4
SE6768	D. favus	Light 1M	Tank 1	None	1901354	49581	1242083	849960085	247824020	60.8759	67.8
SE6771	D. favus	Light 1M	Tank 1	Low	1095809	24708	651408	433313508	101681318	44.2945	60.7
SE6773	D. favus	Light 1M	Tank 2	None	2775204	39443	691163	1008668098	168781448	56.2922	63.6
SE6776	D. favus	Light 1M	Tank 2	Low	1333404	22522	592117	513606944	110518205	44.3531	58
SE6778	D. favus	Light 1M	Tank 3	None	342125	5883	322111	125701896	23165094	33.3081	63.4
SE6783	D. favus	Light 1M	Tank 3	Low	1252995	26694	909123	512439213	124097001	48.8638	66.4
SE6784	D. favus	Light 1M	Tank 3	High	779477	12623	617375	292452913	57915210	39.724	64.7
SE6788	P. lobata	Light 1M	Tank 1	None	270376	2972	737897	92383509	13755073	30.2631	56.3
SE6792	P. lobata	Light 1M	Tank 1	Low	2102866	44946	1325284	867387738	209345582	51.3373	61.1
SE6793	P. lobata	Light 1M	Tank 2	None	537138	6153	564097	214686362	60155474	45.5557	62.1
SE6798	P. sinensis	Light 1M	Tank 1	None	2467380	47904	870422	1015790239	230206687	58.8539	67.4
SE6801	P. sinensis	Light 1M	Tank 1	Low	1862189	37546	1106883	754022186	183557571	49.9719	63.7
SE6803	P. sinensis	Light 1M	Tank 1	High	2315750	43982	1552603	887516341	181496407	50.5185	64.8
SE6805	P. sinensis	Light 1M	Tank 2	None	1579531	42410	688717	666605515	192321216	53.5783	63.5
SE6808	P. sinensis	Light 1M	Tank 2	Low	3146343	54432	873260	1194771314	243863766	54.2958	64.1
SE6810	P. sinensis	Light 1M	Tank 2	High	1039179	19125	365021	395074951	77449885	35.2535	58.1
SE6811	P. sinensis	Light 1M	Tank 3	None	2772540	65464	1136428	1200741198	300070214	62.7911	70.6
SE6813	P. sinensis	Light 1M	Tank 3	Low	1434646	30001	618398	581448989	138339937	49.4804	63.2
SE6816	P. sinensis	Light 1M	Tank 3	High	4454222	124564	1226494	2014079950	612309893	67.9101	70.2
SE6820	P. lobata	Light 1M	Tank 2	Low	749883	9711	600326	261437255	42078447	37.8885	57.1
SE6822	P. lobata	Light 1M	Tank 2	High	1012353	9431	458205	329352839	33308268	33.052	54.7
SE6825	P. lobata	Light 1M	Tank 3	None	928942	11298	955906	318574206	45010579	35.7337	60.9
SE6828	P. lobata	Light 1M	Tank 3	Low	2691266	45817	1206913	1030077247	178693654	52.878	61.7
SE6829	P. lobata	Light 1M	Tank 3	High	1162547	13174	495660	412139329	69384426	37.9562	61.2
SE6833	E. aspera	Light 1M	Tank 1	None	2629135	52405	881688	1074307339	255044530	61.6182	67.2
SE6834	E. aspera	Light 1M	Tank 1	Low	1085518	24396	370740	423020678	84499557	52.8359	67.1
SE6836	E. aspera	Light 1M	Tank 2	None	1752611	23512	645158	643453029	106750577	57.7555	67.5
SE6838	E. aspera	Light 1M	Tank 2	Low	3356827	33182	1057103	1164502424	164980745	57.2928	65.1
SE6840	E. aspera	Light 1M	Tank 2	High	2012837	24247	383856	691109986	79948323	62.6796	64.3
SE6842	E. aspera	Light 1M	Tank 3	None	2869661	49304	683846	1113029437	205191426	59.8572	67
SE6844	E. aspera	Light 1M	Tank 3	Low	3399436	42320	602507	1212402876	172623045	62.3745	62.5
SE6847	E. aspera	Light 1M	Tank 3	High	380763	2106	46576	115230484	10584046	31.4293	66.1
SE6850	E. aspera	Dark 2M	Tank 1	None	2999623	23997	909064	980647114	113436385	45.8	56.8
SE6851	E. aspera	Dark 2M	Tank 1	Low	2452000	20733	989781	790950110	87034583	41.2768	52.8
SE6853	E. aspera	Dark 2M	Tank 1	High	3709007	25520	519796	1145604409	97353753	44.1104	47.4
SE6856	E. aspera	Dark 2M	Tank 2	None	5261208	47535	674864	1719334725	197313212	47.8634	55.6
SE6858	E. aspera	Dark 2M	Tank 2	Low	1732014	18867	1412730	593169091	91871670	51.4809	58.6
SE6860	E. aspera	Dark 2M	Tank 2	High	890603	8818	859370	288450717	44594464	40.9404	57.6
SE6863	E. aspera	Dark 2M	Tank 3	None	2918444	27767	1340390	983984758	130615601	47.4087	54.3
SE6864	E. aspera	Dark 2M	Tank 3	Low	10847993	123947	888025	3845125285	550865696	58.9401	58.9
SE6867	E. aspera	Dark 2M	Tank 3	High	1806984	21401	912859	634944666	99856087	53.842	59
				Mean =	3.03607e+06	47370.3	928199	1.1224e+09	1.96442e+08	50.48	61.7338
				Std Dev =	2.90298e+06	55412.4	466870	1.10175e+09	2.19011e+08	10.1506	4.92523

## Sheet: S4
Bin Id	Marker lineage	# genomes	# markers	# marker sets	0	1	2	3	4	5+	Completeness	Contamination	Strain heterogeneity	Final MAG
SE6850.concoct.036	c__Gammaproteobacteria (UID4444)	263	506	232	0	505	1	0	0	0	100	0.07	0	N
SE6856.concoct.125	c__Gammaproteobacteria (UID4444)	263	506	232	0	505	1	0	0	0	100	0.07	0	N
SE6863.metabat2_refined.033	c__Gammaproteobacteria (UID4444)	263	506	232	0	505	1	0	0	0	100	0.07	0	Y
SE6864.concoct.022	c__Gammaproteobacteria (UID4444)	263	506	232	0	505	1	0	0	0	100	0.07	0	N
SE6768.metabat2_refined.067	c__Gammaproteobacteria (UID4444)	263	507	232	0	505	2	0	0	0	100	0.52	0	N
SE6798.semibin_refined.063_sub	c__Gammaproteobacteria (UID4444)	263	507	232	0	505	2	0	0	0	100	0.52	0	Y
SE2454.metabat2_refined.100	k__Bacteria (UID2569)	434	278	186	0	277	1	0	0	0	100	0.54	0	Y
SE2544.maxbin.018	c__Gammaproteobacteria (UID4444)	263	506	232	0	502	4	0	0	0	100	0.7	0	N
SE6808.metabat_sspec.013_sub	o__Rhizobiales (UID3447)	356	416	249	0	413	2	1	0	0	100	0.7	20	Y
SE6773.metabat_sens.033_sub	c__Gammaproteobacteria (UID4761)	52	693	297	0	685	8	0	0	0	100	0.8	50	N
SE2543.vamb.057	k__Bacteria (UID2982)	88	229	147	0	226	3	0	0	0	100	1.7	0	Y
SE2464.maxbin.033	c__Gammaproteobacteria (UID4444)	263	507	232	0	502	4	1	0	0	100	1.81	28.57	Y
SE2543.semibin_refined.001	k__Bacteria (UID2982)	88	229	147	0	225	4	0	0	0	100	2.72	0	Y
SE6803.maxbin.009	c__Gammaproteobacteria (UID4444)	263	507	232	0	466	41	0	0	0	100	9.4	0	N
SE2485.maxbin.030_sub	f__Rhodobacteraceae (UID3360)	56	582	313	0	531	48	3	0	0	100	9.45	19.3	N
SE6864.metabat_sens.002_sub	c__Gammaproteobacteria (UID4444)	263	507	232	1	502	4	0	0	0	99.98	0.8	0	N
SE2540.semibin_refined.022	o__Rhizobiales (UID3447)	356	416	249	2	411	3	0	0	0	99.97	0.63	66.67	Y
SE2540.semibin_refined.035	k__Bacteria (UID2565)	2921	140	85	1	138	1	0	0	0	99.93	1.18	0	Y
SE2498.semibin_refined.028	c__Gammaproteobacteria (UID4761)	52	693	297	1	690	2	0	0	0	99.89	0.51	0	N
SE6793.metabat2_refined.001	c__Gammaproteobacteria (UID4761)	52	693	297	1	690	2	0	0	0	99.89	0.51	0	Y
SE6768.metabat2_refined.038	c__Gammaproteobacteria (UID4761)	52	693	297	3	668	22	0	0	0	99.8	2.38	22.73	N
SE6850.metabat_sspec.025	f__Rhodobacteraceae (UID3356)	67	617	330	2	612	3	0	0	0	99.79	0.76	0	Y
SE6863.maxbin.011	f__Rhodobacteraceae (UID3356)	67	617	330	2	611	4	0	0	0	99.79	0.86	0	N
SE6851.metabat2_refined.015	f__Rhodobacteraceae (UID3356)	67	617	330	2	610	5	0	0	0	99.79	0.93	40	N
SE6858.concoct.061	c__Alphaproteobacteria (UID3305)	564	349	230	1	347	1	0	0	0	99.78	0.14	0	Y
SE2451.maxbin.001	c__Alphaproteobacteria (UID3305)	564	349	230	1	347	1	0	0	0	99.78	0.22	0	N
SE2454.maxbin.001	c__Alphaproteobacteria (UID3305)	564	349	230	1	347	1	0	0	0	99.78	0.22	0	N
SE2457.maxbin.001	c__Alphaproteobacteria (UID3305)	564	349	230	1	347	1	0	0	0	99.78	0.22	0	N
SE2458.maxbin.001	c__Alphaproteobacteria (UID3305)	564	349	230	1	347	1	0	0	0	99.78	0.22	0	N
SE2464.maxbin.002	c__Alphaproteobacteria (UID3305)	564	349	230	1	347	1	0	0	0	99.78	0.22	0	N
SE2468.maxbin.001	c__Alphaproteobacteria (UID3305)	564	349	230	1	347	1	0	0	0	99.78	0.22	0	N
SE2473.maxbin.001	c__Alphaproteobacteria (UID3305)	564	349	230	1	347	1	0	0	0	99.78	0.22	0	N
SE2478.maxbin.001	c__Alphaproteobacteria (UID3305)	564	349	230	1	347	1	0	0	0	99.78	0.22	0	N
SE2479.concoct.053	c__Alphaproteobacteria (UID3305)	564	349	230	1	347	1	0	0	0	99.78	0.22	0	Y
SE2484.semibin_refined.001	c__Alphaproteobacteria (UID3305)	564	349	230	1	347	1	0	0	0	99.78	0.22	0	N
SE2485.maxbin.001	c__Alphaproteobacteria (UID3305)	564	349	230	1	347	1	0	0	0	99.78	0.22	0	N
SE2490.semibin_refined.001	c__Alphaproteobacteria (UID3305)	564	349	230	1	347	1	0	0	0	99.78	0.22	0	N
SE2506.maxbin.001	c__Alphaproteobacteria (UID3305)	564	349	230	1	347	1	0	0	0	99.78	0.22	0	N
SE2507.maxbin.001	c__Alphaproteobacteria (UID3305)	564	349	230	1	347	1	0	0	0	99.78	0.22	0	N
SE2513.maxbin.001	c__Alphaproteobacteria (UID3305)	564	349	230	1	347	1	0	0	0	99.78	0.22	0	N
SE2536.maxbin.001	c__Alphaproteobacteria (UID3305)	564	349	230	1	347	1	0	0	0	99.78	0.22	0	N
SE2540.maxbin.001	c__Alphaproteobacteria (UID3305)	564	349	230	1	347	1	0	0	0	99.78	0.22	0	N
SE2544.maxbin.001	c__Alphaproteobacteria (UID3305)	564	349	230	1	347	1	0	0	0	99.78	0.22	0	N
SE2548.semibin_refined.012	c__Alphaproteobacteria (UID3305)	564	349	230	1	347	1	0	0	0	99.78	0.22	0	N
SE6773.maxbin.005	c__Alphaproteobacteria (UID3305)	564	349	230	1	347	1	0	0	0	99.78	0.22	0	N
SE6783.metabat_sens.006	c__Alphaproteobacteria (UID3305)	564	349	230	1	347	1	0	0	0	99.78	0.22	0	N
SE6798.semibin_refined.082	c__Alphaproteobacteria (UID3305)	564	349	230	1	347	1	0	0	0	99.78	0.22	0	N
SE6805.semibin_refined.001	c__Alphaproteobacteria (UID3305)	564	349	230	1	347	1	0	0	0	99.78	0.22	0	N
SE6808.maxbin.012	c__Alphaproteobacteria (UID3305)	564	349	230	1	347	1	0	0	0	99.78	0.22	0	N
SE6816.maxbin.001	c__Alphaproteobacteria (UID3305)	564	349	230	1	347	1	0	0	0	99.78	0.22	0	N
SE6842.maxbin.001	c__Alphaproteobacteria (UID3305)	564	349	230	1	347	1	0	0	0	99.78	0.22	0	N
SE6864.semibin_refined.180	c__Alphaproteobacteria (UID3305)	564	349	230	1	347	1	0	0	0	99.78	0.22	0	N
SE2460.maxbin.001	c__Alphaproteobacteria (UID3305)	564	349	230	1	344	4	0	0	0	99.78	0.26	75	N
SE2553.metabat_spec.026	c__Alphaproteobacteria (UID3305)	564	349	230	1	346	2	0	0	0	99.78	0.36	0	N
SE6803.metabat_sens.014	c__Alphaproteobacteria (UID3305)	564	349	230	1	346	2	0	0	0	99.78	0.43	0	N
SE6813.maxbin.001	c__Alphaproteobacteria (UID3305)	564	349	230	1	346	2	0	0	0	99.78	0.43	0	N
SE6853.concoct.066	c__Alphaproteobacteria (UID3305)	564	349	230	1	346	2	0	0	0	99.78	0.43	0	Y
SE2477.semibin_refined.050	c__Alphaproteobacteria (UID3305)	564	349	230	1	346	2	0	0	0	99.78	0.43	50	N
SE6808.metabat_sens.022_sub	c__Gammaproteobacteria (UID4444)	263	507	232	1	503	3	0	0	0	99.78	0.57	0	Y
SE2503.semibin_refined.016	c__Alphaproteobacteria (UID3305)	564	349	230	1	346	2	0	0	0	99.78	0.65	0	N
SE6844.metabat_sens.005	c__Alphaproteobacteria (UID3305)	564	349	230	1	346	2	0	0	0	99.78	0.65	0	N
SE6798.maxbin.009	c__Alphaproteobacteria (UID3305)	564	349	230	1	345	3	0	0	0	99.78	0.87	0	N
SE6851.metabat_sens.005	c__Alphaproteobacteria (UID3305)	564	349	230	1	342	6	0	0	0	99.78	1.03	66.67	N
SE6778.metabat_spec.005	c__Alphaproteobacteria (UID3305)	564	349	230	1	340	8	0	0	0	99.78	1.47	0	N
SE2550.metabat_spec.013	c__Alphaproteobacteria (UID3305)	564	349	230	1	344	4	0	0	0	99.78	1.52	0	N
SE6860.metabat_sens.003	c__Alphaproteobacteria (UID3305)	564	349	230	1	340	8	0	0	0	99.78	1.59	25	N
SE6863.metabat_sens.010	c__Alphaproteobacteria (UID3305)	564	349	230	1	342	6	0	0	0	99.78	1.78	33.33	N
SE6811.metabat_sens.012	c__Alphaproteobacteria (UID3305)	564	349	230	1	343	5	0	0	0	99.78	1.96	80	N
SE2508.metabat_spec.006	c__Alphaproteobacteria (UID3305)	564	349	230	1	339	9	0	0	0	99.78	2.17	0	N
SE6784.metabat_sens.002	c__Alphaproteobacteria (UID3305)	564	349	230	1	342	6	0	0	0	99.78	2.39	0	N
SE6858.metabat_spec.027	o__Rhizobiales (UID3447)	356	416	249	2	408	6	0	0	0	99.76	1.91	33.33	N
SE2507.semibin_refined.008	p__Bacteroidetes (UID2591)	364	298	198	1	292	4	1	0	0	99.75	1.29	0	Y
SE6833.metabat2_refined.048	c__Alphaproteobacteria (UID3305)	564	349	230	4	344	1	0	0	0	99.74	0.22	0	N
SE2454.maxbin.009	c__Alphaproteobacteria (UID3305)	564	349	230	2	344	3	0	0	0	99.74	1.3	66.67	N
SE6816.rosella_refined.015	c__Alphaproteobacteria (UID3422)	26	529	308	2	521	6	0	0	0	99.73	1.05	33.33	Y
SE6850.metabat2_refined.020	o__Rhodospirillales (UID3754)	63	336	201	2	327	7	0	0	0	99.72	1.87	28.57	Y
SE6811.metabat_sens.022_sub	f__Rhodobacteraceae (UID3375)	32	625	283	3	610	10	2	0	0	99.72	2.6	25	Y
SE2454.semibin_refined.322	f__Rhodobacteraceae (UID3360)	56	582	313	12	563	7	0	0	0	99.71	1.44	28.57	Y
SE2550.maxbin.045	f__Rhodobacteraceae (UID3356)	67	617	330	1	606	9	1	0	0	99.7	2.02	16.67	Y
SE2454.concoct.032	c__Alphaproteobacteria (UID3422)	26	529	308	1	525	3	0	0	0	99.68	0.54	0	Y
SE2485.metabat_spec.002	c__Alphaproteobacteria (UID3422)	26	529	308	1	526	2	0	0	0	99.68	0.65	0	N
SE2553.semibin_refined.288	c__Alphaproteobacteria (UID3422)	26	529	308	1	526	2	0	0	0	99.68	0.65	0	Y
SE6816.metabat_sens.002	c__Alphaproteobacteria (UID3422)	26	529	308	1	526	2	0	0	0	99.68	0.65	0	N
SE6842.rosella_refined.060	c__Alphaproteobacteria (UID3422)	26	529	308	1	526	2	0	0	0	99.68	0.65	0	N
SE6825.metabat_sens.009	c__Alphaproteobacteria (UID3422)	26	529	308	1	525	3	0	0	0	99.68	0.71	0	N
SE6828.semibin_refined.001	c__Alphaproteobacteria (UID3422)	26	529	308	1	525	3	0	0	0	99.68	0.71	33.33	N
SE6811.metabat_sens.036	c__Alphaproteobacteria (UID3422)	26	529	308	1	525	3	0	0	0	99.68	0.73	33.33	N
SE2490.concoct.055	c__Alphaproteobacteria (UID3422)	26	529	308	1	524	4	0	0	0	99.68	0.97	0	N
SE2550.semibin_refined.159	c__Alphaproteobacteria (UID3422)	26	529	308	1	521	7	0	0	0	99.68	1.54	28.57	N
SE6816.rosella_refined.045	f__Rhodobacteraceae (UID3360)	56	582	313	2	580	0	0	0	0	99.57	0	0	Y
SE2543.semibin_refined.058	c__Gammaproteobacteria (UID4444)	263	506	232	2	503	1	0	0	0	99.57	0.07	0	N
SE6863.metabat_sens.039	f__Rhodobacteraceae (UID3360)	56	582	313	2	578	2	0	0	0	99.57	0.1	100	N
SE6776.maxbin.011	c__Alphaproteobacteria (UID3305)	564	349	230	2	346	1	0	0	0	99.57	0.22	0	N
SE6816.semibin_refined.045	c__Gammaproteobacteria (UID4444)	263	507	232	3	503	1	0	0	0	99.57	0.43	0	Y
SE6833.concoct.095	c__Gammaproteobacteria (UID4444)	263	507	232	3	503	1	0	0	0	99.57	0.43	0	N
SE6784.metabat_spec.011	f__Rhodobacteraceae (UID3360)	56	582	313	2	566	14	0	0	0	99.57	0.46	85.71	N
SE6864.metabat_sens.003	f__Rhodobacteraceae (UID3360)	56	582	313	2	578	2	0	0	0	99.57	0.64	100	N
SE2454.concoct.064	o__Oceanospirillales (UID4446)	43	529	233	1	525	3	0	0	0	99.57	0.89	100	N
SE2510.maxbin.024_sub	c__Alphaproteobacteria (UID3305)	564	349	230	1	344	4	0	0	0	99.57	1.52	0	Y
SE6850.semibin_refined.019	c__Alphaproteobacteria (UID3305)	564	349	230	2	341	6	0	0	0	99.57	1.96	0	N
SE6822.metabat_sens.001	c__Gammaproteobacteria (UID4761)	52	693	297	2	689	2	0	0	0	99.55	0.51	0	N
SE6820.semibin_refined.001	c__Gammaproteobacteria (UID4761)	52	693	297	2	688	3	0	0	0	99.55	0.67	0	N
SE2553.metabat_sens.006	f__Rhodobacteraceae (UID3360)	56	582	313	3	575	4	0	0	0	99.55	0.75	50	N
SE6828.semibin_refined.033	c__Gammaproteobacteria (UID4761)	52	693	297	2	683	7	1	0	0	99.55	1.27	20	N
SE2473.concoct.133	c__Gammaproteobacteria (UID4761)	52	693	297	2	683	7	1	0	0	99.55	2.02	0	N
SE2540.maxbin.035	c__Gammaproteobacteria (UID4761)	52	693	297	2	679	11	1	0	0	99.55	2.3	7.14	N
SE6851.rosella_refined.003	c__Gammaproteobacteria (UID4444)	263	506	232	4	501	1	0	0	0	99.5	0.07	0	N
SE2506.rosella_refined.040	c__Gammaproteobacteria (UID4761)	52	693	297	3	685	4	1	0	0	99.49	1.03	14.29	N
SE6829.metabat_sens.006	c__Gammaproteobacteria (UID4761)	52	693	297	4	686	3	0	0	0	99.47	0.54	0	N
SE6816.concoct.205	f__Rhodobacteraceae (UID3375)	32	625	283	2	608	13	1	1	0	99.47	3.48	4.55	N
SE6801.metabat_sens.003	c__Gammaproteobacteria (UID4444)	263	507	232	5	498	4	0	0	0	99.46	0.71	25	N
SE2460.semibin_refined.005	k__Bacteria (UID2570)	433	267	178	1	266	0	0	0	0	99.44	0	0	Y
SE6808.maxbin.054	o__Oceanospirillales (UID4446)	43	529	233	3	522	4	0	0	0	99.44	0.74	25	Y
SE2544.semibin_refined.112	k__Bacteria (UID2570)	433	267	178	1	260	6	0	0	0	99.44	1.74	16.67	Y
SE2451.semibin_refined.086	f__Rhodobacteraceae (UID3360)	56	582	313	3	572	7	0	0	0	99.41	0.7	42.86	N
SE2457.metabat_spec.044	f__Rhodobacteraceae (UID3360)	56	582	313	4	559	19	0	0	0	99.41	2.88	21.05	N
SE6805.rosella_refined.065	o__Oceanospirillales (UID4446)	43	529	233	5	524	0	0	0	0	99.38	0	0	Y
SE2485.metabat_sens.033_sub	c__Gammaproteobacteria (UID4444)	263	507	232	5	493	8	1	0	0	99.38	1.98	27.27	N
SE6771.vamb.012	c__Gammaproteobacteria (UID4761)	52	693	297	7	683	3	0	0	0	99.37	0.45	33.33	Y
SE2543.semibin_refined.267	f__Rhodobacteraceae (UID3360)	56	582	313	2	577	3	0	0	0	99.36	0.36	33.33	N
SE6860.metabat_spec.012	f__Rhodobacteraceae (UID3360)	56	582	313	2	577	3	0	0	0	99.36	0.36	33.33	N
SE6858.maxbin.003	f__Rhodobacteraceae (UID3360)	56	582	313	2	576	4	0	0	0	99.36	0.82	50	N
SE6816.maxbin.105	o__Oceanospirillales (UID4446)	43	529	233	2	519	8	0	0	0	99.36	1.18	62.5	N
SE2473.maxbin.032	c__Alphaproteobacteria (UID3305)	564	349	230	2	347	0	0	0	0	99.35	0	0	N
SE2498.concoct.042	c__Alphaproteobacteria (UID3305)	564	349	230	2	347	0	0	0	0	99.35	0	0	Y
SE6834.concoct.024	c__Alphaproteobacteria (UID3305)	564	349	230	3	345	1	0	0	0	99.35	0.22	0	N
SE2506.semibin_refined.062	c__Alphaproteobacteria (UID3305)	564	349	230	2	346	1	0	0	0	99.35	0.43	0	N
SE6792.maxbin.032_sub	c__Alphaproteobacteria (UID3305)	564	349	230	2	346	1	0	0	0	99.35	0.43	0	N
SE6863.concoct.060	c__Alphaproteobacteria (UID3305)	564	349	230	2	345	2	0	0	0	99.35	0.43	0	N
SE6864.vamb.038	c__Gammaproteobacteria (UID4444)	263	507	232	3	502	2	0	0	0	99.35	0.52	0	Y
SE2454.metabat_sens.032	c__Alphaproteobacteria (UID3305)	564	349	230	2	343	4	0	0	0	99.35	0.94	0	N
SE2464.concoct.028	o__Oceanospirillales (UID4446)	43	529	233	7	511	11	0	0	0	99.35	1.48	81.82	N
SE2510.concoct.014	c__Alphaproteobacteria (UID3305)	564	349	230	2	342	5	0	0	0	99.35	1.74	80	N
SE6801.concoct.037	c__Alphaproteobacteria (UID3305)	564	349	230	3	339	7	0	0	0	99.35	1.96	71.43	N
SE6856.rosella_refined.089	c__Alphaproteobacteria (UID3305)	564	349	230	2	334	13	0	0	0	99.35	4.13	30.77	N
SE6805.concoct.031_sub	f__Rhodobacteraceae (UID3360)	56	582	313	3	577	2	0	0	0	99.34	0.34	0	Y
SE6836.metabat_sens.017	f__Rhodobacteraceae (UID3360)	56	582	313	3	575	4	0	0	0	99.34	0.43	25	N
SE6798.metabat_sens.003	o__Oceanospirillales (UID4446)	43	529	233	16	510	3	0	0	0	99.34	0.47	0	Y
SE6856.maxbin.003	f__Rhodobacteraceae (UID3360)	56	582	313	3	572	7	0	0	0	99.34	1.06	42.86	N
SE6816.metabat2_refined.163_sub	o__Rhizobiales (UID3642)	107	484	316	10	467	7	0	0	0	99.34	1.21	28.57	Y
SE6833.metabat_sens.007	o__Sphingomonadales (UID3310)	26	569	293	6	557	5	1	0	0	99.34	1.25	12.5	N
SE6864.semibin_refined.069	o__Rhizobiales (UID3447)	356	416	249	6	406	4	0	0	0	99.34	1.41	25	Y
SE2485.rosella_refined.009	c__Gammaproteobacteria (UID4444)	263	506	232	7	492	7	0	0	0	99.33	0.36	42.86	N
SE6856.maxbin.011	c__Alphaproteobacteria (UID3305)	564	349	230	3	344	2	0	0	0	99.33	0.58	0	Y
SE2454.semibin_refined.325	k__Bacteria (UID2982)	88	230	148	1	229	0	0	0	0	99.32	0	0	N
SE2473.vamb.038	k__Bacteria (UID2982)	88	230	148	1	229	0	0	0	0	99.32	0	0	Y
SE2540.concoct.015	k__Bacteria (UID2982)	88	230	148	1	228	1	0	0	0	99.32	0.68	0	N
SE2543.semibin_refined.113	k__Bacteria (UID2982)	88	230	148	1	228	1	0	0	0	99.32	0.68	100	N
SE2485.metabat_spec.003	s__algicola (UID2846)	47	571	303	3	560	8	0	0	0	99.32	1.24	0	Y
SE6798.rosella_refined.011	c__Gammaproteobacteria (UID4761)	52	693	297	3	684	6	0	0	0	99.3	0.95	66.67	N
SE6860.metabat_sens.011	f__Rhodobacteraceae (UID3356)	67	616	330	3	606	6	1	0	0	99.29	2.03	11.11	N
SE6838.maxbin.035_sub	f__Rhodobacteraceae (UID3356)	67	617	330	4	596	17	0	0	0	99.26	2.58	23.53	N
SE2477.semibin_refined.001	o__Sphingomonadales (UID3310)	26	569	293	3	565	1	0	0	0	99.25	0.17	0	N
SE2537.concoct.031	o__Sphingomonadales (UID3310)	26	569	293	3	565	1	0	0	0	99.25	0.17	0	N
SE2536.concoct.074	o__Sphingomonadales (UID3310)	26	569	293	3	564	2	0	0	0	99.25	0.18	50	N
SE2460.semibin_refined.116	o__Oceanospirillales (UID4446)	43	529	233	4	521	4	0	0	0	99.25	0.8	25	N
SE6816.semibin_refined.202	o__Rhizobiales (UID3642)	107	484	316	7	474	3	0	0	0	99.24	0.79	33.33	Y
SE6783.rosella_refined.011	c__Alphaproteobacteria (UID3422)	26	529	308	5	522	2	0	0	0	99.23	0.65	0	N
SE6844.metabat_spec.024	f__Rhodobacteraceae (UID3360)	56	582	313	4	573	5	0	0	0	99.23	1.36	60	N
SE2454.metabat2_refined.036	c__Gammaproteobacteria (UID4761)	52	693	297	4	683	6	0	0	0	99.21	1.19	16.67	Y
SE6771.semibin_refined.043	c__Alphaproteobacteria (UID3305)	564	349	230	3	345	1	0	0	0	99.2	0.22	0	N
SE2553.maxbin.083	o__Sphingomonadales (UID3310)	26	569	293	3	564	2	0	0	0	99.2	0.51	50	Y
SE2544.maxbin.007	f__Rhodobacteraceae (UID3360)	56	582	313	3	574	5	0	0	0	99.2	0.9	60	N
SE6842.semibin_refined.027	f__Rhodobacteraceae (UID3360)	56	582	313	3	574	5	0	0	0	99.2	1.14	60	N
SE2534.rosella_refined.021	o__Rhizobiales (UID3447)	356	416	249	2	409	5	0	0	0	99.2	1.15	20	Y
SE6863.metabat_sens.003	f__Rhodobacteraceae (UID3360)	56	582	313	3	572	7	0	0	0	99.2	1.32	28.57	N
SE2473.maxbin.013	f__Rhodobacteraceae (UID3360)	56	582	313	4	571	7	0	0	0	99.2	1.43	42.86	N
SE2454.maxbin.016	f__Rhodobacteraceae (UID3360)	56	582	313	3	573	5	1	0	0	99.2	1.72	25	N
SE6850.metabat_sens.001	f__Rhodobacteraceae (UID3360)	56	582	313	3	567	12	0	0	0	99.2	2.13	25	N
SE2485.semibin_refined.008_sub	c__Alphaproteobacteria (UID3422)	26	529	308	3	523	3	0	0	0	99.19	0.54	0	Y
SE2550.metabat_sens.030	k__Bacteria (UID2982)	88	229	147	2	226	1	0	0	0	99.18	0.68	0	N
SE2553.semibin_refined.213	k__Bacteria (UID2982)	88	229	147	2	226	1	0	0	0	99.18	0.68	0	Y
SE6864.semibin_refined.164_sub	f__Rhodobacteraceae (UID3356)	67	617	330	4	607	6	0	0	0	99.18	0.94	33.33	N
SE2490.metabat_spec.031	k__Bacteria (UID2982)	88	229	147	2	225	2	0	0	0	99.18	1.36	0	N
SE6803.maxbin.002	f__Rhodobacteraceae (UID3360)	56	582	313	10	566	6	0	0	0	99.16	0.92	50	N
SE6838.metabat_sens.003	f__Rhodobacteraceae (UID3360)	56	582	313	6	567	9	0	0	0	99.15	1.45	55.56	N
SE6833.concoct.002	k__Bacteria (UID1453)	901	171	117	1	166	4	0	0	0	99.15	2.23	25	Y
SE2498.rosella_refined.044	c__Gammaproteobacteria (UID4444)	263	507	232	2	504	1	0	0	0	99.14	0.43	0	Y
SE6801.maxbin.009	c__Gammaproteobacteria (UID4444)	263	507	232	2	503	2	0	0	0	99.14	0.54	50	N
SE6771.semibin_refined.001	c__Gammaproteobacteria (UID4444)	263	507	232	2	503	2	0	0	0	99.14	0.65	0	N
SE6803.maxbin.011	c__Gammaproteobacteria (UID4444)	263	507	232	2	503	2	0	0	0	99.14	0.86	0	N
SE6768.maxbin.008	c__Gammaproteobacteria (UID4444)	263	507	232	2	503	2	0	0	0	99.14	0.86	50	N
SE6805.maxbin.008	c__Gammaproteobacteria (UID4444)	263	507	232	2	502	3	0	0	0	99.14	0.9	0	N
SE6811.semibin_refined.102	c__Gammaproteobacteria (UID4444)	263	507	232	4	499	4	0	0	0	99.14	1.08	0	N
SE6833.metabat_spec.003	c__Gammaproteobacteria (UID4444)	263	507	232	3	500	4	0	0	0	99.14	1.09	50	N
SE6798.metabat_sens.016	c__Gammaproteobacteria (UID4444)	263	507	232	2	501	4	0	0	0	99.14	1.15	25	N
SE2454.vamb.069	c__Gammaproteobacteria (UID4444)	263	507	232	2	486	19	0	0	0	99.14	4.31	89.47	Y
SE6829.metabat_spec.007	f__Rhodobacteraceae (UID3375)	32	625	283	6	610	9	0	0	0	99.13	1.41	66.67	N
SE2451.rosella_refined.086	c__Gammaproteobacteria (UID4761)	52	693	297	6	680	7	0	0	0	99.12	1.63	0	N
SE6813.concoct.016	o__Oceanospirillales (UID4446)	43	529	233	3	519	7	0	0	0	99.09	1.53	57.14	N
SE6776.vamb.013	c__Gammaproteobacteria (UID4761)	52	693	297	9	680	4	0	0	0	99.08	0.62	50	N
SE2473.semibin_refined.066	c__Gammaproteobacteria (UID4444)	263	507	232	11	485	11	0	0	0	99.08	3.09	27.27	Y
SE6864.concoct.215	c__Alphaproteobacteria (UID3305)	564	349	230	7	339	3	0	0	0	99.07	0.45	66.67	Y
SE2543.maxbin.059	c__Alphaproteobacteria (UID3305)	564	349	230	7	337	5	0	0	0	99.07	1.52	0	Y
SE2553.metabat_sens.051	f__Rhodobacteraceae (UID3356)	67	617	330	5	592	19	1	0	0	99.07	3.48	22.73	N
SE6828.metabat_sens.020_sub	c__Gammaproteobacteria (UID4761)	52	693	297	25	663	5	0	0	0	99.06	0.7	40	N
SE6768.rosella_refined.040	f__Rhodobacteraceae (UID3360)	56	582	313	10	567	5	0	0	0	99.06	0.92	40	N
SE2458.concoct.078	o__Oceanospirillales (UID4446)	43	529	233	3	521	5	0	0	0	99.06	0.96	40	N
SE6864.concoct.072	f__Rhodobacteraceae (UID3360)	56	582	313	3	575	4	0	0	0	99.04	0.52	50	N
SE6798.rosella_refined.065	f__Rhodobacteraceae (UID3360)	56	582	313	6	573	3	0	0	0	99.04	0.66	0	N
SE6844.maxbin.002	f__Rhodobacteraceae (UID3360)	56	582	313	3	575	4	0	0	0	99.04	0.7	50	N
SE2464.metabat_sens.009_sub	f__Rhodobacteraceae (UID3360)	56	582	313	4	574	4	0	0	0	99.04	0.76	25	N
SE6840.metabat2_refined.010	f__Rhodobacteraceae (UID3360)	56	582	313	3	572	7	0	0	0	99.04	0.86	57.14	N
SE6783.metabat_sspec.017	c__Gammaproteobacteria (UID4761)	52	693	297	5	681	7	0	0	0	99.04	0.93	42.86	N
SE2485.maxbin.005	f__Rhodobacteraceae (UID3360)	56	582	313	3	574	5	0	0	0	99.04	1.14	0	N
SE6838.metabat_sens.001	c__Alphaproteobacteria (UID3422)	26	529	308	3	526	0	0	0	0	99.03	0	0	N
SE2506.metabat_sens.012	f__Rhodobacteraceae (UID3356)	67	617	330	6	607	4	0	0	0	99.03	0.56	0	Y
SE6792.metabat_sens.004	c__Alphaproteobacteria (UID3422)	26	529	308	3	511	15	0	0	0	99.03	2.21	0	N
SE6776.metabat_sspec.003	f__Rhodobacteraceae (UID3360)	56	582	313	7	571	4	0	0	0	99.02	0.82	0	N
SE6783.concoct.023	p__Bacteroidetes (UID2591)	364	302	202	2	300	0	0	0	0	99.01	0	0	N
SE6811.metabat_sens.034	p__Bacteroidetes (UID2591)	364	302	202	2	300	0	0	0	0	99.01	0	0	N
SE6816.metabat2_refined.118	p__Bacteroidetes (UID2591)	364	302	202	2	300	0	0	0	0	99.01	0	0	Y
SE2464.metabat2_refined.074	s__algicola (UID2846)	47	571	303	3	564	4	0	0	0	99.01	0.99	0	Y
SE6856.metabat_spec.034_sub	c__Gammaproteobacteria (UID4444)	263	507	232	8	490	7	2	0	0	99.01	1.18	23.08	N
SE2464.concoct.077	s__algicola (UID2846)	47	571	303	3	561	7	0	0	0	99.01	1.22	0	N
SE6773.concoct.001	c__Alphaproteobacteria (UID3422)	26	529	308	6	522	1	0	0	0	98.99	0.06	0	Y
SE6858.maxbin.022	f__Rhodobacteraceae (UID3356)	67	616	330	4	605	6	1	0	0	98.99	2.03	11.11	Y
SE6816.metabat_sens.005	c__Alphaproteobacteria (UID3422)	26	529	308	8	508	13	0	0	0	98.99	3.11	53.85	N
SE6808.maxbin.011	f__Rhodobacteraceae (UID3356)	67	617	330	8	607	2	0	0	0	98.98	0.45	0	N
SE6833.semibin_refined.059	c__Alphaproteobacteria (UID3337)	468	388	250	6	380	2	0	0	0	98.98	0.6	0	Y
SE6811.maxbin.028_sub	o__Oceanospirillales (UID4446)	43	529	233	5	521	3	0	0	0	98.98	0.61	33.33	N
SE6768.rosella_refined.077	f__Rhodobacteraceae (UID3360)	56	582	313	5	576	1	0	0	0	98.97	0.32	100	N
SE6801.semibin_refined.073	f__Rhodobacteraceae (UID3360)	56	582	313	6	572	4	0	0	0	98.97	0.68	50	N
SE6771.maxbin.020	f__Rhodobacteraceae (UID3360)	56	582	313	4	574	4	0	0	0	98.96	0.68	50	N
SE2543.concoct.148_sub	f__Rhodobacteraceae (UID3356)	67	617	330	6	605	6	0	0	0	98.95	1.16	66.67	N
SE6811.maxbin.068	o__Rhizobiales (UID3642)	107	484	316	7	458	19	0	0	0	98.95	3.08	31.58	N
SE6816.rosella_refined.011	c__Alphaproteobacteria (UID3305)	564	349	230	9	338	2	0	0	0	98.94	0.43	0	N
SE6853.metabat_sens.012	f__Rhodobacteraceae (UID3360)	56	582	313	4	574	4	0	0	0	98.94	0.7	50	N
SE2464.maxbin.027_sub	c__Gammaproteobacteria (UID4761)	52	693	297	14	656	23	0	0	0	98.93	2.87	56.52	N
SE2485.rosella_refined.123	c__Gammaproteobacteria (UID4444)	263	507	232	3	502	2	0	0	0	98.92	0.86	0	N
SE2543.rosella_refined.011	c__Gammaproteobacteria (UID4444)	263	507	232	3	502	2	0	0	0	98.92	0.86	0	N
SE2544.metabat_sens.012	c__Gammaproteobacteria (UID4444)	263	507	232	3	502	2	0	0	0	98.92	0.86	0	N
SE2548.semibin_refined.001	c__Gammaproteobacteria (UID4444)	263	507	232	3	502	2	0	0	0	98.92	0.86	0	N
SE2543.metabat2_refined.073	c__Gammaproteobacteria (UID4444)	263	504	231	3	498	3	0	0	0	98.92	1.3	0	Y
SE6808.metabat2_refined.006	c__Gammaproteobacteria (UID4444)	263	507	232	3	491	13	0	0	0	98.92	2.8	84.62	N
SE6853.semibin_refined.036_sub	c__Alphaproteobacteria (UID3305)	564	349	230	4	345	0	0	0	0	98.91	0	0	Y
SE2507.maxbin.008_sub	c__Alphaproteobacteria (UID3305)	564	349	230	3	339	7	0	0	0	98.91	1.43	42.86	N
SE2553.maxbin.015	f__Rhodobacteraceae (UID3360)	56	582	313	6	562	14	0	0	0	98.91	1.99	7.14	N
SE2503.metabat_spec.005_sub	c__Alphaproteobacteria (UID3305)	564	349	230	3	340	6	0	0	0	98.91	2.28	0	N
SE2485.concoct.168_sub	c__Gammaproteobacteria (UID4444)	263	507	232	11	460	36	0	0	0	98.91	7.27	88.89	N
SE6801.metabat2_refined.063	o__Oceanospirillales (UID4446)	43	529	233	11	516	2	0	0	0	98.9	0.24	50	N
SE6851.concoct.077	c__Alphaproteobacteria (UID3305)	564	349	230	5	341	3	0	0	0	98.9	0.65	33.33	N
SE2478.metabat_sens.023	f__Rhodobacteraceae (UID3360)	56	582	313	4	568	10	0	0	0	98.88	1.28	70	N
SE2550.vamb.055_sub	f__Rhodobacteraceae (UID3360)	56	582	313	7	571	4	0	0	0	98.86	0.18	25	N
SE6816.concoct.117	c__Gammaproteobacteria (UID4201)	1164	275	174	2	270	3	0	0	0	98.85	0.9	0	Y
SE6828.concoct.140	f__Rhodobacteraceae (UID3356)	67	617	330	8	604	5	0	0	0	98.84	0.83	0	N
SE2543.semibin_refined.037	p__Bacteroidetes (UID2591)	364	302	202	3	291	8	0	0	0	98.84	2.72	0	Y
SE6798.semibin_refined.020_sub	f__Rhodobacteraceae (UID3360)	56	582	313	12	545	25	0	0	0	98.84	4.34	8	N
SE2553.concoct.137	s__algicola (UID2846)	47	571	303	6	560	5	0	0	0	98.83	1.16	0	N
SE2544.semibin_refined.151	p__Cyanobacteria (UID2182)	89	544	424	6	533	5	0	0	0	98.82	1.18	80	Y
SE2544.semibin_refined.152	c__Gammaproteobacteria (UID4444)	263	504	231	4	494	6	0	0	0	98.81	1.37	0	N
SE6864.concoct.214_sub	o__Rhizobiales (UID3447)	356	416	249	3	409	4	0	0	0	98.8	1	50	Y
SE2540.metabat2_refined.034	c__Gammaproteobacteria (UID4444)	263	507	232	6	490	10	1	0	0	98.8	2.18	7.69	Y
SE6867.metabat_sens.026	o__Rhizobiales (UID3449)	345	431	258	4	414	12	1	0	0	98.8	2.29	66.67	Y
SE6858.maxbin.005	p__Proteobacteria (UID3880)	1495	261	164	2	259	0	0	0	0	98.78	0	0	Y
SE6842.vamb.018	c__Gammaproteobacteria (UID4444)	263	507	232	6	499	2	0	0	0	98.78	0.54	50	N
SE6783.metabat2_refined.056	f__Rhodobacteraceae (UID3360)	56	582	313	15	563	4	0	0	0	98.77	0.96	50	N
SE2464.maxbin.005_sub	k__Bacteria (UID2565)	2921	140	85	2	137	1	0	0	0	98.75	1.18	0	N
SE2468.metabat_sens.005	k__Bacteria (UID2565)	2921	140	85	2	137	1	0	0	0	98.75	1.18	0	N
SE2473.semibin_refined.150	k__Bacteria (UID2565)	2921	140	85	2	137	1	0	0	0	98.75	1.18	0	N
SE2534.rosella_refined.002	k__Bacteria (UID2565)	2921	140	85	2	137	1	0	0	0	98.75	1.18	0	N
SE2550.metabat2_refined.052	k__Bacteria (UID2565)	2921	140	85	2	137	1	0	0	0	98.75	1.18	0	N
SE2553.rosella_refined.009_sub	k__Bacteria (UID2565)	2921	140	85	2	137	1	0	0	0	98.75	1.18	0	Y
SE2454.metabat_sens.077	k__Bacteria (UID2565)	2921	140	85	2	136	2	0	0	0	98.75	2.35	0	N
SE2485.maxbin.012	k__Bacteria (UID2565)	2921	140	85	2	136	2	0	0	0	98.75	2.35	0	Y
SE2490.semibin_refined.038_sub	k__Bacteria (UID2565)	2921	140	85	2	136	2	0	0	0	98.75	2.35	0	N
SE2550.concoct.212_sub	k__Bacteria (UID2565)	2921	140	85	2	136	2	0	0	0	98.75	2.35	0	N
SE2553.vamb.105	k__Bacteria (UID2565)	2921	140	85	2	136	2	0	0	0	98.75	2.35	50	N
SE2454.metabat_sspec.022	k__Bacteria (UID2565)	2921	140	85	2	135	3	0	0	0	98.75	3.53	0	N
SE2457.vamb.013	k__Bacteria (UID2565)	2921	140	85	2	135	3	0	0	0	98.75	3.53	0	N
SE2473.vamb.013	k__Bacteria (UID2565)	2921	140	85	2	135	3	0	0	0	98.75	3.53	0	Y
SE2540.concoct.007	k__Bacteria (UID2565)	2921	140	85	2	135	3	0	0	0	98.75	3.53	0	N
SE2553.rosella_refined.016	k__Bacteria (UID2565)	2921	140	85	2	135	3	0	0	0	98.75	3.53	0	Y
SE2457.metabat_spec.033_sub	k__Bacteria (UID2565)	2921	140	85	2	134	4	0	0	0	98.75	4.12	0	N
SE6842.vamb.007	c__Alphaproteobacteria (UID3422)	26	529	308	6	520	3	0	0	0	98.73	0.35	0	Y
SE6773.rosella_refined.003	f__Rhodobacteraceae (UID3360)	56	582	313	5	575	2	0	0	0	98.72	0.34	0	N
SE6811.rosella_refined.009	c__Gammaproteobacteria (UID4444)	263	507	232	3	502	2	0	0	0	98.71	0.86	0	N
SE2454.rosella_refined.099	s__algicola (UID2846)	47	571	303	13	553	5	0	0	0	98.71	1.32	0	N
SE2540.metabat_sens.041	c__Alphaproteobacteria (UID3305)	564	349	230	4	344	1	0	0	0	98.7	0.22	100	N
SE2507.rosella_refined.007	c__Alphaproteobacteria (UID3422)	26	529	308	4	524	1	0	0	0	98.7	0.32	0	N
SE6838.metabat_spec.004	c__Alphaproteobacteria (UID3422)	26	529	308	4	524	1	0	0	0	98.7	0.32	0	N
SE6856.metabat2_refined.039	c__Alphaproteobacteria (UID3422)	26	529	308	4	523	2	0	0	0	98.7	0.32	0	Y
SE2506.maxbin.012_sub	c__Alphaproteobacteria (UID3422)	26	529	308	4	523	2	0	0	0	98.7	0.34	50	N
SE2473.semibin_refined.166	c__Gammaproteobacteria (UID4443)	356	451	270	4	445	2	0	0	0	98.7	0.42	0	N
SE2540.concoct.167	c__Gammaproteobacteria (UID4443)	356	451	270	4	445	2	0	0	0	98.7	0.42	0	Y
SE2550.rosella_refined.114	c__Gammaproteobacteria (UID4443)	356	451	270	4	443	4	0	0	0	98.7	0.86	50	N
SE2498.maxbin.028	c__Alphaproteobacteria (UID3422)	26	529	308	4	521	3	1	0	0	98.7	0.95	0	N
SE2461.semibin_refined.008	c__Alphaproteobacteria (UID3305)	564	349	230	4	342	3	0	0	0	98.7	1.09	0	N
SE2484.metabat_sens.015	f__Rhodobacteraceae (UID3360)	56	582	313	9	562	11	0	0	0	98.7	1.16	81.82	N
SE6864.vamb.031	c__Alphaproteobacteria (UID3422)	26	529	308	9	512	8	0	0	0	98.7	1.46	37.5	N
SE2460.metabat2_refined.057	c__Gammaproteobacteria (UID4443)	356	451	270	4	442	5	0	0	0	98.7	1.53	0	N
SE2454.semibin_refined.149	c__Alphaproteobacteria (UID3422)	26	529	308	4	515	10	0	0	0	98.7	1.81	10	Y
SE2464.concoct.043	c__Alphaproteobacteria (UID3422)	26	529	308	7	518	4	0	0	0	98.69	0.99	75	Y
SE6825.concoct.064	c__Gammaproteobacteria (UID4761)	52	693	297	11	671	11	0	0	0	98.69	1.5	45.45	N
SE6856.maxbin.045	f__Rhodobacteraceae (UID3356)	67	616	330	10	596	9	1	0	0	98.69	2.09	16.67	N
SE6810.maxbin.004	c__Alphaproteobacteria (UID3305)	564	349	230	5	343	1	0	0	0	98.68	0.22	0	N
SE2454.maxbin.026	f__Rhodobacteraceae (UID3360)	56	582	313	9	562	11	0	0	0	98.66	1.19	18.18	N
SE6867.metabat_sens.003	f__Rhodobacteraceae (UID3356)	67	617	330	10	599	8	0	0	0	98.66	1.38	37.5	N
SE2454.rosella_refined.047	k__Bacteria (UID2982)	88	230	148	2	228	0	0	0	0	98.65	0	0	Y
SE2553.concoct.044	k__Bacteria (UID2982)	88	230	148	3	227	0	0	0	0	98.65	0	0	N
SE2460.concoct.022	k__Bacteria (UID2982)	88	230	148	2	227	1	0	0	0	98.65	0.04	100	N
SE2451.vamb.027	k__Bacteria (UID2982)	88	230	148	2	227	1	0	0	0	98.65	0.68	100	N
SE6858.metabat_spec.031	f__Rhodobacteraceae (UID3356)	67	617	330	12	598	7	0	0	0	98.65	1.41	57.14	N
SE6867.metabat_sens.009_sub	c__Alphaproteobacteria (UID3305)	564	349	230	7	331	11	0	0	0	98.65	3.55	18.18	N
SE6856.metabat_sens.035	f__Rhodobacteraceae (UID3356)	67	617	330	7	607	3	0	0	0	98.63	0.48	33.33	Y
SE6851.rosella_refined.004	f__Rhodobacteraceae (UID3356)	67	617	330	10	604	3	0	0	0	98.63	0.61	66.67	N
SE2478.vamb.012	c__Gammaproteobacteria (UID4761)	52	693	297	13	672	8	0	0	0	98.63	1	62.5	N
SE6816.maxbin.004	f__Rhodobacteraceae (UID3360)	56	582	313	16	563	3	0	0	0	98.61	0.66	33.33	N
SE2454.rosella_refined.051	c__Gammaproteobacteria (UID4444)	263	504	231	9	487	8	0	0	0	98.61	2.02	0	N
SE2460.rosella_refined.080	o__Rhizobiales (UID3449)	345	431	258	6	425	0	0	0	0	98.6	0	0	Y
SE6808.semibin_refined.096	c__Alphaproteobacteria (UID3422)	26	529	308	5	523	1	0	0	0	98.59	0.11	0	N
SE6776.concoct.048_sub	f__Rhodobacteraceae (UID3356)	67	617	330	15	596	6	0	0	0	98.59	0.95	33.33	N
SE2454.metabat_sens.035_sub	o__Rhizobiales (UID3447)	356	416	249	4	404	8	0	0	0	98.59	2.54	0	N
SE2553.metabat2_refined.137	s__algicola (UID2846)	47	571	303	17	546	8	0	0	0	98.57	1.23	0	N
SE6798.rosella_refined.077	o__Oceanospirillales (UID4446)	43	529	233	8	521	0	0	0	0	98.56	0	0	Y
SE6828.metabat_spec.021	f__Rhodobacteraceae (UID3375)	32	625	283	8	607	10	0	0	0	98.56	1.2	60	N
SE2485.metabat2_refined.156_sub	s__algicola (UID2846)	47	571	303	7	547	16	1	0	0	98.56	3.01	5.26	Y
SE2543.metabat2_refined.108	c__Alphaproteobacteria (UID3422)	26	529	308	5	523	1	0	0	0	98.54	0.32	0	N
SE6773.concoct.099	f__Rhodobacteraceae (UID3360)	56	582	313	13	559	10	0	0	0	98.54	1.64	60	N
SE6798.rosella_refined.078	f__Rhodobacteraceae (UID3360)	56	582	313	20	547	15	0	0	0	98.54	2.65	40	N
SE2477.semibin_refined.047	c__Gammaproteobacteria (UID4443)	356	451	270	5	444	2	0	0	0	98.52	0.42	0	N
SE6844.vamb.008	p__Bacteroidetes (UID2591)	364	302	202	3	299	0	0	0	0	98.51	0	0	N
SE6813.vamb.004	p__Bacteroidetes (UID2591)	364	302	202	3	298	1	0	0	0	98.51	0.25	100	N
SE6773.concoct.062	c__Gammaproteobacteria (UID4444)	263	507	232	4	501	2	0	0	0	98.49	0.86	0	N
SE6776.metabat_spec.006	c__Gammaproteobacteria (UID4444)	263	507	232	4	493	10	0	0	0	98.49	1.91	20	N
SE2510.semibin_refined.033	c__Alphaproteobacteria (UID3305)	564	349	230	4	344	1	0	0	0	98.48	0.43	0	Y
SE2543.maxbin.028	c__Alphaproteobacteria (UID3422)	26	529	308	7	516	6	0	0	0	98.48	1.11	50	N
SE2460.concoct.118	c__Gammaproteobacteria (UID4444)	263	504	231	4	497	3	0	0	0	98.48	1.3	0	N
SE6836.concoct.069	c__Gammaproteobacteria (UID4444)	263	504	231	4	497	3	0	0	0	98.48	1.3	0	N
SE6798.maxbin.022	c__Alphaproteobacteria (UID3337)	468	388	250	11	373	4	0	0	0	98.47	0.64	25	N
SE6783.maxbin.005	f__Rhodobacteraceae (UID3360)	56	582	313	12	566	4	0	0	0	98.46	0.52	50	N
SE2536.concoct.031	k__Bacteria (UID2565)	2921	140	85	3	133	4	0	0	0	98.46	3.64	25	N
SE6792.rosella_refined.012	f__Rhodobacteraceae (UID3375)	32	625	283	13	605	7	0	0	0	98.45	1.04	28.57	Y
SE2506.metabat_sens.014	f__Rhodobacteraceae (UID3356)	67	617	330	9	606	2	0	0	0	98.43	0.45	0	Y
SE2544.semibin_refined.158	k__Bacteria (UID2982)	88	230	148	3	226	1	0	0	0	98.42	0.68	0	N
SE2537.rosella_refined.004	f__Rhodobacteraceae (UID3360)	56	582	313	13	563	6	0	0	0	98.42	0.78	33.33	N
SE2490.metabat2_refined.036	s__algicola (UID2846)	47	571	303	9	551	11	0	0	0	98.42	1.9	9.09	Y
SE2479.maxbin.002	o__Rhizobiales (UID3449)	345	431	258	5	425	1	0	0	0	98.41	0.39	0	N
SE2485.maxbin.003	o__Rhizobiales (UID3449)	345	431	258	5	425	1	0	0	0	98.41	0.39	0	N
SE6816.metabat_sens.032	o__Rhizobiales (UID3449)	345	431	258	5	425	1	0	0	0	98.41	0.39	0	N
SE6863.semibin_refined.050_sub	o__Rhizobiales (UID3449)	345	431	258	5	424	2	0	0	0	98.41	0.42	0	N
SE6867.metabat_sens.025	o__Rhizobiales (UID3449)	345	431	258	5	424	2	0	0	0	98.41	0.42	50	Y
SE2451.concoct.129	o__Rhizobiales (UID3449)	345	431	258	5	424	2	0	0	0	98.41	0.58	50	N
SE6801.metabat2_refined.072	f__Rhodobacteraceae (UID3360)	56	582	313	15	563	4	0	0	0	98.41	0.85	50	N
SE6864.metabat_ssens.048	o__Rhizobiales (UID3449)	345	431	258	5	423	3	0	0	0	98.41	0.9	0	N
SE6768.metabat2_refined.072	o__Oceanospirillales (UID4446)	43	529	233	10	515	4	0	0	0	98.41	0.93	50	N
SE6838.concoct.105_sub	o__Oceanospirillales (UID4446)	43	529	233	47	475	7	0	0	0	98.41	1.52	42.86	Y
SE6783.semibin_refined.001	o__Rhizobiales (UID3449)	345	431	258	5	420	6	0	0	0	98.41	2.13	0	N
SE6805.vamb.004	c__Gammaproteobacteria (UID4444)	263	507	232	9	495	3	0	0	0	98.4	0.62	0	N
SE2496.maxbin.016	c__Alphaproteobacteria (UID3305)	564	349	230	8	337	4	0	0	0	98.4	1.34	25	N
SE2553.concoct.010	o__Oceanospirillales (UID4446)	43	529	233	6	515	8	0	0	0	98.39	1.96	37.5	N
SE2553.semibin_refined.194	o__Rhizobiales (UID3447)	356	416	249	5	402	9	0	0	0	98.39	2.24	66.67	Y
SE2473.semibin_refined.104	o__Rhizobiales (UID3447)	356	416	249	6	399	10	1	0	0	98.39	3.14	23.08	N
SE2503.maxbin.006	c__Alphaproteobacteria (UID3422)	26	529	308	5	522	2	0	0	0	98.38	0.34	0	N
SE6776.semibin_refined.009	c__Alphaproteobacteria (UID3422)	26	529	308	5	522	2	0	0	0	98.38	0.65	50	N
SE2550.metabat_sspec.027_sub	f__Rhodobacteraceae (UID3356)	67	617	330	13	584	20	0	0	0	98.38	3.18	5	N
SE2451.concoct.013	s__algicola (UID2846)	47	571	303	9	558	3	1	0	0	98.37	0.99	33.33	N
SE6850.metabat_sens.025	o__Rhizobiales (UID3449)	345	431	258	6	408	17	0	0	0	98.36	3.88	94.12	N
SE2496.rosella_refined.004	c__Alphaproteobacteria (UID3422)	26	529	308	6	523	0	0	0	0	98.35	0	0	Y
SE2454.semibin_refined.329	c__Gammaproteobacteria (UID4443)	356	451	270	5	444	2	0	0	0	98.33	0.42	0	N
SE2550.metabat_spec.003	f__Rhodobacteraceae (UID3360)	56	582	313	12	564	6	0	0	0	98.33	0.72	0	N
SE6853.metabat_spec.009	c__Gammaproteobacteria (UID4444)	263	506	232	7	492	7	0	0	0	98.33	1.94	28.57	N
SE2553.metabat2_refined.103	c__Gammaproteobacteria (UID4443)	356	451	270	5	416	30	0	0	0	98.33	7.69	80	N
SE6773.semibin_refined.036	c__Alphaproteobacteria (UID3422)	26	529	308	6	521	2	0	0	0	98.3	0.35	0	N
SE6768.maxbin.020	k__Bacteria (UID3187)	2258	188	117	2	184	2	0	0	0	98.29	1.71	0	Y
SE6798.metabat_sens.050	k__Bacteria (UID3187)	2258	188	117	2	184	2	0	0	0	98.29	1.71	0	N
SE2464.maxbin.023	k__Bacteria (UID3187)	2258	188	117	2	183	3	0	0	0	98.29	1.76	0	N
SE2460.metabat_sens.001	f__Rhodobacteraceae (UID3356)	67	617	330	13	598	6	0	0	0	98.28	0.96	66.67	N
SE2540.concoct.038	s__algicola (UID2846)	47	571	303	6	559	6	0	0	0	98.27	1.82	16.67	Y
SE2454.vamb.072	o__Rhizobiales (UID3447)	356	416	249	9	402	4	1	0	0	98.27	2.01	0	Y
SE6798.concoct.107_sub	o__Oceanospirillales (UID4446)	43	529	233	28	501	0	0	0	0	98.26	0	0	N
SE2485.metabat_sens.012	c__Alphaproteobacteria (UID3305)	564	349	230	5	343	1	0	0	0	98.26	0.43	0	N
SE6863.vamb.004	c__Gammaproteobacteria (UID4274)	112	581	290	8	559	13	1	0	0	98.26	3.14	6.25	N
SE6813.metabat_sens.011_sub	c__Gammaproteobacteria (UID4761)	52	693	297	13	662	18	0	0	0	98.25	2.41	50	N
SE6863.semibin_refined.017	k__Bacteria (UID3187)	2258	188	117	4	180	4	0	0	0	98.24	2.56	0	Y
SE2473.maxbin.066	k__Bacteria (UID3187)	2258	188	117	4	179	5	0	0	0	98.24	2.62	0	N
SE6838.semibin_refined.019	k__Bacteria (UID3187)	2258	188	117	4	179	5	0	0	0	98.24	2.62	0	Y
SE6833.semibin_refined.001	k__Bacteria (UID3187)	2258	188	117	4	178	6	0	0	0	98.24	3.47	0	N
SE2457.metabat_sens.022	k__Bacteria (UID3187)	2258	188	117	4	178	6	0	0	0	98.24	3.47	16.67	N
SE6768.concoct.061	k__Bacteria (UID3187)	2258	188	117	4	178	6	0	0	0	98.24	3.47	16.67	N
SE6798.metabat_sens.011	k__Bacteria (UID3187)	2258	188	117	4	178	5	1	0	0	98.24	4.33	12.5	N
SE6801.metabat_sens.011	k__Bacteria (UID3187)	2258	188	117	4	174	10	0	0	0	98.24	5.25	50	N
SE2550.semibin_refined.146	o__Rhizobiales (UID3449)	345	431	258	11	419	1	0	0	0	98.23	0.39	0	N
SE6778.semibin_refined.005	o__Rhizobiales (UID3449)	345	431	258	6	422	3	0	0	0	98.22	0.97	33.33	N
SE2464.semibin_refined.031	k__Bacteria (UID2565)	2921	140	85	7	131	2	0	0	0	98.22	2.35	50	N
SE6788.semibin_refined.001	c__Gammaproteobacteria (UID4761)	52	693	297	10	681	2	0	0	0	98.2	0.51	0	N
SE2490.maxbin.044	o__Sphingomonadales (UID3310)	26	569	293	15	543	11	0	0	0	98.2	1.95	18.18	Y
SE2506.semibin_refined.066	o__Rhizobiales (UID3447)	356	416	249	5	410	1	0	0	0	98.19	0.2	0	Y
SE2507.semibin_refined.017	o__Rhizobiales (UID3447)	356	416	249	5	410	1	0	0	0	98.19	0.2	0	N
SE2540.semibin_refined.007	o__Rhizobiales (UID3447)	356	416	249	5	410	1	0	0	0	98.19	0.2	0	N
SE6792.concoct.069	o__Rhizobiales (UID3447)	356	416	249	5	410	1	0	0	0	98.19	0.2	0	N
SE6798.concoct.052	o__Rhizobiales (UID3447)	356	416	249	5	410	1	0	0	0	98.19	0.2	0	N
SE2473.semibin_refined.156	f__Rhodobacteraceae (UID3360)	56	582	313	9	570	3	0	0	0	98.19	0.28	0	Y
SE6768.rosella_refined.007_sub	o__Rhizobiales (UID3447)	356	416	249	5	406	5	0	0	0	98.19	0.32	80	N
SE6801.metabat_spec.010	o__Rhizobiales (UID3447)	356	416	249	5	410	1	0	0	0	98.19	0.4	100	N
SE2473.semibin_refined.031	o__Rhizobiales (UID3447)	356	416	249	5	409	2	0	0	0	98.19	0.6	0	N
SE2496.maxbin.003	o__Rhizobiales (UID3447)	356	416	249	5	406	5	0	0	0	98.19	1.2	0	N
SE2457.metabat_sens.014	o__Rhizobiales (UID3447)	356	416	249	5	404	7	0	0	0	98.19	1.69	0	N
SE2553.semibin_refined.285	o__Rhizobiales (UID3449)	345	431	258	14	414	3	0	0	0	98.18	0.59	66.67	N
SE6768.concoct.132	c__Alphaproteobacteria (UID3337)	468	388	250	9	376	3	0	0	0	98.18	1	33.33	N
SE2460.maxbin.013	c__Alphaproteobacteria (UID3337)	468	388	250	6	380	2	0	0	0	98.17	0.8	0	N
SE2543.metabat_sens.002	c__Alphaproteobacteria (UID3337)	468	388	250	6	380	2	0	0	0	98.17	0.8	0	N
SE2544.vamb.042	c__Alphaproteobacteria (UID3337)	468	388	250	6	380	2	0	0	0	98.17	0.8	0	N
SE2485.vamb.048	c__Gammaproteobacteria (UID4761)	52	693	297	10	678	5	0	0	0	98.15	0.65	20	N
SE2457.concoct.027	c__Gammaproteobacteria (UID4443)	356	451	270	6	441	4	0	0	0	98.15	0.73	25	N
SE2454.concoct.052_sub	c__Gammaproteobacteria (UID4761)	52	693	297	13	662	18	0	0	0	98.14	2.08	77.78	N
SE6867.metabat2_refined.003	f__Rhodobacteraceae (UID3360)	56	582	313	8	572	2	0	0	0	98.13	0.34	0	N
SE6798.maxbin.030_sub	c__Gammaproteobacteria (UID4444)	263	506	232	31	466	9	0	0	0	98.13	1.64	66.67	Y
SE6840.metabat_sspec.010	c__Alphaproteobacteria (UID3422)	26	529	308	9	517	3	0	0	0	98.11	0.81	66.67	N
SE6838.metabat_spec.002	f__Rhodobacteraceae (UID3356)	67	617	330	13	598	6	0	0	0	98.1	0.69	50	N
SE2457.metabat_spec.008	f__Rhodobacteraceae (UID3360)	56	582	313	8	565	8	1	0	0	98.1	1.9	36.36	N
SE2457.metabat2_refined.007	c__Gammaproteobacteria (UID4761)	52	693	297	15	667	11	0	0	0	98.09	1.55	27.27	N
SE2451.semibin_refined.021	f__Rhodobacteraceae (UID3360)	56	582	313	19	560	3	0	0	0	98.08	0.66	33.33	N
SE2553.metabat2_refined.066	k__Bacteria (UID3187)	2258	188	117	4	178	6	0	0	0	98.08	3.47	0	Y
SE6867.semibin_refined.041	c__Alphaproteobacteria (UID3305)	564	349	230	10	336	3	0	0	0	98.07	0.69	33.33	N
SE6816.rosella_refined.033	f__Rhodobacteraceae (UID3360)	56	582	313	10	572	0	0	0	0	98.05	0	0	Y
SE6773.vamb.004	c__Gammaproteobacteria (UID4444)	263	504	231	5	495	4	0	0	0	98.05	1.52	0	N
SE6850.concoct.019_sub	c__Alphaproteobacteria (UID3305)	564	349	230	5	342	2	0	0	0	98.04	0.43	0	N
SE6856.maxbin.005	p__Proteobacteria (UID3880)	1495	261	164	4	257	0	0	0	0	98.02	0	0	N
SE6860.metabat_sens.008	o__Rhizobiales (UID3449)	345	431	258	6	421	4	0	0	0	98.02	0.46	50	N
SE6801.concoct.112	k__Bacteria (UID3187)	2258	188	117	4	182	2	0	0	0	98.02	1.71	0	N
SE6793.metabat_sspec.005	c__Alphaproteobacteria (UID3337)	468	388	250	9	376	3	0	0	0	98.01	1	0	Y
SE2485.semibin_refined.088_sub	p__Proteobacteria (UID3880)	1495	261	164	7	253	1	0	0	0	98	0.03	0	Y
SE6851.rosella_refined.013	f__Rhodobacteraceae (UID3360)	56	582	313	23	552	6	0	1	0	98	2.34	16.67	Y
SE2460.rosella_refined.003	o__Rhizobiales (UID3447)	356	416	249	6	408	2	0	0	0	97.99	0.23	50	N
SE2503.metabat_sens.007_sub	o__Rhizobiales (UID3447)	356	416	249	6	407	3	0	0	0	97.99	1	0	N
SE2540.semibin_refined.148	o__Rhizobiales (UID3447)	356	416	249	6	403	7	0	0	0	97.99	2.41	0	N
SE6842.concoct.012	o__Oceanospirillales (UID4446)	43	529	233	18	493	18	0	0	0	97.99	3.78	61.11	N
SE2553.concoct.164	o__Rhizobiales (UID3449)	345	431	258	14	412	5	0	0	0	97.98	1.3	40	Y
SE2553.maxbin.074_sub	f__Rhodobacteraceae (UID3356)	67	617	330	20	591	6	0	0	0	97.98	1.33	66.67	N
SE2490.maxbin.015	f__Rhodobacteraceae (UID3360)	56	582	313	16	558	8	0	0	0	97.98	2.09	12.5	N
SE6793.semibin_refined.006	c__Alphaproteobacteria (UID3422)	26	529	308	9	518	2	0	0	0	97.97	0.65	0	N
SE2553.metabat2_refined.160	c__Alphaproteobacteria (UID3337)	468	388	250	7	379	2	0	0	0	97.97	0.8	0	Y
SE6808.semibin_refined.021_sub	c__Alphaproteobacteria (UID3337)	468	388	250	13	373	2	0	0	0	97.97	0.8	0	N
SE2451.metabat_spec.013	c__Gammaproteobacteria (UID4443)	356	451	270	6	443	2	0	0	0	97.96	0.42	0	N
SE6844.concoct.057	o__Rhizobiales (UID3449)	345	431	258	8	419	4	0	0	0	97.96	0.84	100	N
SE6864.vamb.002	f__Rhodobacteraceae (UID3361)	46	654	332	12	636	6	0	0	0	97.96	0.91	50	Y
SE2543.semibin_refined.226	c__Gammaproteobacteria (UID4267)	119	544	284	12	527	5	0	0	0	97.96	0.94	20	Y
SE6858.maxbin.002	o__Rhizobiales (UID3449)	345	431	258	7	421	3	0	0	0	97.95	0.78	66.67	N
SE2461.semibin_refined.001	o__Rhizobiales (UID3449)	345	431	258	9	418	4	0	0	0	97.95	0.83	0	N
SE2544.metabat_spec.030	f__Rhodobacteraceae (UID3356)	67	617	330	13	595	9	0	0	0	97.95	1.08	66.67	N
SE2477.vamb.010	o__Rhizobiales (UID3447)	356	416	249	11	403	2	0	0	0	97.94	0.6	0	N
SE6816.metabat2_refined.040	o__Rhizobiales (UID3447)	356	416	249	7	400	9	0	0	0	97.93	2.34	11.11	Y
SE2457.metabat_sspec.003	o__Sphingomonadales (UID3310)	26	569	293	11	551	7	0	0	0	97.92	0.82	57.14	N
SE6838.metabat2_refined.042	c__Gammaproteobacteria (UID4444)	263	504	231	6	495	3	0	0	0	97.91	1.3	0	N
SE2528.metabat_spec.001	k__Bacteria (UID1453)	901	171	117	6	160	5	0	0	0	97.91	3.42	20	N
SE6811.metabat_sspec.034	c__Alphaproteobacteria (UID3337)	468	388	250	6	378	4	0	0	0	97.9	0.78	25	Y
SE6816.maxbin.037	c__Alphaproteobacteria (UID3337)	468	388	250	6	378	4	0	0	0	97.9	0.83	0	N
SE6856.maxbin.001_sub	o__Rhizobiales (UID3449)	345	431	258	10	420	1	0	0	0	97.89	0.39	0	N
SE2543.concoct.217	f__Rhodobacteraceae (UID3361)	46	654	332	19	629	6	0	0	0	97.89	1.61	16.67	Y
SE2553.concoct.061	o__Rhizobiales (UID3449)	345	431	258	6	418	6	1	0	0	97.87	2.65	11.11	Y
SE6811.rosella_refined.098	k__Bacteria (UID2565)	2921	152	93	2	150	0	0	0	0	97.85	0	0	Y
SE2454.semibin_refined.282	c__Alphaproteobacteria (UID3422)	26	529	308	15	481	32	1	0	0	97.85	5.17	34.29	N
SE6792.rosella_refined.049	c__Alphaproteobacteria (UID3337)	468	388	250	10	376	2	0	0	0	97.84	0.6	0	N
SE2548.vamb.006	c__Gammaproteobacteria (UID4444)	263	504	231	11	489	4	0	0	0	97.84	1.31	0	N
SE6811.concoct.187	o__Rhizobiales (UID3447)	356	416	249	8	401	6	1	0	0	97.84	2.54	0	N
SE2454.metabat_sens.017	o__Rhizobiales (UID3449)	345	431	258	7	418	6	0	0	0	97.83	2.33	16.67	N
SE2451.metabat_sens.048	o__Rhizobiales (UID3449)	345	431	258	7	418	6	0	0	0	97.83	2.33	33.33	Y
SE6771.metabat_sens.015_sub	c__Alphaproteobacteria (UID3305)	564	349	230	10	337	2	0	0	0	97.81	0.43	0	N
SE6798.metabat2_refined.003	k__Bacteria (UID2495)	2993	147	91	2	145	0	0	0	0	97.8	0	0	Y
SE6801.metabat2_refined.052	k__Bacteria (UID2495)	2993	147	91	2	145	0	0	0	0	97.8	0	0	N
SE6808.maxbin.015	k__Bacteria (UID2495)	2993	147	91	2	145	0	0	0	0	97.8	0	0	N
SE6816.metabat2_refined.061	k__Bacteria (UID2495)	2993	147	91	2	145	0	0	0	0	97.8	0	0	Y
SE6816.rosella_refined.018	k__Bacteria (UID2495)	2993	147	91	2	145	0	0	0	0	97.8	0	0	Y
SE6816.semibin_refined.177	k__Bacteria (UID2495)	2993	147	91	2	145	0	0	0	0	97.8	0	0	N
SE2473.concoct.087	k__Bacteria (UID2982)	88	230	148	4	225	1	0	0	0	97.8	0.68	0	N
SE6811.semibin_refined.110	k__Bacteria (UID2495)	2993	147	91	2	144	1	0	0	0	97.8	1.1	0	N
SE6808.metabat2_refined.066	k__Bacteria (UID2495)	2993	147	91	2	144	1	0	0	0	97.8	1.1	100	Y
SE2451.metabat2_refined.040	o__Rhizobiales (UID3447)	356	416	249	6	409	1	0	0	0	97.79	0.2	0	N
SE2473.concoct.052	o__Rhizobiales (UID3447)	356	416	249	7	408	1	0	0	0	97.79	0.2	0	Y
SE2544.metabat_sspec.006	c__Gammaproteobacteria (UID4443)	356	451	270	7	441	3	0	0	0	97.78	0.44	33.33	N
SE6776.metabat_sens.003	c__Alphaproteobacteria (UID3422)	26	529	308	11	515	3	0	0	0	97.78	0.76	0	N
SE6842.semibin_refined.046	p__Bacteroidetes (UID2591)	364	302	202	6	294	2	0	0	0	97.77	0.52	50	N
SE6811.metabat_sens.002	f__Rhodobacteraceae (UID3360)	56	582	313	20	558	4	0	0	0	97.77	0.82	25	N
SE2548.metabat2_refined.045	f__Rhodobacteraceae (UID3360)	56	582	313	19	556	7	0	0	0	97.76	1.14	57.14	N
SE2522.metabat_spec.004	f__Rhodobacteraceae (UID3361)	46	654	332	13	634	7	0	0	0	97.75	1.42	42.86	Y
SE2553.rosella_refined.030	c__Alphaproteobacteria (UID3305)	564	349	230	8	336	5	0	0	0	97.75	1.74	0	Y
SE6768.rosella_refined.078	f__Rhodobacteraceae (UID3360)	56	582	313	17	560	5	0	0	0	97.73	0.67	20	Y
SE2457.metabat_sens.046_sub	f__Rhodobacteraceae (UID3356)	67	617	330	12	592	13	0	0	0	97.73	2.02	46.15	Y
SE6808.semibin_refined.027	k__Bacteria (UID2565)	2921	143	88	2	138	3	0	0	0	97.73	2.34	66.67	Y
SE6811.metabat2_refined.051	k__Bacteria (UID2569)	434	278	186	12	265	1	0	0	0	97.72	0.54	0	Y
SE2543.semibin_refined.046	o__Rhizobiales (UID3447)	356	416	249	7	401	8	0	0	0	97.72	1.88	0	Y
SE6816.rosella_refined.029	o__Rhizobiales (UID3447)	356	416	249	8	403	4	1	0	0	97.72	1.94	0	N
SE6836.semibin_refined.028	f__Rhodobacteraceae (UID3356)	67	617	330	27	580	10	0	0	0	97.71	1.57	20	N
SE6864.rosella_refined.005	o__Rhizobiales (UID3447)	356	416	249	8	401	6	1	0	0	97.71	2.04	33.33	Y
SE6816.vamb.085	k__Bacteria (UID2565)	2921	142	87	2	140	0	0	0	0	97.7	0	0	Y
SE6768.concoct.093	c__Alphaproteobacteria (UID3422)	26	529	308	18	495	13	2	0	1	97.7	3.78	41.38	N
SE2536.metabat_sens.024	c__Alphaproteobacteria (UID3422)	26	529	308	24	487	18	0	0	0	97.69	3.2	16.67	N
SE6867.concoct.034_sub	f__Rhodobacteraceae (UID3361)	46	654	332	20	627	7	0	0	0	97.68	0.8	42.86	N
SE6776.metabat2_refined.043	c__Alphaproteobacteria (UID3337)	468	388	250	8	379	1	0	0	0	97.67	0.4	0	N
SE6793.maxbin.001	c__Alphaproteobacteria (UID3337)	468	388	250	8	379	1	0	0	0	97.67	0.4	0	Y
SE2534.metabat2_refined.005	f__Rhodobacteraceae (UID3361)	46	654	332	22	619	13	0	0	0	97.67	1.66	38.46	Y
SE2473.vamb.043	o__Sphingomonadales (UID3310)	26	569	293	10	558	1	0	0	0	97.66	0.01	100	Y
SE6836.metabat2_refined.012_sub	o__Rhizobiales (UID3449)	345	431	258	12	417	2	0	0	0	97.66	0.06	100	Y
SE6842.concoct.101	k__Bacteria (UID2565)	2921	143	88	3	139	1	0	0	0	97.66	0.57	0	N
SE2485.vamb.027	p__Bacteroidetes (UID2591)	364	302	202	6	295	1	0	0	0	97.65	0.25	0	N
SE2473.concoct.099	o__Rhizobiales (UID3449)	345	431	258	7	421	3	0	0	0	97.64	0.61	33.33	N
SE2460.semibin_refined.114	o__Rhizobiales (UID3449)	345	431	258	7	422	2	0	0	0	97.64	0.78	50	N
SE2543.vamb.122	o__Rhizobiales (UID3449)	345	431	258	9	417	5	0	0	0	97.64	1.55	60	N
SE6816.rosella_refined.001	k__Bacteria (UID2565)	2921	142	87	3	139	0	0	0	0	97.63	0	0	Y
SE6838.metabat2_refined.019	c__Alphaproteobacteria (UID3337)	468	388	250	9	374	5	0	0	0	97.63	1.6	60	N
SE2490.concoct.072_sub	f__Rhodobacteraceae (UID3360)	56	582	313	25	553	4	0	0	0	97.62	0.36	50	N
SE6844.metabat2_refined.006	c__Alphaproteobacteria (UID3305)	564	349	230	13	332	4	0	0	0	97.62	0.91	25	N
SE2553.metabat2_refined.052	c__Gammaproteobacteria (UID4444)	263	506	232	10	487	9	0	0	0	97.62	1.67	44.44	N
SE2537.concoct.065	o__Rhizobiales (UID3447)	356	416	249	7	407	2	0	0	0	97.59	0.23	50	N
SE6811.concoct.143_sub	c__Alphaproteobacteria (UID3305)	564	349	230	7	337	5	0	0	0	97.59	1.52	0	N
SE2540.rosella_refined.111	s__algicola (UID2846)	47	571	303	9	560	2	0	0	0	97.58	0.33	50	Y
SE2510.metabat_sspec.011	k__Bacteria (UID2565)	2921	140	85	3	136	1	0	0	0	97.58	1.18	0	N
SE6842.semibin_refined.008	c__Alphaproteobacteria (UID3422)	26	529	308	12	511	6	0	0	0	97.58	1.63	50	N
SE2454.maxbin.119	o__Rhizobiales (UID3447)	356	416	249	7	402	7	0	0	0	97.58	2.21	0	N
SE6844.metabat2_refined.001	f__Rhodobacteraceae (UID3361)	46	654	332	16	618	20	0	0	0	97.58	3.49	55	N
SE2451.vamb.018	k__Bacteria (UID2565)	2921	140	85	3	133	4	0	0	0	97.58	3.6	0	N
SE6836.maxbin.015_sub	f__Rhodobacteraceae (UID3360)	56	582	313	27	548	7	0	0	0	97.57	1	14.29	Y
SE6820.vamb.001	c__Alphaproteobacteria (UID3337)	468	388	250	8	376	4	0	0	0	97.57	1.03	75	N
SE2540.metabat_sens.008_sub	c__Alphaproteobacteria (UID3422)	26	529	308	27	483	17	2	0	0	97.57	4.4	21.74	N
SE6838.rosella_refined.054	f__Rhodobacteraceae (UID3340)	84	568	330	13	552	3	0	0	0	97.55	0.52	0	Y
SE6864.maxbin.087	o__Rhizobiales (UID3447)	356	416	249	8	404	4	0	0	0	97.55	0.63	50	Y
SE6864.metabat_spec.024	c__Alphaproteobacteria (UID3305)	564	349	230	11	331	7	0	0	0	97.55	1.46	42.86	N
SE2543.vamb.052	f__Rhodobacteraceae (UID3356)	67	617	330	18	596	3	0	0	0	97.54	0.76	0	Y
SE6792.metabat_spec.001	o__Sphingomonadales (UID3310)	26	569	293	14	548	7	0	0	0	97.54	0.81	14.29	N
SE6813.metabat_sens.037	o__Rhizobiales (UID3449)	345	431	258	8	419	4	0	0	0	97.54	0.98	50	N
SE2550.metabat2_refined.065_sub	f__Rhodobacteraceae (UID3356)	67	617	330	27	587	3	0	0	0	97.53	0.31	0	Y
SE6773.maxbin.011_sub	c__Gammaproteobacteria (UID4444)	263	507	232	16	483	8	0	0	0	97.53	1.51	12.5	N
SE6784.metabat2_refined.012	p__Bacteroidetes (UID2591)	364	302	202	5	296	1	0	0	0	97.52	0.5	0	N
SE2536.vamb.004	o__Rhizobiales (UID3447)	356	416	249	9	403	4	0	0	0	97.52	1	0	Y
SE6816.metabat2_refined.121	f__Rhodobacteraceae (UID3361)	46	654	332	17	611	23	3	0	0	97.5	4.87	6.25	Y
SE6833.metabat_spec.010	f__Rhodobacteraceae (UID3356)	67	616	330	26	580	9	1	0	0	97.49	2.21	66.67	N
SE2458.metabat_spec.023	f__Rhodobacteraceae (UID3356)	67	617	330	16	595	6	0	0	0	97.47	0.91	16.67	N
SE2522.concoct.006	f__Rhodobacteraceae (UID3360)	56	582	313	26	548	8	0	0	0	97.46	1.93	12.5	N
SE6858.metabat_spec.010	c__Alphaproteobacteria (UID3305)	564	349	230	10	337	2	0	0	0	97.45	0.58	50	N
SE6834.metabat_sspec.011	k__Bacteria (UID3187)	2258	188	117	3	184	1	0	0	0	97.44	0.85	0	N
SE2454.vamb.118	k__Bacteria (UID3187)	2258	188	117	3	183	2	0	0	0	97.44	1.71	0	N
SE6864.metabat2_refined.122	c__Gammaproteobacteria (UID4267)	119	544	284	13	523	7	1	0	0	97.43	2.08	0	Y
SE2543.semibin_refined.129	c__Deltaproteobacteria (UID3216)	83	247	155	4	234	9	0	0	0	97.42	4.39	11.11	Y
SE6801.metabat_spec.052	c__Gammaproteobacteria (UID4761)	52	693	297	26	657	9	1	0	0	97.41	0.84	75	N
SE6840.semibin_refined.028	c__Alphaproteobacteria (UID3422)	26	529	308	12	512	5	0	0	0	97.41	1.17	40	N
SE6810.concoct.081	c__Alphaproteobacteria (UID3422)	26	529	308	16	509	4	0	0	0	97.39	0.92	0	N
SE2464.semibin_refined.052	c__Alphaproteobacteria (UID3422)	26	529	308	17	505	7	0	0	0	97.39	1.27	42.86	N
SE2510.semibin_refined.006	c__Gammaproteobacteria (UID4267)	119	544	284	15	494	33	2	0	0	97.38	7.31	0	N
SE6811.metabat_sspec.003	f__Rhodobacteraceae (UID3360)	56	582	313	16	566	0	0	0	0	97.37	0	0	N
SE6838.metabat_spec.015	c__Alphaproteobacteria (UID3305)	564	349	230	9	333	7	0	0	0	97.36	2.54	28.57	N
SE2543.metabat2_refined.123	c__Gammaproteobacteria (UID4267)	119	544	284	10	524	7	3	0	0	97.36	3.46	0	Y
SE2498.metabat_sspec.017	k__Bacteria (UID2565)	2921	143	87	4	137	2	0	0	0	97.35	2.3	0	N
SE6850.concoct.070	c__Alphaproteobacteria (UID3305)	564	349	230	10	338	1	0	0	0	97.34	0.43	100	N
SE6808.metabat_sens.007_sub	f__Rhodobacteraceae (UID3360)	56	582	313	23	554	5	0	0	0	97.34	0.79	40	N
SE6864.metabat_sens.001_sub	o__Rhizobiales (UID3449)	345	431	258	11	413	7	0	0	0	97.32	1.97	28.57	N
SE2544.rosella_refined.025	c__Alphaproteobacteria (UID3422)	26	529	308	16	512	1	0	0	0	97.31	0.32	0	N
SE6808.concoct.084_sub	f__Rhodobacteraceae (UID3360)	56	582	313	27	553	2	0	0	0	97.31	0.32	50	N
SE6816.semibin_refined.173	o__Rhizobiales (UID3449)	345	431	258	10	418	3	0	0	0	97.31	0.59	33.33	Y
SE2451.rosella_refined.089	k__Bacteria (UID2982)	88	230	148	4	225	1	0	0	0	97.3	0.68	0	N
SE2485.semibin_refined.093_sub	k__Bacteria (UID2495)	2993	147	91	7	139	1	0	0	0	97.29	0.1	100	Y
SE2454.semibin_refined.334	c__Alphaproteobacteria (UID3422)	26	529	308	37	486	6	0	0	0	97.29	1.3	50	Y
SE2454.metabat2_refined.136	c__Gammaproteobacteria (UID4444)	263	504	231	20	477	7	0	0	0	97.29	2.2	0	Y
SE2543.concoct.119	o__Rhizobiales (UID3449)	345	431	258	24	402	5	0	0	0	97.27	0.99	80	N
SE2544.concoct.152	o__Rhizobiales (UID3449)	345	431	258	14	411	6	0	0	0	97.27	1.78	50	N
SE6833.semibin_refined.082	c__Gammaproteobacteria (UID4267)	119	544	284	16	514	12	2	0	0	97.26	4.12	5.56	Y
SE6816.vamb.084	k__Bacteria (UID2495)	2993	147	91	3	144	0	0	0	0	97.25	0	0	Y
SE6833.metabat_sspec.020	c__Alphaproteobacteria (UID3305)	564	349	230	11	334	4	0	0	0	97.25	0.91	0	N
SE2460.concoct.160_sub	f__Rhodobacteraceae (UID3360)	56	582	313	22	547	13	0	0	0	97.25	1.19	100	N
SE2553.rosella_refined.200	k__Bacteria (UID2565)	2921	142	87	4	136	2	0	0	0	97.25	2.3	100	N
SE2553.metabat_sens.002_sub	c__Alphaproteobacteria (UID3422)	26	529	308	38	473	18	0	0	0	97.23	2.89	38.89	N
SE6822.metabat_sspec.003	c__Alphaproteobacteria (UID3337)	468	388	250	10	374	4	0	0	0	97.22	0.64	25	N
SE2478.concoct.059	c__Alphaproteobacteria (UID3422)	26	529	308	17	507	5	0	0	0	97.2	1.46	60	N
SE2477.concoct.090_sub	o__Rhizobiales (UID3447)	356	416	249	8	407	1	0	0	0	97.19	0.2	0	N
SE2500.vamb.004	o__Rhizobiales (UID3447)	356	416	249	9	405	2	0	0	0	97.19	0.4	0	N
SE2537.metabat_sspec.005	c__Gammaproteobacteria (UID4443)	356	451	270	10	439	2	0	0	0	97.18	0.42	0	N
SE2544.metabat_sens.028	f__Rhodobacteraceae (UID3356)	67	617	330	16	593	8	0	0	0	97.18	1.82	50	N
SE6792.semibin_refined.075	f__Rhodobacteraceae (UID3356)	67	617	330	28	587	2	0	0	0	97.16	0.45	50	Y
SE6811.metabat_sens.005	c__Alphaproteobacteria (UID3422)	26	529	308	17	504	8	0	0	0	97.14	1.41	50	N
SE2477.semibin_refined.042	c__Gammaproteobacteria (UID4761)	52	693	297	21	665	7	0	0	0	97.13	1.41	28.57	N
SE2478.semibin_refined.054	c__Gammaproteobacteria (UID4444)	263	504	231	13	483	8	0	0	0	97.13	2.77	25	N
SE6810.vamb.009	o__Rhizobiales (UID3447)	356	416	249	9	405	2	0	0	0	97.12	0.4	0	Y
SE2454.rosella_refined.053	k__Bacteria (UID2565)	2921	143	88	8	134	1	0	0	0	97.11	0.57	100	Y
SE6776.concoct.089_sub	c__Gammaproteobacteria (UID4444)	263	507	232	12	489	6	0	0	0	97.11	0.58	0	N
SE6793.metabat_sens.008	f__Rhodobacteraceae (UID3375)	32	625	283	24	594	7	0	0	0	97.1	1.05	57.14	N
SE2550.semibin_refined.157	c__Gammaproteobacteria (UID4266)	1097	270	172	5	264	1	0	0	0	97.09	0.58	0	Y
SE6833.semibin_refined.036	c__Alphaproteobacteria (UID3422)	26	529	308	13	509	7	0	0	0	97.08	1.13	85.71	N
SE6864.metabat_sspec.003	o__Rhizobiales (UID3447)	356	416	249	12	395	9	0	0	0	97.07	1.9	11.11	N
SE6768.metabat_sens.018	f__Rhodobacteraceae (UID3356)	67	616	330	21	584	9	2	0	0	97.06	2.38	40	Y
SE2468.vamb.002	o__Rhizobiales (UID3449)	345	431	258	11	415	5	0	0	0	97.04	0.85	0	N
SE2544.rosella_refined.053_sub	c__Alphaproteobacteria (UID3422)	26	529	308	19	503	7	0	0	0	97.04	0.91	42.86	N
SE6773.rosella_refined.063	f__Rhodobacteraceae (UID3356)	67	617	330	15	600	2	0	0	0	97.01	0.45	50	N
SE2485.concoct.120	f__Rhodobacteraceae (UID3356)	67	617	330	25	585	7	0	0	0	97.01	1.35	28.57	Y
SE6836.rosella_refined.006	c__Alphaproteobacteria (UID3305)	564	349	230	10	328	11	0	0	0	97.01	1.96	45.45	N
SE6792.vamb.005	k__Bacteria (UID3187)	2258	188	117	6	175	7	0	0	0	97.01	5.13	0	Y
SE2517.metabat2_refined.010	f__Rhodobacteraceae (UID3360)	56	582	313	17	535	30	0	0	0	97.01	5.43	16.67	N
SE2522.semibin_refined.009	c__Alphaproteobacteria (UID3337)	468	388	250	8	373	7	0	0	0	97	0.2	0	N
SE2490.concoct.042	c__Alphaproteobacteria (UID3422)	26	529	308	15	509	5	0	0	0	97	0.59	20	N
SE2544.vamb.031	k__Bacteria (UID2565)	2921	143	88	9	133	1	0	0	0	97	1.14	0	N
SE2543.metabat2_refined.117	o__Rhizobiales (UID3447)	356	416	249	9	405	2	0	0	0	96.99	0.21	50	N
SE2485.rosella_refined.001	k__Bacteria (UID2565)	2921	140	85	5	134	1	0	0	0	96.99	1.18	0	N
SE2451.vamb.019	c__Alphaproteobacteria (UID3305)	564	349	230	12	335	2	0	0	0	96.98	0.65	50	N
SE2473.maxbin.008_sub	c__Alphaproteobacteria (UID3422)	26	529	308	36	487	5	1	0	0	96.96	1.13	50	N
SE2543.semibin_refined.151	f__Rhodobacteraceae (UID3356)	67	617	330	36	579	1	1	0	0	96.95	0.42	25	N
SE6833.metabat_sspec.009	f__Rhodobacteraceae (UID3340)	84	568	330	13	547	8	0	0	0	96.95	1.82	50	N
SE2534.rosella_refined.022	p__Proteobacteria (UID3880)	1495	261	164	7	251	3	0	0	0	96.95	1.83	0	N
SE2534.metabat2_refined.030_sub	p__Proteobacteria (UID3880)	1495	261	164	8	249	4	0	0	0	96.95	2.44	0	N
SE6844.metabat_sens.023	f__Rhodobacteraceae (UID3375)	32	625	283	24	548	51	2	0	0	96.95	9.26	47.37	N
SE6851.rosella_refined.005	c__Alphaproteobacteria (UID3305)	564	349	230	14	333	2	0	0	0	96.94	0.65	50	N
SE2506.rosella_refined.038	c__Alphaproteobacteria (UID3422)	26	529	308	21	504	4	0	0	0	96.91	0.6	25	Y
SE6856.vamb.009	o__Rhizobiales (UID3447)	356	416	249	11	399	6	0	0	0	96.91	1.32	33.33	Y
SE2454.semibin_refined.352	f__Rhodobacteraceae (UID3360)	56	582	313	38	535	7	2	0	0	96.91	1.8	53.85	N
SE6864.metabat2_refined.202_sub	o__Rhizobiales (UID3447)	356	416	249	15	395	4	2	0	0	96.91	2.38	20	Y
SE2460.rosella_refined.092	c__Alphaproteobacteria (UID3305)	564	349	230	32	316	1	0	0	0	96.88	0.22	0	Y
SE2454.metabat_spec.012	f__Rhodobacteraceae (UID3356)	67	617	330	26	582	9	0	0	0	96.88	1.88	44.44	Y
SE6773.metabat2_refined.048	c__Alphaproteobacteria (UID3337)	468	388	250	11	376	1	0	0	0	96.87	0.4	0	N
SE6816.vamb.072_sub	o__Rhizobiales (UID3447)	356	416	249	21	392	3	0	0	0	96.87	1.2	66.67	N
SE2454.maxbin.053_sub	c__Gammaproteobacteria (UID4444)	263	507	232	30	448	29	0	0	0	96.87	6.45	0	N
SE2451.vamb.012	o__Sphingomonadales (UID3310)	26	569	293	14	555	0	0	0	0	96.86	0	0	N
SE2506.vamb.002	c__Gammaproteobacteria (UID4443)	356	451	270	12	434	5	0	0	0	96.85	1.22	0	Y
SE2553.semibin_refined.250	k__Bacteria (UID2982)	88	230	148	6	216	6	1	1	0	96.85	5.13	13.33	Y
SE6864.vamb.089	o__Rhizobiales (UID3447)	356	416	249	12	401	3	0	0	0	96.84	0.88	0	Y
SE2503.maxbin.012_sub	c__Gammaproteobacteria (UID4761)	52	693	297	19	659	15	0	0	0	96.81	2.99	20	N
SE6858.metabat_spec.009	c__Alphaproteobacteria (UID3305)	564	349	230	10	337	2	0	0	0	96.8	0.26	0	N
SE6811.metabat_sens.037_sub	c__Alphaproteobacteria (UID3422)	26	529	308	42	482	5	0	0	0	96.79	0.82	100	Y
SE6810.semibin_refined.026	o__Oceanospirillales (UID4446)	43	529	233	20	503	6	0	0	0	96.79	1.38	33.33	N
SE2503.concoct.028_sub	f__Rhodobacteraceae (UID3356)	67	617	330	19	585	13	0	0	0	96.79	1.8	30.77	N
SE2544.concoct.184_sub	c__Alphaproteobacteria (UID3422)	26	529	308	27	492	10	0	0	0	96.79	2.1	50	N
SE2543.concoct.244	p__Bacteroidetes (UID2591)	364	302	202	7	286	9	0	0	0	96.78	3	11.11	Y
SE6771.metabat_sspec.026_sub	c__Gammaproteobacteria (UID4444)	263	507	232	11	494	2	0	0	0	96.77	0.52	0	N
SE2454.metabat_spec.044	k__Bacteria (UID3187)	2258	188	117	7	170	11	0	0	0	96.77	5.52	36.36	N
SE2496.vamb.008	c__Alphaproteobacteria (UID3305)	564	349	230	9	340	0	0	0	0	96.74	0	0	N
SE6864.semibin_refined.142_sub	o__Rhizobiales (UID3447)	356	416	249	10	401	5	0	0	0	96.72	1.24	0	Y
SE2473.maxbin.015_sub	c__Alphaproteobacteria (UID3422)	26	529	308	41	477	11	0	0	0	96.72	2.49	27.27	Y
SE6792.metabat_sens.014	k__Bacteria (UID2495)	2993	147	91	3	144	0	0	0	0	96.7	0	0	N
SE6816.maxbin.125	o__Rhizobiales (UID3447)	356	416	249	14	398	4	0	0	0	96.7	1.03	25	Y
SE2460.metabat_spec.029	f__Rhodobacteraceae (UID3356)	67	617	330	20	587	10	0	0	0	96.7	1.93	30	N
SE6816.metabat_sens.027_sub	f__Rhodobacteraceae (UID3375)	32	625	283	19	593	13	0	0	0	96.69	2.34	30.77	Y
SE2460.maxbin.078_sub	c__Gammaproteobacteria (UID4761)	52	693	297	41	616	36	0	0	0	96.69	6.35	5.56	Y
SE2454.semibin_refined.272	k__Bacteria (UID2569)	434	278	186	7	265	6	0	0	0	96.67	1.75	33.33	Y
SE2460.concoct.006	o__Rhizobiales (UID3447)	356	416	249	18	384	13	1	0	0	96.66	4.06	37.5	N
SE2544.metabat_spec.024_sub	c__Alphaproteobacteria (UID3422)	26	529	308	54	461	14	0	0	0	96.65	2.87	50	N
SE2540.metabat_spec.004_sub	f__Rhodobacteraceae (UID3360)	56	582	313	33	484	62	3	0	0	96.63	11.14	16.9	N
SE2457.metabat_spec.005_sub	k__Bacteria (UID2982)	88	230	148	5	215	9	1	0	0	96.62	5.02	0	N
SE2454.concoct.121	o__Rhizobiales (UID3447)	356	416	249	20	388	8	0	0	0	96.61	2.07	37.5	N
SE2454.rosella_refined.090	s__algicola (UID2846)	47	571	303	24	546	1	0	0	0	96.59	0.17	0	N
SE2498.rosella_refined.038_sub	k__Bacteria (UID2982)	88	230	148	7	222	1	0	0	0	96.59	0.68	0	Y
SE2508.metabat_sspec.001	k__Bacteria (UID3187)	2258	188	117	4	182	2	0	0	0	96.58	1.71	0	N
SE6828.concoct.079	f__Rhodobacteraceae (UID3356)	67	617	330	20	589	7	1	0	0	96.58	1.88	20	N
SE6867.semibin_refined.044	k__Bacteria (UID3187)	2258	188	117	5	177	6	0	0	0	96.58	2.24	16.67	Y
SE2510.rosella_refined.035	k__Bacteria (UID3187)	2258	188	117	5	176	7	0	0	0	96.58	3.52	0	Y
SE2550.rosella_refined.086	k__Bacteria (UID1453)	901	171	117	4	155	12	0	0	0	96.58	8.37	25	Y
SE6836.concoct.036	o__Rhizobiales (UID3447)	356	416	249	11	403	2	0	0	0	96.57	0.4	50	N
SE6768.metabat_spec.055_sub	c__Alphaproteobacteria (UID3422)	26	529	308	46	479	4	0	0	0	96.56	1.08	0	N
SE6798.concoct.093_sub	f__Rhodobacteraceae (UID3360)	56	582	313	26	514	41	1	0	0	96.56	7.21	75	N
SE6856.metabat2_refined.061	f__Rhodobacteraceae (UID3356)	67	617	330	29	574	14	0	0	0	96.55	1.87	35.71	Y
SE6808.metabat_sens.002_sub	f__Rhodobacteraceae (UID3340)	84	568	330	27	531	10	0	0	0	96.55	2.07	40	N
SE6864.concoct.001	o__Rhizobiales (UID3449)	345	431	258	16	412	3	0	0	0	96.53	0.78	0	Y
SE6829.vamb.008	k__Bacteria (UID3187)	2258	188	117	6	176	6	0	0	0	96.53	3.04	0	N
SE6828.rosella_refined.048	k__Bacteria (UID2565)	2921	143	88	4	139	0	0	0	0	96.52	0	0	Y
SE2458.rosella_refined.016	o__Rhizobiales (UID3449)	345	431	258	12	414	5	0	0	0	96.51	1.21	80	N
SE2550.maxbin.086_sub	c__Gammaproteobacteria (UID4266)	1097	270	172	7	254	9	0	0	0	96.51	4.1	0	Y
SE6803.rosella_refine.16_0	o__Oceanospirillales (UID4446)	43	529	233	31	477	21	0	0	0	96.49	2.38	52.38	N
SE2451.maxbin.028	o__Rhizobiales (UID3447)	356	416	249	16	387	12	1	0	0	96.48	3.53	26.67	Y
SE2540.vamb.039	f__Rhodobacteraceae (UID3361)	46	654	332	41	609	4	0	0	0	96.47	0.94	25	Y
SE2484.metabat_sens.013	c__Gammaproteobacteria (UID4761)	52	693	297	29	646	18	0	0	0	96.42	2.76	33.33	N
SE6816.concoct.211	o__Rhizobiales (UID3447)	356	416	249	13	391	12	0	0	0	96.41	2.36	33.33	Y
SE2460.vamb.024	o__Rhizobiales (UID3449)	345	431	258	12	416	2	1	0	0	96.4	1.24	20	Y
SE2544.concoct.174_sub	k__Bacteria (UID2982)	88	230	148	7	220	3	0	0	0	96.4	1.39	33.33	N
SE6851.metabat_spec.022	f__Rhodobacteraceae (UID3360)	56	582	313	19	553	10	0	0	0	96.39	1.91	40	N
SE2468.metabat_sens.007	k__Bacteria (UID2565)	2921	142	87	5	136	1	0	0	0	96.38	0.1	0	N
SE6816.metabat_sens.001_sub	c__Alphaproteobacteria (UID3422)	26	529	308	32	490	7	0	0	0	96.38	1.47	71.43	N
SE6844.semibin_refined.025	k__Bacteria (UID2495)	2993	147	91	7	140	0	0	0	0	96.37	0	0	N
SE2464.concoct.093_sub	k__Bacteria (UID2495)	2993	147	91	7	138	2	0	0	0	96.37	1.28	100	N
SE6773.metabat_sens.047_sub	o__Rhizobiales (UID3449)	345	431	258	12	401	18	0	0	0	96.37	3.55	66.67	N
SE6863.metabat_sspec.024	p__Proteobacteria (UID3880)	1495	261	164	7	254	0	0	0	0	96.34	0	0	N
SE6864.semibin_refined.187	p__Proteobacteria (UID3880)	1495	261	164	6	255	0	0	0	0	96.34	0	0	N
SE2460.concoct.057	f__Rhodobacteraceae (UID3360)	56	582	313	27	552	3	0	0	0	96.34	0.64	100	N
SE2553.metabat_sens.001_sub	f__Rhodobacteraceae (UID3356)	67	617	330	23	580	13	1	0	0	96.34	1.82	6.25	N
SE2490.vamb.021	c__Alphaproteobacteria (UID3337)	468	388	250	16	367	5	0	0	0	96.33	1.61	20	N
SE2553.rosella_refined.215	c__Alphaproteobacteria (UID3305)	564	349	230	12	331	6	0	0	0	96.3	1.34	50	N
SE6864.metabat_sens.023	c__Alphaproteobacteria (UID3305)	564	349	230	16	329	4	0	0	0	96.3	1.45	50	N
SE2550.vamb.038	k__Bacteria (UID2565)	2921	140	85	5	131	4	0	0	0	96.29	1.5	75	Y
SE2553.vamb.067	k__Bacteria (UID2565)	2921	140	85	5	132	3	0	0	0	96.29	1.87	33.33	N
SE2454.semibin_refined.273	f__Rhodobacteraceae (UID3361)	46	654	332	32	608	14	0	0	0	96.26	2.79	42.86	N
SE6768.metabat2_refined.023	c__Gammaproteobacteria (UID4444)	263	507	232	16	480	10	1	0	0	96.25	2.19	7.69	N
SE6768.metabat2_refined.022	c__Alphaproteobacteria (UID3305)	564	349	230	15	315	19	0	0	0	96.24	6.83	94.74	N
SE2553.rosella_refined.034	c__Alphaproteobacteria (UID3422)	26	529	308	20	499	10	0	0	0	96.23	1.46	30	N
SE6864.semibin_refined.171	c__Gammaproteobacteria (UID4267)	119	544	284	17	514	10	2	1	0	96.22	4.76	0	Y
SE6805.concoct.113	o__Rhizobiales (UID3447)	356	416	249	14	399	3	0	0	0	96.21	0.33	66.67	N
SE2540.concoct.059	f__Rhodobacteraceae (UID3360)	56	582	313	24	546	11	1	0	0	96.2	2.45	50	N
SE6853.maxbin.002_sub	p__Proteobacteria (UID3880)	1495	261	164	7	254	0	0	0	0	96.19	0	0	N
SE6792.metabat2_refined.062	c__Gammaproteobacteria (UID4761)	52	693	297	27	664	2	0	0	0	96.18	0.51	0	N
SE2454.rosella_refined.270	o__Rhizobiales (UID3447)	356	416	249	16	388	11	1	0	0	96.17	2.91	7.14	N
SE6864.semibin_refined.127	o__Rhizobiales (UID3447)	356	416	249	17	393	6	0	0	0	96.16	1.94	0	Y
SE2451.metabat_sens.002	c__Alphaproteobacteria (UID3422)	26	529	308	27	490	12	0	0	0	96.16	2.31	50	N
SE2473.semibin_refined.164	c__Alphaproteobacteria (UID3422)	26	529	308	17	505	7	0	0	0	96.15	1.38	14.29	Y
SE2550.semibin_refined.021	k__Bacteria (UID3187)	2258	188	117	6	174	8	0	0	0	96.15	6.27	12.5	Y
SE6833.semibin_refined.093	o__Rhizobiales (UID3447)	356	416	249	16	398	2	0	0	0	96.13	0.16	50	Y
SE6834.metabat2_refined.003	f__Rhodobacteraceae (UID3340)	84	568	330	41	514	12	0	1	0	96.13	2.88	33.33	N
SE2485.concoct.102	o__Rhizobiales (UID3447)	356	416	249	19	393	4	0	0	0	96.12	1.31	0	Y
SE2464.metabat_sspec.002	o__Rhizobiales (UID3449)	345	431	258	11	418	2	0	0	0	96.09	0.58	50	N
SE6856.semibin_refined.025	o__Oceanospirillales (UID4446)	43	529	233	68	454	7	0	0	0	96.09	1.37	42.86	Y
SE6825.concoct.040_sub	f__Rhodobacteraceae (UID3375)	32	625	283	32	584	8	1	0	0	96.06	1.14	72.73	N
SE2517.metabat2_refined.009	f__Rhodobacteraceae (UID3361)	46	654	332	23	616	15	0	0	0	96.06	2.54	66.67	N
SE6776.concoct.064	o__Oceanospirillales (UID4446)	43	529	233	39	477	13	0	0	0	96.04	2.3	53.85	N
SE2540.rosella_refined.149	c__Alphaproteobacteria (UID3337)	468	388	250	13	375	0	0	0	0	96.03	0	0	Y
SE2543.semibin_refined.168_sub	c__Alphaproteobacteria (UID3422)	26	529	308	55	468	6	0	0	0	96.03	1.06	33.33	Y
SE6816.metabat2_refined.012	o__Rhizobiales (UID3447)	356	416	249	26	376	14	0	0	0	96.02	3.85	42.86	Y
SE2553.semibin_refined.103	k__Bacteria (UID3187)	2258	188	117	10	165	13	0	0	0	96.01	3.42	69.23	Y
SE6816.metabat2_refined.101	k__Bacteria (UID2495)	2993	147	91	10	136	1	0	0	0	96	0.55	0	N
SE6805.metabat_spec.031_sub	f__Rhodobacteraceae (UID3340)	84	568	330	25	538	5	0	0	0	96	1.14	60	N
SE2543.vamb.033	k__Bacteria (UID2565)	2921	143	88	9	132	2	0	0	0	95.97	1.7	0	Y
SE6808.metabat2_refined.038	f__Rhodobacteraceae (UID3360)	56	582	313	29	550	3	0	0	0	95.94	0.7	66.67	Y
SE6816.metabat2_refined.002	f__Rhodobacteraceae (UID3340)	84	568	330	39	514	15	0	0	0	95.94	2.74	6.67	N
SE2490.rosella_refined.052	c__Gammaproteobacteria (UID4266)	1097	270	172	7	262	1	0	0	0	95.93	0.58	0	Y
SE2553.concoct.222	c__Gammaproteobacteria (UID4266)	1097	270	172	7	262	1	0	0	0	95.93	0.58	0	N
SE6783.metabat_sens.007	c__Gammaproteobacteria (UID4266)	1097	270	172	7	262	1	0	0	0	95.93	0.58	0	N
SE6816.metabat_sens.009_sub	c__Gammaproteobacteria (UID4266)	1097	270	172	7	262	1	0	0	0	95.93	0.58	0	N
SE6803.metabat2_refined.054	f__Rhodobacteraceae (UID3356)	67	615	329	16	596	3	0	0	0	95.92	0.67	0	Y
SE6816.concoct.008	f__Rhodobacteraceae (UID3356)	67	617	330	37	579	1	0	0	0	95.91	0.15	100	Y
SE6798.concoct.136	c__Gammaproteobacteria (UID4761)	52	693	297	19	661	13	0	0	0	95.89	1.99	23.08	N
SE6771.concoct.091	o__Oceanospirillales (UID4446)	43	529	233	33	486	10	0	0	0	95.89	2.05	80	N
SE2543.concoct.218	k__Bacteria (UID2565)	2921	143	88	10	133	0	0	0	0	95.87	0	0	N
SE6820.metabat_sens.008	c__Alphaproteobacteria (UID3422)	26	529	308	18	510	1	0	0	0	95.86	0.32	0	N
SE6805.maxbin.002	c__Alphaproteobacteria (UID3337)	468	388	250	15	372	1	0	0	0	95.83	0.4	0	N
SE6810.vamb.014	c__Alphaproteobacteria (UID3337)	468	388	250	15	372	1	0	0	0	95.83	0.4	0	N
SE2498.concoct.028	f__Rhodobacteraceae (UID3356)	67	617	330	42	568	7	0	0	0	95.83	1.33	28.57	Y
SE2550.concoct.175	o__Rhizobiales (UID3449)	345	431	258	27	399	5	0	0	0	95.81	1.39	100	N
SE6833.maxbin.013_sub	c__Alphaproteobacteria (UID3422)	26	529	308	48	456	24	1	0	0	95.8	6.66	59.26	N
SE6864.maxbin.096	o__Rhizobiales (UID3447)	356	416	249	11	398	7	0	0	0	95.78	1.45	57.14	Y
SE2464.vamb.023	c__Alphaproteobacteria (UID3337)	468	388	250	14	372	2	0	0	0	95.77	0.6	50	N
SE2454.vamb.099	c__Alphaproteobacteria (UID3305)	564	349	230	12	335	2	0	0	0	95.75	0.65	50	Y
SE6836.metabat2_refined.028	o__Rhizobiales (UID3447)	356	416	249	21	387	8	0	0	0	95.75	2.02	37.5	Y
SE6816.concoct.146	k__Bacteria (UID3187)	2258	188	117	6	179	3	0	0	0	95.73	1.76	0	Y
SE2454.vamb.046	k__Bacteria (UID1453)	901	171	117	6	153	12	0	0	0	95.73	5.7	8.33	Y
SE6867.semibin_refined.024	o__Rhizobiales (UID3449)	345	431	258	31	395	5	0	0	0	95.71	0.97	20	N
SE6798.metabat_spec.033_sub	c__Alphaproteobacteria (UID3422)	26	529	308	49	461	19	0	0	0	95.71	4.13	73.68	N
SE2478.maxbin.018_sub	f__Rhodobacteraceae (UID3360)	56	582	313	28	496	57	1	0	0	95.71	10.53	13.33	N
SE6768.metabat_sspec.012	f__Rhodobacteraceae (UID3356)	67	616	330	34	569	12	1	0	0	95.7	2.72	46.67	Y
SE6864.metabat_sens.025	c__Alphaproteobacteria (UID3305)	564	349	230	17	327	5	0	0	0	95.67	1.74	60	N
SE2490.rosella_refined.063	k__Bacteria (UID3187)	2258	188	117	7	176	4	1	0	0	95.67	3.1	14.29	Y
SE6850.metabat2_refined.047_sub	c__Alphaproteobacteria (UID3305)	564	349	230	19	326	4	0	0	0	95.66	1.13	75	N
SE2553.metabat_sens.049_sub	k__Bacteria (UID2565)	2921	142	87	7	131	4	0	0	0	95.66	2.47	50	Y
SE2485.metabat2_refined.127	k__Bacteria (UID1453)	901	171	117	8	162	1	0	0	0	95.63	0.85	0	Y
SE6864.maxbin.079_sub	o__Rhizobiales (UID3447)	356	416	249	37	368	11	0	0	0	95.62	3.21	27.27	Y
SE6792.maxbin.047_sub	f__Rhodobacteraceae (UID3361)	46	654	332	27	610	17	0	0	0	95.62	3.6	70.59	N
SE2479.metabat_spec.016	f__Rhodobacteraceae (UID3360)	56	582	313	18	550	14	0	0	0	95.57	2.98	50	N
SE6793.metabat_sens.011	f__Rhodobacteraceae (UID3340)	84	568	330	25	540	3	0	0	0	95.56	0.33	33.33	N
SE6768.concoct.136	c__Alphaproteobacteria (UID3305)	564	349	230	13	333	3	0	0	0	95.53	0.45	0	N
SE6811.metabat_sens.013	c__Alphaproteobacteria (UID3305)	564	349	230	13	331	5	0	0	0	95.53	0.53	0	N
SE6850.metabat2_refined.001	c__Alphaproteobacteria (UID3305)	564	349	230	17	323	9	0	0	0	95.53	2.24	55.56	Y
SE6838.rosella_refined.045	f__Rhodobacteraceae (UID3356)	67	616	330	23	589	4	0	0	0	95.52	1.06	0	Y
SE6828.concoct.024_sub	c__Gammaproteobacteria (UID4761)	52	693	297	60	624	9	0	0	0	95.51	0.98	66.67	Y
SE2543.concoct.277	k__Bacteria (UID3187)	2258	188	117	7	175	5	1	0	0	95.51	5.98	0	Y
SE6811.concoct.051	k__Bacteria (UID2495)	2993	147	91	5	140	2	0	0	0	95.5	1.47	0	N
SE2548.concoct.137	c__Alphaproteobacteria (UID3422)	26	529	308	20	502	7	0	0	0	95.49	1.81	42.86	N
SE2553.concoct.162_sub	c__Alphaproteobacteria (UID3337)	468	388	250	17	367	4	0	0	0	95.47	1.6	25	Y
SE6863.metabat_spec.003	f__Rhodobacteraceae (UID3356)	67	617	330	34	575	8	0	0	0	95.46	1.24	25	N
SE2544.rosella_refined.037	k__Bacteria (UID2565)	2921	143	88	4	139	0	0	0	0	95.45	0	0	N
SE6811.semibin_refined.071	k__Bacteria (UID2565)	2921	143	88	4	138	1	0	0	0	95.45	0.07	100	Y
SE2454.metabat2_refined.113	k__Bacteria (UID2565)	2921	143	88	4	138	1	0	0	0	95.45	0.57	0	Y
SE2460.metabat2_refined.020	k__Bacteria (UID2565)	2921	143	88	4	138	1	0	0	0	95.45	0.57	0	N
SE2540.metabat_sspec.012	k__Bacteria (UID2565)	2921	143	88	4	138	1	0	0	0	95.45	0.57	0	N
SE2451.semibin_refined.083	k__Bacteria (UID2565)	2921	143	88	4	137	2	0	0	0	95.45	1.7	0	N
SE2473.metabat_sens.021	k__Bacteria (UID2565)	2921	143	88	4	137	2	0	0	0	95.45	1.7	0	N
SE6850.semibin_refined.034	c__Gammaproteobacteria (UID4267)	119	544	284	18	515	10	1	0	0	95.45	2.54	23.08	N
SE2540.semibin_refined.001	c__Alphaproteobacteria (UID3305)	564	349	230	13	328	8	0	0	0	95.44	1.89	0	N
SE6808.metabat2_refined.033_sub	o__Rhizobiales (UID3449)	345	431	258	28	391	12	0	0	0	95.38	3.49	58.33	Y
SE6784.metabat_sens.013	o__Rhizobiales (UID3449)	345	431	258	17	404	10	0	0	0	95.37	2.38	60	N
SE6801.metabat_spec.033_sub	c__Gammaproteobacteria (UID4444)	263	506	232	46	406	50	4	0	0	95.35	11.96	61.29	N
SE2550.semibin_refined.065	k__Bacteria (UID2565)	2921	142	87	5	137	0	0	0	0	95.33	0	0	N
SE2553.vamb.082	k__Bacteria (UID2565)	2921	142	87	5	137	0	0	0	0	95.33	0	0	Y
SE2490.rosella_refined.059	f__Rhodobacteraceae (UID3356)	67	617	330	33	576	8	0	0	0	95.33	1.58	50	N
SE6833.vamb.037	c__Deltaproteobacteria (UID3216)	83	247	155	10	222	14	1	0	0	95.32	5.9	5.88	Y
SE6813.concoct.089	c__Alphaproteobacteria (UID3305)	564	349	230	14	332	3	0	0	0	95.31	0.45	0	N
SE6801.metabat_spec.020	c__Alphaproteobacteria (UID3305)	564	349	230	14	330	5	0	0	0	95.31	1.32	0	N
SE6847.semibin_refined.001	f__Rhodobacteraceae (UID3360)	56	582	313	28	546	8	0	0	0	95.28	1.72	0	N
SE6810.metabat_spec.019_sub	c__Alphaproteobacteria (UID3337)	468	388	250	21	364	3	0	0	0	95.27	1.2	0	N
SE6813.concoct.125	f__Rhodobacteraceae (UID3360)	56	582	313	34	540	8	0	0	0	95.26	1.46	62.5	N
SE2540.vamb.044_sub	o__Sphingomonadales (UID3310)	26	569	293	64	496	9	0	0	0	95.24	1.85	33.33	Y
SE6816.semibin_refined.136	o__Rhizobiales (UID3447)	356	416	249	15	398	3	0	0	0	95.22	0.62	66.67	Y
SE2457.metabat_sens.020	c__Alphaproteobacteria (UID3305)	564	349	230	14	331	4	0	0	0	95.22	0.94	0	Y
SE6805.metabat_sens.029_sub	c__Gammaproteobacteria (UID4761)	52	693	297	41	638	14	0	0	0	95.22	1.8	35.71	N
SE2550.maxbin.089	p__Cyanobacteria (UID2143)	129	471	368	22	412	36	1	0	0	95.22	7.76	15.38	Y
SE6792.metabat_sspec.009_sub	c__Alphaproteobacteria (UID3422)	26	529	308	22	499	8	0	0	0	95.19	0.72	50	Y
SE2490.vamb.022_sub	k__Bacteria (UID2495)	2993	147	91	9	135	3	0	0	0	95.18	0.75	33.33	N
SE6833.concoct.048	c__Alphaproteobacteria (UID3337)	468	388	250	14	371	3	0	0	0	95.17	0.63	33.33	N
SE6811.maxbin.027	c__Alphaproteobacteria (UID3337)	468	388	250	19	357	11	1	0	0	95.16	2.66	7.14	N
SE2454.metabat_sspec.005	k__Bacteria (UID2565)	2921	142	87	7	133	2	0	0	0	95.13	0.21	100	N
SE6851.semibin_refined.002	p__Proteobacteria (UID3880)	1495	261	164	9	249	3	0	0	0	95.12	1.25	66.67	N
SE2543.vamb.089	o__Rhizobiales (UID3447)	356	416	249	18	393	4	1	0	0	95.11	1.94	0	N
SE2460.concoct.184	f__Rhodobacteraceae (UID3361)	46	654	332	33	611	10	0	0	0	95.1	1.6	10	N
SE6798.rosella_refined.069	c__Alphaproteobacteria (UID3305)	564	349	230	14	332	3	0	0	0	95.09	0.45	0	N
SE6829.concoct.077	f__Rhodobacteraceae (UID3356)	67	617	330	32	578	6	1	0	0	95.09	1.94	33.33	N
SE2454.metabat_sens.030	f__Rhodobacteraceae (UID3361)	46	654	332	37	612	5	0	0	0	95.06	1.27	0	N
SE6842.metabat_spec.006_sub	c__Gammaproteobacteria (UID4266)	1097	270	172	15	251	4	0	0	0	95.05	2.33	25	N
SE6816.concoct.061	o__Rhizobiales (UID3449)	345	431	258	26	398	7	0	0	0	95.05	2.52	57.14	N
SE2496.concoct.056	c__Gammaproteobacteria (UID4444)	263	507	232	21	481	5	0	0	0	95.04	0.96	20	N
SE2457.metabat_spec.001	c__Alphaproteobacteria (UID3422)	26	529	308	51	471	7	0	0	0	95.03	1.52	57.14	N
SE6816.metabat2_refined.062_sub	f__Rhodobacteraceae (UID3360)	56	582	313	57	508	17	0	0	0	95.03	2.65	52.94	N
SE6811.metabat_sens.035	f__Rhodobacteraceae (UID3375)	32	625	283	33	575	17	0	0	0	95.03	3.41	35.29	N
SE2498.vamb.005	o__Rhodospirillales (UID3754)	63	336	201	15	318	3	0	0	0	94.98	1	66.67	Y
SE2536.metabat_spec.022	c__Alphaproteobacteria (UID3305)	564	349	230	18	321	10	0	0	0	94.98	3.04	50	N
SE6863.concoct.070	c__Alphaproteobacteria (UID3305)	564	349	230	19	329	1	0	0	0	94.95	0.22	0	N
SE6816.maxbin.054	k__Bacteria (UID3187)	2258	188	117	18	162	8	0	0	0	94.93	4.33	25	N
SE2473.concoct.013_sub	c__Alphaproteobacteria (UID3422)	26	529	308	49	468	12	0	0	0	94.91	2.11	25	Y
SE2490.concoct.149_sub	c__Gammaproteobacteria (UID4442)	899	312	185	15	288	9	0	0	0	94.9	1.93	0	N
SE2543.concoct.182	k__Bacteria (UID3187)	2258	188	117	7	178	3	0	0	0	94.87	1.99	0	Y
SE2454.semibin_refined.241	s__algicola (UID2846)	47	571	303	23	544	4	0	0	0	94.83	0.69	50	Y
SE6838.metabat2_refined.011_sub	f__Rhodobacteraceae (UID3360)	56	582	313	31	551	0	0	0	0	94.82	0	0	N
SE2548.metabat_sspec.014_sub	c__Alphaproteobacteria (UID3422)	26	529	308	38	429	54	8	0	0	94.82	12.1	26.92	N
SE2498.concoct.084	c__Gammaproteobacteria (UID4267)	119	544	284	25	510	8	1	0	0	94.81	2.23	45.45	N
SE6816.concoct.128	c__Alphaproteobacteria (UID3305)	564	349	230	15	330	3	1	0	0	94.79	1.12	16.67	Y
SE2460.concoct.199	f__Rhodobacteraceae (UID3360)	56	582	313	36	542	4	0	0	0	94.78	0.58	25	N
SE2451.metabat2_refined.012	o__Rhizobiales (UID3447)	356	416	249	29	381	6	0	0	0	94.78	0.9	66.67	Y
SE2522.semibin_refined.051	k__Bacteria (UID1453)	901	171	117	8	157	6	0	0	0	94.78	3.26	33.33	N
SE2544.rosella_refined.068	k__Bacteria (UID3187)	2258	188	117	9	163	15	0	1	0	94.78	11.76	4.76	N
SE2473.rosella_refined.023	c__Gammaproteobacteria (UID4266)	1097	270	172	10	256	4	0	0	0	94.77	1.74	0	Y
SE6840.semibin_refined.016_sub	o__Rhizobiales (UID3447)	356	416	249	18	392	6	0	0	0	94.75	1.28	16.67	N
SE6768.concoct.001	c__Alphaproteobacteria (UID3337)	468	388	250	19	359	9	1	0	0	94.75	2.51	16.67	N
SE6864.maxbin.048	k__Bacteria (UID3187)	2258	188	117	9	172	6	1	0	0	94.75	5.84	22.22	Y
SE2454.semibin_refined.326	c__Gammaproteobacteria (UID4266)	1097	270	172	10	254	5	1	0	0	94.73	2.47	25	Y
SE2536.concoct.052	f__Rhodobacteraceae (UID3360)	56	582	313	37	532	13	0	0	0	94.67	2.16	30.77	N
SE6808.vamb.001	c__Alphaproteobacteria (UID3305)	564	349	230	15	332	2	0	0	0	94.66	0.23	0	Y
SE6773.semibin_refined.012	f__Rhodobacteraceae (UID3356)	67	615	329	35	577	3	0	0	0	94.66	0.63	0	Y
SE2550.vamb.006	c__Alphaproteobacteria (UID3337)	468	388	250	18	362	8	0	0	0	94.64	2.2	25	N
SE6844.metabat_sens.026	c__Alphaproteobacteria (UID3422)	26	529	308	32	484	13	0	0	0	94.63	2.96	38.46	N
SE6805.metabat_spec.001	f__Rhodobacteraceae (UID3356)	67	617	330	40	563	14	0	0	0	94.62	2.87	35.71	N
SE2460.maxbin.022_sub	c__Alphaproteobacteria (UID3422)	26	529	308	27	481	21	0	0	0	94.62	4.38	47.62	N
SE6783.metabat_sens.025_sub	c__Alphaproteobacteria (UID3422)	26	529	308	37	478	14	0	0	0	94.61	2.98	50	N
SE2477.rosella_refined.033	k__Bacteria (UID2565)	2921	143	88	6	136	1	0	0	0	94.6	0.57	0	N
SE2485.vamb.036_sub	c__Gammaproteobacteria (UID4761)	52	693	297	57	621	15	0	0	0	94.59	2.17	46.67	N
SE2506.concoct.012_sub	k__Bacteria (UID2982)	88	230	148	9	218	1	1	1	0	94.59	4.05	0	N
SE2468.concoct.074	f__Rhodobacteraceae (UID3360)	56	582	313	53	517	12	0	0	0	94.58	2.37	33.33	N
SE6813.metabat_sens.022	f__Rhodobacteraceae (UID3375)	32	625	283	37	531	50	6	1	0	94.57	11.28	6.76	N
SE6808.rosella_refined.092	c__Alphaproteobacteria (UID3337)	468	388	250	17	370	1	0	0	0	94.53	0.4	0	N
SE2454.concoct.124	c__Gammaproteobacteria (UID4444)	263	506	232	28	469	9	0	0	0	94.53	1.45	44.44	Y
SE6864.maxbin.073_sub	f__Rhodobacteraceae (UID3360)	56	582	313	49	518	15	0	0	0	94.52	3.75	33.33	Y
SE2540.concoct.088_sub	c__Gammaproteobacteria (UID4444)	263	506	232	35	460	11	0	0	0	94.51	3.17	54.55	N
SE2454.semibin_refined.226	f__Rhodobacteraceae (UID3361)	46	654	332	61	583	10	0	0	0	94.5	1.88	30	Y
SE2454.semibin_refined.315	k__Bacteria (UID3187)	2258	190	119	8	179	3	0	0	0	94.49	1.73	0	Y
SE2517.concoct.022	c__Gammaproteobacteria (UID4267)	119	544	284	24	508	12	0	0	0	94.49	2.56	8.33	N
SE6801.concoct.063	f__Rhodobacteraceae (UID3356)	67	615	329	29	582	4	0	0	0	94.48	0.82	0	N
SE6850.semibin_refined.030_sub	f__Rhodobacteraceae (UID3360)	56	582	313	59	511	12	0	0	0	94.44	2.2	41.67	N
SE2490.metabat_sspec.026	k__Bacteria (UID2565)	2921	142	87	8	133	1	0	0	0	94.43	1.15	0	N
SE6833.metabat_spec.042	c__Gammaproteobacteria (UID4761)	52	693	297	48	618	27	0	0	0	94.43	4.32	66.67	N
SE6798.metabat_sens.022_sub	f__Rhodobacteraceae (UID3356)	67	617	330	30	530	51	5	1	0	94.43	9.35	18.06	N
SE6776.semibin_refined.046_sub	f__Rhodobacteraceae (UID3360)	56	582	313	33	543	6	0	0	0	94.42	0.85	33.33	N
SE2454.maxbin.111_sub	s__algicola (UID2846)	47	571	303	81	464	24	2	0	0	94.42	6.45	16.67	N
SE6853.semibin_refined.021	c__Deltaproteobacteria (UID3216)	83	247	155	11	233	3	0	0	0	94.41	1.94	0	N
SE2540.metabat_sspec.059_sub	s__algicola (UID2846)	47	571	303	27	532	12	0	0	0	94.41	2.95	41.67	N
SE6792.metabat_sspec.011	k__Bacteria (UID3187)	2258	188	117	9	173	6	0	0	0	94.39	3.04	0	N
SE2540.semibin_refined.064	k__Bacteria (UID3187)	2258	188	117	9	162	17	0	0	0	94.39	3.19	70.59	N
SE2454.concoct.128_sub	o__Rhizobiales (UID3449)	345	431	258	37	388	6	0	0	0	94.36	2.03	0	N
SE6771.semibin_refined.039	c__Gammaproteobacteria (UID4267)	119	544	284	29	509	5	1	0	0	94.3	1.35	0	Y
SE2473.semibin_refined.110	o__Rhizobiales (UID3447)	356	416	249	26	386	4	0	0	0	94.29	1	75	N
SE2477.metabat_sspec.002	c__Gammaproteobacteria (UID4444)	263	507	232	24	468	14	1	0	0	94.28	2.36	11.76	N
SE6838.semibin_refined.013	c__Alphaproteobacteria (UID3422)	26	529	308	31	490	8	0	0	0	94.27	1.47	37.5	N
SE6813.concoct.100_sub	f__Rhodobacteraceae (UID3360)	56	582	313	44	534	4	0	0	0	94.21	1.01	75	N
SE2553.concoct.238	f__Rhodobacteraceae (UID3361)	46	654	332	48	591	13	2	0	0	94.21	2.65	26.32	N
SE2454.maxbin.049	c__Gammaproteobacteria (UID4274)	112	581	290	20	542	19	0	0	0	94.2	2.09	21.05	Y
SE6838.concoct.044	o__Rhizobiales (UID3449)	345	431	258	25	395	11	0	0	0	94.2	3.01	45.45	N
SE6834.semibin_refined.029	o__Rhizobiales (UID3447)	356	416	249	23	392	1	0	0	0	94.19	0.2	0	N
SE2543.vamb.106	c__Gammaproteobacteria (UID4444)	263	507	232	30	474	3	0	0	0	94.17	0.57	33.33	N
SE2477.concoct.015_sub	k__Bacteria (UID2982)	88	230	148	12	214	4	0	0	0	94.17	2.7	50	N
SE6838.metabat2_refined.058_sub	c__Gammaproteobacteria (UID4761)	52	693	297	45	627	18	3	0	0	94.16	3.9	11.11	Y
SE2537.metabat_spec.017	c__Alphaproteobacteria (UID3305)	564	349	230	16	326	7	0	0	0	94.14	1.54	28.57	N
SE2454.rosella_refined.084	c__Gammaproteobacteria (UID4444)	263	507	232	42	459	5	1	0	0	94.14	1.95	37.5	N
SE2498.metabat2_refined.019_sub	c__Gammaproteobacteria (UID4443)	356	451	270	32	413	6	0	0	0	94.13	1.23	66.67	N
SE6805.rosella_refined.059_sub	c__Gammaproteobacteria (UID4444)	263	506	232	40	463	3	0	0	0	94.13	1.29	33.33	N
SE2500.metabat_sspec.001	c__Alphaproteobacteria (UID3422)	26	529	308	25	496	8	0	0	0	94.13	1.91	12.5	N
SE6792.semibin_refined.020_sub	f__Rhodobacteraceae (UID3356)	67	617	330	36	573	8	0	0	0	94.12	1.62	37.5	N
SE2454.concoct.236_sub	o__Rhizobiales (UID3447)	356	416	249	27	385	4	0	0	0	94.1	1.41	0	Y
SE2543.rosella_refined.150	f__Rhodobacteraceae (UID3356)	67	617	330	50	560	7	0	0	0	94.1	1.54	57.14	N
SE6798.concoct.051	f__Rhodobacteraceae (UID3356)	67	617	330	37	574	6	0	0	0	94.07	1.42	0	N
SE6858.concoct.080	c__Alphaproteobacteria (UID3305)	564	349	230	26	318	5	0	0	0	94.07	1.74	80	Y
SE6816.concoct.010	c__Alphaproteobacteria (UID3305)	564	349	230	15	329	5	0	0	0	94.07	1.96	20	Y
SE2496.metabat2_refined.023	c__Alphaproteobacteria (UID3305)	564	349	230	22	306	21	0	0	0	94.06	6.45	95.24	N
SE6793.metabat2_refined.006	k__Bacteria (UID3187)	2258	188	117	7	177	4	0	0	0	94.02	2.99	0	N
SE6808.semibin_refined.090_sub	c__Gammaproteobacteria (UID4444)	263	507	232	32	468	7	0	0	0	94.01	1.21	28.57	N
SE6833.metabat_spec.002_sub	f__Rhodobacteraceae (UID3340)	84	568	330	40	514	14	0	0	0	94.01	3.38	42.86	N
SE6768.concoct.097_sub	c__Gammaproteobacteria (UID4761)	52	693	297	66	618	9	0	0	0	93.96	1.17	22.22	N
SE6783.maxbin.008_sub	f__Rhodobacteraceae (UID3375)	32	625	283	31	568	22	4	0	0	93.95	4.71	20.59	N
SE2457.concoct.101	o__Rhizobiales (UID3447)	356	416	249	34	375	6	1	0	0	93.93	2.61	22.22	N
SE2473.semibin_refined.078	f__Rhodobacteraceae (UID3360)	56	582	313	49	525	8	0	0	0	93.91	1.92	50	Y
SE6793.metabat2_refined.012	k__Bacteria (UID3187)	2258	188	117	16	165	7	0	0	0	93.91	2.95	0	Y
SE2543.metabat2_refined.236	c__Gammaproteobacteria (UID4444)	263	507	232	48	397	61	0	1	0	93.87	10.15	16.42	N
SE6768.metabat_sens.002	o__Rhizobiales (UID3447)	356	416	249	24	388	4	0	0	0	93.86	1.34	0	N
SE6844.metabat2_refined.051	c__Alphaproteobacteria (UID3305)	564	349	230	20	321	8	0	0	0	93.86	2.28	12.5	N
SE6811.metabat2_refined.128_sub	c__Gammaproteobacteria (UID4444)	263	507	232	35	458	14	0	0	0	93.86	2.6	42.86	N
SE2543.metabat2_refined.001	c__Gammaproteobacteria (UID4443)	356	451	270	24	424	3	0	0	0	93.82	0.79	33.33	N
SE2477.metabat_spec.035	c__Alphaproteobacteria (UID3422)	26	529	308	58	450	21	0	0	0	93.82	4.38	19.05	N
SE6833.rosella_refined.083	f__Rhodobacteraceae (UID3356)	67	617	330	60	541	16	0	0	0	93.78	1.94	25	Y
SE6768.metabat_sspec.007_sub	o__Rhizobiales (UID3447)	356	416	249	26	375	15	0	0	0	93.78	3.24	40	N
SE2454.semibin_refined.286	s__algicola (UID2846)	47	571	303	64	500	6	1	0	0	93.77	1.38	33.33	N
SE6838.vamb.013_sub	o__Oceanospirillales (UID4446)	43	529	233	69	456	4	0	0	0	93.76	0.87	25	Y
SE6864.concoct.127_sub	c__Gammaproteobacteria (UID4444)	263	507	232	51	447	8	1	0	0	93.75	1.62	18.18	N
SE6842.concoct.001	c__Alphaproteobacteria (UID3337)	468	388	250	22	360	6	0	0	0	93.73	2	33.33	N
SE6816.concoct.088	f__Rhodobacteraceae (UID3360)	56	582	313	51	520	11	0	0	0	93.73	2	54.55	N
SE6783.concoct.075	c__Alphaproteobacteria (UID3305)	564	349	230	19	326	4	0	0	0	93.72	0.67	25	N
SE2553.semibin_refined.063	c__Gammaproteobacteria (UID4442)	899	312	185	14	295	3	0	0	0	93.69	0.54	0	Y
SE6840.metabat_sspec.005	c__Gammaproteobacteria (UID4444)	263	504	231	26	467	11	0	0	0	93.69	3.6	9.09	N
SE6864.concoct.031	k__Bacteria (UID3187)	2258	182	112	9	171	2	0	0	0	93.68	1.79	0	Y
SE6768.metabat_spec.012	f__Rhodobacteraceae (UID3340)	84	568	330	36	502	30	0	0	0	93.68	5.83	13.33	N
SE6773.concoct.110	f__Rhodobacteraceae (UID3360)	56	582	313	44	517	20	1	0	0	93.67	4.48	17.39	N
SE6805.semibin_refined.004_sub	f__Rhodobacteraceae (UID3360)	56	582	313	52	497	32	1	0	0	93.62	5.52	14.29	N
SE2553.metabat2_refined.095	f__Rhodobacteraceae (UID3356)	67	617	330	38	570	9	0	0	0	93.61	1.95	33.33	N
SE2544.vamb.044_sub	p__Bacteroidetes (UID2591)	364	298	198	19	268	11	0	0	0	93.6	3.37	9.09	N
SE6803.concoct.066_sub	c__Alphaproteobacteria (UID3305)	564	349	230	44	297	8	0	0	0	93.59	2.45	87.5	N
SE6833.metabat_sens.022_sub	c__Alphaproteobacteria (UID3422)	26	529	308	62	435	32	0	0	0	93.59	5.57	31.25	N
SE2553.rosella_refined.088	k__Bacteria (UID2982)	88	230	148	10	219	1	0	0	0	93.58	0.34	0	Y
SE2536.concoct.077_sub	k__Bacteria (UID2982)	88	230	148	11	218	1	0	0	0	93.58	0.68	0	N
SE6856.semibin_refined.030	f__Rhodobacteraceae (UID3356)	67	616	330	44	562	10	0	0	0	93.57	1.99	40	Y
SE6856.metabat2_refined.071	c__Gammaproteobacteria (UID4267)	119	544	284	40	483	19	2	0	0	93.56	5.25	12	N
SE6816.vamb.054	c__Alphaproteobacteria (UID3305)	564	349	230	25	322	2	0	0	0	93.55	0.87	100	Y
SE6816.metabat2_refined.065	k__Bacteria (UID3187)	2258	188	117	11	173	4	0	0	0	93.54	2.56	0	Y
SE6836.metabat_spec.016	f__Rhodobacteraceae (UID3360)	56	582	313	41	535	6	0	0	0	93.53	1.09	66.67	N
SE2485.metabat_sspec.027	c__Gammaproteobacteria (UID4443)	356	451	270	20	418	13	0	0	0	93.52	3.47	0	N
SE2553.metabat2_refined.152	c__Gammaproteobacteria (UID4443)	356	451	270	20	416	15	0	0	0	93.52	3.97	0	N
SE6801.rosella_refined.067	c__Alphaproteobacteria (UID3305)	564	349	230	20	328	1	0	0	0	93.48	0.43	0	Y
SE2550.concoct.085_sub	f__Rhodobacteraceae (UID3356)	67	617	330	45	560	12	0	0	0	93.45	2.32	50	N
SE2464.semibin_refined.093_sub	c__Gammaproteobacteria (UID4444)	263	507	232	30	470	7	0	0	0	93.44	1.54	14.29	N
SE2510.vamb.013	k__Bacteria (UID2565)	2921	142	87	8	131	3	0	0	0	93.42	2.4	33.33	N
SE2550.rosella_refined.091	c__Gammaproteobacteria (UID4266)	1097	270	172	12	256	2	0	0	0	93.41	0.62	0	N
SE6811.semibin_refined.055	c__Alphaproteobacteria (UID3305)	564	349	230	20	324	4	1	0	0	93.41	1.55	0	N
SE6773.metabat_sspec.019	k__Bacteria (UID2495)	2993	147	91	7	138	2	0	0	0	93.41	1.65	100	N
SE6828.vamb.005	k__Bacteria (UID3187)	2258	182	112	11	168	3	0	0	0	93.36	2.23	0	Y
SE2454.metabat2_refined.047_sub	k__Bacteria (UID3187)	2258	190	119	9	180	1	0	0	0	93.21	0.28	0	Y
SE2457.metabat2_refined.059	k__Bacteria (UID2565)	2921	142	87	14	126	2	0	0	0	93.2	0.45	50	N
SE2553.semibin_refined.202	f__Rhodobacteraceae (UID3356)	67	617	330	41	571	5	0	0	0	93.18	0.56	80	Y
SE2498.semibin_refined.050	c__Alphaproteobacteria (UID3305)	564	349	230	21	321	7	0	0	0	93.17	1.69	57.14	N
SE2543.vamb.017	k__Bacteria (UID3187)	2258	188	117	9	172	7	0	0	0	93.16	3.52	0	N
SE6853.metabat2_refined.011_sub	f__Rhodobacteraceae (UID3360)	56	582	313	58	507	17	0	0	0	93.16	3.6	41.18	N
SE2550.metabat_sspec.023	c__Gammaproteobacteria (UID4443)	356	451	270	21	417	13	0	0	0	93.15	3.12	0	Y
SE6842.vamb.017	f__Rhodobacteraceae (UID3375)	32	625	283	59	553	13	0	0	0	93.07	2.27	23.08	N
SE6833.metabat_sspec.021	c__Alphaproteobacteria (UID3305)	564	349	230	20	325	4	0	0	0	93.05	1.23	0	N
SE6858.metabat2_refined.029	f__Rhodobacteraceae (UID3360)	56	582	313	48	523	11	0	0	0	93.01	2.1	54.55	Y
SE6864.metabat2_refined.116	c__Deltaproteobacteria (UID3216)	83	247	155	14	228	5	0	0	0	93.01	3.23	20	Y
SE2473.concoct.211_sub	f__Rhodobacteraceae (UID3360)	56	582	313	54	514	14	0	0	0	93	3.12	28.57	N
SE6813.maxbin.007_sub	f__Rhodobacteraceae (UID3356)	67	617	330	45	558	14	0	0	0	93	3.14	64.29	N
SE2543.semibin_refined.011	c__Gammaproteobacteria (UID4444)	263	507	232	33	467	7	0	0	0	92.99	1.81	14.29	Y
SE2461.metabat_sens.018_sub	f__Rhodobacteraceae (UID3360)	56	582	313	47	506	29	0	0	0	92.96	4.8	58.62	N
SE6803.metabat_spec.022_sub	c__Alphaproteobacteria (UID3422)	26	529	308	58	426	43	2	0	0	92.96	6.98	73.47	N
SE2550.concoct.018	c__Alphaproteobacteria (UID3305)	564	349	230	19	320	10	0	0	0	92.92	3.48	30	N
SE2534.semibin_refined.025	k__Bacteria (UID2982)	88	230	148	11	217	2	0	0	0	92.91	1.01	0	N
SE2522.semibin_refined.001	k__Bacteria (UID3187)	2258	188	117	20	166	2	0	0	0	92.9	1.71	0	N
SE2458.maxbin.016	f__Rhodobacteraceae (UID3360)	56	582	313	42	526	14	0	0	0	92.9	2.6	78.57	N
SE6813.concoct.084_sub	c__Alphaproteobacteria (UID3422)	26	529	308	35	424	68	2	0	0	92.89	14.63	32.43	N
SE2544.vamb.037	c__Gammaproteobacteria (UID4444)	263	507	232	27	473	7	0	0	0	92.88	1.52	28.57	N
SE6816.rosella_refined.039	f__Rhodobacteraceae (UID3361)	46	654	332	43	604	7	0	0	0	92.86	1.08	28.57	Y
SE2510.semibin_refined.027	f__Rhodobacteraceae (UID3375)	32	625	283	40	570	15	0	0	0	92.86	2.35	66.67	N
SE2498.concoct.091	c__Alphaproteobacteria (UID3305)	564	349	230	26	316	7	0	0	0	92.78	1.63	57.14	Y
SE2485.maxbin.018	o__Oceanospirillales (UID4446)	43	529	233	44	477	8	0	0	0	92.78	1.77	87.5	N
SE2548.semibin_refined.051	o__Rhizobiales (UID3447)	356	416	249	29	383	4	0	0	0	92.76	0.85	25	Y
SE6803.metabat_spec.016	k__Bacteria (UID2495)	2993	147	91	13	134	0	0	0	0	92.74	0	0	N
SE2490.vamb.020	c__Gammaproteobacteria (UID4443)	356	451	270	24	409	18	0	0	0	92.72	3.23	33.33	N
SE6803.rosella_refined.065	c__Gammaproteobacteria (UID4266)	1097	270	172	22	247	1	0	0	0	92.7	0.58	100	Y
SE6816.concoct.029	k__Bacteria (UID2565)	2921	143	88	13	125	5	0	0	0	92.67	3.01	20	N
SE6838.concoct.013	c__Gammaproteobacteria (UID4444)	263	507	232	30	468	9	0	0	0	92.66	2.53	22.22	N
SE2458.concoct.077	c__Gammaproteobacteria (UID4444)	263	504	231	41	453	10	0	0	0	92.64	2.52	10	N
SE6836.concoct.027_sub	f__Rhodobacteraceae (UID3361)	46	654	332	53	588	13	0	0	0	92.63	1.75	46.15	N
SE6793.metabat2_refined.010	k__Bacteria (UID3187)	2258	188	117	16	166	6	0	0	0	92.61	3.47	0	N
SE6842.concoct.039	o__Oceanospirillales (UID4446)	43	529	233	42	477	10	0	0	0	92.6	1.89	50	N
SE2458.metabat_sens.025	f__Rhodobacteraceae (UID3360)	56	582	313	52	509	21	0	0	0	92.58	3.4	42.86	N
SE6792.metabat2_refined.022	c__Gammaproteobacteria (UID4267)	119	544	284	34	505	4	1	0	0	92.56	1.02	28.57	N
SE6768.maxbin.019_sub	o__Oceanospirillales (UID4446)	43	529	233	43	465	21	0	0	0	92.54	3.39	71.43	N
SE2485.concoct.131_sub	s__algicola (UID2846)	47	571	303	75	478	17	1	0	0	92.54	3.44	50	Y
SE6838.metabat_sens.033	c__Gammaproteobacteria (UID4761)	52	693	297	52	619	22	0	0	0	92.53	2.99	13.64	N
SE6768.metabat_spec.003	f__Rhodobacteraceae (UID3360)	56	582	313	48	506	27	1	0	0	92.52	4.56	40	N
SE2522.semibin_refined.055	o__Rhizobiales (UID3449)	345	431	258	30	398	3	0	0	0	92.48	0.68	33.33	N
SE6864.semibin_refined.183	c__Alphaproteobacteria (UID3305)	564	349	230	20	326	3	0	0	0	92.48	1.01	0	Y
SE6816.semibin_refined.111	k__Bacteria (UID2565)	2921	142	87	12	128	2	0	0	0	92.48	2.3	50	Y
SE2464.metabat_sens.037_sub	k__Bacteria (UID2565)	2921	142	87	10	132	0	0	0	0	92.46	0	0	N
SE2543.metabat2_refined.070_sub	k__Bacteria (UID2982)	88	230	148	16	206	8	0	0	0	92.46	3.3	25	Y
SE6842.rosella_refined.044	c__Gammaproteobacteria (UID4444)	263	507	232	28	465	14	0	0	0	92.45	2.45	7.14	Y
SE6792.maxbin.040_sub	k__Bacteria (UID2982)	88	230	148	17	203	10	0	0	0	92.45	4.99	10	N
SE6828.semibin_refined.079	f__Rhodobacteraceae (UID3361)	46	654	332	48	601	5	0	0	0	92.43	0.78	60	N
SE2550.metabat2_refined.059_sub	f__Rhodobacteraceae (UID3360)	56	582	313	68	497	17	0	0	0	92.42	3.27	41.18	N
SE6805.semibin_refined.018	c__Alphaproteobacteria (UID3422)	26	529	308	50	474	5	0	0	0	92.41	0.96	0	N
SE2490.concoct.013	s__algicola (UID2846)	47	571	303	45	510	16	0	0	0	92.41	2.99	12.5	N
SE6850.semibin_refined.007	c__Alphaproteobacteria (UID3422)	26	529	308	41	477	11	0	0	0	92.38	2.12	45.45	N
SE2517.vamb.003	p__Proteobacteria (UID3880)	1495	261	164	16	239	6	0	0	0	92.37	2.24	33.33	N
SE2460.metabat2_refined.019	k__Bacteria (UID1453)	901	171	117	14	150	7	0	0	0	92.34	4.04	42.86	N
SE6864.maxbin.052_sub	k__Bacteria (UID3187)	2258	190	119	11	166	13	0	0	0	92.34	7.99	61.54	Y
SE2553.semibin_refined.200	o__Rhizobiales (UID3449)	345	431	258	30	399	2	0	0	0	92.33	0.42	50	N
SE6801.maxbin.042_sub	o__Oceanospirillales (UID4446)	43	529	233	76	448	5	0	0	0	92.32	1.02	20	N
SE2553.maxbin.038_sub	o__Rhizobiales (UID3447)	356	416	249	39	347	29	0	1	0	92.32	7.97	8.57	N
SE2550.rosella_refined.022	k__Bacteria (UID1453)	901	171	117	9	160	2	0	0	0	92.31	1.28	0	Y
SE2485.concoct.144	c__Alphaproteobacteria (UID3305)	564	349	230	30	314	5	0	0	0	92.29	1.96	40	Y
SE2451.semibin_refined.037	k__Bacteria (UID2565)	2921	140	85	8	131	1	0	0	0	92.28	1.18	0	N
SE2454.semibin_refined.268	o__Rhizobiales (UID3447)	356	416	249	31	378	7	0	0	0	92.27	1.74	14.29	Y
SE2478.concoct.055	c__Gammaproteobacteria (UID4444)	263	506	232	35	463	8	0	0	0	92.25	1.66	12.5	N
SE2522.vamb.015	k__Archaea (UID2)	207	145	103	10	133	2	0	0	0	92.23	1.94	0	N
SE6850.metabat2_refined.049	f__Rhodobacteraceae (UID3360)	56	582	313	77	489	15	1	0	0	92.18	3.25	38.89	N
SE6811.rosella_refined.003	f__Rhodobacteraceae (UID3360)	56	582	313	64	510	8	0	0	0	92.16	1.9	50	Y
SE6867.metabat_spec.003	p__Proteobacteria (UID3880)	1495	261	164	17	239	5	0	0	0	92.14	1.86	60	N
SE6850.metabat_sens.013_sub	c__Alphaproteobacteria (UID3305)	564	349	230	33	311	5	0	0	0	92.11	1.45	40	N
SE2479.metabat_spec.018	o__Rhizobiales (UID3447)	356	416	249	28	379	9	0	0	0	92.11	2.29	44.44	N
SE2454.maxbin.004_sub	o__Sphingomonadales (UID3310)	26	569	293	47	514	8	0	0	0	92.08	1.71	37.5	N
SE6816.semibin_refined.119_sub	f__Rhodobacteraceae (UID3356)	67	616	330	80	529	7	0	0	0	92.06	1.26	42.86	Y
SE2507.concoct.026	c__Gammaproteobacteria (UID4442)	899	309	183	27	279	3	0	0	0	92.03	1.64	66.67	Y
SE2543.metabat2_refined.161	c__Deltaproteobacteria (UID3216)	83	247	155	20	219	7	1	0	0	92	3.8	0	Y
SE2510.metabat2_refined.032_sub	f__Rhodobacteraceae (UID3361)	46	654	332	61	555	36	2	0	0	91.99	6.1	16.67	N
SE6808.semibin_refined.097	c__Gammaproteobacteria (UID4266)	1097	270	172	22	242	6	0	0	0	91.98	2.12	16.67	Y
SE6801.metabat_sspec.014	f__Rhodobacteraceae (UID3356)	67	617	330	53	547	16	1	0	0	91.98	2.63	21.05	N
SE6808.metabat_sens.017	c__Alphaproteobacteria (UID3422)	26	529	308	48	467	14	0	0	0	91.98	3.11	21.43	N
SE2460.metabat2_refined.033	k__Bacteria (UID2982)	88	229	147	19	201	9	0	0	0	91.97	4.69	22.22	N
SE6856.maxbin.017_sub	f__Rhodobacteraceae (UID3360)	56	582	313	70	483	29	0	0	0	91.97	4.79	20.69	N
SE6784.metabat2_refined.031_sub	o__Rhizobiales (UID3447)	356	416	249	29	380	7	0	0	0	91.95	1.31	14.29	N
SE6864.semibin_refined.186_sub	p__Proteobacteria (UID3880)	1495	261	164	25	233	3	0	0	0	91.94	0.46	0	Y
SE2454.metabat_spec.021_sub	f__Rhodobacteraceae (UID3356)	67	617	330	54	544	19	0	0	0	91.91	2.96	57.89	N
SE6813.concoct.027	c__Gammaproteobacteria (UID4267)	119	544	284	37	496	10	1	0	0	91.86	2.99	46.15	N
SE6844.metabat_sspec.006	c__Gammaproteobacteria (UID4266)	1097	270	172	18	249	3	0	0	0	91.84	1.45	33.33	N
SE6850.metabat_sspec.003	f__Rhodobacteraceae (UID3356)	67	617	330	65	542	10	0	0	0	91.83	1.69	50	N
SE6838.concoct.078	f__Rhodobacteraceae (UID3356)	67	616	330	52	541	22	1	0	0	91.8	4.48	32	N
SE6801.semibin_refined.013_sub	f__Rhodobacteraceae (UID3360)	56	582	313	71	489	22	0	0	0	91.79	3.95	63.64	N
SE2454.metabat2_refined.089_sub	f__Rhodobacteraceae (UID3360)	56	582	313	71	495	16	0	0	0	91.76	2.22	37.5	N
SE6803.metabat_spec.008_sub	f__Rhodobacteraceae (UID3360)	56	582	313	53	508	21	0	0	0	91.76	3.69	28.57	N
SE6844.metabat_sens.020	f__Rhodobacteraceae (UID3356)	67	617	330	51	547	18	1	0	0	91.74	3.2	42.86	N
SE6811.concoct.110_sub	f__Rhodobacteraceae (UID3356)	67	616	330	61	540	14	1	0	0	91.74	3.26	35.29	N
SE6851.metabat2_refined.007	c__Gammaproteobacteria (UID4267)	119	544	284	51	481	11	1	0	0	91.71	3.52	0	N
SE6836.metabat_sens.018	o__Rhizobiales (UID3449)	345	431	258	41	370	20	0	0	0	91.71	4.54	60	N
SE6768.rosella_refine.35_0	c__Gammaproteobacteria (UID4444)	263	507	232	76	420	11	0	0	0	91.66	1.7	54.55	N
SE2479.concoct.026	c__Gammaproteobacteria (UID4761)	52	693	297	58	620	15	0	0	0	91.63	2.08	40	N
SE6844.metabat_sspec.019	f__Rhodobacteraceae (UID3356)	67	617	330	57	510	50	0	0	0	91.63	8.45	24	N
SE2454.concoct.076_sub	f__Rhodobacteraceae (UID3360)	56	582	313	58	508	15	1	0	0	91.61	2.23	38.89	N
SE6816.metabat2_refined.067_sub	f__Rhodobacteraceae (UID3356)	67	617	330	73	518	25	1	0	0	91.6	5.83	32.14	Y
SE6784.concoct.047	f__Rhodobacteraceae (UID3360)	56	582	313	48	528	6	0	0	0	91.59	1	50	N
SE2543.rosella_refined.061	k__Bacteria (UID2569)	434	277	185	24	252	1	0	0	0	91.5	0.54	0	Y
SE6833.metabat2_refined.065	k__Bacteria (UID1453)	901	171	117	19	147	5	0	0	0	91.49	2.64	20	Y
SE6829.rosella_refined.012	c__Gammaproteobacteria (UID4267)	119	544	284	34	497	11	2	0	0	91.49	3.7	0	Y
SE2454.rosella_refined.033	c__Gammaproteobacteria (UID4443)	356	451	270	27	411	13	0	0	0	91.48	3.29	0	N
SE6798.metabat2_refined.036	c__Gammaproteobacteria (UID4266)	1097	270	172	19	248	2	1	0	0	91.47	1	0	Y
SE6864.semibin_refined.160	c__Alphaproteobacteria (UID3422)	26	529	308	64	460	5	0	0	0	91.46	1.46	60	N
SE2536.metabat_spec.008	c__Alphaproteobacteria (UID3305)	564	349	230	27	321	1	0	0	0	91.45	0.43	0	N
SE2454.semibin_refined.295	c__Alphaproteobacteria (UID3422)	26	529	308	38	484	7	0	0	0	91.45	1.03	71.43	N
SE6816.maxbin.016_sub	f__Rhodobacteraceae (UID3356)	67	617	330	72	506	35	4	0	0	91.42	7.7	34.04	N
SE6847.metabat2_refined.001	c__Alphaproteobacteria (UID3305)	564	349	230	25	319	5	0	0	0	91.41	1.52	40	N
SE6864.semibin_refined.120	k__Bacteria (UID2565)	2921	152	93	9	137	6	0	0	0	91.4	5.38	0	Y
SE2454.semibin_refined.125	f__Rhodobacteraceae (UID3360)	56	582	313	78	498	6	0	0	0	91.35	1.19	66.67	Y
SE2517.maxbin.001_sub	o__Rhizobiales (UID3449)	345	431	258	42	374	15	0	0	0	91.34	3.3	46.67	N
SE2553.metabat2_refined.179_sub	k__Bacteria (UID2565)	2921	140	85	12	126	2	0	0	0	91.33	1.41	100	Y
SE6833.metabat_sspec.035	k__Bacteria (UID3187)	2258	188	117	24	163	1	0	0	0	91.31	0.85	0	N
SE6773.vamb.014	c__Deltaproteobacteria (UID3216)	83	247	155	16	225	5	1	0	0	91.29	3.39	0	N
SE6808.concoct.006_sub	o__Rhizobiales (UID3447)	356	416	249	31	381	4	0	0	0	91.28	1.07	100	N
SE6776.metabat2_refined.014	o__Rhizobiales (UID3447)	356	416	249	30	380	6	0	0	0	91.28	1.54	50	N
SE2543.concoct.120	o__Rhizobiales (UID3447)	356	416	249	37	374	5	0	0	0	91.26	0.9	60	Y
SE2550.maxbin.041	c__Gammaproteobacteria (UID4442)	899	312	185	24	275	13	0	0	0	91.26	3.71	7.69	N
SE2464.maxbin.068_sub	c__Alphaproteobacteria (UID3305)	564	349	230	50	261	35	3	0	0	91.23	14.26	4.55	N
SE2522.maxbin.032_sub	k__Bacteria (UID2570)	433	265	177	18	240	7	0	0	0	91.22	1.85	0	N
SE6816.concoct.135	k__Bacteria (UID2495)	2993	147	91	19	128	0	0	0	0	91.18	0	0	N
SE2506.concoct.067	f__Rhodobacteraceae (UID3356)	67	617	330	73	536	8	0	0	0	91.18	1.68	50	Y
SE6768.concoct.013	c__Alphaproteobacteria (UID3305)	564	349	230	32	313	3	0	1	0	91.18	2.61	22.22	Y
SE2485.semibin_refined.110	f__Rhodobacteraceae (UID3356)	67	617	330	59	545	13	0	0	0	91.16	1.84	69.23	N
SE6811.semibin_refined.036	c__Deltaproteobacteria (UID3216)	83	247	155	17	224	5	1	0	0	91.16	3.39	0	Y
SE2536.metabat_spec.025	f__Rhodobacteraceae (UID3356)	67	617	330	50	556	11	0	0	0	91.14	1.29	63.64	N
SE2553.maxbin.125	k__Bacteria (UID2565)	2921	140	85	18	115	7	0	0	0	91.12	6.06	42.86	Y
SE6864.rosella_refined.175_sub	f__Rhodobacteraceae (UID3360)	56	582	313	78	495	9	0	0	0	91.11	1.44	55.56	N
SE6783.metabat_sspec.005	c__Gammaproteobacteria (UID4267)	119	544	284	52	484	8	0	0	0	91.11	1.71	25	N
SE6864.rosella_refined.020	c__Gammaproteobacteria (UID4267)	119	544	284	35	506	2	1	0	0	91.08	0.88	0	N
SE2464.maxbin.021_sub	k__Bacteria (UID2982)	88	229	147	19	196	14	0	0	0	91.07	7.01	14.29	N
SE2553.metabat2_refined.028_sub	p__Cyanobacteria (UID2192)	79	584	458	44	521	19	0	0	0	91.05	3.38	36.84	Y
SE2553.concoct.132	k__Bacteria (UID3187)	2258	182	112	13	165	4	0	0	0	91	2.68	0	N
SE6803.semibin_refined.077	c__Alphaproteobacteria (UID3305)	564	349	230	35	313	1	0	0	0	90.99	0.22	0	N
SE2454.concoct.172	c__Deltaproteobacteria (UID3216)	83	247	155	17	223	6	1	0	0	90.97	3.6	11.11	N
SE6811.maxbin.005_sub	o__Rhizobiales (UID3447)	356	416	249	46	359	11	0	0	0	90.96	3.82	36.36	N
SE2485.semibin_refined.096	o__Rhizobiales (UID3447)	356	416	249	27	388	1	0	0	0	90.95	0.04	0	N
SE2540.semibin_refined.106_sub	f__Rhodobacteraceae (UID3360)	56	582	313	76	498	8	0	0	0	90.9	1.9	75	Y
SE6840.metabat_spec.015	f__Rhodobacteraceae (UID3340)	84	568	330	48	517	3	0	0	0	90.89	0.24	66.67	N
SE2553.semibin_refined.191	o__Sphingomonadales (UID3310)	26	569	293	52	511	6	0	0	0	90.88	1.09	83.33	Y
SE2473.metabat_spec.001	c__Gammaproteobacteria (UID4443)	356	451	270	32	400	18	1	0	0	90.88	5.2	23.81	N
SE6816.metabat2_refined.153	k__Bacteria (UID2570)	433	274	183	23	249	2	0	0	0	90.87	0.6	0	Y
SE6776.metabat_sspec.011	k__Bacteria (UID3187)	2258	188	117	13	169	6	0	0	0	90.85	3.47	0	N
SE6816.metabat2_refined.084	f__Rhodobacteraceae (UID3356)	67	616	330	53	522	38	3	0	0	90.84	5.91	27.66	N
SE2550.concoct.003_sub	c__Gammaproteobacteria (UID4444)	263	504	231	69	424	11	0	0	0	90.83	3.28	45.45	N
SE6844.maxbin.008_sub	o__Rhizobiales (UID3449)	345	431	258	44	369	18	0	0	0	90.82	3.47	50	N
SE2543.concoct.067_sub	f__Rhodobacteraceae (UID3356)	67	617	330	59	507	42	8	1	0	90.82	7.8	36.11	N
SE2498.metabat2_refined.042	c__Alphaproteobacteria (UID3305)	564	349	230	41	301	7	0	0	0	90.8	2.7	42.86	N
SE6842.metabat_spec.013	f__Rhodobacteraceae (UID3375)	32	625	283	59	538	27	1	0	0	90.79	5.87	36.67	N
SE2451.maxbin.031	p__Proteobacteria (UID3214)	2231	190	119	11	178	1	0	0	0	90.76	0.84	0	Y
SE2473.semibin_refined.158	p__Proteobacteria (UID3214)	2231	190	119	11	178	1	0	0	0	90.76	0.84	0	N
SE2460.maxbin.035	p__Proteobacteria (UID3214)	2231	190	119	11	177	2	0	0	0	90.76	0.89	0	N
SE6811.concoct.182_sub	c__Gammaproteobacteria (UID4267)	119	544	284	49	485	8	1	1	0	90.75	2.93	47.06	N
SE6816.rosella_refined.022	k__Bacteria (UID1452)	924	161	108	12	143	4	2	0	0	90.74	5.4	0	Y
SE2454.semibin_refined.132	o__Sphingomonadales (UID3310)	26	569	293	57	466	3	41	2	0	90.73	14.94	42.03	N
SE2540.rosella_refined.145	o__Sphingomonadales (UID3310)	26	569	293	53	515	1	0	0	0	90.72	0.17	0	N
SE2454.semibin_refined.306	c__Gammaproteobacteria (UID4201)	1164	275	174	22	253	0	0	0	0	90.71	0	0	Y
SE6856.metabat2_refined.015	c__Gammaproteobacteria (UID4267)	119	544	284	40	496	8	0	0	0	90.71	1.55	12.5	N
SE2473.metabat_sspec.015	c__Gammaproteobacteria (UID4444)	263	506	232	50	446	10	0	0	0	90.7	1.79	80	N
SE6792.semibin_refined.082	c__Alphaproteobacteria (UID3305)	564	349	230	25	322	2	0	0	0	90.66	0.47	0	Y
SE2522.metabat_sspec.006	c__Gammaproteobacteria (UID4267)	119	544	284	46	492	6	0	0	0	90.62	0.86	50	N
SE6844.metabat_sens.003	c__Alphaproteobacteria (UID3422)	26	529	308	49	462	18	0	0	0	90.62	3.7	11.11	N
SE2540.concoct.145_sub	f__Rhodobacteraceae (UID3360)	56	582	313	78	496	8	0	0	0	90.6	1.4	87.5	Y
SE2506.rosella_refined.049	k__Bacteria (UID3187)	2258	188	117	12	172	4	0	0	0	90.6	1.76	0	Y
SE6798.metabat_spec.051_sub	f__Rhodobacteraceae (UID3375)	32	625	283	56	546	23	0	0	0	90.57	4.21	26.09	N
SE2498.metabat_sspec.003	o__Rhizobiales (UID3447)	356	416	249	26	389	1	0	0	0	90.56	0.2	0	N
SE6863.semibin_refined.004	o__Rhodospirillales (UID3754)	63	336	201	22	313	1	0	0	0	90.55	0.25	0	Y
SE6810.semibin_refined.029	c__Gammaproteobacteria (UID4267)	119	544	284	34	493	16	1	0	0	90.55	4.72	5.26	Y
SE2540.metabat_sens.010_sub	f__Rhodobacteraceae (UID3356)	67	617	330	45	553	18	1	0	0	90.54	2.95	57.14	N
SE6829.metabat_spec.012	o__Rhizobiales (UID3447)	356	416	249	40	356	20	0	0	0	90.54	5.52	25	N
SE2553.metabat2_refined.068_sub	o__Sphingomonadales (UID3310)	26	569	293	86	477	6	0	0	0	90.52	0.76	33.33	Y
SE6783.maxbin.014_sub	f__Rhodobacteraceae (UID3375)	32	625	283	65	551	9	0	0	0	90.52	1.43	11.11	N
SE6842.rosella_refined.062	o__Rhizobiales (UID3449)	345	431	258	49	381	1	0	0	0	90.51	0.13	100	N
SE2537.metabat2_refined.030	k__Bacteria (UID3187)	2258	188	117	14	168	6	0	0	0	90.5	3.47	0	Y
SE2540.metabat_sens.031_sub	o__Sphingomonadales (UID3310)	26	569	293	56	501	12	0	0	0	90.44	1.74	8.33	N
SE6798.concoct.015	c__Alphaproteobacteria (UID3422)	26	529	308	71	435	22	1	0	0	90.43	5.14	68	N
SE6844.metabat2_refined.023	p__Bacteroidetes (UID2591)	364	302	202	21	275	6	0	0	0	90.35	2.33	50	Y
SE2473.metabat2_refined.017	s__algicola (UID2846)	47	571	303	54	478	38	1	0	0	90.35	8.05	26.83	N
SE2454.semibin_refined.296_sub	c__Gammaproteobacteria (UID4443)	356	451	270	53	393	5	0	0	0	90.27	1.28	20	Y
SE6842.concoct.043_sub	f__Rhodobacteraceae (UID3356)	67	617	330	60	538	19	0	0	0	90.26	3	84.21	Y
SE6860.metabat_spec.014	f__Rhodobacteraceae (UID3356)	67	617	330	64	538	15	0	0	0	90.25	2.34	46.67	N
SE2498.metabat2_refined.013_sub	f__Rhodobacteraceae (UID3356)	67	617	330	60	542	15	0	0	0	90.24	3.13	60	N
SE2478.metabat2_refined.038_sub	k__Bacteria (UID2565)	2921	140	85	12	122	6	0	0	0	90.2	5.4	0	N
SE2522.metabat2_refined.001	o__Rhizobiales (UID3447)	356	416	249	41	365	10	0	0	0	90.19	2.46	50	Y
SE2507.metabat_sens.004_sub	f__Rhodobacteraceae (UID3356)	67	617	330	68	528	20	1	0	0	90.19	2.87	17.39	N
SE6820.metabat2_refined.001	f__Rhodobacteraceae (UID3340)	84	568	330	45	514	9	0	0	0	90.14	1.83	55.56	N
SE2553.semibin_refined.217_sub	f__Rhodobacteraceae (UID3356)	67	617	330	75	529	13	0	0	0	90.11	2.11	61.54	Y
SE2454.maxbin.142	o__Rhizobiales (UID3449)	345	431	258	42	355	34	0	0	0	90.11	6.55	76.47	Y
SE6842.rosella_refined.014_sub	f__Rhodobacteraceae (UID3360)	56	582	313	68	492	22	0	0	0	90.07	2.32	36.36	N
SE2553.semibin_refined.252	c__Alphaproteobacteria (UID3337)	468	388	250	40	341	7	0	0	0	90.06	2	42.86	Y
SE6805.rosella_refined.060	c__Gammaproteobacteria (UID4444)	263	506	232	57	446	3	0	0	0	90.05	0.75	66.67	Y
SE2464.semibin_refined.072	c__Gammaproteobacteria (UID4443)	356	451	270	32	401	18	0	0	0	90.05	4.87	16.67	N
SE6863.concoct.058	c__Alphaproteobacteria (UID3305)	564	349	230	40	296	13	0	0	0	90.04	4.77	23.08	N
SE6842.concoct.036	o__Sphingomonadales (UID3310)	26	569	293	84	476	9	0	0	0	90.01	1.46	33.33	Y
SE2485.concoct.162	c__Gammaproteobacteria (UID4267)	119	544	284	45	493	6	0	0	0	89.99	1.17	16.67	Y
SE2485.metabat2_refined.131_sub	f__Rhodobacteraceae (UID3360)	56	582	313	74	484	24	0	0	0	89.97	4.21	54.17	N
SE2543.concoct.117	f__Rhodobacteraceae (UID3356)	67	617	330	63	547	7	0	0	0	89.96	1.04	28.57	Y
SE6811.semibin_refined.059	c__Alphaproteobacteria (UID3337)	468	388	250	36	347	5	0	0	0	89.94	1.46	20	Y
SE2460.concoct.126	c__Gammaproteobacteria (UID4274)	112	581	290	42	524	15	0	0	0	89.9	3.34	53.33	Y
SE6836.concoct.086	c__Alphaproteobacteria (UID3305)	564	349	230	38	305	6	0	0	0	89.88	1.67	33.33	N
SE6829.concoct.019_sub	f__Rhodobacteraceae (UID3340)	84	568	330	60	492	16	0	0	0	89.86	3.44	62.5	N
SE6858.metabat_sens.029_sub	f__Rhodobacteraceae (UID3340)	84	568	330	63	478	27	0	0	0	89.82	4.53	48.15	N
SE6771.rosella_refined.002	c__Alphaproteobacteria (UID3337)	468	388	250	43	343	2	0	0	0	89.79	0.6	0	N
SE2454.rosella_refined.124_sub	o__Cytophagales (UID2936)	47	454	336	56	390	7	1	0	0	89.78	2.13	0	Y
SE6856.semibin_refined.055_sub	c__Alphaproteobacteria (UID3305)	564	349	230	29	311	9	0	0	0	89.78	2.75	88.89	N
SE2473.semibin_refined.128	k__Bacteria (UID2565)	2921	143	88	20	119	4	0	0	0	89.78	4.55	0	Y
SE2454.semibin_refined.002	o__Rhizobiales (UID3447)	356	416	249	41	367	8	0	0	0	89.76	2.44	87.5	N
SE2550.concoct.207	o__Sphingomonadales (UID3310)	26	569	293	67	479	23	0	0	0	89.75	4.65	78.26	N
SE6850.metabat_sspec.023	p__Proteobacteria (UID3880)	1495	261	164	21	238	2	0	0	0	89.74	1.22	100	N
SE2540.vamb.004	f__Rhodobacteraceae (UID3360)	56	582	313	68	508	6	0	0	0	89.69	1.03	66.67	Y
SE2537.metabat_spec.006_sub	k__Bacteria (UID2982)	88	230	148	26	198	5	1	0	0	89.69	2.92	12.5	N
SE6801.metabat_spec.051	f__Rhodobacteraceae (UID3375)	32	625	283	64	544	17	0	0	0	89.66	2.7	58.82	N
SE6816.maxbin.027_sub	k__Bacteria (UID203)	5449	104	58	6	76	19	3	0	0	89.66	6.9	57.14	Y
SE6803.metabat_sens.047	o__Rhizobiales (UID3447)	356	416	249	37	373	6	0	0	0	89.57	1.74	0	N
SE6808.metabat2_refined.046	f__Rhodobacteraceae (UID3356)	67	617	330	80	528	9	0	0	0	89.55	1.16	0	Y
SE6858.concoct.091_sub	f__Rhodobacteraceae (UID3356)	67	617	330	89	518	10	0	0	0	89.52	1.7	20	Y
SE2550.concoct.163	f__Rhodobacteraceae (UID3360)	56	582	313	75	499	8	0	0	0	89.51	1.68	75	N
SE2553.concoct.048_sub	f__Rhodobacteraceae (UID3356)	67	617	330	74	534	9	0	0	0	89.48	1.68	100	Y
SE6783.metabat_sens.019	f__Rhodobacteraceae (UID3356)	67	617	330	68	530	18	1	0	0	89.48	2.89	28.57	N
SE2498.metabat_spec.025_sub	c__Alphaproteobacteria (UID3422)	26	529	308	91	420	17	1	0	0	89.46	4.85	40	N
SE6863.metabat_spec.011	c__Deltaproteobacteria (UID3216)	83	247	155	26	213	8	0	0	0	89.45	3.98	12.5	N
SE2485.semibin_refined.078	c__Alphaproteobacteria (UID3305)	564	349	230	37	305	7	0	0	0	89.44	2.75	14.29	Y
SE2510.semibin_refined.004	k__Bacteria (UID3187)	2258	188	117	15	169	4	0	0	0	89.4	2.17	0	N
SE2485.semibin_refined.103	c__Gammaproteobacteria (UID4267)	119	544	284	46	483	14	1	0	0	89.4	2.54	35.29	N
SE2543.semibin_refined.297	c__Gammaproteobacteria (UID4444)	263	507	232	46	451	9	1	0	0	89.37	1.72	25	N
SE6833.metabat2_refined.060	o__Rhizobiales (UID3447)	356	416	249	29	386	1	0	0	0	89.36	0.2	0	N
SE6808.vamb.016	k__Bacteria (UID1452)	924	161	108	15	139	7	0	0	0	89.25	5.66	14.29	Y
SE2454.rosella_refined.054	c__Gammaproteobacteria (UID4267)	119	544	284	48	491	5	0	0	0	89.18	1.14	0	Y
SE2454.semibin_refined.260	k__Bacteria (UID2565)	2921	143	88	11	127	5	0	0	0	89.14	4.08	40	Y
SE6816.metabat2_refined.139_sub	k__Bacteria (UID2495)	2993	147	91	12	135	0	0	0	0	89.13	0	0	Y
SE6801.metabat_sspec.004	o__Rhizobiales (UID3447)	356	416	249	38	368	8	2	0	0	89.13	2.98	50	N
SE2550.vamb.037_sub	c__Alphaproteobacteria (UID3422)	26	529	308	96	422	11	0	0	0	89.09	1.59	18.18	N
SE2458.vamb.006	p__Proteobacteria (UID3214)	2231	190	119	13	176	1	0	0	0	89.08	0.84	0	N
SE2451.semibin_refined.036	c__Gammaproteobacteria (UID4443)	356	451	270	38	397	16	0	0	0	89.07	3.53	12.5	N
SE2498.metabat2_refined.032	f__Rhodobacteraceae (UID3356)	67	617	330	64	533	20	0	0	0	89.04	2.62	40	Y
SE6825.metabat_spec.008	f__Rhodobacteraceae (UID3356)	67	617	330	70	520	27	0	0	0	89.04	4.7	18.52	N
SE6864.concoct.221_sub	o__Rhizobiales (UID3447)	356	416	249	72	331	12	1	0	0	89	3.55	33.33	Y
SE6833.metabat2_refined.003_sub	f__Rhodobacteraceae (UID3356)	67	617	330	82	515	18	2	0	0	89	4.42	20.83	Y
SE6803.metabat_spec.004_sub	o__Rhizobiales (UID3447)	356	416	249	42	360	14	0	0	0	88.99	3.74	42.86	N
SE6811.semibin_refined.069	f__Rhodobacteraceae (UID3356)	67	617	330	61	550	6	0	0	0	88.98	1.17	66.67	N
SE2553.semibin_refined.274_sub	p__Cyanobacteria (UID2192)	79	584	458	58	517	9	0	0	0	88.97	1.61	22.22	Y
SE6813.concoct.116	k__Bacteria (UID3187)	2258	188	117	16	167	5	0	0	0	88.93	3.42	20	N
SE6836.metabat_sens.004	c__Alphaproteobacteria (UID3422)	26	529	308	68	457	4	0	0	0	88.92	0.84	50	N
SE2460.concoct.134	k__Bacteria (UID2565)	2921	140	85	14	123	3	0	0	0	88.91	2.46	0	N
SE2510.metabat_spec.002_sub	k__Bacteria (UID2982)	88	229	147	24	198	7	0	0	0	88.91	3.78	14.29	N
SE6792.metabat2_refined.008_sub	f__Rhodobacteraceae (UID3361)	46	654	332	84	515	51	4	0	0	88.83	6.76	11.11	Y
SE2553.maxbin.076_sub	f__Rhodobacteraceae (UID3360)	56	582	313	76	491	15	0	0	0	88.8	2.01	20	Y
SE2543.concoct.029_sub	k__Bacteria (UID2565)	2921	143	88	21	119	3	0	0	0	88.8	2.84	33.33	Y
SE6856.rosella_refined.018	p__Proteobacteria (UID3880)	1495	261	164	33	224	4	0	0	0	88.75	0.5	25	N
SE2550.vamb.009	p__Cyanobacteria (UID2192)	79	584	458	60	509	15	0	0	0	88.73	2.91	73.33	N
SE2454.semibin_refined.022	c__Alphaproteobacteria (UID3305)	564	349	230	39	306	4	0	0	0	88.69	0.87	50	Y
SE2507.metabat2_refined.012	c__Alphaproteobacteria (UID3422)	26	529	308	61	461	7	0	0	0	88.68	1.07	14.29	N
SE2553.maxbin.004	c__Alphaproteobacteria (UID3305)	564	349	230	33	308	8	0	0	0	88.68	1.55	25	N
SE2461.metabat_sens.017	f__Rhodobacteraceae (UID3356)	67	617	330	74	513	30	0	0	0	88.63	5.52	33.33	N
SE2543.semibin_refined.033_sub	c__Alphaproteobacteria (UID3422)	26	529	308	60	461	8	0	0	0	88.62	1.68	62.5	N
SE2485.concoct.069_sub	c__Alphaproteobacteria (UID3305)	564	349	230	46	300	3	0	0	0	88.61	0.74	0	N
SE6803.metabat_sspec.011	k__Bacteria (UID3187)	2258	188	117	16	165	7	0	0	0	88.6	2.88	42.86	N
SE2477.metabat_sspec.011	k__Bacteria (UID2565)	2921	142	87	17	123	2	0	0	0	88.59	2.3	0	N
SE2454.semibin_refined.035	k__Bacteria (UID3187)	2258	182	112	17	162	3	0	0	0	88.57	1.84	0	Y
SE6816.concoct.245_sub	c__Alphaproteobacteria (UID3422)	26	529	308	45	471	13	0	0	0	88.57	2.1	53.85	N
SE2544.maxbin.039_sub	c__Gammaproteobacteria (UID4761)	52	693	297	93	553	45	2	0	0	88.57	6.5	25.49	N
SE6816.semibin_refined.128	f__Rhodobacteraceae (UID3360)	56	582	313	102	472	7	1	0	0	88.54	1.27	20	Y
SE6825.metabat2_refined.002	c__Alphaproteobacteria (UID3305)	564	349	230	34	305	10	0	0	0	88.5	2.21	30	N
SE2454.metabat_sens.046_sub	c__Alphaproteobacteria (UID3305)	564	349	230	38	295	15	1	0	0	88.48	4.4	66.67	N
SE2540.semibin_refined.194_sub	c__Alphaproteobacteria (UID3422)	26	529	308	91	435	3	0	0	0	88.43	0.6	66.67	N
SE6816.concoct.094_sub	o__Rhizobiales (UID3447)	356	416	249	54	352	9	1	0	0	88.39	2.98	83.33	N
SE2454.concoct.224_sub	c__Alphaproteobacteria (UID3305)	564	349	230	55	257	37	0	0	0	88.39	12.9	5.41	N
SE2454.maxbin.128_sub	o__Rhizobiales (UID3447)	356	416	249	44	362	10	0	0	0	88.37	2.51	50	N
SE6776.metabat_spec.022	c__Gammaproteobacteria (UID4444)	263	504	231	51	448	5	0	0	0	88.36	1.59	20	N
SE6851.metabat_spec.007	c__Gammaproteobacteria (UID4267)	119	544	284	59	480	5	0	0	0	88.25	1.12	40	Y
SE2451.metabat2_refined.008	o__Rhizobiales (UID3449)	345	431	258	63	358	10	0	0	0	88.25	3.29	40	N
SE6864.semibin_refined.013	c__Alphaproteobacteria (UID3422)	26	529	308	60	462	7	0	0	0	88.24	1.23	14.29	Y
SE2485.metabat2_refined.011_sub	f__Rhodobacteraceae (UID3360)	56	582	313	81	469	30	2	0	0	88.23	6.1	41.67	Y
SE6773.concoct.087	o__Rhizobiales (UID3447)	356	416	249	45	364	7	0	0	0	88.22	1.49	42.86	N
SE6838.metabat_spec.034	c__Gammaproteobacteria (UID4761)	52	693	297	72	609	12	0	0	0	88.22	2.11	91.67	N
SE2553.maxbin.046_sub	c__Gammaproteobacteria (UID4761)	52	693	297	86	556	51	0	0	0	88.22	6.56	15.69	N
SE2553.concoct.261	k__Bacteria (UID1453)	901	171	117	19	143	9	0	0	0	88.21	3.13	0	Y
SE2473.metabat_sens.039	c__Alphaproteobacteria (UID3305)	564	349	230	38	297	14	0	0	0	88.2	2.86	78.57	N
SE2478.metabat_spec.007	c__Gammaproteobacteria (UID4444)	263	507	232	66	426	15	0	0	0	88.18	3.04	33.33	N
SE2454.metabat2_refined.194	k__Bacteria (UID2982)	88	230	148	25	183	20	2	0	0	88.16	12.19	7.69	N
SE2550.concoct.135_sub	c__Gammaproteobacteria (UID4761)	52	693	297	86	582	23	1	1	0	88.14	3.73	40.62	N
SE2553.semibin_refined.210	f__Rhodobacteraceae (UID3361)	46	654	332	109	531	14	0	0	0	88.11	2.03	50	Y
SE2540.vamb.049_sub	f__Rhodobacteraceae (UID3361)	46	654	332	105	532	17	0	0	0	88.08	3.34	35.29	Y
SE6856.metabat_spec.035	f__Rhodobacteraceae (UID3360)	56	582	313	77	495	10	0	0	0	88	1.9	80	N
SE2540.maxbin.043_sub	c__Alphaproteobacteria (UID3305)	564	349	230	56	275	18	0	0	0	87.96	4.2	38.89	N
SE2454.concoct.042_sub	c__Gammaproteobacteria (UID4444)	263	507	232	76	423	8	0	0	0	87.93	2.26	12.5	N
SE2473.semibin_refined.109_sub	o__Sphingomonadales (UID3310)	26	569	293	68	496	5	0	0	0	87.86	0.91	40	Y
SE2536.concoct.021	k__Bacteria (UID2565)	2921	140	85	18	119	3	0	0	0	87.85	2.46	0	N
SE6840.metabat_spec.014	c__Gammaproteobacteria (UID4761)	52	693	297	94	573	26	0	0	0	87.85	3.95	76.92	N
SE2540.concoct.104_sub	f__Rhodobacteraceae (UID3360)	56	582	313	90	477	15	0	0	0	87.83	3.49	60	N
SE2454.rosella_refined.169_sub	o__Sphingomonadales (UID3310)	26	569	293	66	486	17	0	0	0	87.82	1.9	17.65	N
SE6784.metabat_spec.009_sub	f__Rhodobacteraceae (UID3375)	32	625	283	77	519	26	2	1	0	87.81	5.28	26.32	N
SE2537.metabat_spec.002	o__Rhizobiales (UID3447)	356	416	249	48	361	7	0	0	0	87.8	1.3	28.57	N
SE2485.metabat_sens.001_sub	f__Rhodobacteraceae (UID3361)	46	654	332	79	552	23	0	0	0	87.8	5.06	21.74	N
SE2454.semibin_refined.303	c__Gammaproteobacteria (UID4266)	1097	270	172	22	245	3	0	0	0	87.79	0.78	0	Y
SE2473.rosella_refined.134	c__Alphaproteobacteria (UID3305)	564	349	230	39	305	4	1	0	0	87.79	2.1	14.29	N
SE6803.metabat_sens.023	c__Alphaproteobacteria (UID3305)	564	349	230	41	301	7	0	0	0	87.78	2.01	42.86	N
SE2540.metabat_spec.027	o__Rhizobiales (UID3447)	356	416	249	48	345	22	1	0	0	87.77	6.27	24	N
SE6816.semibin_refined.182_sub	c__Gammaproteobacteria (UID4267)	119	544	284	65	477	2	0	0	0	87.76	0.53	0	N
SE2473.semibin_refined.126	f__Rhodobacteraceae (UID3360)	56	582	313	74	499	9	0	0	0	87.76	1.33	66.67	N
SE6828.metabat_spec.001_sub	o__Rhizobiales (UID3447)	356	416	249	42	369	5	0	0	0	87.73	0.66	80	N
SE6798.metabat_sens.044_sub	c__Gammaproteobacteria (UID4444)	263	506	232	95	403	8	0	0	0	87.72	0.81	62.5	N
SE2454.metabat_spec.056	p__Proteobacteria (UID3214)	2231	190	119	19	165	5	1	0	0	87.71	3.65	0	N
SE6864.concoct.224_sub	o__Rhizobiales (UID3447)	356	416	249	54	352	10	0	0	0	87.7	2.05	70	N
SE6828.concoct.056	k__Bacteria (UID2982)	88	230	148	20	198	10	2	0	0	87.7	5.95	6.25	N
SE6771.metabat_spec.004_sub	o__Rhizobiales (UID3447)	356	416	249	49	360	7	0	0	0	87.69	1.65	0	N
SE6784.metabat_sspec.009	c__Gammaproteobacteria (UID4761)	52	693	297	94	590	9	0	0	0	87.67	1.21	33.33	N
SE6860.metabat_spec.010	c__Gammaproteobacteria (UID4444)	263	506	232	70	424	12	0	0	0	87.67	2.01	16.67	N
SE2544.concoct.023	c__Alphaproteobacteria (UID3422)	26	529	308	65	457	7	0	0	0	87.66	1.7	57.14	Y
SE6803.concoct.073	c__Alphaproteobacteria (UID3337)	468	388	250	52	330	6	0	0	0	87.64	1.61	33.33	N
SE2550.concoct.072	p__Cyanobacteria (UID2143)	129	472	368	60	395	17	0	0	0	87.64	3.65	17.65	Y
SE2544.concoct.052	c__Alphaproteobacteria (UID3337)	468	388	250	49	336	3	0	0	0	87.6	0.93	0	N
SE2460.concoct.201	o__Rhizobiales (UID3447)	356	416	249	51	352	13	0	0	0	87.6	3.18	61.54	N
SE6803.metabat2_refined.022	k__Bacteria (UID3187)	2258	188	117	20	167	0	1	0	0	87.59	1.71	0	Y
SE2540.semibin_refined.144	o__Rhodospirillales (UID3754)	63	336	201	33	299	4	0	0	0	87.56	1.03	50	N
SE2454.concoct.288	o__Rhizobiales (UID3447)	356	416	249	47	364	5	0	0	0	87.55	1.34	60	N
SE2454.metabat2_refined.161_sub	s__algicola (UID2846)	47	571	303	89	472	9	1	0	0	87.53	1.52	8.33	Y
SE2451.semibin_refined.052	c__Alphaproteobacteria (UID3422)	26	529	308	58	466	5	0	0	0	87.49	0.97	40	N
SE6838.metabat_sens.013	o__Rhizobiales (UID3447)	356	416	249	53	353	10	0	0	0	87.49	2.49	50	N
SE6858.concoct.093	f__Rhodobacteraceae (UID3356)	67	616	330	107	497	12	0	0	0	87.48	2.84	66.67	N
SE6792.metabat2_refined.043_sub	c__Alphaproteobacteria (UID3305)	564	349	230	42	303	4	0	0	0	87.47	0.38	25	N
SE6844.metabat_sens.025	o__Rhizobiales (UID3449)	345	431	258	67	349	15	0	0	0	87.37	4.47	40	N
SE2485.concoct.141	o__Rhizobiales (UID3447)	356	416	249	61	351	4	0	0	0	87.36	1.2	50	N
SE6811.concoct.170_sub	f__Rhodobacteraceae (UID3356)	67	617	330	76	527	14	0	0	0	87.31	2.58	92.86	N
SE2517.concoct.121_sub	s__algicola (UID2846)	47	571	303	67	484	20	0	0	0	87.29	3.19	25	N
SE6776.metabat2_refined.003	o__Rhizobiales (UID3447)	356	416	249	55	352	9	0	0	0	87.26	1.92	66.67	N
SE6842.semibin_refined.019	f__Rhodobacteraceae (UID3361)	46	654	332	79	566	9	0	0	0	87.25	1.32	44.44	N
SE6771.metabat_sspec.003_sub	o__Rhizobiales (UID3447)	356	416	249	54	354	8	0	0	0	87.24	1.45	50	N
SE6813.metabat_spec.032_sub	f__Rhodobacteraceae (UID3375)	32	625	283	84	486	51	4	0	0	87.24	11.49	22.22	N
SE6768.concoct.077_sub	c__Gammaproteobacteria (UID4443)	356	451	270	61	378	12	0	0	0	87.21	2.72	16.67	N
SE2498.metabat2_refined.047	p__Proteobacteria (UID3880)	1495	261	164	34	216	11	0	0	0	87.17	2.68	9.09	N
SE2540.metabat_sspec.013_sub	o__Rhizobiales (UID3447)	356	416	249	49	359	8	0	0	0	87.16	2.44	50	Y
SE2485.semibin_refined.140	c__Alphaproteobacteria (UID3337)	468	388	250	50	334	4	0	0	0	87.13	1.6	25	N
SE2543.concoct.240_sub	o__Rhodospirillales (UID3754)	63	336	201	53	278	5	0	0	0	87.13	2.49	60	Y
SE2473.vamb.039_sub	c__Gammaproteobacteria (UID4761)	52	693	297	106	570	16	1	0	0	87.12	2.63	42.11	N
SE2464.vamb.014	o__Rhizobiales (UID3449)	345	431	258	58	355	18	0	0	0	87.06	4.01	50	N
SE6792.concoct.041_sub	f__Rhodobacteraceae (UID3356)	67	617	330	76	525	16	0	0	0	87.02	2.17	75	N
SE6816.concoct.173_sub	o__Rhizobiales (UID3447)	356	416	249	56	351	9	0	0	0	87.02	2.74	22.22	N
SE6842.maxbin.007_sub	c__Alphaproteobacteria (UID3422)	26	529	308	89	417	23	0	0	0	87.02	3.52	21.74	N
SE6805.rosella_refined.058_sub	o__Rhizobiales (UID3447)	356	416	249	53	362	1	0	0	0	87.01	0.03	0	N
SE2550.concoct.191	c__Gammaproteobacteria (UID4444)	263	507	232	57	438	12	0	0	0	87	1.88	41.67	N
SE6828.concoct.015	o__Rhizobiales (UID3447)	356	416	249	54	360	2	0	0	0	86.99	0.8	50	N
SE2478.metabat2_refined.041	c__Gammaproteobacteria (UID4267)	119	544	284	66	463	13	2	0	0	86.98	4.22	5.26	N
SE6867.metabat2_refined.037_sub	o__Rhizobiales (UID3447)	356	416	249	43	360	13	0	0	0	86.97	4.39	38.46	N
SE6833.rosella_refine.4_0	c__Alphaproteobacteria (UID3337)	468	388	250	66	272	50	0	0	0	86.97	14.42	88	N
SE2454.concoct.043_sub	c__Gammaproteobacteria (UID4761)	52	693	297	105	562	26	0	0	0	86.94	2.35	73.08	N
SE6864.semibin_refined.012	c__Alphaproteobacteria (UID3337)	468	388	250	58	325	5	0	0	0	86.88	1.8	40	Y
SE6803.concoct.029	k__Bacteria (UID2565)	2921	142	87	15	126	1	0	0	0	86.84	0.57	0	N
SE2460.rosella_refined.086	c__Alphaproteobacteria (UID3422)	26	529	308	65	456	8	0	0	0	86.82	1.79	62.5	N
SE2473.metabat_sens.005_sub	o__Rhodospirillales (UID3754)	63	336	201	38	288	10	0	0	0	86.8	2.66	40	N
SE2550.metabat2_refined.060	f__Rhodobacteraceae (UID3356)	67	617	330	85	510	21	1	0	0	86.76	3.52	33.33	N
SE2464.concoct.088_sub	f__Rhodobacteraceae (UID3356)	67	617	330	99	507	11	0	0	0	86.75	1.74	36.36	N
SE6828.metabat2_refined.049	o__Rhizobiales (UID3447)	356	416	249	49	359	7	1	0	0	86.75	1.93	20	N
SE6768.vamb.030_sub	o__Rhizobiales (UID3447)	356	416	249	60	347	8	1	0	0	86.75	2.89	54.55	N
SE2553.semibin_refined.229	c__Alphaproteobacteria (UID3305)	564	349	230	52	295	2	0	0	0	86.72	0.23	50	Y
SE2543.vamb.059_sub	o__Rhizobiales (UID3449)	345	431	258	66	356	9	0	0	0	86.68	2.51	44.44	Y
SE6803.concoct.019	o__Rhizobiales (UID3449)	345	431	258	55	369	7	0	0	0	86.66	2.11	14.29	N
SE6792.metabat2_refined.011_sub	f__Rhodobacteraceae (UID3361)	46	654	332	92	550	11	1	0	0	86.64	2.6	14.29	N
SE6773.metabat_sens.008	f__Rhodobacteraceae (UID3340)	84	568	330	67	491	8	2	0	0	86.61	1.68	71.43	N
SE2544.vamb.020	c__Alphaproteobacteria (UID3305)	564	349	230	44	299	6	0	0	0	86.59	1.88	33.33	N
SE6816.maxbin.019_sub	f__Rhodobacteraceae (UID3356)	67	617	330	92	510	15	0	0	0	86.58	2.47	20	N
SE2485.rosella_refined.106	c__Alphaproteobacteria (UID3337)	468	388	250	50	334	4	0	0	0	86.57	1.13	25	N
SE2544.concoct.173	k__Bacteria (UID2982)	88	230	148	29	197	4	0	0	0	86.51	1.38	0	N
SE2485.concoct.173_sub	f__Rhodobacteraceae (UID3356)	67	616	330	97	501	17	1	0	0	86.48	2.93	30	Y
SE2454.vamb.104_sub	k__Bacteria (UID2982)	88	229	147	24	195	9	1	0	0	86.39	5.96	58.33	Y
SE6801.metabat_spec.053_sub	f__Rhodobacteraceae (UID3360)	56	582	313	87	470	22	3	0	0	86.38	4.24	16.13	N
SE2540.metabat2_refined.070_sub	s__algicola (UID2846)	47	571	303	112	425	30	3	1	0	86.38	7.16	8.89	N
SE2543.metabat_sens.011_sub	f__Rhodobacteraceae (UID3356)	67	617	330	83	442	87	5	0	0	86.31	13.99	21.57	N
SE6860.semibin_refined.020	p__Proteobacteria (UID3880)	1495	261	164	27	233	1	0	0	0	86.28	0.61	0	N
SE2500.semibin_refined.005	c__Alphaproteobacteria (UID3305)	564	349	230	45	302	2	0	0	0	86.23	0.45	100	N
SE2457.metabat_sens.001_sub	c__Alphaproteobacteria (UID3422)	26	529	308	88	383	56	2	0	0	86.23	11.99	29.03	N
SE2464.concoct.019	c__Gammaproteobacteria (UID4444)	263	506	232	103	382	21	0	0	0	86.22	3.19	61.9	N
SE6853.maxbin.019	k__Bacteria (UID2565)	2921	140	85	16	119	5	0	0	0	86.22	4.81	20	Y
SE2543.maxbin.032_sub	f__Rhodobacteraceae (UID3356)	67	617	330	90	469	55	3	0	0	86.22	10.05	14.06	N
SE6864.maxbin.066	c__Gammaproteobacteria (UID4267)	119	544	284	71	436	37	0	0	0	86.19	8.91	10.81	N
SE2454.semibin_refined.018_sub	o__Sphingomonadales (UID3310)	26	569	293	124	438	7	0	0	0	86.17	1.43	14.29	Y
SE6842.concoct.020_sub	f__Rhodobacteraceae (UID3356)	67	617	330	82	516	19	0	0	0	86.16	2.94	68.42	N
SE6805.concoct.116	f__Rhodobacteraceae (UID3356)	67	615	329	71	539	5	0	0	0	86.15	1.06	0	N
SE6844.metabat2_refined.059	o__Rhizobiales (UID3447)	356	416	249	63	340	13	0	0	0	86.06	3.78	53.85	N
SE6856.concoct.121	o__Rhizobiales (UID3447)	356	416	249	62	346	8	0	0	0	86.04	1.04	87.5	N
SE6816.metabat2_refined.008_sub	f__Rhodobacteraceae (UID3360)	56	582	313	87	470	24	1	0	0	86.02	4.74	33.33	Y
SE2485.concoct.116	o__Rhizobiales (UID3449)	345	431	258	53	371	7	0	0	0	86.01	2.02	42.86	Y
SE2553.metabat2_refined.014_sub	f__Rhodobacteraceae (UID3360)	56	582	313	114	455	12	1	0	0	85.99	2.52	40	N
SE2485.semibin_refined.113	k__Bacteria (UID2565)	2921	142	87	26	115	1	0	0	0	85.95	1.15	100	N
SE2550.semibin_refined.082	k__Bacteria (UID2565)	2921	142	87	15	123	4	0	0	0	85.94	4.02	75	N
SE6844.concoct.040	k__Bacteria (UID2565)	2921	143	88	21	119	3	0	0	0	85.93	3.41	33.33	N
SE6811.rosella_refined.097	o__Rhizobiales (UID3449)	345	431	258	54	373	4	0	0	0	85.92	0.65	100	N
SE6864.vamb.047	c__Gammaproteobacteria (UID4267)	119	544	284	69	453	21	1	0	0	85.9	3.22	66.67	Y
SE6771.metabat_sens.011_sub	c__Alphaproteobacteria (UID3422)	26	529	308	93	398	37	1	0	0	85.9	8.56	17.5	N
SE6864.concoct.209	f__Rhodobacteraceae (UID3356)	67	616	330	95	511	10	0	0	0	85.87	1.75	70	N
SE2550.metabat2_refined.046	c__Gammaproteobacteria (UID4266)	1097	270	172	29	233	8	0	0	0	85.87	4.1	50	Y
SE6834.metabat_spec.027_sub	f__Rhodobacteraceae (UID3356)	67	616	330	97	498	20	1	0	0	85.85	4.27	26.09	N
SE2490.metabat_sens.029_sub	k__Bacteria (UID2565)	2921	142	87	17	122	3	0	0	0	85.81	2.37	0	N
SE6771.maxbin.012_sub	o__Oceanospirillales (UID4446)	43	529	233	94	405	28	2	0	0	85.81	8.14	35.29	N
SE2460.metabat2_refined.027_sub	f__Rhodobacteraceae (UID3356)	67	617	330	101	476	39	1	0	0	85.78	6.96	42.86	Y
SE6836.maxbin.009	o__Rhizobiales (UID3447)	356	416	249	56	352	8	0	0	0	85.75	2.54	37.5	N
SE6811.concoct.151	f__Rhodobacteraceae (UID3356)	67	617	330	98	508	11	0	0	0	85.62	2.01	36.36	N
SE2460.metabat_sens.006	f__Rhodobacteraceae (UID3360)	56	582	313	106	474	2	0	0	0	85.58	0.34	50	N
SE2553.concoct.133	k__Bacteria (UID1453)	901	168	114	21	146	1	0	0	0	85.57	0.88	0	Y
SE6833.semibin_refined.050	o__Rhizobiales (UID3447)	356	416	249	70	342	4	0	0	0	85.55	1.41	50	N
SE6805.metabat_sens.006	f__Rhodobacteraceae (UID3360)	56	582	313	87	476	19	0	0	0	85.5	2.05	73.68	N
SE2473.metabat2_refined.063	o__Rhizobiales (UID3449)	345	431	258	82	344	5	0	0	0	85.49	1.18	40	Y
SE2503.metabat_sens.003	f__Rhodobacteraceae (UID3356)	67	617	330	81	507	28	1	0	0	85.47	4.69	48.39	N
SE2454.metabat2_refined.018_sub	c__Alphaproteobacteria (UID3305)	564	349	230	72	270	7	0	0	0	85.46	1.83	28.57	N
SE6773.metabat_sens.045_sub	c__Gammaproteobacteria (UID4761)	52	693	297	121	534	37	1	0	0	85.44	5.31	27.5	N
SE2543.concoct.080_sub	k__Bacteria (UID2565)	2921	140	85	17	121	2	0	0	0	85.42	1.76	50	Y
SE2464.concoct.030	f__Rhodobacteraceae (UID3360)	56	582	313	99	465	16	2	0	0	85.39	3.54	31.82	N
SE6816.maxbin.098	c__Alphaproteobacteria (UID3305)	564	349	230	40	306	3	0	0	0	85.37	1.09	0	Y
SE6816.concoct.167	c__Alphaproteobacteria (UID3305)	564	349	230	39	307	3	0	0	0	85.37	1.3	0	Y
SE2473.concoct.045	o__Rhizobiales (UID3447)	356	416	249	64	346	6	0	0	0	85.35	1.64	16.67	N
SE2464.concoct.146	p__Cyanobacteria (UID2192)	79	584	458	83	489	12	0	0	0	85.33	2.4	8.33	Y
SE2510.concoct.075	c__Alphaproteobacteria (UID3422)	26	529	308	73	440	15	1	0	0	85.3	3.63	22.22	N
SE6808.metabat_sens.021	c__Alphaproteobacteria (UID3422)	26	529	308	78	443	8	0	0	0	85.29	2.22	37.5	N
SE6856.metabat_spec.003	f__Rhodobacteraceae (UID3356)	67	617	330	95	503	19	0	0	0	85.29	4.15	63.16	Y
SE6811.concoct.062	c__Gammaproteobacteria (UID4444)	263	505	231	62	432	11	0	0	0	85.26	2.33	27.27	Y
SE2484.concoct.022	f__Rhodobacteraceae (UID3360)	56	582	313	107	456	19	0	0	0	85.23	3.76	15.79	N
SE6825.metabat_spec.011	c__Alphaproteobacteria (UID3422)	26	529	308	77	427	24	1	0	0	85.23	5.28	33.33	N
SE6851.metabat2_refined.011	o__Rhizobiales (UID3449)	345	431	258	70	346	15	0	0	0	85.21	3.03	73.33	N
SE6828.vamb.023	c__Gammaproteobacteria (UID4267)	119	544	284	69	460	13	1	1	0	85.21	4.52	0	N
SE2464.maxbin.006_sub	k__Bacteria (UID2565)	2921	142	87	17	118	7	0	0	0	85.21	4.87	57.14	N
SE2510.metabat_sens.003	f__Rhodobacteraceae (UID3356)	67	617	330	91	511	15	0	0	0	85.2	2.56	33.33	N
SE6811.semibin_refined.051	c__Alphaproteobacteria (UID3305)	564	349	230	41	305	3	0	0	0	85.16	1.09	0	N
SE2454.semibin_refined.011_sub	s__algicola (UID2846)	47	571	303	90	472	9	0	0	0	85.15	1.26	44.44	Y
SE6850.metabat_spec.013	c__Gammaproteobacteria (UID4267)	119	544	284	74	461	9	0	0	0	85.15	2.16	11.11	N
SE2540.semibin_refined.182	c__Gammaproteobacteria (UID4274)	112	581	290	74	497	10	0	0	0	85.13	0.94	20	N
SE2543.maxbin.060_sub	f__Rhodobacteraceae (UID3361)	46	654	332	110	521	23	0	0	0	85.12	4.31	69.57	N
SE6858.metabat_sens.002_sub	f__Rhodobacteraceae (UID3360)	56	582	313	99	456	26	0	1	0	85.11	5.36	40.62	N
SE6858.metabat_spec.008	c__Gammaproteobacteria (UID4267)	119	544	284	82	444	18	0	0	0	85.05	3.03	16.67	N
SE2506.maxbin.040	k__Bacteria (UID3187)	2258	188	117	21	161	6	0	0	0	85.04	3.47	0	Y
SE2454.concoct.169	k__Bacteria (UID2565)	2921	152	93	19	131	2	0	0	0	85.03	1.14	50	Y
SE2540.metabat2_refined.079_sub	c__Gammaproteobacteria (UID4444)	263	507	232	95	400	12	0	0	0	84.98	2.77	33.33	N
SE2543.concoct.149_sub	f__Rhodobacteraceae (UID3361)	46	654	332	126	512	15	1	0	0	84.95	2.71	22.22	Y
SE6864.maxbin.032	c__Gammaproteobacteria (UID4761)	52	693	297	101	486	98	8	0	0	84.93	14.17	13.11	N
SE2543.metabat2_refined.166	o__Rhizobiales (UID3447)	356	416	249	54	348	14	0	0	0	84.91	2.78	78.57	N
SE2473.semibin_refined.113	k__Bacteria (UID2565)	2921	142	87	17	121	4	0	0	0	84.89	0.42	0	N
SE2498.vamb.013_sub	f__Rhodobacteraceae (UID3375)	32	625	283	97	517	11	0	0	0	84.89	2.22	45.45	N
SE2553.semibin_refined.270	o__Rhizobiales (UID3447)	356	416	249	53	356	7	0	0	0	84.85	2.04	42.86	N
SE6856.concoct.077_sub	o__Rhizobiales (UID3449)	345	431	258	80	338	13	0	0	0	84.79	2.66	53.85	N
SE6783.semibin_refined.014	f__Rhodobacteraceae (UID3356)	67	617	330	90	514	13	0	0	0	84.78	1.7	30.77	N
SE6803.rosella_refine.7_0	c__Gammaproteobacteria (UID4444)	263	506	232	83	404	19	0	0	0	84.73	4.11	52.63	N
SE2457.metabat_spec.046_sub	c__Alphaproteobacteria (UID3305)	564	349	230	60	280	9	0	0	0	84.67	2.66	100	N
SE6864.concoct.063	k__Bacteria (UID3187)	2258	188	117	33	152	3	0	0	0	84.57	1.71	0	Y
SE2544.metabat2_refined.040_sub	f__Rhodobacteraceae (UID3356)	67	617	330	83	510	24	0	0	0	84.57	3.49	29.17	Y
SE2464.metabat_spec.036_sub	f__Rhodobacteraceae (UID3360)	56	582	313	105	442	33	2	0	0	84.57	6.8	17.95	N
SE6842.concoct.112	k__Bacteria (UID2565)	2921	143	88	15	123	5	0	0	0	84.56	3.51	0	Y
SE2544.rosella_refine.111_0	f__Rhodobacteraceae (UID3356)	67	617	330	113	457	46	1	0	0	84.56	8.86	36.73	N
SE6816.semibin_refined.150	c__Alphaproteobacteria (UID3305)	564	349	230	47	300	1	1	0	0	84.48	1.01	25	Y
SE6838.concoct.115_sub	o__Oceanospirillales (UID4446)	43	529	233	104	412	13	0	0	0	84.46	2.43	61.54	N
SE6816.metabat_sens.007	o__Rhizobiales (UID3447)	356	416	249	70	326	17	1	2	0	84.45	5.46	81.25	N
SE6836.metabat2_refined.044_sub	o__Rhizobiales (UID3447)	356	416	249	72	314	29	1	0	0	84.45	9.57	3.12	Y
SE2484.metabat_sens.016_sub	o__Rhizobiales (UID3447)	356	416	249	57	344	14	1	0	0	84.44	3.57	41.18	N
SE2473.metabat2_refined.001	s__algicola (UID2846)	47	571	303	75	466	30	0	0	0	84.44	4.85	26.67	N
SE2454.semibin_refined.036	k__Bacteria (UID2565)	2921	140	85	19	121	0	0	0	0	84.41	0	0	N
SE2454.concoct.165	o__Rhizobiales (UID3447)	356	416	249	64	336	16	0	0	0	84.4	4.03	43.75	N
SE2543.semibin_refined.016_sub	c__Gammaproteobacteria (UID4267)	119	544	284	85	450	8	1	0	0	84.34	2.05	36.36	N
SE6864.metabat2_refined.063	c__Deltaproteobacteria (UID3216)	83	247	155	34	204	9	0	0	0	84.34	3.64	11.11	Y
SE6864.concoct.013_sub	f__Rhodobacteraceae (UID3356)	67	617	330	99	497	21	0	0	0	84.3	3.4	52.38	N
SE6808.semibin_refined.047_sub	c__Gammaproteobacteria (UID4761)	52	693	297	112	571	10	0	0	0	84.26	2.1	80	N
SE6847.concoct.045	f__Rhodobacteraceae (UID3360)	56	582	313	89	486	7	0	0	0	84.25	1.58	28.57	N
SE2517.metabat2_refined.049	o__Rhizobiales (UID3447)	356	416	249	65	344	6	1	0	0	84.25	2.15	55.56	N
SE2507.concoct.019	f__Rhodobacteraceae (UID3356)	67	617	330	90	516	11	0	0	0	84.24	2.18	54.55	Y
SE2454.rosella_refined.017_sub	o__Rhizobiales (UID3447)	356	416	249	80	285	50	1	0	0	84.22	13.92	62.26	N
SE2517.concoct.002	k__Bacteria (UID2982)	88	230	148	32	194	4	0	0	0	84.21	1.41	25	N
SE2513.metabat_spec.003	f__Rhodobacteraceae (UID3356)	67	617	330	87	502	28	0	0	0	84.18	4.36	82.14	N
SE2537.maxbin.001	c__Alphaproteobacteria (UID3305)	564	349	230	42	306	1	0	0	0	84.13	0.22	0	N
SE2543.maxbin.001	c__Alphaproteobacteria (UID3305)	564	349	230	42	306	1	0	0	0	84.13	0.22	0	N
SE2540.semibin_refined.085_sub	f__Rhodobacteraceae (UID3360)	56	582	313	110	462	10	0	0	0	84.12	1.75	60	N
SE2473.semibin_refined.141_sub	k__Bacteria (UID1453)	901	171	117	26	134	11	0	0	0	84.11	4.42	9.09	N
SE2454.semibin_refined.280	c__Gammaproteobacteria (UID4443)	356	451	270	57	379	15	0	0	0	84.09	3.56	0	Y
SE6808.metabat2_refined.023	o__Rhizobiales (UID3449)	345	431	258	76	347	8	0	0	0	84	2.11	62.5	N
SE2451.semibin_refined.033	c__Alphaproteobacteria (UID3305)	564	349	230	49	291	9	0	0	0	84	2.68	55.56	N
SE2458.concoct.058	c__Alphaproteobacteria (UID3422)	26	529	308	95	420	13	1	0	0	83.97	2.95	81.25	N
SE6783.concoct.015	c__Alphaproteobacteria (UID3422)	26	529	308	80	443	6	0	0	0	83.96	1.44	33.33	N
SE6864.metabat2_refined.112	f__Rhodobacteraceae (UID3361)	46	654	332	135	493	26	0	0	0	83.95	3.89	42.31	Y
SE6842.metabat_spec.004	o__Rhizobiales (UID3447)	356	416	249	79	328	9	0	0	0	83.94	2.48	77.78	N
SE2540.metabat2_refined.007_sub	o__Rhizobiales (UID3447)	356	416	249	68	335	13	0	0	0	83.93	4.42	38.46	N
SE6816.concoct.186	f__Rhodobacteraceae (UID3375)	32	625	283	106	510	9	0	0	0	83.88	1.4	33.33	Y
SE2454.maxbin.115	o__Rhizobiales (UID3642)	107	485	316	92	366	26	1	0	0	83.88	5.78	17.24	Y
SE6783.metabat2_refined.048_sub	o__Rhizobiales (UID3447)	356	416	249	65	339	12	0	0	0	83.86	3.58	58.33	N
SE2506.concoct.019	o__Rhizobiales (UID3447)	356	416	249	68	338	10	0	0	0	83.83	1.94	60	N
SE6813.semibin_refined.006	c__Alphaproteobacteria (UID3305)	564	349	230	48	297	4	0	0	0	83.81	1.74	0	N
SE2490.concoct.041_sub	c__Gammaproteobacteria (UID4444)	263	507	232	69	428	10	0	0	0	83.81	2.06	20	N
SE6768.metabat_sens.044_sub	f__Rhodobacteraceae (UID3360)	56	582	313	98	458	26	0	0	0	83.8	5.16	65.38	N
SE6803.metabat_sspec.017	c__Alphaproteobacteria (UID3305)	564	349	230	64	283	2	0	0	0	83.78	0.87	0	N
SE2451.semibin_refined.062	o__Sphingomonadales (UID3310)	26	569	293	97	467	5	0	0	0	83.76	1	40	N
SE6834.rosella_refine.5_0	c__Alphaproteobacteria (UID3422)	26	529	308	88	421	20	0	0	0	83.73	4.42	50	N
SE2477.metabat_spec.004	f__Rhodobacteraceae (UID3356)	67	617	330	101	496	20	0	0	0	83.69	2.93	70	N
SE2550.metabat2_refined.037	k__Bacteria (UID2982)	88	230	148	39	178	13	0	0	0	83.68	6.25	15.38	N
SE2543.concoct.219_sub	k__Bacteria (UID2565)	2921	143	88	25	112	6	0	0	0	83.63	2.65	33.33	N
SE2506.metabat2_refined.042_sub	f__Rhodobacteraceae (UID3361)	46	654	332	109	511	34	0	0	0	83.62	4.84	23.53	N
SE2451.concoct.032	c__Gammaproteobacteria (UID4444)	263	506	232	81	410	14	1	0	0	83.59	2.21	35.29	N
SE2517.concoct.128	s__algicola (UID2846)	47	571	303	90	464	17	0	0	0	83.57	2.72	23.53	N
SE6851.metabat_spec.024	o__Rhizobiales (UID3447)	356	416	249	65	333	17	1	0	0	83.56	4.17	45	N
SE6811.concoct.112	c__Alphaproteobacteria (UID3422)	26	529	308	85	429	15	0	0	0	83.53	3.2	93.33	N
SE2464.metabat2_refined.018_sub	k__Bacteria (UID2565)	2921	140	85	29	110	1	0	0	0	83.52	0.59	0	N
SE6829.metabat_sspec.010_sub	c__Alphaproteobacteria (UID3422)	26	529	308	85	438	6	0	0	0	83.49	1.3	0	N
SE2503.rosella_refined.011_sub	c__Gammaproteobacteria (UID4443)	356	451	270	79	365	7	0	0	0	83.47	1.72	14.29	N
SE6803.concoct.010_sub	f__Rhodobacteraceae (UID3356)	67	617	330	105	489	23	0	0	0	83.39	2.13	60.87	N
SE6808.rosella_refined.021	k__Bacteria (UID2982)	88	230	148	35	194	1	0	0	0	83.36	0.68	0	Y
SE6813.metabat_sspec.017	c__Gammaproteobacteria (UID4266)	1097	270	172	38	228	4	0	0	0	83.33	1.65	25	N
SE6816.semibin_refined.134	k__Bacteria (UID3187)	2258	190	119	28	157	5	0	0	0	83.31	3.78	0	Y
SE2543.rosella_refine.26_0	o__Rhizobiales (UID3447)	356	416	249	88	319	8	1	0	0	83.29	3.61	63.64	N
SE6813.maxbin.003_sub	o__Rhizobiales (UID3447)	356	416	249	68	342	6	0	0	0	83.25	1.62	50	N
SE2553.metabat2_refined.159_sub	o__Rhizobiales (UID3449)	345	431	258	66	352	11	2	0	0	83.25	4.53	70.59	N
SE2553.semibin_refined.280	c__Gammaproteobacteria (UID4266)	1097	270	172	36	231	2	0	0	1	83.24	1.94	0	Y
SE2537.concoct.025	k__Bacteria (UID2565)	2921	140	85	20	117	3	0	0	0	83.24	2.46	33.33	N
SE6834.metabat_sens.010_sub	c__Alphaproteobacteria (UID3305)	564	349	230	62	282	5	0	0	0	83.23	1.36	0	N
SE2464.maxbin.024_sub	c__Alphaproteobacteria (UID3422)	26	529	308	117	354	50	8	0	0	83.22	14.37	14.86	N
SE2458.metabat_sens.026	o__Rhizobiales (UID3447)	356	416	249	73	334	9	0	0	0	83.21	2.11	22.22	N
SE2454.concoct.201_sub	k__Bacteria (UID2565)	2921	143	87	27	111	5	0	0	0	83.21	4.7	20	Y
SE2536.metabat_sens.001_sub	f__Rhodobacteraceae (UID3361)	46	654	332	110	519	25	0	0	0	83.2	4.32	20	N
SE6816.maxbin.064_sub	c__Alphaproteobacteria (UID3305)	564	349	230	55	284	10	0	0	0	83.14	3.13	40	N
SE6842.concoct.108_sub	c__Gammaproteobacteria (UID4761)	52	693	297	123	558	12	0	0	0	83.13	2.46	33.33	N
SE6833.metabat_sens.006_sub	c__Gammaproteobacteria (UID4761)	52	693	297	122	533	38	0	0	0	83.04	5.31	10.53	N
SE2454.semibin_refined.031_sub	c__Alphaproteobacteria (UID3305)	564	349	230	51	295	3	0	0	0	82.99	0.58	33.33	Y
SE6834.concoct.078_sub	f__Rhodobacteraceae (UID3356)	67	617	330	105	501	11	0	0	0	82.99	2.06	63.64	N
SE2543.concoct.033_sub	p__Bacteroidetes (UID2591)	364	298	198	61	232	4	1	0	0	82.97	2.12	14.29	Y
SE6805.metabat_spec.011	k__Bacteria (UID3187)	2258	188	117	29	154	5	0	0	0	82.97	2.62	0	N
SE2451.semibin_refined.061	o__Rhizobiales (UID3447)	356	416	249	64	346	6	0	0	0	82.92	0.88	33.33	N
SE2473.rosella_refined.002	c__Alphaproteobacteria (UID3422)	26	529	308	95	430	4	0	0	0	82.91	0.83	25	Y
SE2553.concoct.053_sub	k__Bacteria (UID2565)	2921	140	85	16	121	3	0	0	0	82.87	0.76	100	Y
SE6803.metabat_sens.003_sub	f__Rhodobacteraceae (UID3360)	56	582	313	125	424	33	0	0	0	82.82	6.46	12.12	N
SE6810.metabat_spec.022	f__Rhodobacteraceae (UID3340)	84	568	330	103	428	34	3	0	0	82.82	6.95	83.72	N
SE2550.vamb.011	o__Rhizobiales (UID3447)	356	416	249	74	335	7	0	0	0	82.76	1.39	42.86	N
SE6844.semibin_refined.030	o__Rhizobiales (UID3449)	345	431	258	70	349	12	0	0	0	82.76	3.16	50	N
SE6853.metabat_sens.010_sub	c__Gammaproteobacteria (UID4274)	112	581	290	128	434	19	0	0	0	82.76	3.75	15.79	N
SE6864.concoct.033	c__Alphaproteobacteria (UID3305)	564	349	230	56	289	4	0	0	0	82.75	1.1	75	Y
SE2543.concoct.087_sub	p__Cyanobacteria (UID2189)	82	579	450	90	482	7	0	0	0	82.73	0.79	57.14	Y
SE2544.metabat2_refined.093_sub	f__Rhodobacteraceae (UID3356)	67	617	330	132	465	20	0	0	0	82.73	3.1	45	Y
SE2454.semibin_refined.059	k__Bacteria (UID2565)	2921	142	87	16	124	2	0	0	0	82.69	1.15	0	Y
SE2540.semibin_refined.169	o__Rhizobiales (UID3447)	356	416	249	60	347	8	1	0	0	82.69	2.28	9.09	N
SE6801.rosella_refined.060	c__Gammaproteobacteria (UID4444)	263	506	232	103	399	4	0	0	0	82.6	0.29	100	N
SE2553.concoct.198	f__Rhodobacteraceae (UID3360)	56	582	313	121	454	7	0	0	0	82.56	1.12	57.14	N
SE2543.vamb.064_sub	k__Bacteria (UID2565)	2921	143	87	22	116	5	0	0	0	82.55	4.09	0	N
SE6784.concoct.012_sub	o__Rhizobiales (UID3447)	356	416	249	68	337	11	0	0	0	82.53	2.88	54.55	N
SE2496.concoct.055_sub	o__Rhizobiales (UID3447)	356	416	249	72	337	7	0	0	0	82.5	2.24	71.43	N
SE6792.metabat2_refined.082	k__Bacteria (UID203)	5449	104	58	45	58	1	0	0	0	82.47	1.72	100	N
SE6858.metabat_spec.003	o__Rhizobiales (UID3447)	356	416	249	75	324	16	1	0	0	82.47	4.24	68.42	N
SE6858.vamb.006	k__Bacteria (UID2982)	88	230	148	42	185	3	0	0	0	82.46	1.58	0	Y
SE6863.metabat_sens.007	c__Gammaproteobacteria (UID4444)	263	507	232	93	403	11	0	0	0	82.41	2.67	27.27	N
SE6811.semibin_refined.092	c__Alphaproteobacteria (UID3422)	26	529	308	105	421	3	0	0	0	82.39	0.49	66.67	N
SE2553.metabat2_refined.121_sub	c__Gammaproteobacteria (UID4266)	1097	270	172	39	222	8	1	0	0	82.38	2.45	0	Y
SE2464.concoct.058_sub	f__Rhodobacteraceae (UID3360)	56	582	313	112	462	8	0	0	0	82.35	0.91	25	N
SE6810.concoct.095_sub	c__Gammaproteobacteria (UID4444)	263	507	232	101	401	5	0	0	0	82.34	0.96	0	N
SE6798.metabat_spec.014_sub	c__Alphaproteobacteria (UID3305)	564	349	230	51	289	9	0	0	0	82.34	2.91	0	N
SE2537.metabat_sens.005	o__Sphingomonadales (UID3310)	26	569	293	98	441	28	2	0	0	82.33	6.04	14.71	N
SE2461.metabat_sens.016	f__Rhodobacteraceae (UID3356)	67	617	330	114	488	15	0	0	0	82.32	2.29	60	N
SE2490.concoct.014	c__Gammaproteobacteria (UID4443)	356	451	270	77	367	7	0	0	0	82.29	2.08	14.29	N
SE2537.metabat2_refined.023_sub	c__Alphaproteobacteria (UID3422)	26	529	308	110	386	33	0	0	0	82.28	7.04	57.58	N
SE2460.concoct.044_sub	f__Rhodobacteraceae (UID3356)	67	617	330	116	481	20	0	0	0	82.22	3.95	70	N
SE2553.concoct.006_sub	o__Rhizobiales (UID3447)	356	416	249	74	335	7	0	0	0	82.21	2.14	28.57	N
SE6771.concoct.055_sub	c__Alphaproteobacteria (UID3422)	26	529	308	120	396	11	2	0	0	82.21	3.38	52.94	N
SE6801.metabat2_refined.040	c__Alphaproteobacteria (UID3305)	564	349	230	61	287	1	0	0	0	82.2	0.22	0	N
SE2473.concoct.071	f__Rhodobacteraceae (UID3361)	46	654	332	144	483	27	0	0	0	82.2	4.83	55.56	N
SE2544.concoct.180	o__Rhizobiales (UID3447)	356	416	249	69	326	21	0	0	0	82.17	5.89	42.86	N
SE2553.metabat_spec.003_sub	f__Rhodobacteraceae (UID3356)	67	617	330	123	465	28	1	0	0	82.13	4.49	19.35	N
SE6838.metabat2_refined.028	c__Alphaproteobacteria (UID3305)	564	349	230	61	280	8	0	0	0	82.11	2.25	12.5	N
SE2490.metabat2_refined.007_sub	k__Bacteria (UID2982)	88	230	148	46	178	6	0	0	0	81.9	3.51	0	N
SE6864.metabat2_refined.051_sub	f__Rhodobacteraceae (UID3340)	84	568	330	128	392	44	4	0	0	81.86	9.21	12.5	N
SE2490.concoct.029	f__Rhodobacteraceae (UID3356)	67	617	330	112	488	17	0	0	0	81.84	3.92	47.06	N
SE6834.metabat_sens.024_sub	f__Rhodobacteraceae (UID3360)	56	582	313	115	450	17	0	0	0	81.79	2.99	17.65	N
SE2477.metabat_sens.034_sub	f__Rhodobacteraceae (UID3360)	56	582	313	123	426	32	1	0	0	81.78	6.27	8.57	N
SE2485.semibin_refined.106	o__Rhizobiales (UID3449)	345	431	258	72	356	3	0	0	0	81.77	0.58	66.67	N
SE2517.metabat_spec.010	k__Bacteria (UID3187)	2258	190	119	30	156	4	0	0	0	81.77	3.36	75	N
SE2537.metabat2_refined.004	o__Rhizobiales (UID3449)	345	431	258	85	334	12	0	0	0	81.75	3.21	50	N
SE2484.concoct.062	c__Gammaproteobacteria (UID4444)	263	506	232	105	397	4	0	0	0	81.74	0.73	25	N
SE2536.concoct.089	o__Sphingomonadales (UID3310)	26	569	293	120	434	15	0	0	0	81.74	2.34	73.33	N
SE6816.rosella_refined.010	k__Bacteria (UID2565)	2921	142	87	27	114	1	0	0	0	81.69	0.57	100	Y
SE2522.semibin_refined.004	k__Bacteria (UID1453)	901	171	117	24	145	2	0	0	0	81.62	1.28	0	N
SE6842.concoct.104_sub	o__Sphingomonadales (UID3310)	26	569	293	116	439	14	0	0	0	81.57	2.51	21.43	N
SE2454.concoct.226_sub	o__Rhizobiales (UID3447)	356	416	249	69	314	31	2	0	0	81.56	8.9	91.89	N
SE2553.concoct.260_sub	o__Rhizobiales (UID3447)	356	416	249	72	330	14	0	0	0	81.52	3.36	35.71	N
SE6811.metabat2_refined.059_sub	f__Rhodobacteraceae (UID3340)	84	568	330	105	448	15	0	0	0	81.43	2.61	6.67	N
SE6798.maxbin.013	o__Rhizobiales (UID3447)	356	416	249	81	328	7	0	0	0	81.42	1.48	14.29	N
SE6828.maxbin.014_sub	c__Alphaproteobacteria (UID3422)	26	529	308	93	391	42	2	0	1	81.42	9.1	13.79	N
SE2479.metabat2_refined.013	o__Rhizobiales (UID3447)	356	416	249	73	332	11	0	0	0	81.37	3.13	63.64	N
SE2553.metabat2_refined.144	s__algicola (UID2846)	47	571	303	112	443	16	0	0	0	81.35	2.85	25	N
SE6844.concoct.024_sub	f__Rhodobacteraceae (UID3356)	67	617	330	125	469	23	0	0	0	81.35	3.97	60.87	N
SE2553.concoct.057	k__Bacteria (UID2565)	2921	146	90	30	114	2	0	0	0	81.33	0.29	100	Y
SE2454.metabat_sspec.023	o__Rhizobiales (UID3447)	356	416	249	76	297	42	1	0	0	81.33	10.44	86.67	N
SE2478.metabat2_refined.050_sub	o__Rhizobiales (UID3447)	356	416	249	83	323	10	0	0	0	81.3	1.94	40	N
SE2478.concoct.042	c__Gammaproteobacteria (UID4444)	263	507	232	87	405	15	0	0	0	81.29	2.87	13.33	N
SE6851.metabat_spec.001	o__Rhizobiales (UID3447)	356	416	249	76	320	20	0	0	0	81.28	4.26	60	N
SE2454.maxbin.081_sub	o__Rhizobiales (UID3447)	356	416	249	78	315	23	0	0	0	81.27	5.65	34.78	N
SE6833.concoct.115	k__Bacteria (UID2565)	2921	140	85	24	114	2	0	0	0	81.24	1.76	50	Y
SE2517.vamb.010	c__Alphaproteobacteria (UID3305)	564	348	229	74	271	2	1	0	0	81.22	1.75	20	N
SE6798.concoct.130	k__Bacteria (UID2569)	434	278	186	50	225	3	0	0	0	81.21	1.61	0	N
SE2498.vamb.020	o__Rhizobiales (UID3449)	345	431	258	86	337	8	0	0	0	81.2	2.07	37.5	N
SE2485.metabat2_refined.145	k__Bacteria (UID2565)	2921	143	88	36	102	5	0	0	0	81.19	4.55	0	N
SE6834.metabat2_refined.031	o__Rhizobiales (UID3447)	356	416	249	73	331	12	0	0	0	81.18	2.81	25	N
SE6773.metabat_spec.009	c__Gammaproteobacteria (UID4444)	263	506	232	85	384	37	0	0	0	81.16	7.23	56.76	N
SE2490.concoct.127_sub	f__Rhodobacteraceae (UID3360)	56	582	313	138	425	18	1	0	0	81.14	3.82	4.76	N
SE6853.metabat_spec.013	o__Rhizobiales (UID3449)	345	431	258	90	329	12	0	0	0	81.11	2.79	41.67	N
SE2506.maxbin.022_sub	f__Rhodobacteraceae (UID3360)	56	582	313	121	411	46	4	0	0	81.08	11.34	10.34	N
SE6808.concoct.067	s__algicola (UID2846)	47	571	303	90	469	10	2	0	0	81.07	1.59	0	Y
SE6783.semibin_refined.013_sub	f__Rhodobacteraceae (UID3360)	56	582	313	134	443	4	1	0	0	81.05	0.98	28.57	N
SE2451.metabat_spec.012_sub	o__Rhizobiales (UID3447)	356	416	249	74	338	4	0	0	0	81.05	1	25	N
SE2544.metabat_sspec.007	o__Rhizobiales (UID3449)	345	431	258	72	352	7	0	0	0	81.02	2.33	57.14	N
SE2451.concoct.044_sub	c__Alphaproteobacteria (UID3422)	26	529	308	109	402	18	0	0	0	81.01	3.2	22.22	N
SE6828.metabat_spec.024_sub	f__Rhodobacteraceae (UID3360)	56	582	313	114	443	24	1	0	0	81.01	5.14	88.89	N
SE6776.concoct.051_sub	o__Rhizobiales (UID3449)	345	431	258	78	344	9	0	0	0	80.98	2.26	44.44	N
SE6816.rosella_refined.156	o__Clostridiales (UID1120)	304	247	141	38	203	6	0	0	0	80.97	3.55	0	Y
SE6864.metabat_sens.006_sub	c__Alphaproteobacteria (UID3305)	564	349	230	76	265	8	0	0	0	80.9	2.23	75	Y
SE2544.rosella_refined.070	o__Rhizobiales (UID3447)	356	416	249	83	315	18	0	0	0	80.9	4.31	55.56	N
SE6838.concoct.032	c__Alphaproteobacteria (UID3337)	468	388	250	85	291	12	0	0	0	80.85	3.33	58.33	N
SE2553.metabat2_refined.115_sub	c__Gammaproteobacteria (UID4444)	263	507	232	128	352	25	2	0	0	80.84	5	19.35	N
SE2540.metabat2_refined.080_sub	f__Rhodobacteraceae (UID3356)	67	617	330	132	447	38	0	0	0	80.84	6.44	28.95	N
SE6844.metabat2_refined.047	c__Gammaproteobacteria (UID4444)	263	507	232	92	411	4	0	0	0	80.81	1.22	0	N
SE2496.semibin_refined.003	c__Gammaproteobacteria (UID4267)	119	544	284	97	438	9	0	0	0	80.81	1.92	44.44	N
SE6816.concoct.240_sub	c__Alphaproteobacteria (UID3337)	468	388	250	83	300	5	0	0	0	80.78	1.8	60	N
SE2464.concoct.173	k__Bacteria (UID1453)	901	171	117	42	121	8	0	0	0	80.76	3.37	12.5	N
SE2553.concoct.160	o__Rhizobiales (UID3447)	356	416	249	92	320	4	0	0	0	80.75	0.82	75	N
SE2543.concoct.170_sub	f__Rhodobacteraceae (UID3340)	84	568	330	117	403	48	0	0	0	80.72	9.19	2.08	Y
SE2473.concoct.154_sub	k__Bacteria (UID2565)	2921	146	90	24	119	3	0	0	0	80.71	0.72	0	Y
SE2543.maxbin.035_sub	k__Bacteria (UID1453)	901	168	114	23	137	8	0	0	0	80.7	7.02	12.5	N
SE2485.semibin_refined.127_sub	k__Bacteria (UID203)	5449	103	58	12	60	21	9	1	0	80.69	12.85	14.81	N
SE2550.semibin_refined.143_sub	o__Rhizobiales (UID3447)	356	416	249	87	325	4	0	0	0	80.68	1.2	25	N
SE2540.rosella_refine.275_0	o__Rhizobiales (UID3642)	107	485	316	83	394	8	0	0	0	80.66	1.4	25	Y
SE2477.metabat_spec.005	f__Rhodobacteraceae (UID3361)	46	654	332	134	499	21	0	0	0	80.65	3.07	19.05	N
SE6836.metabat_sens.022_sub	f__Rhodobacteraceae (UID3356)	67	616	330	137	468	10	1	0	0	80.64	2.14	15.38	N
SE2478.metabat2_refined.058_sub	o__Rhizobiales (UID3449)	345	431	258	110	289	31	1	0	0	80.63	9.5	38.24	N
SE6838.concoct.034	c__Alphaproteobacteria (UID3422)	26	529	308	107	406	16	0	0	0	80.62	2.18	37.5	N
SE6798.maxbin.016_sub	o__Rhizobiales (UID3447)	356	416	249	76	334	6	0	0	0	80.58	1.91	33.33	N
SE2543.semibin_refined.018	p__Cyanobacteria (UID2192)	79	584	458	100	478	6	0	0	0	80.57	1.06	16.67	Y
SE2454.metabat_sspec.050	c__Alphaproteobacteria (UID3305)	564	349	230	57	290	1	1	0	0	80.57	1.3	0	Y
SE2506.metabat_sspec.009_sub	f__Rhodobacteraceae (UID3356)	67	617	330	131	448	35	3	0	0	80.57	7.83	34.09	N
SE6778.metabat_sens.002	c__Gammaproteobacteria (UID4761)	52	693	297	135	549	8	1	0	0	80.56	1.57	9.09	N
SE2553.metabat2_refined.171	s__algicola (UID2846)	47	571	303	117	441	12	1	0	0	80.55	2.39	0	Y
SE2543.concoct.154	c__Alphaproteobacteria (UID3305)	564	349	230	93	248	8	0	0	0	80.54	2.14	62.5	Y
SE2454.metabat_sspec.008	o__Rhodospirillales (UID3754)	63	336	201	58	272	5	1	0	0	80.47	2.09	87.5	N
SE2485.maxbin.050_sub	o__Sphingomonadales (UID3310)	26	569	293	123	401	42	2	1	0	80.45	9.47	33.33	Y
SE2496.concoct.041_sub	k__Bacteria (UID2982)	88	230	148	41	184	4	1	0	0	80.43	3.72	14.29	N
SE6768.metabat_sspec.016	c__Alphaproteobacteria (UID3422)	26	529	308	97	427	5	0	0	0	80.42	1.03	40	N
SE6864.semibin_refined.003_sub	o__Rhizobiales (UID3447)	356	416	249	101	309	6	0	0	0	80.37	0.96	66.67	Y
SE6836.metabat_sens.015_sub	f__Rhodobacteraceae (UID3375)	32	625	283	140	473	12	0	0	0	80.33	1.64	66.67	Y
SE6801.metabat_spec.044_sub	f__Rhodobacteraceae (UID3360)	56	582	313	115	423	42	2	0	0	80.31	6.52	60.42	N
SE2454.metabat2_refined.209	c__Gammaproteobacteria (UID4266)	1097	270	172	55	213	2	0	0	0	80.29	0.87	0	Y
SE2553.metabat2_refined.207_sub	p__Bacteroidetes (UID2591)	364	302	202	61	216	23	2	0	0	80.28	8.26	6.9	Y
SE2544.semibin_refined.127_sub	c__Alphaproteobacteria (UID3305)	564	349	230	63	284	2	0	0	0	80.27	0.58	50	N
SE6803.metabat_sens.010_sub	o__Rhizobiales (UID3447)	356	416	249	86	324	6	0	0	0	80.27	0.97	0	N
SE6768.metabat_sens.022_sub	c__Alphaproteobacteria (UID3422)	26	529	308	136	361	31	1	0	0	80.27	6.79	20.59	N
SE2553.maxbin.152	k__Bacteria (UID2565)	2921	143	87	40	97	5	1	0	0	80.25	7.18	25	Y
SE6850.metabat_sens.027	f__Rhodobacteraceae (UID3340)	84	568	330	110	437	21	0	0	0	80.24	3.46	66.67	N
SE6833.concoct.023	o__Rhizobiales (UID3447)	356	416	249	73	334	9	0	0	0	80.2	1.67	22.22	N
SE2458.concoct.032	c__Alphaproteobacteria (UID3305)	564	349	230	57	283	9	0	0	0	80.19	1.51	11.11	Y
SE6811.vamb.006_sub	c__Gammaproteobacteria (UID4266)	1097	270	172	47	222	1	0	0	0	80.12	0.29	0	N
SE6816.semibin_refined.189	k__Bacteria (UID2495)	2993	147	91	30	117	0	0	0	0	80.11	0	0	Y
SE2454.concoct.108_sub	c__Alphaproteobacteria (UID3305)	564	349	230	87	255	7	0	0	0	80.11	2.54	0	Y
SE6816.concoct.161_sub	c__Alphaproteobacteria (UID3305)	564	349	230	74	246	26	3	0	0	80.09	11.35	22.86	N
SE6816.metabat2_refined.140_sub	f__Rhodobacteraceae (UID3356)	67	617	330	150	460	7	0	0	0	80.06	1.37	57.14	Y
SE2543.vamb.024_sub	k__Bacteria (UID2982)	88	230	148	48	180	2	0	0	0	79.98	1.35	0	N
SE2458.metabat_sens.002	c__Alphaproteobacteria (UID3337)	468	388	250	78	304	6	0	0	0	79.97	1.93	16.67	N
SE6833.rosella_refine.7_0	f__Rhodobacteraceae (UID3360)	56	582	313	138	425	18	1	0	0	79.95	3.27	66.67	N
SE6867.concoct.017_sub	o__Rhizobiales (UID3447)	356	416	249	88	310	17	1	0	0	79.93	4.58	80	N
SE2460.metabat2_refined.035_sub	o__Rhizobiales (UID3447)	356	416	249	71	334	11	0	0	0	79.92	3.39	27.27	N
SE6856.concoct.037_sub	o__Oceanospirillales (UID4446)	43	529	233	138	370	21	0	0	0	79.88	3.86	47.62	N
SE2485.maxbin.065_sub	s__algicola (UID2846)	47	571	303	123	433	15	0	0	0	79.85	2.33	20	Y
SE6850.metabat_spec.004_sub	o__Rhizobiales (UID3447)	356	416	249	79	328	9	0	0	0	79.85	2.37	66.67	N
SE2464.concoct.183_sub	f__Rhodobacteraceae (UID3356)	67	617	330	128	479	10	0	0	0	79.83	1.91	60	N
SE2454.metabat2_refined.197	o__Sphingomonadales (UID3310)	26	569	293	105	430	31	3	0	0	79.82	7.8	55	Y
SE6860.metabat_sspec.015	o__Rhizobiales (UID3447)	356	416	249	80	325	11	0	0	0	79.75	3.45	54.55	N
SE6840.metabat2_refined.028	f__Rhodobacteraceae (UID3375)	32	625	283	115	497	13	0	0	0	79.69	2.17	84.62	N
SE2540.concoct.201_sub	c__Gammaproteobacteria (UID4444)	263	507	232	117	375	14	1	0	0	79.69	3.44	47.06	N
SE6844.semibin_refined.024	o__Rhizobiales (UID3447)	356	416	249	80	325	11	0	0	0	79.65	2.31	45.45	N
SE2473.concoct.057_sub	c__Alphaproteobacteria (UID3422)	26	529	308	120	399	10	0	0	0	79.63	2.22	30	N
SE2464.metabat2_refined.046_sub	f__Rhodobacteraceae (UID3356)	67	617	330	113	483	21	0	0	0	79.62	3.41	33.33	N
SE6844.metabat_sens.001_sub	c__Alphaproteobacteria (UID3422)	26	529	308	130	379	19	1	0	0	79.61	4.9	81.82	N
SE2457.concoct.106_sub	o__Rhodospirillales (UID3754)	63	336	201	50	283	3	0	0	0	79.6	1.24	33.33	N
SE6784.concoct.041	o__Rhizobiales (UID3449)	345	431	258	80	343	8	0	0	0	79.58	1.87	25	N
SE2550.rosella_refined.089	s__algicola (UID2846)	47	571	303	107	459	5	0	0	0	79.49	1.1	0	N
SE6805.concoct.128_sub	o__Rhizobiales (UID3449)	345	431	258	96	316	19	0	0	0	79.39	4.74	5.26	N
SE6816.vamb.048	k__Bacteria (UID2565)	2921	146	90	22	123	1	0	0	0	79.34	1.11	0	Y
SE2553.metabat2_refined.157_sub	o__Sphingomonadales (UID3310)	26	569	293	130	427	11	1	0	0	79.32	2.93	42.86	N
SE2464.concoct.137_sub	k__Bacteria (UID2565)	2921	142	87	43	99	0	0	0	0	79.26	0	0	Y
SE6867.metabat_spec.023_sub	f__Rhodobacteraceae (UID3356)	67	617	330	122	476	19	0	0	0	79.26	2.99	15.79	N
SE2543.concoct.279	k__Bacteria (UID2565)	2921	140	85	36	101	3	0	0	0	79.24	3.53	33.33	Y
SE2548.metabat_sens.027_sub	f__Rhodobacteraceae (UID3356)	67	617	330	148	454	14	1	0	0	79.18	2.8	35.29	N
SE6808.metabat_spec.006	k__Bacteria (UID203)	5449	104	58	45	57	2	0	0	0	79.16	3.45	0	N
SE2464.concoct.145	c__Alphaproteobacteria (UID3422)	26	529	308	119	398	12	0	0	0	79.15	2.51	41.67	Y
SE2454.metabat2_refined.364_sub	k__Bacteria (UID2565)	2921	144	89	22	105	17	0	0	0	79.15	8.25	41.18	Y
SE6801.concoct.019	o__Oceanospirillales (UID4446)	43	529	233	104	421	4	0	0	0	79.13	0.47	25	N
SE6773.semibin_refined.018	o__Rhizobiales (UID3447)	356	416	249	89	321	6	0	0	0	79.1	0.87	33.33	N
SE6816.concoct.142_sub	c__Alphaproteobacteria (UID3422)	26	529	308	122	397	9	1	0	0	79.1	1.69	16.67	N
SE2544.metabat2_refined.107_sub	f__Rhodobacteraceae (UID3356)	67	617	330	144	463	10	0	0	0	79.1	1.81	80	N
SE6803.metabat_sens.006_sub	c__Gammaproteobacteria (UID4761)	52	693	297	154	515	24	0	0	0	79.1	3.06	33.33	N
SE6822.metabat_spec.004	c__Alphaproteobacteria (UID3422)	26	529	308	118	407	4	0	0	0	79.09	0.82	0	N
SE2543.vamb.096_sub	o__Rhizobiales (UID3447)	356	416	249	85	322	9	0	0	0	79.07	2.02	44.44	N
SE6842.concoct.091	f__Rhodobacteraceae (UID3356)	67	617	330	128	471	18	0	0	0	79.07	2.29	33.33	N
SE2553.semibin_refined.276	c__Alphaproteobacteria (UID3305)	564	348	229	61	278	9	0	0	0	79.04	2.54	66.67	Y
SE2548.metabat2_refined.011_sub	f__Rhodobacteraceae (UID3356)	67	617	330	146	461	10	0	0	0	79.03	1.93	60	N
SE6834.metabat2_refined.008_sub	o__Rhizobiales (UID3447)	356	416	249	86	319	11	0	0	0	79.03	3.49	36.36	N
SE2457.metabat_spec.006	o__Rhizobiales (UID3449)	345	431	258	105	310	16	0	0	0	79.03	4.05	43.75	N
SE2544.concoct.157	c__Gammaproteobacteria (UID4444)	263	507	232	108	387	12	0	0	0	79.02	3.24	58.33	N
SE6783.semibin_refined.007	c__Alphaproteobacteria (UID3305)	564	349	230	58	287	3	1	0	0	78.96	1.33	16.67	N
SE2522.concoct.016_sub	k__Bacteria (UID3187)	2258	188	117	33	154	1	0	0	0	78.92	0.85	0	N
SE6860.metabat_spec.004	c__Alphaproteobacteria (UID3305)	564	349	230	69	262	18	0	0	0	78.9	5.22	61.11	N
SE6867.metabat_spec.005_sub	f__Rhodobacteraceae (UID3356)	67	617	330	137	445	35	0	0	0	78.9	5.81	14.29	N
SE2451.metabat_spec.008_sub	f__Rhodobacteraceae (UID3356)	67	617	330	134	461	22	0	0	0	78.86	3.82	81.82	N
SE2543.concoct.256_sub	p__Bacteroidetes (UID2591)	364	302	202	65	206	30	1	0	0	78.85	10.44	6.06	N
SE2548.metabat_sens.002	o__Rhizobiales (UID3447)	356	416	249	81	328	7	0	0	0	78.84	1.65	42.86	N
SE2485.semibin_refined.129	c__Alphaproteobacteria (UID3305)	564	349	230	60	276	13	0	0	0	78.81	4.33	30.77	N
SE6864.semibin_refined.138	o__Rhizobiales (UID3447)	356	416	249	95	318	3	0	0	0	78.78	1.2	33.33	Y
SE2473.semibin_refined.155	c__Alphaproteobacteria (UID3337)	468	388	250	77	307	4	0	0	0	78.76	1.13	0	Y
SE2451.metabat2_refined.041	o__Rhizobiales (UID3449)	345	431	258	97	298	34	2	0	0	78.73	9.63	82.5	N
SE6808.metabat2_refined.075	o__Rhizobiales (UID3447)	356	416	249	92	314	10	0	0	0	78.68	2.89	50	N
SE6856.metabat_spec.008_sub	o__Rhizobiales (UID3447)	356	416	249	83	321	12	0	0	0	78.68	3.05	50	N
SE6810.concoct.088	f__Rhodobacteraceae (UID3360)	56	582	313	125	442	15	0	0	0	78.63	2.26	46.67	N
SE2553.semibin_refined.050	f__Rhodobacteraceae (UID3356)	67	617	330	143	461	13	0	0	0	78.63	2.48	46.15	Y
SE6842.concoct.115	c__Alphaproteobacteria (UID3305)	564	349	230	83	260	6	0	0	0	78.62	1.67	16.67	N
SE2540.maxbin.066_sub	c__Gammaproteobacteria (UID4444)	263	506	232	120	362	23	1	0	0	78.61	5.81	3.85	N
SE2540.metabat_sens.042	c__Gammaproteobacteria (UID4444)	263	507	232	110	384	13	0	0	0	78.57	3.52	38.46	N
SE6844.semibin_refined.028_sub	o__Rhizobiales (UID3447)	356	416	249	81	330	5	0	0	0	78.55	1.54	40	N
SE6813.vamb.019_sub	c__Alphaproteobacteria (UID3422)	26	529	308	117	402	10	0	0	0	78.54	2.3	10	N
SE6798.concoct.116_sub	f__Rhodobacteraceae (UID3356)	67	617	330	138	465	14	0	0	0	78.52	2.49	57.14	N
SE2543.concoct.108_sub	o__Rhodospirillales (UID3754)	63	336	201	98	224	13	1	0	0	78.51	4.48	81.25	Y
SE6816.maxbin.006_sub	f__Rhodobacteraceae (UID3356)	67	617	330	151	458	8	0	0	0	78.5	1.55	75	N
SE6828.concoct.126_sub	c__Alphaproteobacteria (UID3422)	26	529	308	140	374	15	0	0	0	78.49	3.58	73.33	N
SE6856.metabat_spec.019	c__Alphaproteobacteria (UID3305)	564	349	230	82	247	20	0	0	0	78.49	5.6	80	N
SE6844.concoct.090_sub	p__Bacteroidetes (UID2591)	364	298	198	63	228	6	1	0	0	78.48	2.47	0	Y
SE2510.metabat_sens.005_sub	o__Rhizobiales (UID3447)	356	416	249	86	318	12	0	0	0	78.43	2.98	33.33	N
SE6833.concoct.037_sub	f__Rhodobacteraceae (UID3356)	67	617	330	132	468	17	0	0	0	78.43	3.21	29.41	N
SE6829.metabat_spec.002	c__Alphaproteobacteria (UID3305)	564	349	230	69	273	7	0	0	0	78.42	2.43	85.71	N
SE2540.metabat_spec.006_sub	c__Alphaproteobacteria (UID3305)	564	349	230	84	233	29	3	0	0	78.42	9.35	21.05	N
SE2490.semibin_refined.048	c__Gammaproteobacteria (UID4761)	52	693	297	151	532	10	0	0	0	78.4	1.02	40	N
SE6844.concoct.037	k__Bacteria (UID2565)	2921	143	88	29	114	0	0	0	0	78.39	0	0	N
SE2522.maxbin.008	o__Rhizobiales (UID3447)	356	416	249	77	318	21	0	0	0	78.38	4.07	47.62	N
SE6813.metabat2_refined.065_sub	c__Gammaproteobacteria (UID4444)	263	507	232	106	396	5	0	0	0	78.36	0.98	20	N
SE6773.metabat_spec.013	o__Oceanospirillales (UID4446)	43	529	233	138	371	20	0	0	0	78.35	3.2	70	N
SE6853.concoct.042_sub	c__Alphaproteobacteria (UID3337)	468	388	250	115	271	2	0	0	0	78.31	0.6	100	N
SE6833.metabat_sens.038_sub	f__Rhodobacteraceae (UID3356)	67	617	330	134	470	11	2	0	0	78.31	2.48	35.29	N
SE2454.concoct.119	k__Bacteria (UID2565)	2921	142	87	30	107	5	0	0	0	78.3	5.17	40	Y
SE6813.concoct.001_sub	o__Rhizobiales (UID3447)	356	416	249	81	329	6	0	0	0	78.28	1.94	0	N
SE6783.concoct.043_sub	c__Alphaproteobacteria (UID3305)	564	349	230	74	270	5	0	0	0	78.26	1.38	20	N
SE2548.metabat_sens.023_sub	f__Rhodobacteraceae (UID3356)	67	617	330	130	465	22	0	0	0	78.26	4.46	54.55	N
SE6768.metabat_sspec.048_sub	c__Alphaproteobacteria (UID3337)	468	388	250	80	296	12	0	0	0	78.23	3.11	75	Y
SE6816.semibin_refined.141_sub	o__Rhizobiales (UID3447)	356	416	249	78	335	3	0	0	0	78.22	0.64	33.33	N
SE6776.metabat2_refined.016	c__Alphaproteobacteria (UID3422)	26	529	308	119	396	14	0	0	0	78.21	2.26	0	N
SE2544.maxbin.033_sub	c__Alphaproteobacteria (UID3337)	468	388	250	90	244	47	7	0	0	78.2	14.08	8.82	N
SE2473.concoct.038	f__Rhodobacteraceae (UID3356)	67	617	330	144	461	12	0	0	0	78.19	1.76	16.67	N
SE6864.maxbin.120_sub	k__Bacteria (UID3187)	2258	188	117	60	115	12	1	0	0	78.19	11.11	26.67	N
SE6773.metabat_sspec.009	o__Rhizobiales (UID3447)	356	416	249	82	327	7	0	0	0	78.17	1.85	28.57	N
SE6858.maxbin.001_sub	c__Alphaproteobacteria (UID3305)	564	349	230	80	261	8	0	0	0	78.12	2.12	75	N
SE2543.concoct.230_sub	k__Bacteria (UID203)	5449	104	58	47	55	2	0	0	0	78.11	2.59	0	N
SE2473.concoct.146	c__Gammaproteobacteria (UID4444)	263	507	232	103	394	10	0	0	0	78.07	1.95	20	N
SE6813.concoct.023	k__Bacteria (UID2495)	2993	147	91	22	121	4	0	0	0	78.02	2.3	50	N
SE6844.concoct.080_sub	f__Rhodobacteraceae (UID3356)	67	617	330	127	469	19	2	0	0	78.01	3.44	52	N
SE2534.concoct.033_sub	f__Vibrionaceae (UID4865)	80	922	367	126	785	11	0	0	0	77.97	1.17	27.27	N
SE2454.maxbin.099_sub	s__algicola (UID2847)	33	496	263	131	359	6	0	0	0	77.96	1.2	16.67	Y
SE2478.metabat2_refined.057	c__Gammaproteobacteria (UID4442)	899	312	185	63	208	39	2	0	0	77.87	13.11	6.67	N
SE6867.metabat_sens.001_sub	f__Rhodobacteraceae (UID3360)	56	582	313	127	436	19	0	0	0	77.85	3.77	57.89	N
SE2513.metabat_spec.002	k__Bacteria (UID2565)	2921	143	87	24	115	4	0	0	0	77.83	3.55	0	N
SE6778.metabat_sspec.003	o__Rhizobiales (UID3447)	356	416	249	99	310	7	0	0	0	77.82	2.02	57.14	N
SE6805.concoct.080_sub	f__Rhodobacteraceae (UID3375)	32	625	283	159	453	13	0	0	0	77.81	1.83	61.54	N
SE2543.concoct.252_sub	o__Rhizobiales (UID3447)	356	416	249	92	316	8	0	0	0	77.8	1.37	37.5	N
SE2544.metabat2_refined.111_sub	c__Gammaproteobacteria (UID4444)	263	507	232	137	367	3	0	0	0	77.79	0.73	33.33	N
SE2553.concoct.220_sub	k__Bacteria (UID3187)	2258	190	119	41	145	4	0	0	0	77.79	1.36	75	Y
SE2490.concoct.064_sub	f__Rhodobacteraceae (UID3375)	32	625	283	146	471	8	0	0	0	77.79	1.59	62.5	N
SE6811.concoct.190_sub	f__Rhodobacteraceae (UID3375)	32	625	283	146	470	9	0	0	0	77.77	2.21	33.33	N
SE2510.concoct.048	c__Alphaproteobacteria (UID3337)	468	388	250	116	266	6	0	0	0	77.75	1.63	0	N
SE6842.concoct.052	f__Rhodobacteraceae (UID3356)	67	617	330	156	449	12	0	0	0	77.73	1.76	16.67	N
SE6805.semibin_refined.077_sub	o__Rhizobiales (UID3447)	356	416	249	93	321	2	0	0	0	77.71	0.6	0	Y
SE6813.semibin_refined.020_sub	o__Rhizobiales (UID3447)	356	416	249	75	338	3	0	0	0	77.64	1.2	33.33	N
SE6771.metabat_spec.003_sub	o__Rhizobiales (UID3447)	356	416	249	99	306	9	2	0	0	77.64	3.58	26.67	N
SE2473.concoct.134_sub	k__Bacteria (UID3187)	2258	190	119	35	150	5	0	0	0	77.63	2.99	0	N
SE2500.metabat_spec.002	f__Rhodobacteraceae (UID3356)	67	617	330	121	479	17	0	0	0	77.61	2.2	35.29	N
SE2553.semibin_refined.278_sub	f__Rhodobacteraceae (UID3361)	46	654	332	179	464	11	0	0	0	77.58	2.38	27.27	N
SE6833.concoct.129_sub	f__Rhodobacteraceae (UID3375)	32	625	283	115	473	37	0	0	0	77.52	5.39	70.27	N
SE2553.rosella_refined.095	k__Bacteria (UID2570)	433	274	183	45	226	3	0	0	0	77.49	0.91	0	N
SE6867.metabat_spec.022	k__Bacteria (UID3187)	2258	190	119	53	136	1	0	0	0	77.43	0.84	0	N
SE2553.metabat_sens.020	o__Rhizobiales (UID3447)	356	416	249	92	312	12	0	0	0	77.43	2.46	58.33	N
SE6863.metabat2_refined.017_sub	f__Rhodobacteraceae (UID3356)	67	617	330	167	443	7	0	0	0	77.42	1.41	14.29	Y
SE2544.metabat2_refined.112_sub	c__Gammaproteobacteria (UID4444)	263	507	232	134	370	3	0	0	0	77.37	0.57	33.33	N
SE6808.concoct.088_sub	c__Alphaproteobacteria (UID3337)	468	388	250	100	282	6	0	0	0	77.32	1.35	16.67	Y
SE2522.metabat2_refined.041_sub	c__Gammaproteobacteria (UID4444)	263	503	230	98	391	14	0	0	0	77.32	3.69	28.57	Y
SE2451.metabat_sens.046_sub	c__Alphaproteobacteria (UID3422)	26	529	308	150	338	41	0	0	0	77.31	8.12	70.73	N
SE2454.vamb.186	k__Bacteria (UID2495)	2993	147	91	23	124	0	0	0	0	77.29	0	0	Y
SE6853.concoct.035	o__Sphingomonadales (UID3310)	26	569	293	117	442	10	0	0	0	77.29	0.99	10	Y
SE2454.maxbin.022_sub	c__Gammaproteobacteria (UID4444)	263	507	232	124	373	10	0	0	0	77.27	2.93	20	N
SE2537.metabat_spec.003	k__Bacteria (UID2565)	2921	143	88	31	106	6	0	0	0	77.25	3.11	33.33	N
SE2454.semibin_refined.043_sub	c__Alphaproteobacteria (UID3422)	26	529	308	122	399	8	0	0	0	77.24	1.28	75	N
SE6768.semibin_refined.028	k__Bacteria (UID203)	5449	104	58	50	52	2	0	0	0	77.24	3.45	100	Y
SE2544.concoct.167_sub	f__Rhodobacteraceae (UID3356)	67	617	330	143	451	23	0	0	0	77.23	4.39	56.52	N
SE2473.metabat_spec.028_sub	f__Rhodobacteraceae (UID3356)	67	617	330	131	469	17	0	0	0	77.17	2.67	41.18	N
SE2553.metabat_spec.018_sub	f__Rhodobacteraceae (UID3356)	67	617	330	149	452	16	0	0	0	77.13	2.7	62.5	N
SE6808.semibin_refined.031	c__Deltaproteobacteria (UID3216)	83	247	155	48	197	2	0	0	0	77.1	1.29	50	N
SE2464.semibin_refined.089_sub	f__Rhodobacteraceae (UID3361)	46	654	332	169	476	9	0	0	0	77.06	1.48	55.56	N
SE2544.metabat2_refined.060	o__Rhizobiales (UID3447)	356	416	249	100	300	16	0	0	0	77.06	3.85	31.25	N
SE2543.concoct.126	k__Bacteria (UID1453)	901	171	117	34	112	24	1	0	0	76.98	11.87	44.44	N
SE2473.metabat_sens.017	o__Rhizobiales (UID3447)	356	416	249	94	283	38	1	0	0	76.94	10.7	43.9	N
SE2454.concoct.254_sub	f__Rhodobacteraceae (UID3360)	56	582	313	143	423	16	0	0	0	76.93	2.45	68.75	N
SE2454.maxbin.072_sub	k__Bacteria (UID2565)	2921	143	88	31	101	11	0	0	0	76.93	9.87	18.18	N
SE6811.semibin_refined.115	k__Bacteria (UID1453)	901	171	117	29	141	1	0	0	0	76.92	0.85	0	Y
SE2543.concoct.147_sub	f__Rhodobacteraceae (UID3356)	67	617	330	161	439	17	0	0	0	76.91	2.79	23.53	N
SE2461.maxbin.002	f__Rhodobacteraceae (UID3360)	56	582	313	158	420	4	0	0	0	76.88	0.98	0	N
SE6842.metabat_spec.015_sub	f__Rhodobacteraceae (UID3375)	32	625	283	149	458	17	1	0	0	76.86	1.45	35	N
SE2477.metabat_sens.036	c__Alphaproteobacteria (UID3305)	564	349	230	79	242	25	3	0	0	76.86	8.16	29.41	N
SE2540.concoct.056	p__Cyanobacteria (UID2192)	79	584	458	130	439	15	0	0	0	76.85	2.59	46.67	N
SE6810.concoct.099_sub	f__Rhodobacteraceae (UID3360)	56	582	313	134	408	39	1	0	0	76.85	5.73	57.14	N
SE2485.maxbin.095_sub	c__Alphaproteobacteria (UID3305)	564	349	230	87	241	20	1	0	0	76.79	7.41	8.7	N
SE6798.concoct.111_sub	o__Rhizobiales (UID3447)	356	416	249	95	303	18	0	0	0	76.77	4.88	77.78	N
SE6820.metabat_sens.007_sub	c__Alphaproteobacteria (UID3337)	468	388	250	95	288	5	0	0	0	76.75	1.8	0	N
SE6808.metabat_spec.013_sub	f__Rhodobacteraceae (UID3375)	32	625	283	133	482	9	1	0	0	76.75	1.9	41.67	N
SE6863.metabat_spec.006	o__Rhizobiales (UID3447)	356	416	249	96	308	12	0	0	0	76.74	3.05	66.67	N
SE2507.concoct.078	c__Alphaproteobacteria (UID3422)	26	529	308	132	386	11	0	0	0	76.73	2.03	27.27	N
SE2543.concoct.116_sub	c__Alphaproteobacteria (UID3337)	468	388	250	91	291	6	0	0	0	76.7	1.73	16.67	N
SE6771.semibin_refined.010_sub	c__Alphaproteobacteria (UID3305)	564	349	230	69	277	3	0	0	0	76.66	0.2	33.33	N
SE6864.rosella_refined.128_sub	c__Gammaproteobacteria (UID4267)	119	544	284	123	412	9	0	0	0	76.62	1.96	11.11	Y
SE6864.metabat_spec.012	f__Rhodobacteraceae (UID3356)	67	617	330	140	461	16	0	0	0	76.62	2.35	37.5	N
SE2451.concoct.100	c__Alphaproteobacteria (UID3337)	468	388	250	79	300	9	0	0	0	76.57	2.22	44.44	Y
SE2454.maxbin.015_sub	c__Alphaproteobacteria (UID3422)	26	529	308	124	361	44	0	0	0	76.54	8.84	59.09	N
SE2544.metabat2_refined.059_sub	f__Rhodobacteraceae (UID3356)	67	617	330	173	422	22	0	0	0	76.53	5.18	63.64	N
SE2543.metabat2_refined.030_sub	k__Bacteria (UID1453)	901	168	114	43	122	3	0	0	0	76.5	1.41	66.67	Y
SE6798.semibin_refined.052	o__Sphingomonadales (UID3310)	26	569	293	144	418	7	0	0	0	76.45	1.52	0	N
SE6805.concoct.127	p__Bacteroidetes (UID2591)	364	302	202	62	237	3	0	0	0	76.42	1.16	33.33	Y
SE2478.vamb.011	k__Bacteria (UID2570)	433	274	183	48	225	1	0	0	0	76.39	0.55	0	Y
SE2485.concoct.194	c__Alphaproteobacteria (UID3305)	564	349	230	87	246	16	0	0	0	76.39	4.49	12.5	Y
SE2550.vamb.023_sub	c__Alphaproteobacteria (UID3305)	564	349	230	89	254	6	0	0	0	76.38	2.17	16.67	N
SE2517.metabat2_refined.041	o__Rhizobiales (UID3447)	356	416	249	101	311	3	1	0	0	76.3	1.2	33.33	Y
SE6811.metabat2_refined.088_sub	o__Rhizobiales (UID3447)	356	416	249	93	304	19	0	0	0	76.25	3.81	21.05	N
SE6820.concoct.036_sub	f__Rhodobacteraceae (UID3375)	32	625	283	142	476	7	0	0	0	76.15	1.03	28.57	N
SE2490.metabat_sspec.011_sub	k__Bacteria (UID2565)	2921	140	85	35	105	0	0	0	0	76.06	0	0	N
SE2543.concoct.109	o__Sphingomonadales (UID3310)	26	569	293	122	430	17	0	0	0	76.05	3.34	82.35	N
SE2473.concoct.116_sub	k__Bacteria (UID2569)	434	278	186	55	218	5	0	0	0	76	1.31	20	N
SE6768.metabat_spec.026_sub	c__Alphaproteobacteria (UID3305)	564	349	230	96	246	7	0	0	0	75.99	1.38	0	N
SE2464.vamb.026	o__Rhizobiales (UID3447)	356	416	249	94	311	11	0	0	0	75.95	2.24	27.27	N
SE2543.semibin_refined.247	o__Rhizobiales (UID3447)	356	416	249	97	314	5	0	0	0	75.88	1.06	60	Y
SE6816.metabat2_refined.013_sub	k__Bacteria (UID3187)	2258	182	112	53	125	4	0	0	0	75.87	1.25	0	Y
SE2506.concoct.101	c__Alphaproteobacteria (UID3422)	26	529	308	135	362	31	1	0	0	75.86	6.34	50	N
SE6773.concoct.017_sub	o__Rhizobiales (UID3447)	356	416	249	84	329	3	0	0	0	75.81	0.25	33.33	N
SE6825.metabat_spec.010	f__Rhodobacteraceae (UID3340)	84	568	330	150	405	13	0	0	0	75.79	2.24	53.85	N
SE6828.concoct.034	c__Gammaproteobacteria (UID4444)	263	507	232	106	389	12	0	0	0	75.76	2.2	33.33	N
SE2485.metabat2_refined.030_sub	c__Gammaproteobacteria (UID4274)	112	581	290	119	438	24	0	0	0	75.72	4.48	25	Y
SE6798.concoct.055	k__Bacteria (UID203)	5449	104	58	19	82	3	0	0	0	75.68	5.17	0	N
SE2553.metabat_spec.008_sub	k__Bacteria (UID1453)	901	171	117	41	120	10	0	0	0	75.68	6.51	70	N
SE2451.metabat_spec.045_sub	o__Rhodospirillales (UID3754)	63	336	201	69	261	6	0	0	0	75.67	2.02	50	N
SE6773.metabat_sens.011_sub	f__Rhodobacteraceae (UID3360)	56	582	313	147	410	22	3	0	0	75.67	3.27	58.06	N
SE2454.concoct.145_sub	c__Alphaproteobacteria (UID3422)	26	529	308	160	340	29	0	0	0	75.65	4.69	68.97	N
SE2522.semibin_refined.008	f__Rhodobacteraceae (UID3375)	32	625	283	160	445	20	0	0	0	75.62	4.03	45	N
SE2536.rosella_refined.006	c__Gammaproteobacteria (UID4443)	356	451	270	94	355	2	0	0	0	75.6	0.17	0	N
SE2550.concoct.140	c__Alphaproteobacteria (UID3422)	26	529	308	146	373	10	0	0	0	75.56	2.51	50	N
SE2543.maxbin.009_sub	f__Rhodobacteraceae (UID3356)	67	617	330	174	426	17	0	0	0	75.54	1.96	35.29	Y
SE2454.concoct.279_sub	c__Alphaproteobacteria (UID3422)	26	529	308	128	334	63	4	0	0	75.53	13.27	89.33	N
SE6829.metabat_spec.010_sub	f__Rhodobacteraceae (UID3356)	67	617	330	137	447	31	2	0	0	75.49	5.42	62.16	N
SE6811.concoct.105	c__Gammaproteobacteria (UID4444)	263	507	232	98	401	8	0	0	0	75.47	1.35	25	N
SE2553.metabat2_refined.197_sub	c__Alphaproteobacteria (UID3305)	564	349	230	105	233	11	0	0	0	75.47	3.19	72.73	N
SE2500.metabat_sspec.004	c__Alphaproteobacteria (UID3305)	564	349	230	83	260	6	0	0	0	75.44	1.6	0	N
SE6844.concoct.085	k__Bacteria (UID2565)	2921	143	88	40	101	2	0	0	0	75.43	0.67	0	N
SE2506.semibin_refined.008	k__Bacteria (UID2565)	2921	142	87	32	108	2	0	0	0	75.41	2.3	100	Y
SE2496.maxbin.008_sub	c__Gammaproteobacteria (UID4761)	52	693	297	174	504	15	0	0	0	75.38	2.75	40	N
SE2485.concoct.037	c__Gammaproteobacteria (UID4267)	119	544	284	156	373	15	0	0	0	75.38	3.31	20	Y
SE6813.semibin_refined.018	c__Alphaproteobacteria (UID3337)	468	388	250	89	295	4	0	0	0	75.36	1.01	25	N
SE6856.concoct.053_sub	c__Gammaproteobacteria (UID4444)	263	507	232	98	399	10	0	0	0	75.33	2.14	60	N
SE6856.metabat2_refined.033	o__Rhizobiales (UID3449)	345	431	258	107	307	16	1	0	0	75.32	4.96	84.21	N
SE2544.concoct.120	s__algicola (UID2846)	47	571	303	144	417	9	1	0	0	75.3	2.27	33.33	N
SE6858.metabat_spec.030_sub	c__Gammaproteobacteria (UID4444)	263	506	232	135	355	16	0	0	0	75.27	2.63	0	N
SE6792.maxbin.001	c__Alphaproteobacteria (UID3305)	564	349	230	80	258	10	1	0	0	75.26	3.39	92.31	N
SE6864.semibin_refined.159_sub	f__Rhodobacteraceae (UID3360)	56	582	313	176	397	9	0	0	0	75.24	2.24	55.56	Y
SE2461.metabat_sens.019	c__Gammaproteobacteria (UID4444)	263	504	231	119	365	20	0	0	0	75.22	4.33	15	N
SE2454.rosella_refine.246_0	c__Alphaproteobacteria (UID3305)	564	349	230	87	242	18	2	0	0	75.21	7.62	16.67	Y
SE2454.rosella_refined.219	k__Bacteria (UID2495)	2993	143	89	26	115	2	0	0	0	75.18	2.25	0	Y
SE6863.metabat2_refined.022_sub	f__Rhodobacteraceae (UID3360)	56	582	313	152	416	14	0	0	0	75.18	2.66	78.57	N
SE2454.concoct.181_sub	k__Bacteria (UID2982)	88	230	148	64	162	4	0	0	0	75.16	2.36	0	Y
SE2544.concoct.123	c__Gammaproteobacteria (UID4444)	263	504	231	117	377	10	0	0	0	75.14	2.16	40	N
SE2543.semibin_refined.021_sub	f__Rhodobacteraceae (UID3356)	67	617	330	153	455	9	0	0	0	75.09	1.34	0	Y
SE6801.concoct.059_sub	f__Rhodobacteraceae (UID3356)	67	617	330	151	446	19	1	0	0	75.05	3.53	40.91	N
SE6816.rosella_refined.188	k__Bacteria (UID1453)	901	171	117	32	138	1	0	0	0	75.04	0.85	0	N
SE6771.metabat_spec.033	f__Rhodobacteraceae (UID3360)	56	582	313	150	412	18	2	0	0	75.03	4.26	20.83	N
SE6811.semibin_refined.097_sub	c__Alphaproteobacteria (UID3305)	564	349	230	86	252	11	0	0	0	75.01	3.72	0	Y
SE6792.metabat_sens.006_sub	o__Rhizobiales (UID3447)	356	416	249	117	293	5	1	0	0	74.88	2.09	25	N
SE2460.metabat_sens.011_sub	f__Rhodobacteraceae (UID3356)	67	617	330	162	383	71	1	0	0	74.88	13	36.49	N
SE2506.concoct.013_sub	f__Rhodobacteraceae (UID3356)	67	617	330	154	455	8	0	0	0	74.87	1.87	37.5	N
SE2473.concoct.148_sub	c__Alphaproteobacteria (UID3305)	564	349	230	96	236	17	0	0	0	74.87	5.45	35.29	N
SE2498.concoct.026	k__Bacteria (UID3187)	2258	188	117	53	131	4	0	0	0	74.85	2.56	0	N
SE2458.concoct.005	f__Rhodobacteraceae (UID3356)	67	617	330	140	467	10	0	0	0	74.83	1.48	60	N
SE6864.rosella_refined.015	k__Bacteria (UID1452)	924	151	101	28	123	0	0	0	0	74.75	0	0	Y
SE2484.semibin_refined.025	k__Bacteria (UID2570)	433	274	183	52	218	4	0	0	0	74.75	1.09	0	N
SE2461.concoct.006_sub	f__Rhodobacteraceae (UID3356)	67	617	330	147	463	7	0	0	0	74.75	1.77	71.43	N
SE6805.metabat2_refined.064_sub	f__Rhodobacteraceae (UID3356)	67	617	330	150	394	69	4	0	0	74.75	12.21	35.8	N
SE2454.concoct.067_sub	o__Rhizobiales (UID3447)	356	413	248	116	261	31	5	0	0	74.73	10.51	41.3	N
SE6853.concoct.076_sub	k__Bacteria (UID2495)	2993	147	91	55	92	0	0	0	0	74.67	0	0	Y
SE2544.metabat2_refined.041	o__Rhizobiales (UID3447)	356	416	249	100	310	6	0	0	0	74.67	1.85	33.33	N
SE2457.metabat_sens.013_sub	c__Alphaproteobacteria (UID3422)	26	529	308	161	350	17	1	0	0	74.63	4.46	45	N
SE6836.metabat_spec.004_sub	f__Rhodobacteraceae (UID3356)	67	617	330	154	444	19	0	0	0	74.6	3.83	31.58	N
SE2457.semibin_refined.014	o__Rhizobiales (UID3447)	356	416	249	99	310	7	0	0	0	74.59	1.35	28.57	N
SE2473.metabat2_refined.119_sub	o__Rhizobiales (UID3447)	356	416	249	103	296	16	1	0	0	74.52	4.38	73.68	N
SE6863.concoct.048	k__Bacteria (UID2565)	2921	143	88	34	105	4	0	0	0	74.52	4.55	0	N
SE2543.semibin_refined.080_sub	o__Rhizobiales (UID3447)	356	416	249	112	299	5	0	0	0	74.51	1.81	80	N
SE6864.concoct.210_sub	o__Rhizobiales (UID3447)	356	416	249	112	291	12	1	0	0	74.48	4.59	60	N
SE6803.metabat2_refined.017_sub	o__Rhizobiales (UID3447)	356	416	249	100	311	5	0	0	0	74.46	1.41	40	N
SE2550.concoct.071	f__Rhodobacteraceae (UID3361)	46	654	332	165	468	20	1	0	0	74.46	3.38	39.13	N
SE2464.concoct.105_sub	p__Proteobacteria (UID3880)	1495	261	164	78	180	3	0	0	0	74.43	1.27	0	N
SE6816.semibin_refined.006	o__Sphingomonadales (UID3310)	26	569	293	147	416	6	0	0	0	74.36	1.3	33.33	N
SE6792.metabat_sens.009_sub	o__Rhizobiales (UID3447)	356	416	249	98	308	10	0	0	0	74.34	2.14	20	N
SE6811.rosella_refined.099	c__Alphaproteobacteria (UID3305)	564	349	230	86	259	4	0	0	0	74.33	1.1	50	Y
SE6836.concoct.073	p__Bacteroidetes (UID2591)	364	302	202	69	210	22	1	0	0	74.33	4.03	4	N
SE2478.metabat2_refined.043_sub	f__Rhodobacteraceae (UID3356)	67	617	330	162	428	26	1	0	0	74.32	5.25	31.03	N
SE6792.maxbin.035	f__Rhodobacteraceae (UID3356)	67	615	329	153	449	13	0	0	0	74.26	2.81	15.38	N
SE6816.concoct.147_sub	c__Alphaproteobacteria (UID3305)	564	349	230	90	246	13	0	0	0	74.24	4.17	15.38	N
SE2485.vamb.045	k__Bacteria (UID2570)	433	274	183	52	221	1	0	0	0	74.21	0.55	0	N
SE2543.metabat2_refined.090_sub	f__Rhodobacteraceae (UID3356)	67	617	330	175	434	8	0	0	0	74.18	0.95	50	Y
SE6864.concoct.223_sub	f__Rhodobacteraceae (UID3356)	67	617	330	174	439	4	0	0	0	74.16	0.97	25	N
SE2464.concoct.065_sub	c__Gammaproteobacteria (UID4267)	119	544	284	132	397	15	0	0	0	74.15	3.33	33.33	N
SE2543.concoct.221	k__Bacteria (UID2569)	434	278	186	72	202	4	0	0	0	74.12	1.88	25	Y
SE6836.concoct.001_sub	c__Alphaproteobacteria (UID3422)	26	529	308	136	383	10	0	0	0	74.09	1.96	20	N
SE2464.concoct.185	o__Rhizobiales (UID3447)	356	416	249	104	299	13	0	0	0	74.07	2.54	61.54	Y
SE2451.concoct.058	c__Alphaproteobacteria (UID3305)	564	349	230	82	244	23	0	0	0	74.07	7.61	4.35	N
SE2543.concoct.208_sub	f__Rhodobacteraceae (UID3340)	84	568	330	158	394	16	0	0	0	74.06	2.8	50	Y
SE6816.concoct.082_sub	k__Bacteria (UID1452)	924	161	108	40	117	4	0	0	0	74.06	3.09	25	Y
SE6805.metabat_sens.008_sub	f__Rhodobacteraceae (UID3360)	56	582	313	166	367	49	0	0	0	74.04	8.31	48.98	N
SE2498.concoct.021	f__Rhodobacteraceae (UID3356)	67	617	330	153	447	17	0	0	0	74.02	2.62	23.53	N
SE6798.maxbin.041_sub	o__Sphingomonadales (UID3310)	26	569	293	153	382	34	0	0	0	73.99	6.37	8.82	N
SE2464.vamb.046	k__Bacteria (UID2570)	433	274	183	59	212	3	0	0	0	73.91	0.84	33.33	N
SE6853.metabat2_refined.025	c__Deltaproteobacteria (UID3216)	83	247	155	73	168	6	0	0	0	73.91	3.12	16.67	Y
SE2543.semibin_refined.059	k__Bacteria (UID2982)	88	230	148	57	170	3	0	0	0	73.87	1.15	33.33	N
SE2540.concoct.042_sub	c__Gammaproteobacteria (UID4201)	1164	275	174	71	200	2	2	0	0	73.87	2.3	0	Y
SE2536.concoct.038	f__Rhodobacteraceae (UID3356)	67	617	330	164	438	15	0	0	0	73.87	2.83	20	N
SE2477.metabat2_refined.012	o__Rhizobiales (UID3447)	356	416	249	98	310	8	0	0	0	73.86	1.6	75	N
SE2553.semibin_refined.039_sub	o__Rhizobiales (UID3447)	356	416	249	100	305	10	1	0	0	73.8	3.45	30.77	N
SE6851.metabat_spec.009	c__Alphaproteobacteria (UID3305)	564	349	230	82	262	5	0	0	0	73.75	1.52	0	N
SE2478.metabat2_refined.056	o__Rhizobiales (UID3447)	356	416	249	101	308	7	0	0	0	73.75	2.14	57.14	N
SE2478.concoct.030	c__Alphaproteobacteria (UID3422)	26	529	308	135	391	3	0	0	0	73.7	0.57	0	N
SE2522.semibin_refined.006	k__Bacteria (UID1452)	924	151	101	37	113	1	0	0	0	73.64	0.99	0	N
SE2543.maxbin.158_sub	c__Gammaproteobacteria (UID4444)	263	507	232	131	361	15	0	0	0	73.6	3.35	20	N
SE6828.maxbin.001_sub	c__Alphaproteobacteria (UID3305)	564	349	230	86	256	7	0	0	0	73.57	2.61	71.43	N
SE6801.semibin_refined.029	o__Rhizobiales (UID3447)	356	416	249	109	304	3	0	0	0	73.56	0.8	0	N
SE6842.maxbin.026_sub	c__Gammaproteobacteria (UID4761)	52	693	297	201	474	18	0	0	0	73.56	1.67	55.56	N
SE2540.concoct.045_sub	c__Gammaproteobacteria (UID4761)	52	693	297	181	477	34	1	0	0	73.55	2.99	56.76	N
SE2540.metabat_spec.037_sub	c__Alphaproteobacteria (UID3305)	564	349	230	93	241	15	0	0	0	73.54	4.1	13.33	N
SE2473.metabat_spec.027	o__Rhizobiales (UID3449)	345	431	258	114	302	15	0	0	0	73.53	3.51	93.33	N
SE6851.concoct.047_sub	f__Rhodobacteraceae (UID3360)	56	582	313	160	404	18	0	0	0	73.5	2.11	11.11	N
SE2553.concoct.189	c__Alphaproteobacteria (UID3305)	564	349	230	84	226	33	5	1	0	73.5	14.34	3.7	N
SE6864.concoct.110	c__Alphaproteobacteria (UID3305)	564	349	230	89	251	9	0	0	0	73.45	2.19	55.56	Y
SE6801.maxbin.027_sub	c__Gammaproteobacteria (UID4761)	52	693	297	199	465	29	0	0	0	73.45	4.49	13.79	N
SE2537.metabat2_refined.032	f__Rhodobacteraceae (UID3356)	67	617	330	157	445	15	0	0	0	73.43	2.23	93.33	N
SE6842.concoct.054_sub	f__Rhodobacteraceae (UID3360)	56	582	313	169	385	28	0	0	0	73.4	5.35	50	N
SE6811.semibin_refined.070_sub	o__Rhizobiales (UID3447)	356	416	249	96	320	0	0	0	0	73.36	0	0	N
SE6853.metabat_spec.004	c__Alphaproteobacteria (UID3305)	564	349	230	103	240	6	0	0	0	73.32	2.03	50	N
SE2460.concoct.003	o__Rhizobiales (UID3447)	356	416	249	95	309	11	0	1	0	73.32	3.21	82.35	N
SE2485.metabat_sens.006_sub	f__Rhodobacteraceae (UID3340)	84	568	330	146	396	26	0	0	0	73.31	5.1	46.15	N
SE2479.metabat2_refined.018	f__Rhodobacteraceae (UID3360)	56	582	313	155	399	27	1	0	0	73.3	4.8	33.33	N
SE6792.metabat_spec.015_sub	c__Gammaproteobacteria (UID4444)	263	507	232	132	367	8	0	0	0	73.29	1.77	25	N
SE6816.concoct.178_sub	k__Bacteria (UID2495)	2993	147	91	47	99	1	0	0	0	73.27	0.1	0	N
SE6811.metabat_spec.001	f__Rhodobacteraceae (UID3360)	56	582	313	170	408	4	0	0	0	73.27	0.91	75	N
SE6838.metabat_sens.014_sub	f__Rhodobacteraceae (UID3360)	56	582	313	160	406	15	1	0	0	73.27	3.76	44.44	N
SE6850.metabat_spec.003	o__Rhizobiales (UID3447)	356	416	249	101	303	11	0	0	1	73.26	2.67	28.57	N
SE2464.concoct.169_sub	k__Bacteria (UID2565)	2921	140	85	37	102	1	0	0	0	73.23	0.11	100	Y
SE6792.concoct.042	o__Oceanospirillales (UID4446)	43	529	233	125	394	10	0	0	0	73.21	1.71	50	N
SE6801.metabat_sens.012_sub	o__Sphingomonadales (UID3310)	26	569	293	170	385	14	0	0	0	73.15	2.24	0	N
SE6864.semibin_refined.019	c__Alphaproteobacteria (UID3305)	564	349	230	82	262	5	0	0	0	73.06	1.88	20	Y
SE2550.metabat_spec.006_sub	f__Rhodobacteraceae (UID3356)	67	617	330	170	422	25	0	0	0	73.05	2.77	52	N
SE6858.concoct.051_sub	p__Proteobacteria (UID3880)	1495	261	164	74	183	4	0	0	0	73	0.96	25	N
SE6813.concoct.022	k__Bacteria (UID2495)	2993	147	91	45	102	0	0	0	0	72.96	0	0	N
SE6805.metabat_sens.007_sub	c__Gammaproteobacteria (UID4761)	52	693	297	191	494	8	0	0	0	72.88	1.69	25	N
SE6805.metabat2_refined.044_sub	f__Rhodobacteraceae (UID3356)	67	617	330	155	445	17	0	0	0	72.87	1.93	29.41	N
SE6801.maxbin.022	c__Alphaproteobacteria (UID3422)	26	529	308	150	366	12	1	0	0	72.83	2.96	13.33	N
SE2534.metabat_sens.005	c__Gammaproteobacteria (UID4267)	119	544	284	145	372	26	1	0	0	72.83	5.04	10.34	N
SE6840.metabat2_refined.018	c__Alphaproteobacteria (UID3422)	26	529	308	149	369	11	0	0	0	72.82	2.82	36.36	N
SE2553.metabat2_refined.176	k__Bacteria (UID3187)	2258	188	117	42	135	11	0	0	0	72.81	5.19	72.73	N
SE2543.concoct.103_sub	o__Rhizobiales (UID3447)	356	416	249	118	290	8	0	0	0	72.8	0.96	37.5	N
SE6822.metabat_sens.004_sub	c__Alphaproteobacteria (UID3422)	26	529	308	159	323	45	2	0	0	72.78	11.46	62.75	N
SE2543.maxbin.011_sub	c__Alphaproteobacteria (UID3422)	26	529	308	173	345	10	1	0	0	72.73	2.49	0	N
SE2473.metabat2_refined.074_sub	f__Rhodobacteraceae (UID3356)	67	617	330	174	425	18	0	0	0	72.7	3.42	11.11	N
SE2473.metabat_spec.032_sub	o__Rhizobiales (UID3447)	356	416	249	121	291	4	0	0	0	72.67	1.2	0	N
SE6867.metabat2_refined.034_sub	c__Alphaproteobacteria (UID3305)	564	349	230	98	246	5	0	0	0	72.64	1.45	40	N
SE2540.rosella_refined.030_sub	c__Alphaproteobacteria (UID3305)	564	349	230	118	222	9	0	0	0	72.64	2.53	33.33	Y
SE2553.maxbin.114_sub	k__Bacteria (UID2565)	2921	144	89	36	105	3	0	0	0	72.6	2.81	33.33	Y
SE6836.concoct.067_sub	f__Rhodobacteraceae (UID3361)	46	654	332	173	465	15	1	0	0	72.59	2.16	27.78	Y
SE2454.semibin_refined.054	k__Bacteria (UID2565)	2921	142	87	42	98	2	0	0	0	72.56	1.15	100	N
SE6813.concoct.002_sub	f__Rhodobacteraceae (UID3356)	67	617	330	172	430	15	0	0	0	72.53	2.97	53.33	N
SE2468.concoct.040	k__Bacteria (UID2565)	2921	140	85	36	103	1	0	0	0	72.52	1.18	0	N
SE2537.concoct.043_sub	f__Rhodobacteraceae (UID3361)	46	654	332	184	457	13	0	0	0	72.51	2.08	7.69	N
SE6853.metabat_spec.001	o__Rhizobiales (UID3447)	356	416	249	107	291	17	1	0	0	72.51	4.2	50	N
SE2454.concoct.152_sub	c__Alphaproteobacteria (UID3305)	564	349	230	105	234	10	0	0	0	72.5	3.04	60	Y
SE6833.metabat_sens.014_sub	f__Rhodobacteraceae (UID3361)	46	654	332	194	448	12	0	0	0	72.45	1.28	16.67	N
SE2543.concoct.051_sub	f__Rhodobacteraceae (UID3340)	84	568	330	162	389	17	0	0	0	72.38	3.55	58.82	N
SE2543.metabat_spec.018	k__Bacteria (UID2570)	433	274	183	58	203	12	1	0	0	72.26	5.07	20	N
SE2540.metabat_sens.032_sub	k__Bacteria (UID2982)	88	230	148	62	147	19	2	0	0	72.26	8.22	4	N
SE6833.metabat2_refined.077_sub	o__Rhizobiales (UID3447)	356	416	249	105	302	8	1	0	0	72.25	2.01	54.55	N
SE6811.concoct.058_sub	c__Alphaproteobacteria (UID3337)	468	388	250	129	253	6	0	0	0	72.19	1.1	33.33	N
SE2517.metabat_spec.008	k__Bacteria (UID1453)	901	171	117	45	119	6	1	0	0	72.12	3.95	11.11	N
SE6842.metabat2_refined.001_sub	f__Rhodobacteraceae (UID3356)	67	617	330	164	423	28	2	0	0	72.12	5.36	73.53	N
SE6788.metabat_sspec.002	f__Rhodobacteraceae (UID3375)	32	625	283	172	441	12	0	0	0	72.11	1.76	41.67	N
SE6798.metabat2_refined.040_sub	f__Rhodobacteraceae (UID3360)	56	582	313	171	393	17	1	0	0	72.1	3.44	20	N
SE2477.concoct.080	f__Rhodobacteraceae (UID3360)	56	582	313	176	398	8	0	0	0	72.09	1.28	50	N
SE6810.metabat2_refined.024	o__Rhizobiales (UID3447)	356	416	249	109	298	9	0	0	0	72.08	3.01	55.56	N
SE2485.concoct.140	k__Bacteria (UID2565)	2921	143	88	30	112	1	0	0	0	72.06	0.1	0	Y
SE2485.concoct.128_sub	f__Rhodobacteraceae (UID3356)	67	617	330	178	388	50	1	0	0	72.02	8.54	88.68	Y
SE2544.metabat_sens.010_sub	c__Alphaproteobacteria (UID3422)	26	529	308	173	349	7	0	0	0	72.01	1.14	71.43	N
SE6838.concoct.075_sub	f__Rhodobacteraceae (UID3375)	32	625	283	170	438	17	0	0	0	71.96	2.2	58.82	N
SE2522.metabat2_refined.010_sub	k__Bacteria (UID3187)	2258	190	119	46	139	5	0	0	0	71.93	2.94	20	N
SE2485.metabat2_refined.061_sub	f__Rhodobacteraceae (UID3356)	67	617	330	184	397	34	2	0	0	71.92	6.26	12.5	N
SE2553.concoct.224_sub	c__Gammaproteobacteria (UID4267)	119	544	284	168	317	54	4	0	1	71.89	11.23	17.11	N
SE6816.maxbin.053_sub	o__Sphingomonadales (UID3310)	26	569	293	176	387	6	0	0	0	71.82	1.11	0	N
SE2543.metabat_sens.008_sub	f__Rhodobacteraceae (UID3356)	67	617	330	189	418	10	0	0	0	71.79	1.44	30	N
SE6808.metabat2_refined.076	c__Gammaproteobacteria (UID4267)	119	544	284	135	390	19	0	0	0	71.78	3.65	10.53	N
SE2478.concoct.064_sub	f__Rhodobacteraceae (UID3356)	67	617	330	155	452	9	1	0	0	71.77	1.7	41.67	N
SE2484.metabat_spec.002	c__Gammaproteobacteria (UID4444)	263	507	232	140	355	12	0	0	0	71.76	1.5	25	N
SE6851.metabat2_refined.035_sub	f__Rhodobacteraceae (UID3360)	56	582	313	173	387	21	1	0	0	71.75	4.85	12.5	Y
SE2498.metabat2_refined.040	k__Bacteria (UID3187)	2258	188	117	49	134	5	0	0	0	71.74	1.55	20	N
SE6803.semibin_refined.002_sub	k__Bacteria (UID203)	5449	104	58	54	50	0	0	0	0	71.72	0	0	N
SE2451.concoct.084_sub	o__Rhizobiales (UID3447)	356	416	249	122	288	6	0	0	0	71.6	1.62	66.67	N
SE2485.semibin_refined.128	c__Alphaproteobacteria (UID3305)	564	349	230	86	258	3	2	0	0	71.6	2.65	22.22	N
SE6842.concoct.093_sub	f__Rhodobacteraceae (UID3360)	56	582	313	172	390	19	1	0	0	71.59	3.3	22.73	N
SE2454.concoct.079_sub	k__Bacteria (UID2565)	2921	146	90	39	104	3	0	0	0	71.59	3.33	66.67	N
SE2457.concoct.047_sub	k__Bacteria (UID2565)	2921	146	90	33	110	3	0	0	0	71.58	3.33	0	N
SE6834.metabat_spec.005	f__Rhodobacteraceae (UID3356)	67	617	330	163	422	32	0	0	0	71.58	5.52	65.62	N
SE2550.semibin_refined.109	c__Deltaproteobacteria (UID3216)	83	247	155	70	171	6	0	0	0	71.49	2.13	0	Y
SE2543.concoct.254	s__algicola (UID2846)	47	571	303	167	400	4	0	0	0	71.46	0.84	25	N
SE2458.metabat_spec.005	o__Rhizobiales (UID3447)	356	416	249	127	282	7	0	0	0	71.44	1.65	42.86	N
SE2464.concoct.170_sub	c__Gammaproteobacteria (UID4443)	356	451	270	123	318	10	0	0	0	71.44	2.03	10	N
SE2479.metabat2_refined.022	k__Bacteria (UID2570)	433	274	183	59	210	5	0	0	0	71.38	1.6	20	N
SE2506.metabat2_refined.056_sub	o__Rhizobiales (UID3449)	345	431	258	133	287	11	0	0	0	71.35	2.6	54.55	N
SE6811.concoct.032_sub	c__Alphaproteobacteria (UID3305)	564	349	230	94	249	6	0	0	0	71.34	1.78	0	N
SE6816.maxbin.012_sub	f__Rhodobacteraceae (UID3375)	32	625	283	159	454	12	0	0	0	71.29	1.97	41.67	N
SE2454.semibin_refined.088	k__Bacteria (UID1452)	924	151	101	32	117	2	0	0	0	71.29	1.98	0	Y
SE6816.concoct.189_sub	k__Bacteria (UID1453)	901	171	117	56	114	1	0	0	0	71.27	0.85	0	Y
SE2534.metabat2_refined.016_sub	c__Gammaproteobacteria (UID4442)	899	312	185	76	222	14	0	0	0	71.27	1.93	7.14	N
SE2454.semibin_refined.076	k__Bacteria (UID2565)	2921	146	90	40	105	1	0	0	0	71.23	1.11	0	Y
SE6863.metabat_sens.018	c__Alphaproteobacteria (UID3305)	564	349	230	88	254	7	0	0	0	71.22	2.65	28.57	N
SE2537.metabat_spec.001_sub	c__Alphaproteobacteria (UID3422)	26	529	308	177	322	30	0	0	0	71.22	6.63	43.33	N
SE2473.concoct.079	k__Bacteria (UID2329)	174	149	89	35	112	2	0	0	0	71.18	2.25	0	Y
SE6808.metabat2_refined.025_sub	f__Rhodobacteraceae (UID3356)	67	617	330	151	447	19	0	0	0	71.13	2.23	31.58	N
SE6768.concoct.145_sub	f__Rhodobacteraceae (UID3356)	67	617	330	171	431	15	0	0	0	71.11	2.94	73.33	N
SE2478.metabat_sens.025	f__Rhodobacteraceae (UID3356)	67	617	330	171	420	26	0	0	0	71.1	4.14	69.23	N
SE2490.concoct.023_sub	k__Bacteria (UID3187)	2258	188	117	57	128	3	0	0	0	71.09	1.76	0	N
SE6850.concoct.090	c__Deltaproteobacteria (UID3216)	83	247	155	61	181	5	0	0	0	71.09	1.99	0	N
SE2498.metabat_spec.005_sub	f__Rhodobacteraceae (UID3356)	67	617	330	207	402	8	0	0	0	71.04	1.54	75	Y
SE2544.metabat2_refined.021_sub	f__Rhodobacteraceae (UID3356)	67	617	330	168	426	22	1	0	0	71.01	3.64	36	N
SE2478.metabat2_refined.044	f__Rhodobacteraceae (UID3356)	67	617	330	164	445	8	0	0	0	70.99	1.04	25	N
SE6810.metabat2_refined.032	c__Deltaproteobacteria (UID3216)	83	247	155	61	180	6	0	0	0	70.99	3.55	0	Y
SE6856.concoct.068	c__Alphaproteobacteria (UID3305)	564	349	230	92	229	28	0	0	0	70.98	9.05	96.43	N
SE6828.vamb.009_sub	c__Gammaproteobacteria (UID4267)	119	544	284	159	381	4	0	0	0	70.89	0.73	25	N
SE2461.metabat_sens.003_sub	f__Rhodobacteraceae (UID3340)	84	568	330	159	393	16	0	0	0	70.85	2.22	75	N
SE6808.metabat_sens.008_sub	k__Bacteria (UID203)	5449	104	58	54	50	0	0	0	0	70.8	0	0	Y
SE2454.maxbin.177_sub	c__Alphaproteobacteria (UID3422)	26	529	308	180	326	20	2	1	0	70.76	5.44	9.38	N
SE6838.metabat2_refined.045	k__Bacteria (UID2565)	2921	143	88	43	98	2	0	0	0	70.73	1.7	0	N
SE6805.concoct.019	k__Bacteria (UID2565)	2921	143	88	36	103	4	0	0	0	70.72	1.41	0	N
SE2485.concoct.095_sub	o__Rhizobiales (UID3447)	356	416	249	129	283	4	0	0	0	70.7	1.25	25	N
SE2473.concoct.025_sub	o__Rhizobiales (UID3447)	356	416	249	134	275	6	1	0	0	70.69	2.81	55.56	N
SE2517.metabat2_refined.020_sub	c__Deltaproteobacteria (UID3216)	83	247	155	58	176	10	3	0	0	70.66	6.31	10.53	Y
SE6864.concoct.106	o__Sphingomonadales (UID3310)	26	569	293	165	394	10	0	0	0	70.65	1.67	50	N
SE6840.metabat2_refined.027	c__Alphaproteobacteria (UID3305)	564	349	230	102	245	2	0	0	0	70.6	0.25	0	N
SE6813.concoct.113	k__Bacteria (UID2982)	88	230	148	54	176	0	0	0	0	70.58	0	0	Y
SE2540.metabat2_refined.099	k__Bacteria (UID2565)	2921	143	88	44	99	0	0	0	0	70.54	0	0	Y
SE2548.concoct.035	k__Bacteria (UID2565)	2921	143	88	49	92	2	0	0	0	70.54	0.17	0	N
SE2508.metabat_spec.005	o__Rhizobiales (UID3447)	356	416	249	109	292	15	0	0	0	70.52	2.99	60	N
SE6863.metabat2_refined.025	c__Gammaproteobacteria (UID4267)	119	544	284	140	395	9	0	0	0	70.49	1.67	55.56	N
SE2503.metabat_sens.006_sub	o__Rhizobiales (UID3447)	356	416	249	120	284	12	0	0	0	70.47	3.37	66.67	N
SE2457.metabat2_refined.051_sub	o__Rhizobiales (UID3447)	356	416	249	125	282	9	0	0	0	70.46	2.74	66.67	N
SE6867.metabat_spec.007	o__Rhizobiales (UID3447)	356	416	249	129	260	27	0	0	0	70.45	7.23	70.37	N
SE6805.semibin_refined.023_sub	c__Alphaproteobacteria (UID3305)	564	349	230	98	247	4	0	0	0	70.44	1.1	0	N
SE2553.semibin_refined.051_sub	c__Alphaproteobacteria (UID3422)	26	529	308	196	326	7	0	0	0	70.43	1.41	42.86	N
SE2550.metabat_spec.004	f__Rhodobacteraceae (UID3340)	84	568	330	171	387	10	0	0	0	70.4	0.97	40	N
SE2473.concoct.034_sub	s__algicola (UID2846)	47	571	303	176	379	16	0	0	0	70.35	2.29	25	N
SE6816.concoct.139_sub	f__Rhodobacteraceae (UID3360)	56	582	313	173	373	33	3	0	0	70.29	6.78	71.43	N
SE2464.concoct.172_sub	k__Bacteria (UID1453)	901	168	114	46	116	6	0	0	0	70.28	3.3	0	N
SE2543.concoct.207	k__Bacteria (UID3187)	2258	190	119	71	115	4	0	0	0	70.25	2.57	25	Y
SE6792.semibin_refined.038_sub	c__Gammaproteobacteria (UID4444)	263	507	232	156	346	5	0	0	0	70.2	1.03	0	N
SE2458.metabat_sens.001_sub	f__Rhodobacteraceae (UID3356)	67	616	330	201	373	42	0	0	0	70.2	6.9	40.48	N
SE2506.semibin_refined.064_sub	o__Rhizobiales (UID3447)	356	416	249	112	300	3	1	0	0	70.17	2.01	50	N
SE2543.concoct.275_sub	k__Bacteria (UID2565)	2921	143	87	53	82	8	0	0	0	70.17	9.2	12.5	Y
SE2485.metabat2_refined.112_sub	o__Rhizobiales (UID3447)	356	416	249	126	281	9	0	0	0	70.07	0.9	11.11	Y
SE6864.metabat_sens.016	o__Rhizobiales (UID3447)	356	416	249	117	284	15	0	0	0	70.06	3.96	60	N
SE2485.metabat_sens.008_sub	o__Rhizobiales (UID3447)	356	416	249	125	273	18	0	0	0	69.99	3.65	55.56	N
SE6792.metabat2_refined.076_sub	k__Bacteria (UID203)	5449	104	58	54	47	3	0	0	0	69.94	5.17	66.67	N
SE2522.metabat_spec.005_sub	s__algicola (UID2846)	47	571	303	180	374	17	0	0	0	69.92	3.31	17.65	N
SE2479.maxbin.011_sub	c__Alphaproteobacteria (UID3305)	564	349	230	111	192	45	1	0	0	69.9	14.68	6.25	N
SE2517.metabat2_refined.017_sub	k__Bacteria (UID2565)	2921	143	88	36	95	11	1	0	0	69.86	9.42	21.43	Y
SE2461.metabat_sspec.001_sub	o__Rhizobiales (UID3447)	356	416	249	120	286	10	0	0	0	69.82	2.3	20	N
SE2553.concoct.279_sub	k__Bacteria (UID2495)	2993	147	91	51	92	4	0	0	0	69.73	3.4	25	N
SE2540.maxbin.032_sub	k__Bacteria (UID1453)	901	168	114	47	112	9	0	0	0	69.72	3.56	11.11	N
SE2454.metabat2_refined.251_sub	k__Bacteria (UID1453)	901	168	114	60	105	3	0	0	0	69.6	2.63	33.33	N
SE2498.metabat2_refined.006	k__Bacteria (UID2565)	2921	142	87	37	101	4	0	0	0	69.6	3.52	25	N
SE6808.concoct.170_sub	f__Rhodobacteraceae (UID3360)	56	582	313	192	377	13	0	0	0	69.58	2.27	61.54	Y
SE6851.concoct.056_sub	c__Alphaproteobacteria (UID3305)	564	349	230	107	237	5	0	0	0	69.56	1.03	40	N
SE2461.concoct.065_sub	f__Rhodobacteraceae (UID3356)	67	617	330	201	381	34	1	0	0	69.51	7.09	37.84	N
SE6860.concoct.018_sub	f__Rhodobacteraceae (UID3360)	56	582	313	189	387	6	0	0	0	69.5	0.69	33.33	N
SE6768.concoct.032_sub	k__Bacteria (UID2569)	434	278	186	76	195	7	0	0	0	69.49	2.2	0	Y
[truncated: 6,213 more rows]

## Sheet: S5
MAG_ID	Domain	Phylum	Class	Order	Family	Genus	Species	Completeness	Contamination	Genome_size_Mbp	GC
SE2451.concoct.100	d__Bacteria	p__Proteobacteria	c__Alphaproteobacteria	o__Caulobacterales	f__Parvularculaceae	g__Aquisalinus	s__	96.48	3.53	3.58921	54.8
SE2451.maxbin.028	d__Bacteria	p__Proteobacteria	c__Alphaproteobacteria	o__Rhizobiales	f__MH13	g__MH13	s__	90.76	0.84	1.25066	51
SE2451.maxbin.031	d__Bacteria	p__Proteobacteria	c__Alphaproteobacteria	o__UBA1280	f__	g__	s__	57.53	0	3.34069	54.9
SE2451.metabat2_refined.001_sub	d__Bacteria	p__Proteobacteria	c__Alphaproteobacteria	o__Caulobacterales	f__Hyphomonadaceae	g__Henriciella	s__	94.78	0.9	3.49119	60.2
SE2451.metabat2_refined.012	d__Bacteria	p__Proteobacteria	c__Alphaproteobacteria	o__Rhizobiales	f__MH13	g__MH13	s__	97.83	2.33	3.97537	63.3
SE2451.metabat_sens.048	d__Bacteria	p__Proteobacteria	c__Alphaproteobacteria	o__Rhizobiales	f__Rhizobiaceae	g__Roseitalea	s__	99.68	0.54	4.07385	56.3
SE2454.concoct.032	d__Bacteria	p__Proteobacteria	c__Alphaproteobacteria	o__Caulobacterales	f__Hyphomonadaceae	g__UBA5336	s__	64.61	1.75	2.78709	57
SE2454.concoct.044_sub	d__Bacteria	p__Proteobacteria	c__Alphaproteobacteria	o__DSM-16000	f__Inquilinaceae	g__	s__	56.09	1.61	6.76481	67.6
SE2454.concoct.065_sub	d__Bacteria	p__Myxococcota	c__UBA9042	o__PHBI01	f__	g__	s__	66.88	1.08	3.23971	55.7
SE2454.concoct.096_sub	d__Bacteria	p__Bacteroidota	c__Bacteroidia	o__Flavobacteriales	f__	g__	s__	60.57	3.31	3.27358	64
SE2454.concoct.100_sub	d__Bacteria	p__Planctomycetota	c__Phycisphaerae	o__Phycisphaerales	f__Phycisphaeraceae	g__Algisphaera	s__	80.11	2.54	3.67025	60.7
SE2454.concoct.108_sub	d__Bacteria	p__Proteobacteria	c__Alphaproteobacteria	o__UBA8366	f__GCA-2696645	g__	s__	78.3	5.17	5.43797	63.6
SE2454.concoct.119	d__Bacteria	p__Planctomycetota	c__Planctomycetia	o__Pirellulales	f__Lacipirellulaceae	g__Botrimarina	s__	94.53	1.45	4.22497	61.2
SE2454.concoct.124	d__Bacteria	p__Proteobacteria	c__Gammaproteobacteria	o__Pseudomonadales	f__Halieaceae	g__	s__	69.06	2.91	2.70195	54
SE2454.concoct.129_sub	d__Bacteria	p__Proteobacteria	c__Alphaproteobacteria	o__Rhodobacterales	f__Rhodobacteraceae	g__Cognatishimia	s__	66.9	3.06	5.93288	70.9
SE2454.concoct.130_sub	d__Bacteria	p__Planctomycetota	c__UBA1135	o__UBA1135	f__GCA-002686595	g__GCA-2862085	s__	72.5	3.04	2.82881	59.1
SE2454.concoct.152_sub	d__Bacteria	p__Proteobacteria	c__Alphaproteobacteria	o__Parvibaculales	f__CGMCC-115125	g__Pyruvatibacter	s__	85.03	1.14	1.25543	39.4
SE2454.concoct.169	d__Bacteria	p__Proteobacteria	c__Alphaproteobacteria	o__	f__	g__	s__	75.16	2.36	1.32945	39.1
SE2454.concoct.181_sub	d__Bacteria	p__Chlamydiota	c__Chlamydiia	o__Chlamydiales	f__JAAZZY01	g__	s__	83.21	4.7	6.55485	46.2
SE2454.concoct.201_sub	d__Bacteria	p__Planctomycetota	c__Planctomycetia	o__Pirellulales	f__Pirellulaceae	g__Mariniblastus	s__	65	0	2.37039	45.3
SE2454.concoct.207	d__Bacteria	p__Bacteroidota	c__Rhodothermia	o__Balneolales	f__Balneolaceae	g__	s__	62.48	2.23	4.03271	61.6
SE2454.concoct.214_sub	d__Bacteria	p__Proteobacteria	c__Gammaproteobacteria	o__Pseudomonadales	f__Halieaceae	g__Congregibacter	s__	94.1	1.41	3.12681	43.1
SE2454.concoct.236_sub	d__Bacteria	p__Proteobacteria	c__Alphaproteobacteria	o__Rhizobiales	f__HXMU1428-3	g__HXMU1428-3	s__	63.46	2.69	1.19548	49
SE2454.concoct.243_sub	d__Bacteria	p__Proteobacteria	c__Alphaproteobacteria	o__Rickettsiales	f__UBA3002	g__	s__	57.93	0.65	2.94774	40.3
SE2454.concoct.289_sub	d__Bacteria	p__Bacteroidota	c__Bacteroidia	o__Cytophagales	f__Cyclobacteriaceae	g__	s__	68.08	2.3	4.19875	66.9
SE2454.maxbin.030_sub	d__Bacteria	p__Planctomycetota	c__Planctomycetia	o__Pirellulales	f__Lacipirellulaceae	g__Botrimarina	s__	94.2	2.09	2.67006	38.7
SE2454.maxbin.049	d__Bacteria	p__Proteobacteria	c__Gammaproteobacteria	o__UBA4575	f__UBA4575	g__JABDMD01	s__	77.96	1.2	4.57622	32.8
SE2454.maxbin.099_sub	d__Bacteria	p__Bacteroidota	c__Bacteroidia	o__Flavobacteriales	f__Flavobacteriaceae	g__Aquimarina	s__	83.88	5.78	4.57726	63.4
SE2454.maxbin.115	d__Bacteria	p__Proteobacteria	c__Alphaproteobacteria	o__Rhizobiales	f__Amorphaceae	g__Acuticoccus	s__	55.36	1.69	1.98772	48.2
SE2454.maxbin.140	d__Bacteria	p__Bacteroidota	c__Bacteroidia	o__Flavobacteriales	f__Flavobacteriaceae	g__DT-32	s__	90.11	6.55	3.85403	61.4
SE2454.maxbin.142	d__Bacteria	p__Proteobacteria	c__Alphaproteobacteria	o__Rhizobiales	f__Rhizobiaceae	g__Roseitalea	s__	66.33	0.93	1.05412	46.5
SE2454.maxbin.176	d__Bacteria	p__Patescibacteria	c__Gracilibacteria	o__Peribacterales	f__Peribacteraceae	g__UBA2170	s__	99.21	1.19	4.44295	44.9
SE2454.metabat2_refined.036	d__Bacteria	p__Proteobacteria	c__Gammaproteobacteria	o__Enterobacterales	f__Alteromonadaceae	g__Aliiglaciecola	s__	93.21	0.28	3.33017	44.3
SE2454.metabat2_refined.047_sub	d__Bacteria	p__Bdellovibrionota_C	c__UBA2361	o__UBA2361	f__RFPC01	g__	s__	100	0.54	4.77453	35.4
SE2454.metabat2_refined.100	d__Bacteria	p__Bacteroidota	c__Bacteroidia	o__Flavobacteriales	f__Salibacteraceae	g__GCA-2705995	s__	95.45	0.57	3.5036	59.8
SE2454.metabat2_refined.113	d__Bacteria	p__Planctomycetota	c__Phycisphaerae	o__Phycisphaerales	f__Phycisphaeraceae	g__	s__	97.29	2.2	4.33631	58.2
SE2454.metabat2_refined.136	d__Bacteria	p__Proteobacteria	c__Gammaproteobacteria	o__Pseudomonadales	f__Halieaceae	g__Congregibacter	s__Congregibacter sp002428935	87.53	1.52	4.44477	38.3
SE2454.metabat2_refined.161_sub	d__Bacteria	p__Bacteroidota	c__Bacteroidia	o__Flavobacteriales	f__Flavobacteriaceae	g__Winogradskyella	s__	62.95	2.59	4.89312	48.8
SE2454.metabat2_refined.167_sub	d__Bacteria	p__Planctomycetota	c__Planctomycetia	o__Pirellulales	f__Pirellulaceae	g__	s__	79.82	7.8	2.51228	59.5
SE2454.metabat2_refined.197	d__Bacteria	p__Proteobacteria	c__Alphaproteobacteria	o__Sphingomonadales	f__Sphingomonadaceae	g__Parasphingopyxis	s__	80.29	0.87	1.64442	35.3
SE2454.metabat2_refined.209	d__Bacteria	p__Proteobacteria	c__Gammaproteobacteria	o__UBA6186	f__UBA6186	g__	s__	64.98	1.37	2.75471	49.6
SE2454.metabat2_refined.246_sub	d__Bacteria	p__Bdellovibrionota	c__Bdellovibrionia	o__Bdellovibrionales	f__	g__	s__	79.15	8.25	6.39029	66.1
SE2454.metabat2_refined.364_sub	d__Bacteria	p__Planctomycetota	c__Planctomycetia	o__Planctomycetales	f__Planctomycetaceae	g__	s__	96.88	1.88	4.24264	61
SE2454.metabat_spec.012	d__Bacteria	p__Proteobacteria	c__Alphaproteobacteria	o__Rhodobacterales	f__Rhodobacteraceae	g__HKCCE3408	s__	58.29	2.22	2.81743	64.1
SE2454.metabat_spec.018_sub	d__Bacteria	p__Proteobacteria	c__Alphaproteobacteria	o__Rhodobacterales	f__Rhodobacteraceae	g__Mangrovicoccus	s__	80.57	1.3	2.01499	41.2
SE2454.metabat_sspec.050	d__Bacteria	p__Proteobacteria	c__Alphaproteobacteria	o__Micavibrionales	f__Micavibrionaceae	g__	s__	75.21	7.62	4.15817	61.4
SE2454.rosella_refine.246_0	d__Bacteria	p__Proteobacteria	c__Alphaproteobacteria	o__UBA8366	f__GCA-2696645	g__Hwanghaeella	s__	98.65	0	3.54472	49.2
SE2454.rosella_refined.047	d__Bacteria	p__Verrucomicrobiota	c__Verrucomicrobiae	o__Opitutales	f__JABSRG01	g__JABSRG01	s__	97.11	0.57	3.14974	68.1
SE2454.rosella_refined.053	d__Bacteria	p__Planctomycetota	c__Phycisphaerae	o__Phycisphaerales	f__UBA1924	g__	s__	89.18	1.14	3.97479	56.7
SE2454.rosella_refined.054	d__Bacteria	p__Proteobacteria	c__Gammaproteobacteria	o__Woeseiales	f__	g__	s__	61.65	2.12	3.71056	63.2
SE2454.rosella_refined.112_sub	d__Bacteria	p__Proteobacteria	c__Alphaproteobacteria	o__Rhodobacterales	f__Rhodobacteraceae	g__Mangrovicoccus	s__	89.78	2.13	5.04258	39.9
SE2454.rosella_refined.124_sub	d__Bacteria	p__Bacteroidota	c__Bacteroidia	o__Cytophagales	f__Cyclobacteriaceae	g__Fulvivirga	s__	75.18	2.25	0.914104	42.1
SE2454.rosella_refined.219	d__Bacteria	p__Patescibacteria	c__ABY1	o__Magasanikbacterales	f__UBA922	g__	s__	85.15	1.26	3.62091	37.8
SE2454.semibin_refined.011_sub	d__Bacteria	p__Bacteroidota	c__Bacteroidia	o__Flavobacteriales	f__Flavobacteriaceae	g__Croceitalea	s__	86.17	1.43	3.20446	59.1
SE2454.semibin_refined.018_sub	d__Bacteria	p__Proteobacteria	c__Alphaproteobacteria	o__Sphingomonadales	f__Sphingomonadaceae	g__Erythrobacter	s__	88.69	0.87	3.72133	58.8
SE2454.semibin_refined.022	d__Bacteria	p__Proteobacteria	c__Alphaproteobacteria	o__Rhizobiales	f__Aestuariivirgaceae	g__Anderseniella	s__	82.99	0.58	4.33106	56.8
SE2454.semibin_refined.031_sub	d__Bacteria	p__Proteobacteria	c__Alphaproteobacteria	o__Rhizobiales	f__Im1	g__CAJQND01	s__	88.57	1.84	2.78708	45.5
SE2454.semibin_refined.035	d__Bacteria	p__Bdellovibrionota	c__Bdellovibrionia	o__Bdellovibrionales	f__Bdellovibrionaceae	g__	s__	67.99	3.76	3.68511	56.5
SE2454.semibin_refined.055_sub	d__Bacteria	p__Proteobacteria	c__Alphaproteobacteria	o__Rhizobiales	f__Hyphomicrobiaceae	g__GCA-2689605	s__	50.33	0.57	2.84328	69.2
SE2454.semibin_refined.058	d__Bacteria	p__Planctomycetota	c__Planctomycetia	o__Pirellulales	f__Lacipirellulaceae	g__	s__	82.69	1.15	3.7944	49.6
SE2454.semibin_refined.059	d__Bacteria	p__Planctomycetota	c__Planctomycetia	o__Pirellulales	f__Lacipirellulaceae	g__Bythopirellula	s__	52.96	1.72	3.05458	59.9
SE2454.semibin_refined.070_sub	d__Bacteria	p__Proteobacteria	c__Alphaproteobacteria	o__Rhodobacterales	f__Rhodobacteraceae	g__Roseovarius	s__	71.23	1.11	4.40406	51
SE2454.semibin_refined.076	d__Bacteria	p__Planctomycetota	c__Planctomycetia	o__Planctomycetales	f__Planctomycetaceae	g__	s__	65.83	1.31	3.32897	62.7
SE2454.semibin_refined.077	d__Bacteria	p__Proteobacteria	c__Alphaproteobacteria	o__Rhodobacterales	f__Rhodobacteraceae	g__Rhodobacter_B	s__	71.29	1.98	1.32113	45.2
SE2454.semibin_refined.088	d__Bacteria	p__Patescibacteria	c__Paceibacteria	o__Moranbacterales	f__GCA-2747515	g__	s__	62.9	0.73	1.94009	54.1
SE2454.semibin_refined.089	d__Bacteria	p__Proteobacteria	c__Alphaproteobacteria	o__Caulobacterales	f__Hyphomonadaceae	g__Henriciella	s__	56.22	0.48	1.25668	46.8
SE2454.semibin_refined.108	d__Bacteria	p__Proteobacteria	c__Alphaproteobacteria	o__Micavibrionales	f__Micavibrionaceae	g__TMED27	s__	59.97	0	2.32172	52.6
SE2454.semibin_refined.112	d__Bacteria	p__Bacteroidota	c__Bacteroidia	o__Flavobacteriales	f__Salibacteraceae	g__UBA6049	s__	65.54	1.04	1.66416	37.7
SE2454.semibin_refined.123	d__Bacteria	p__Chlamydiota	c__Chlamydiia	o__Chlamydiales	f__Simkaniaceae	g__	s__	91.35	1.19	4.61399	58
SE2454.semibin_refined.125	d__Bacteria	p__Proteobacteria	c__Alphaproteobacteria	o__Rhodobacterales	f__Rhodobacteraceae	g__Ruegeria	s__	60.44	1.26	2.05762	46.9
SE2454.semibin_refined.128	d__Bacteria	p__Proteobacteria	c__Gammaproteobacteria	o__Pseudomonadales	f__Oleiphilaceae	g__PZPK01	s__	98.7	1.81	3.79969	53.4
SE2454.semibin_refined.149	d__Bacteria	p__Proteobacteria	c__Alphaproteobacteria	o__Caulobacterales	f__Hyphomonadaceae	g__Henriciella	s__	94.5	1.88	4.65737	58.2
SE2454.semibin_refined.226	d__Bacteria	p__Proteobacteria	c__Alphaproteobacteria	o__Rhodobacterales	f__Rhodobacteraceae	g__Roseovarius	s__	94.83	0.69	3.74359	42.4
SE2454.semibin_refined.241	d__Bacteria	p__Bacteroidota	c__Bacteroidia	o__Flavobacteriales	f__Flavobacteriaceae	g__Croceivirga	s__	89.14	4.08	4.98547	68.2
SE2454.semibin_refined.260	d__Bacteria	p__Planctomycetota	c__PLA2	o__PLA2	f__JAEUHO01	g__	s__	92.27	1.74	3.20302	51.8
SE2454.semibin_refined.268	d__Bacteria	p__Proteobacteria	c__Alphaproteobacteria	o__Rhizobiales	f__Rhizobiaceae	g__JAALLB01	s__	96.67	1.75	3.73817	37.9
SE2454.semibin_refined.272	d__Bacteria	p__Bacteroidota	c__Bacteroidia	o__Flavobacteriales	f__Vicingaceae	g__	s__	52.74	3.45	3.50793	63.2
SE2454.semibin_refined.275_sub	d__Bacteria	p__Proteobacteria	c__Alphaproteobacteria	o__Rhodobacterales	f__Rhodobacteraceae	g__Roseobacter	s__	84.09	3.56	4.61374	58.4
SE2454.semibin_refined.280	d__Bacteria	p__Proteobacteria	c__Gammaproteobacteria	o__Pseudomonadales	f__HTCC2089	g__	s__	90.27	1.28	2.44361	47.3
SE2454.semibin_refined.296_sub	d__Bacteria	p__Proteobacteria	c__Gammaproteobacteria	o__Pseudomonadales	f__GM7GCV1	g__GM7GCV1	s__	51.88	2.13	2.23478	55.4
SE2454.semibin_refined.298_sub	d__Bacteria	p__Proteobacteria	c__Alphaproteobacteria	o__Rhodobacterales	f__Rhodobacteraceae	g__Roseobacter	s__	87.79	0.78	1.62352	40.2
SE2454.semibin_refined.303	d__Bacteria	p__Proteobacteria	c__Gammaproteobacteria	o__UBA6186	f__UBA6186	g__	s__	90.71	0	2.15533	45.6
SE2454.semibin_refined.306	d__Bacteria	p__Proteobacteria	c__Gammaproteobacteria	o__Berkiellales	f__Berkiellaceae	g__	s__	94.49	1.73	4.06861	46.4
SE2454.semibin_refined.315	d__Bacteria	p__Bdellovibrionota_C	c__UBA2361	o__UBA2361	f__RFPC01	g__RFPC01	s__	99.71	1.44	4.29214	60.2
SE2454.semibin_refined.322	d__Bacteria	p__Proteobacteria	c__Alphaproteobacteria	o__Rhodobacterales	f__Rhodobacteraceae	g__Shimia	s__	94.73	2.47	3.0236	40.8
SE2454.semibin_refined.326	d__Bacteria	p__Proteobacteria	c__Gammaproteobacteria	o__DSM-16500	f__DSM-16500	g__	s__	97.29	1.3	4.09914	55.7
SE2454.semibin_refined.334	d__Bacteria	p__Proteobacteria	c__Alphaproteobacteria	o__Caulobacterales	f__Hyphomonadaceae	g__Henriciella	s__	95.73	5.7	5.99547	42
SE2454.vamb.046	d__Bacteria	p__Cyanobacteria	c__Vampirovibrionia	o__Obscuribacterales	f__Obscuribacteraceae	g__RI-106	s__	50.18	2.99	4.99749	58.4
SE2454.vamb.047_sub	d__Bacteria	p__Acidobacteriota	c__Thermoanaerobaculia	o__UBA5704	f__UBA5704	g__	s__	99.14	4.31	2.55853	41.5
SE2454.vamb.069	d__Bacteria	p__Proteobacteria	c__Gammaproteobacteria	o__Pseudomonadales	f__Cellvibrionaceae	g__	s__	98.27	2.01	4.78986	52.5
SE2454.vamb.072	d__Bacteria	p__Proteobacteria	c__Alphaproteobacteria	o__Rhizobiales	f__Methyloligellaceae	g__MnTg02	s__	95.75	0.65	1.73662	45.3
SE2454.vamb.099	d__Bacteria	p__Proteobacteria	c__Alphaproteobacteria	o__Micavibrionales	f__Micavibrionaceae	g__GCA-2708415	s__	86.39	5.96	5.24813	56.1
SE2454.vamb.104_sub	d__Bacteria	p__Verrucomicrobiota	c__Verrucomicrobiae	o__Verrucomicrobiales	f__DEV007	g__Arctic95D-9	s__	77.29	0	0.741855	32.1
SE2454.vamb.186	d__Bacteria	p__Proteobacteria	c__Alphaproteobacteria	o__Rickettsiales	f__1604HC	g__	s__	53.53	3.45	1.88553	57.4
SE2457.concoct.012_sub	d__Bacteria	p__Proteobacteria	c__Alphaproteobacteria	o__Rhizobiales	f__MH13	g__MH13	s__	67.9	1.74	2.76448	60.7
SE2457.metabat2_refined.064_sub	d__Bacteria	p__Proteobacteria	c__Alphaproteobacteria	o__Rhodobacterales	f__Rhodobacteraceae	g__Dinoroseobacter	s__	95.22	0.94	2.19325	45
SE2457.metabat_sens.020	d__Bacteria	p__Proteobacteria	c__Alphaproteobacteria	o__Micavibrionales	f__Micavibrionaceae	g__TMED27	s__	97.73	2.02	4.50875	62.8
SE2457.metabat_sens.046_sub	d__Bacteria	p__Proteobacteria	c__Alphaproteobacteria	o__Rhodobacterales	f__Rhodobacteraceae	g__IMCC34051	s__	80.19	1.51	1.71287	52.6
SE2458.concoct.032	d__Bacteria	p__Proteobacteria	c__Alphaproteobacteria	o__Micavibrionales	f__Micavibrionaceae	g__	s__	89.9	3.34	2.3285	38.3
SE2460.concoct.126	d__Bacteria	p__Proteobacteria	c__Gammaproteobacteria	o__UBA4575	f__UBA4575	g__JABDMD01	s__	63.1	2.44	2.2535	55.2
SE2460.concoct.156	d__Bacteria	p__Proteobacteria	c__Alphaproteobacteria	o__Rhodospirillales	f__Casp-alpha2	g__UBA4479	s__	52.73	1.12	0.937863	47.5
SE2460.concoct.173_sub	d__Bacteria	p__Patescibacteria	c__Paceibacteria	o__UBA9983_A	f__UBA918	g__OLB19	s__	50.14	3.62	1.95835	35.6
SE2460.maxbin.077_sub	d__Bacteria	p__Proteobacteria	c__Gammaproteobacteria	o__UBA6186	f__UBA6186	g__	s__	96.69	6.35	4.88938	44.4
SE2460.maxbin.078_sub	d__Bacteria	p__Proteobacteria	c__Gammaproteobacteria	o__Enterobacterales	f__Alteromonadaceae	g__	s__	59.64	1.37	1.01404	39.7
SE2460.metabat2_refined.013	d__Bacteria	p__Bacteroidota	c__Bacteroidia	o__Cytophagales	f__	g__	s__	85.78	6.96	3.52288	62.2
SE2460.metabat2_refined.027_sub	d__Bacteria	p__Proteobacteria	c__Alphaproteobacteria	o__Rhodobacterales	f__Rhodobacteraceae	g__Roseicyclus	s__	98.6	0	3.82501	55.1
SE2460.rosella_refined.080	d__Bacteria	p__Proteobacteria	c__Alphaproteobacteria	o__Rhizobiales	f__Rhizobiaceae	g__Roseitalea	s__	96.88	0.22	2.00248	46.8
SE2460.rosella_refined.092	d__Bacteria	p__Proteobacteria	c__Alphaproteobacteria	o__Rhizobiales	f__OSC116	g__	s__	99.44	0	3.95634	39.3
SE2460.semibin_refined.005	d__Bacteria	p__Bacteroidota	c__Rhodothermia	o__Balneolales	f__Balneolaceae	g__HXMU1420-13	s__	52.59	1.72	2.26111	62.3
SE2460.semibin_refined.063_sub	d__Bacteria	p__Proteobacteria	c__Alphaproteobacteria	o__Rhodobacterales	f__Rhodobacteraceae	g__Dinoroseobacter	s__	96.4	1.24	4.05131	61.2
SE2460.vamb.024	d__Bacteria	p__Proteobacteria	c__Alphaproteobacteria	o__Rhizobiales	f__Rhizobiaceae	g__Roseitalea	s__	51.5	2.26	2.09993	63.5
SE2461.maxbin.004_sub	d__Bacteria	p__Proteobacteria	c__Alphaproteobacteria	o__Rhodobacterales	f__Rhodobacteraceae	g__IMCC34051	s__	98.69	0.99	3.12076	54.8
SE2464.concoct.043	d__Bacteria	p__Proteobacteria	c__Alphaproteobacteria	o__Caulobacterales	f__Hyphomonadaceae	g__Henriciella	s__	57.91	3.24	3.17292	66.8
SE2464.concoct.091	d__Bacteria	p__Proteobacteria	c__Alphaproteobacteria	o__Kiloniellales	f__J153	g__	s__	79.26	0	3.99575	56.3
SE2464.concoct.137_sub	d__Bacteria	p__Planctomycetota	c__Planctomycetia	o__Pirellulales	f__Lacipirellulaceae	g__	s__	79.15	2.51	3.08433	61.4
SE2464.concoct.145	d__Bacteria	p__Proteobacteria	c__Alphaproteobacteria	o__Caulobacterales	f__Hyphomonadaceae	g__UBA5336	s__	85.33	2.4	7.19206	36.4
SE2464.concoct.146	d__Bacteria	p__Cyanobacteria	c__Cyanobacteriia	o__Cyanobacteriales	f__Microcoleaceae	g__Okeania	s__	73.23	0.11	4.37888	51
SE2464.concoct.169_sub	d__Bacteria	p__Planctomycetota	c__Planctomycetia	o__Pirellulales	f__Pirellulaceae	g__Mariniblastus	s__	74.07	2.54	3.09349	60.2
SE2464.concoct.185	d__Bacteria	p__Proteobacteria	c__Alphaproteobacteria	o__Rhizobiales	f__Methyloligellaceae	g__UBA2767	s__	100	1.81	4.32857	42.4
SE2464.maxbin.033	d__Bacteria	p__Proteobacteria	c__Gammaproteobacteria	o__Pseudomonadales	f__Cellvibrionaceae	g__	s__	62.39	0	6.03323	53.7
SE2464.metabat2_refined.064	d__Bacteria	p__Planctomycetota	c__Planctomycetia	o__Pirellulales	f__Pirellulaceae	g__Stieleria	s__	99.01	0.99	3.63631	35.7
SE2464.metabat2_refined.074	d__Bacteria	p__Bacteroidota	c__Bacteroidia	o__Flavobacteriales	f__Flavobacteriaceae	g__Winogradskyella	s__	52.42	0	0.805957	39
SE2464.rosella_refined.073	d__Bacteria	p__Bacteroidota	c__Bacteroidia	o__Cytophagales	f__Amoebophilaceae	g__	s__	50.01	1.98	1.89464	60
SE2468.concoct.038_sub	d__Bacteria	p__Proteobacteria	c__Alphaproteobacteria	o__Rhizobiales	f__Methyloligellaceae	g__UBA2767	s__	94.91	2.11	2.8783	58.7
SE2473.concoct.013_sub	d__Bacteria	p__Proteobacteria	c__Alphaproteobacteria	o__Caulobacterales	f__Maricaulaceae	g__Oceanicaulis	s__	97.79	0.2	3.2341	57.7
SE2473.concoct.052	d__Bacteria	p__Proteobacteria	c__Alphaproteobacteria	o__Rhizobiales	f__MH13	g__MH13	s__	65.66	0	3.77905	57.3
SE2473.concoct.053_sub	d__Bacteria	p__Proteobacteria	c__Alphaproteobacteria	o__Rhodobacterales	f__Rhodobacteraceae	g__Ruegeria	s__	59.84	6.16	3.5774	48
SE2473.concoct.070	d__Bacteria	p__Proteobacteria	c__Alphaproteobacteria	o__Rhizobiales	f__Rhizobiaceae	g__JAALLB01	s__	71.18	2.25	0.902667	39.1
SE2473.concoct.079	d__Bacteria	p__Patescibacteria	c__ABY1	o__SG8-24	f__UBA9934	g__	s__	80.71	0.72	8.54991	53.7
SE2473.concoct.154_sub	d__Bacteria	p__Planctomycetota	c__Planctomycetia	o__Planctomycetales	f__Planctomycetaceae	g__Fuerstia	s__	54.17	1.2	4.38097	36.9
SE2473.concoct.155	d__Bacteria	p__Cyanobacteria	c__Cyanobacteriia	o__Cyanobacteriales	f__Microcoleaceae	g__Okeania	s__	96.72	2.49	4.18463	55.4
SE2473.maxbin.015_sub	d__Bacteria	p__Proteobacteria	c__Alphaproteobacteria	o__Caulobacterales	f__Hyphomonadaceae	g__Henriciella	s__	85.49	1.18	3.27887	64
SE2473.metabat2_refined.063	d__Bacteria	p__Proteobacteria	c__Alphaproteobacteria	o__Rhizobiales	f__Rhizobiaceae	g__Roseitalea	s__	82.91	0.83	2.71048	54.8
SE2473.rosella_refined.002	d__Bacteria	p__Proteobacteria	c__Alphaproteobacteria	o__Caulobacterales	f__Hyphomonadaceae	g__Henriciella	s__	94.77	1.74	2.10963	42.2
SE2473.rosella_refined.023	d__Bacteria	p__Proteobacteria	c__Gammaproteobacteria	o__UBA12402	f__UBA12402	g__	s__	99.08	3.09	5.5632	45.9
SE2473.semibin_refined.066	d__Bacteria	p__Proteobacteria	c__Gammaproteobacteria	o__Pseudomonadales	f__Cellvibrionaceae	g__Agarilytica	s__	93.91	1.92	4.25955	59
SE2473.semibin_refined.078	d__Bacteria	p__Proteobacteria	c__Alphaproteobacteria	o__Rhodobacterales	f__Rhodobacteraceae	g__Tateyamaria	s__	87.86	0.91	2.86295	56.9
SE2473.semibin_refined.109_sub	d__Bacteria	p__Proteobacteria	c__Alphaproteobacteria	o__Sphingomonadales	f__Sphingomonadaceae	g__Erythrobacter	s__	89.78	4.55	3.93479	60.5
SE2473.semibin_refined.128	d__Bacteria	p__Planctomycetota	c__Phycisphaerae	o__Phycisphaerales	f__Phycisphaeraceae	g__	s__	78.76	1.13	2.57168	56.2
SE2473.semibin_refined.155	d__Bacteria	p__Proteobacteria	c__Alphaproteobacteria	o__Caulobacterales	f__Parvularculaceae	g__Parvularcula	s__	98.19	0.28	4.65949	61
SE2473.semibin_refined.156	d__Bacteria	p__Proteobacteria	c__Alphaproteobacteria	o__Rhodobacterales	f__Rhodobacteraceae	g__Roseobacter	s__	96.15	1.38	2.9967	55.3
SE2473.semibin_refined.164	d__Bacteria	p__Proteobacteria	c__Alphaproteobacteria	o__Caulobacterales	f__Maricaulaceae	g__Oceanicaulis	s__	98.75	3.53	10.2751	59.8
SE2473.vamb.013	d__Bacteria	p__Planctomycetota	c__Planctomycetia	o__Pirellulales	f__Pirellulaceae	g__Stieleria	s__	99.32	0	3.38096	49.8
SE2473.vamb.038	d__Bacteria	p__Verrucomicrobiota	c__Verrucomicrobiae	o__Opitutales	f__JABSRG01	g__JABSRG01	s__	97.66	0.01	3.55097	60.7
SE2473.vamb.043	d__Bacteria	p__Proteobacteria	c__Alphaproteobacteria	o__Sphingomonadales	f__Sphingomonadaceae	g__Erythrobacter	s__	76.39	0.55	0.848477	43.3
SE2478.vamb.011	d__Bacteria	p__Bacteroidota	c__Bacteroidia	o__Cytophagales	f__Amoebophilaceae	g__	s__	99.78	0.22	2.05426	47.4
SE2479.concoct.053	d__Bacteria	p__Proteobacteria	c__Alphaproteobacteria	o__Rhizobiales	f__OSC116	g__	s__	62.45	1.09	2.56641	60.3
SE2485.concoct.019	d__Bacteria	p__Proteobacteria	c__Gammaproteobacteria	o__Xanthomonadales	f__	g__	s__	75.38	3.31	4.86398	65.7
SE2485.concoct.037	d__Bacteria	p__Proteobacteria	c__Gammaproteobacteria	o__SZUA-146	f__SZUA-146	g__	s__	59.53	2.58	2.35233	59.3
SE2485.concoct.075	d__Bacteria	p__Proteobacteria	c__Gammaproteobacteria	o__Woeseiales	f__Woeseiaceae	g__UBA1847	s__	96.12	1.31	3.38024	56.2
SE2485.concoct.102	d__Bacteria	p__Proteobacteria	c__Alphaproteobacteria	o__Rhizobiales	f__Methyloligellaceae	g__	s__	54.43	9.39	2.77061	67.8
SE2485.concoct.109_sub	d__Bacteria	p__Planctomycetota	c__Phycisphaerae	o__Phycisphaerales	f__UBA1924	g__	s__	86.01	2.02	3.30745	46.3
SE2485.concoct.116	d__Bacteria	p__Proteobacteria	c__Alphaproteobacteria	o__Rhizobiales	f__Rhizobiaceae	g__Lentilitoribacter	s__	51.65	8.62	4.4885	55.6
SE2485.concoct.117_sub	d__Bacteria	p__Proteobacteria	c__Alphaproteobacteria	o__Rhodobacterales	f__Rhodobacteraceae	g__Ruegeria	s__	97.01	1.35	4.53798	61.3
SE2485.concoct.120	d__Bacteria	p__Proteobacteria	c__Alphaproteobacteria	o__Rhodobacterales	f__Rhodobacteraceae	g__JABDJO01	s__	72.02	8.54	4.07308	58.8
SE2485.concoct.128_sub	d__Bacteria	p__Proteobacteria	c__Alphaproteobacteria	o__Rhodobacterales	f__Rhodobacteraceae	g__JABSSC01	s__	92.54	3.44	3.78666	33.8
SE2485.concoct.131_sub	d__Bacteria	p__Bacteroidota	c__Bacteroidia	o__Flavobacteriales	f__Flavobacteriaceae	g__Winogradskyella	s__	72.06	0.1	3.41939	70.3
SE2485.concoct.140	d__Bacteria	p__Planctomycetota	c__PLA2	o__PLA2	f__JAEUHO01	g__	s__	92.29	1.96	1.85547	47.1
SE2485.concoct.144	d__Bacteria	p__Proteobacteria	c__Alphaproteobacteria	o__Rhizobiales	f__OSC116	g__	s__	89.99	1.17	3.45688	55.1
SE2485.concoct.162	d__Bacteria	p__Proteobacteria	c__Gammaproteobacteria	o__Woeseiales	f__Woeseiaceae	g__JAACFE01	s__	86.48	2.93	4.61189	54.1
SE2485.concoct.173_sub	d__Bacteria	p__Proteobacteria	c__Alphaproteobacteria	o__Rhodobacterales	f__Rhodobacteraceae	g__Rhodobacter_B	s__	76.39	4.49	4.58862	61.6
SE2485.concoct.194	d__Bacteria	p__Proteobacteria	c__Alphaproteobacteria	o__Rhizobiales	f__	g__	s__	98.75	2.35	7.62875	50.1
SE2485.maxbin.012	d__Bacteria	p__Planctomycetota	c__Planctomycetia	o__Pirellulales	f__Pirellulaceae	g__Mariniblastus	s__	80.45	9.47	2.8161	59.9
SE2485.maxbin.050_sub	d__Bacteria	p__Proteobacteria	c__Alphaproteobacteria	o__Sphingomonadales	f__Sphingomonadaceae	g__Erythrobacter	s__	79.85	2.33	3.3479	41.9
SE2485.maxbin.065_sub	d__Bacteria	p__Bacteroidota	c__Bacteroidia	o__Flavobacteriales	f__Flavobacteriaceae	g__Croceivirga	s__	88.23	6.1	3.68921	58.6
SE2485.metabat2_refined.011_sub	d__Bacteria	p__Proteobacteria	c__Alphaproteobacteria	o__Rhodobacterales	f__Rhodobacteraceae	g__Thalassobius	s__	75.72	4.48	2.14613	38.2
SE2485.metabat2_refined.030_sub	d__Bacteria	p__Proteobacteria	c__Gammaproteobacteria	o__UBA4575	f__UBA4575	g__JABDMD01	s__	70.07	0.9	2.44652	56.2
SE2485.metabat2_refined.112_sub	d__Bacteria	p__Proteobacteria	c__Alphaproteobacteria	o__Rhizobiales	f__MH13	g__MH13	s__	95.63	0.85	3.51206	69.1
SE2485.metabat2_refined.127	d__Bacteria	p__Actinobacteriota	c__Acidimicrobiia	o__Acidimicrobiales	f__TK06	g__JAADHX01	s__	98.56	3.01	3.57343	42.5
SE2485.metabat2_refined.156_sub	d__Bacteria	p__Bacteroidota	c__Bacteroidia	o__Flavobacteriales	f__Flavobacteriaceae	g__Muricauda	s__	99.32	1.24	3.81359	40.1
SE2485.metabat_spec.003	d__Bacteria	p__Bacteroidota	c__Bacteroidia	o__Flavobacteriales	f__Flavobacteriaceae	g__Muricauda	s__	60.03	7.32	2.89084	61.3
SE2485.rosella_refine.7_0	d__Bacteria	p__Proteobacteria	c__Alphaproteobacteria	o__Rhodobacterales	f__Rhodobacteraceae	g__HKCCE3408	s__	63.5	2.75	1.30639	40.6
SE2485.semibin_refined.004	d__Bacteria	p__Proteobacteria	c__Alphaproteobacteria	o__Micavibrionales	f__Micavibrionaceae	g__UBA1850	s__	99.19	0.54	2.89718	62
SE2485.semibin_refined.008_sub	d__Bacteria	p__Proteobacteria	c__Alphaproteobacteria	o__Caulobacterales	f__Maricaulaceae	g__Hyphobacterium	s__	68.84	1.71	2.06544	60.8
SE2485.semibin_refined.010_sub	d__Bacteria	p__Proteobacteria	c__Alphaproteobacteria	o__Sphingomonadales	f__Sphingomonadaceae	g__Erythrobacter	s__	89.44	2.75	2.7162	41.5
SE2485.semibin_refined.078	d__Bacteria	p__Proteobacteria	c__Alphaproteobacteria	o__Micavibrionales	f__Micavibrionaceae	g__	s__	98	0.03	4.12586	45.1
SE2485.semibin_refined.088_sub	d__Bacteria	p__Proteobacteria	c__Gammaproteobacteria	o__Arenicellales	f__Arenicellaceae	g__Arenicella	s__	97.29	0.1	1.79257	41.5
SE2485.semibin_refined.093_sub	d__Bacteria	p__Proteobacteria	c__Alphaproteobacteria	o__Bin98	f__	g__	s__	56.65	2.83	5.53499	47.9
SE2490.concoct.103_sub	d__Bacteria	p__Chloroflexota	c__Anaerolineae	o__Promineofilales	f__Promineofilaceae	g__WTJY01	s__	98.2	1.95	3.08152	62.1
SE2490.maxbin.044	d__Bacteria	p__Proteobacteria	c__Alphaproteobacteria	o__Sphingomonadales	f__Sphingomonadaceae	g__Parasphingopyxis	s__	52.15	0.16	2.28533	60.9
SE2490.metabat2_refined.034_sub	d__Bacteria	p__Proteobacteria	c__Alphaproteobacteria	o__Rhodobacterales	f__Rhodobacteraceae	g__Tateyamaria	s__	98.42	1.9	6.40572	35.8
SE2490.metabat2_refined.036	d__Bacteria	p__Bacteroidota	c__Bacteroidia	o__Flavobacteriales	f__Flavobacteriaceae	g__Kordia	s__	95.93	0.58	1.99028	43.8
SE2490.rosella_refined.052	d__Bacteria	p__Proteobacteria	c__Gammaproteobacteria	o__JABCZS01	f__JABCZS01	g__	s__	95.67	3.1	7.39668	62.3
SE2490.rosella_refined.063	d__Bacteria	p__Acidobacteriota	c__Thermoanaerobaculia	o__UBA5704	f__UBA5704	g__	s__	55.49	0	2.8421	56.5
SE2490.semibin_refined.059_sub	d__Bacteria	p__Proteobacteria	c__Alphaproteobacteria	o__Rhodobacterales	f__Rhodobacteraceae	g__Yoonia	s__	58.54	0.18	0.850641	36.8
SE2490.vamb.031	d__Bacteria	p__Bacteroidota	c__Bacteroidia	o__Cytophagales	f__	g__	s__	98.35	0	3.44379	53.4
SE2496.rosella_refined.004	d__Bacteria	p__Proteobacteria	c__Alphaproteobacteria	o__Caulobacterales	f__Hyphomonadaceae	g__Henriciella	s__	95.83	1.33	3.68881	60
SE2498.concoct.028	d__Bacteria	p__Proteobacteria	c__Alphaproteobacteria	o__Rhodobacterales	f__Rhodobacteraceae	g__JABSSC01	s__	51.21	0.85	0.777232	46.8
SE2498.concoct.040_sub	d__Bacteria	p__Patescibacteria	c__Paceibacteria	o__UBA9983_A	f__UBA918	g__OLB19	s__	99.35	0	3.38021	53.7
SE2498.concoct.042	d__Bacteria	p__Proteobacteria	c__Alphaproteobacteria	o__Sphingomonadales	f__	g__	s__	92.78	1.63	4.57369	59.3
SE2498.concoct.091	d__Bacteria	p__Proteobacteria	c__Alphaproteobacteria	o__Rhizobiales	f__Aestuariivirgaceae	g__Anderseniella	s__	89.04	2.62	3.45955	61.6
SE2498.metabat2_refined.032	d__Bacteria	p__Proteobacteria	c__Alphaproteobacteria	o__Rhodobacterales	f__Rhodobacteraceae	g__JABSSC01	s__	71.04	1.54	2.44971	61.7
SE2498.metabat_spec.005_sub	d__Bacteria	p__Proteobacteria	c__Alphaproteobacteria	o__Rhodobacterales	f__Rhodobacteraceae	g__IMCC34051	s__	96.59	0.68	3.29231	49.1
SE2498.rosella_refined.038_sub	d__Bacteria	p__Verrucomicrobiota	c__Verrucomicrobiae	o__Opitutales	f__JABSRG01	g__	s__	99.14	0.43	2.53438	41
SE2498.rosella_refined.044	d__Bacteria	p__Proteobacteria	c__Gammaproteobacteria	o__Pseudomonadales	f__Cellvibrionaceae	g__	s__	94.98	1	4.95157	54.8
SE2498.vamb.005	d__Bacteria	p__Proteobacteria	c__Alphaproteobacteria	o__Geminicoccales	f__Geminicoccaceae	g__	s__	91.18	1.68	3.8534	61
SE2506.concoct.067	d__Bacteria	p__Proteobacteria	c__Alphaproteobacteria	o__Rhodobacterales	f__Rhodobacteraceae	g__JABDJO01	s__	85.04	3.47	7.66626	53.7
SE2506.maxbin.040	d__Bacteria	p__Acidobacteriota	c__Holophagae	o__Acanthopleuribacterales	f__Acanthopleuribacteraceae	g__	s__	58.78	0.22	2.14956	53.8
SE2506.metabat2_refined.022_sub	d__Bacteria	p__Proteobacteria	c__Alphaproteobacteria	o__Sphingomonadales	f__	g__	s__	99.03	0.56	4.7256	59.6
SE2506.metabat_sens.012	d__Bacteria	p__Proteobacteria	c__Alphaproteobacteria	o__Rhodobacterales	f__Rhodobacteraceae	g__Roseicyclus	s__	98.43	0.45	3.89467	64.5
SE2506.metabat_sens.014	d__Bacteria	p__Proteobacteria	c__Alphaproteobacteria	o__Rhodobacterales	f__Rhodobacteraceae	g__IMCC34051	s__	96.91	0.6	3.14761	61.6
SE2506.rosella_refined.038	d__Bacteria	p__Proteobacteria	c__Alphaproteobacteria	o__Caulobacterales	f__Hyphomonadaceae	g__	s__	90.6	1.76	6.82012	66.4
SE2506.rosella_refined.049	d__Bacteria	p__Acidobacteriota	c__Thermoanaerobaculia	o__UBA5704	f__UBA5704	g__	s__	75.41	2.3	3.86561	65.7
SE2506.semibin_refined.008	d__Bacteria	p__Planctomycetota	c__Planctomycetia	o__Pirellulales	f__Lacipirellulaceae	g__	s__	98.19	0.2	3.06923	56.5
SE2506.semibin_refined.066	d__Bacteria	p__Proteobacteria	c__Alphaproteobacteria	o__Rhizobiales	f__MH13	g__MH13	s__	96.85	1.22	2.82038	46.7
SE2506.vamb.002	d__Bacteria	p__Proteobacteria	c__Gammaproteobacteria	o__Pseudomonadales	f__GM7GCV1	g__GM7GCV1	s__	84.24	2.18	3.78137	60.2
SE2507.concoct.019	d__Bacteria	p__Proteobacteria	c__Alphaproteobacteria	o__Rhodobacterales	f__Rhodobacteraceae	g__JABSSC01	s__	92.03	1.64	3.38578	49.8
SE2507.concoct.026	d__Bacteria	p__Proteobacteria	c__Gammaproteobacteria	o__Enterobacterales	f__Shewanellaceae	g__Ferrimonas	s__	60.48	8.14	3.58952	46.1
SE2507.metabat2_refined.016_sub	d__Bacteria	p__Proteobacteria	c__Gammaproteobacteria	o__Pseudomonadales	f__Cellvibrionaceae	g__Agarilytica	s__	99.75	1.29	10.1495	38.3
SE2507.semibin_refined.008	d__Bacteria	p__Bacteroidota	c__Bacteroidia	o__Chitinophagales	f__Saprospiraceae	g__	s__	99.57	1.52	2.1843	43.8
SE2510.maxbin.024_sub	d__Bacteria	p__Proteobacteria	c__Alphaproteobacteria	o__Rhizobiales	f__OSC116	g__	s__	96.58	3.52	10.6997	66.4
SE2510.rosella_refined.035	d__Bacteria	p__Acidobacteriota	c__Thermoanaerobaculia	o__UBA5704	f__UBA5704	g__	s__	98.48	0.43	2.10119	45.1
SE2510.semibin_refined.033	d__Bacteria	p__Proteobacteria	c__Alphaproteobacteria	o__Rhizobiales	f__OSC116	g__	s__	84.21	1.41	1.42421	58.5
SE2517.concoct.031_sub	d__Bacteria	p__Proteobacteria	c__Alphaproteobacteria	o__Rhodobacterales	f__Rhodobacteraceae	g__JABDJO01	s__	54.83	3.45	1.34427	41.6
SE2517.concoct.052_sub	d__Bacteria	p__Desulfobacterota_D	c__UBA1144	o__RKRQ01	f__	g__	s__	60	0.68	1.97301	61.2
SE2517.metabat2_refined.017_sub	d__Bacteria	p__Planctomycetota	c__PLA2	o__PLA2	f__JAEUHO01	g__	s__	70.66	6.31	9.50665	67.1
SE2517.metabat2_refined.020_sub	d__Bacteria	p__Myxococcota	c__Polyangia	o__Polyangiales	f__Polyangiaceae	g__	s__	51.83	1.52	2.65941	57.3
SE2517.metabat2_refined.041	d__Bacteria	p__Proteobacteria	c__Alphaproteobacteria	o__Rhizobiales	f__HXMU1428-3	g__HXMU1428-3	s__	58.54	0	1.03369	39.8
SE2522.concoct.073_sub	d__Bacteria	p__Proteobacteria	c__Gammaproteobacteria	o__Xanthomonadales	f__SZUA-36	g__W260	s__	52.53	0.61	1.68378	41.7
SE2522.metabat2_refined.001	d__Bacteria	p__Proteobacteria	c__Alphaproteobacteria	o__Rhizobiales	f__HXMU1428-3	g__HXMU1428-3	s__	57.8	3.01	5.72769	58.3
SE2522.metabat2_refined.041_sub	d__Bacteria	p__Proteobacteria	c__Gammaproteobacteria	o__Pseudomonadales	f__Halieaceae	g__Halioglobus	s__	97.75	1.42	3.74219	57.8
SE2522.metabat_spec.004	d__Bacteria	p__Proteobacteria	c__Alphaproteobacteria	o__Rhodobacterales	f__Rhodobacteraceae	g__Thalassococcus	s__Thalassococcus halodurans	92.9	1.71	3.70991	66.7
SE2534.metabat2_refined.005	d__Bacteria	p__Proteobacteria	c__Alphaproteobacteria	o__Rhodobacterales	f__Rhodobacteraceae	g__Salipiger	s__	97.67	1.66	5.18992	66.9
SE2534.rosella_refined.021	d__Bacteria	p__Proteobacteria	c__Alphaproteobacteria	o__Rhizobiales	f__Rhizobiaceae	g__JAALLB01	s__	99.2	1.15	2.86404	48.7
SE2536.vamb.004	d__Bacteria	p__Proteobacteria	c__Alphaproteobacteria	o__Rhizobiales	f__JACESI01	g__JACESI01	s__	97.52	1	3.77074	52.3
SE2537.metabat2_refined.030	d__Bacteria	p__Acidobacteriota	c__Thermoanaerobaculia	o__UBA5704	f__UBA5704	g__	s__	90.5	3.47	8.48935	62.8
SE2540.concoct.038	d__Bacteria	p__Bacteroidota	c__Bacteroidia	o__Flavobacteriales	f__Flavobacteriaceae	g__Muricauda	s__	98.27	1.82	4.14607	38.6
SE2540.concoct.042_sub	d__Bacteria	p__Proteobacteria	c__Gammaproteobacteria	o__UBA12402	f__UBA12402	g__1-14-0-20-46-22	s__	73.87	2.3	1.62852	39.6
SE2540.concoct.145_sub	d__Bacteria	p__Proteobacteria	c__Alphaproteobacteria	o__Rhodobacterales	f__Rhodobacteraceae	g__Roseobacter	s__	90.6	1.4	4.92821	54.5
SE2540.concoct.148	d__Bacteria	p__Bacteroidota	c__Bacteroidia	o__Flavobacteriales	f__Flavobacteriaceae	g__Muricauda_A	s__	68.54	1.88	2.42501	41.8
SE2540.concoct.167	d__Bacteria	p__Proteobacteria	c__Gammaproteobacteria	o__Pseudomonadales	f__GM7GCV1	g__GM7GCV1	s__	98.7	0.42	2.89469	48.2
SE2540.metabat2_refined.034	d__Bacteria	p__Proteobacteria	c__Gammaproteobacteria	o__Pseudomonadales	f__Cellvibrionaceae	g__	s__	98.8	2.18	4.25232	46.6
SE2540.metabat2_refined.099	d__Bacteria	p__Planctomycetota	c__Phycisphaerae	o__Phycisphaerales	f__UBA1924	g__	s__	70.54	0	2.27937	69.7
SE2540.metabat2_refined.118_sub	d__Bacteria	p__Proteobacteria	c__Alphaproteobacteria	o__Rhodobacterales	f__Rhodobacteraceae	g__Roseobacter	s__	66.49	6.47	2.95402	56.5
SE2540.metabat_sspec.013_sub	d__Bacteria	p__Proteobacteria	c__Alphaproteobacteria	o__Rhizobiales	f__Tepidamorphaceae	g__	s__	87.16	2.44	3.31721	55.3
SE2540.rosella_refine.275_0	d__Bacteria	p__Proteobacteria	c__Alphaproteobacteria	o__Rhizobiales	f__Rhodobiaceae	g__	s__	80.66	1.4	4.61908	63.6
SE2540.rosella_refined.030_sub	d__Bacteria	p__Proteobacteria	c__Alphaproteobacteria	o__Kiloniellales	f__Kiloniellaceae	g__Denitrobaculum	s__	72.64	2.53	5.11982	59.4
SE2540.rosella_refined.111	d__Bacteria	p__Bacteroidota	c__Bacteroidia	o__Flavobacteriales	f__Flavobacteriaceae	g__	s__	97.58	0.33	3.73765	40.2
SE2540.rosella_refined.149	d__Bacteria	p__Proteobacteria	c__Alphaproteobacteria	o__Caulobacterales	f__Parvularculaceae	g__Parvularcula	s__	96.03	0	3.2049	57.7
SE2540.semibin_refined.022	d__Bacteria	p__Proteobacteria	c__Alphaproteobacteria	o__Rhizobiales	f__Rhizobiaceae	g__JAALLB01	s__	99.97	0.63	3.71192	50.4
SE2540.semibin_refined.035	d__Bacteria	p__Planctomycetota	c__Planctomycetia	o__Pirellulales	f__Pirellulaceae	g__Rubripirellula	s__	99.93	1.18	8.63377	55.1
SE2540.semibin_refined.106_sub	d__Bacteria	p__Proteobacteria	c__Alphaproteobacteria	o__Rhodobacterales	f__Rhodobacteraceae	g__Roseobacter	s__	90.9	1.9	3.51996	58.6
SE2540.semibin_refined.155_sub	d__Bacteria	p__Proteobacteria	c__Alphaproteobacteria	o__Caulobacterales	f__Hyphomonadaceae	g__Henriciella	s__	63.56	0	2.96358	56.8
SE2540.semibin_refined.179_sub	d__Bacteria	p__Proteobacteria	c__Alphaproteobacteria	o__Caulobacterales	f__Hyphomonadaceae	g__Henriciella	s__	62.13	0	2.87983	55.2
SE2540.vamb.004	d__Bacteria	p__Proteobacteria	c__Alphaproteobacteria	o__Rhodobacterales	f__Rhodobacteraceae	g__Roseobacter	s__	89.69	1.03	4.21005	57.4
SE2540.vamb.039	d__Bacteria	p__Proteobacteria	c__Alphaproteobacteria	o__Rhodobacterales	f__Rhodobacteraceae	g__Roseovarius	s__	96.47	0.94	3.51086	56.6
SE2540.vamb.044_sub	d__Bacteria	p__Proteobacteria	c__Alphaproteobacteria	o__Sphingomonadales	f__Sphingomonadaceae	g__Erythrobacter	s__	95.24	1.85	3.55742	56.5
SE2540.vamb.049_sub	d__Bacteria	p__Proteobacteria	c__Alphaproteobacteria	o__Rhodobacterales	f__Rhodobacteraceae	g__Roseovarius	s__	88.08	3.34	4.26314	57.7
SE2543.concoct.004_sub	d__Bacteria	p__Proteobacteria	c__Alphaproteobacteria	o__Rhodobacterales	f__Rhodobacteraceae	g__Limibaculum	s__	56.3	4	3.36251	67
SE2543.concoct.016_sub	d__Bacteria	p__Myxococcota	c__Polyangia	o__Polyangiales	f__Polyangiaceae	g__	s__	61.11	5.48	8.03596	69.9
SE2543.concoct.023_sub	d__Bacteria	p__Planctomycetota	c__Planctomycetia	o__Pirellulales	f__Lacipirellulaceae	g__	s__	54.71	1.15	2.14907	48.3
SE2543.concoct.029_sub	d__Bacteria	p__Planctomycetota	c__Phycisphaerae	o__Phycisphaerales	f__Phycisphaeraceae	g__Algisphaera	s__	88.8	2.84	4.1361	64.5
SE2543.concoct.033_sub	d__Bacteria	p__Bacteroidota	c__Bacteroidia	o__Chitinophagales	f__Saprospiraceae	g__	s__	82.97	2.12	7.18876	47.5
SE2543.concoct.037	d__Bacteria	p__Proteobacteria	c__Alphaproteobacteria	o__Rhodospirillales	f__Casp-alpha2	g__UBA4479	s__	65.35	3.02	2.21885	55.5
SE2543.concoct.059	d__Bacteria	p__Proteobacteria	c__Alphaproteobacteria	o__Rhizobiales	f__Rhodobiaceae	g__	s__	51.93	5.12	3.10165	63
SE2543.concoct.068_sub	d__Bacteria	p__Proteobacteria	c__Gammaproteobacteria	o__Xanthomonadales	f__SZUA-38	g__	s__	54.99	4.93	3.61154	64
SE2543.concoct.073	d__Bacteria	p__Proteobacteria	c__Alphaproteobacteria	o__UBA8366	f__GCA-2696645	g__	s__	51.27	0.54	2.31482	65.3
SE2543.concoct.080_sub	d__Bacteria	p__Planctomycetota	c__Planctomycetia	o__Pirellulales	f__Pirellulaceae	g__Stieleria	s__	85.42	1.76	7.47357	56.2
SE2543.concoct.087_sub	d__Bacteria	p__Cyanobacteria	c__Cyanobacteriia	o__Cyanobacteriales	f__Nostocaceae	g__Calothrix_A	s__	82.73	0.79	5.57996	39.8
SE2543.concoct.108_sub	d__Bacteria	p__Proteobacteria	c__Alphaproteobacteria	o__Rhodospirillales	f__Casp-alpha2	g__	s__	78.51	4.48	2.95608	55.5
SE2543.concoct.117	d__Bacteria	p__Proteobacteria	c__Alphaproteobacteria	o__Rhodobacterales	f__Rhodobacteraceae	g__HLUCCA09	s__	89.96	1.04	5.07065	62.1
SE2543.concoct.120	d__Bacteria	p__Proteobacteria	c__Alphaproteobacteria	o__Rhizobiales	f__Rhizobiaceae	g__JAALLB01	s__	91.26	0.9	3.61648	51.9
SE2543.concoct.130	d__Bacteria	p__Planctomycetota	c__Phycisphaerae	o__Phycisphaerales	f__UBA1924	g__	s__	50.82	1.62	2.39496	65.1
SE2543.concoct.143_sub	d__Bacteria	p__Proteobacteria	c__Gammaproteobacteria	o__Xanthomonadales	f__S139-57	g__	s__	61.33	4.89	3.65272	58.5
SE2543.concoct.149_sub	d__Bacteria	p__Proteobacteria	c__Alphaproteobacteria	o__Rhodobacterales	f__Rhodobacteraceae	g__Roseovarius	s__	84.95	2.71	3.35229	57.1
SE2543.concoct.154	d__Bacteria	p__Proteobacteria	c__Alphaproteobacteria	o__UBA8366	f__GCA-2696645	g__Hwanghaeella	s__	80.54	2.14	4.52994	61.9
SE2543.concoct.170_sub	d__Bacteria	p__Proteobacteria	c__Alphaproteobacteria	o__Rhodobacterales	f__Rhodobacteraceae	g__HLUCCA09	s__	80.72	9.19	5.44143	61
SE2543.concoct.182	d__Bacteria	p__Acidobacteriota	c__Thermoanaerobaculia	o__UBA5704	f__UBA5704	g__	s__	94.87	1.99	10.2208	66.6
SE2543.concoct.207	d__Bacteria	p__Myxococcota_A	c__UBA796	o__UBA796	f__GCA-2862545	g__	s__	70.25	2.57	5.97211	70.8
SE2543.concoct.208_sub	d__Bacteria	p__Proteobacteria	c__Alphaproteobacteria	o__Rhodobacterales	f__Rhodobacteraceae	g__JABSSC01	s__	74.06	2.8	2.8628	59.9
SE2543.concoct.217	d__Bacteria	p__Proteobacteria	c__Alphaproteobacteria	o__Rhodobacterales	f__Rhodobacteraceae	g__Roseovarius	s__	97.89	1.61	4.95941	59.2
SE2543.concoct.221	d__Bacteria	p__Bacteroidota	c__Bacteroidia	o__Flavobacteriales	f__Salibacteraceae	g__	s__	74.12	1.88	4.19183	49.4
SE2543.concoct.237	d__Bacteria	p__Acidobacteriota	c__Thermoanaerobaculia	o__UBA5704	f__UBA5704	g__	s__	56.21	4.7	6.03	64.1
SE2543.concoct.240_sub	d__Bacteria	p__Proteobacteria	c__Alphaproteobacteria	o__Rhodospirillales	f__Casp-alpha2	g__	s__	87.13	2.49	3.88765	61.4
SE2543.concoct.244	d__Bacteria	p__Bacteroidota	c__Bacteroidia	o__Chitinophagales	f__Saprospiraceae	g__	s__	96.78	3	8.98747	42.9
SE2543.concoct.249_sub	d__Bacteria	p__Planctomycetota	c__Planctomycetia	o__Pirellulales	f__Pirellulaceae	g__	s__	52.62	9.19	6.4502	55.6
SE2543.concoct.261_sub	d__Bacteria	p__Proteobacteria	c__Alphaproteobacteria	o__Rhizobiales	f__Rhizobiaceae	g__JAALLB01	s__	65.41	3.4	2.88757	48.5
SE2543.concoct.275_sub	d__Bacteria	p__Planctomycetota	c__Planctomycetia	o__Pirellulales	f__Pirellulaceae	g__	s__	70.17	9.2	5.3359	56.8
SE2543.concoct.277	d__Bacteria	p__Acidobacteriota	c__Thermoanaerobaculia	o__UBA5704	f__UBA5704	g__	s__	95.51	5.98	12.204	61.6
SE2543.concoct.279	d__Bacteria	p__Planctomycetota	c__Planctomycetia	o__Pirellulales	f__Pirellulaceae	g__Aureliella	s__	79.24	3.53	5.85975	51.2
SE2543.maxbin.009_sub	d__Bacteria	p__Proteobacteria	c__Alphaproteobacteria	o__Rhodobacterales	f__Rhodobacteraceae	g__JABDJO01	s__	75.54	1.96	3.62953	61
SE2543.maxbin.059	d__Bacteria	p__Proteobacteria	c__Alphaproteobacteria	o__Rhizobiales	f__OSC116	g__	s__	99.07	1.52	2.2701	45.4
SE2543.maxbin.154_sub	d__Bacteria	p__Acidobacteriota	c__Thermoanaerobaculia	o__UBA5704	f__UBA5704	g__	s__	67.62	9.36	8.83333	61.6
SE2543.metabat2_refined.030_sub	d__Bacteria	p__Cyanobacteria	c__Cyanobacteriia	o__PCC-7336	f__PCC-7336	g__	s__	76.5	1.41	3.66654	50
SE2543.metabat2_refined.070_sub	d__Bacteria	p__Verrucomicrobiota	c__Verrucomicrobiae	o__Opitutales	f__Opitutaceae	g__	s__	92.46	3.3	6.71029	52.1
SE2543.metabat2_refined.073	d__Bacteria	p__Proteobacteria	c__Gammaproteobacteria	o__Pseudomonadales	f__Halieaceae	g__Congregibacter	s__	98.92	1.3	5.1092	59.4
SE2543.metabat2_refined.090_sub	d__Bacteria	p__Proteobacteria	c__Alphaproteobacteria	o__Rhodobacterales	f__Rhodobacteraceae	g__JABSSC01	s__	74.18	0.95	2.47318	62.5
SE2543.metabat2_refined.123	d__Bacteria	p__Proteobacteria	c__Gammaproteobacteria	o__Ga0077536	f__Ga0077536	g__UBA11873	s__	97.36	3.46	5.34017	63
SE2543.metabat2_refined.161	d__Bacteria	p__Myxococcota	c__Polyangia	o__Nannocystales	f__Nannocystaceae	g__	s__	92	3.8	8.73496	63
SE2543.rosella_refined.061	d__Bacteria	p__Bacteroidota	c__Bacteroidia	o__Flavobacteriales	f__Crocinitomicaceae	g__UBA4466	s__	91.5	0.54	4.46665	43.6
SE2543.rosella_refined.091_sub	d__Bacteria	p__Proteobacteria	c__Gammaproteobacteria	o__Pseudomonadales	f__GM7GCV1	g__GM7GCV1	s__	56.35	0.37	1.514	49
SE2543.semibin_refined.001	d__Bacteria	p__Verrucomicrobiota	c__Verrucomicrobiae	o__Verrucomicrobiales	f__DEV007	g__Arctic95D-9	s__	100	2.72	5.30893	55.5
SE2543.semibin_refined.011	d__Bacteria	p__Proteobacteria	c__Gammaproteobacteria	o__Pseudomonadales	f__Cellvibrionaceae	g__Agarilytica	s__	92.99	1.81	5.12941	46.1
SE2543.semibin_refined.018	d__Bacteria	p__Cyanobacteria	c__Cyanobacteriia	o__Cyanobacteriales	f__Microcystaceae_A	g__Crocosphaera	s__	80.57	1.06	4.62094	37.4
SE2543.semibin_refined.021_sub	d__Bacteria	p__Proteobacteria	c__Alphaproteobacteria	o__Rhodobacterales	f__Rhodobacteraceae	g__JABDJO01	s__	75.09	1.34	3.17861	59.3
SE2543.semibin_refined.037	d__Bacteria	p__Bacteroidota	c__Bacteroidia	o__Chitinophagales	f__Saprospiraceae	g__CAJQQY01	s__	98.84	2.72	7.01881	39.1
SE2543.semibin_refined.038_sub	d__Bacteria	p__Proteobacteria	c__Alphaproteobacteria	o__Rhodobacterales	f__Rhodobacteraceae	g__Sulfitobacter	s__	51.42	1.13	2.22671	60
SE2543.semibin_refined.046	d__Bacteria	p__Proteobacteria	c__Alphaproteobacteria	o__Rhizobiales	f__HXMU1428-3	g__HXMU1428-3	s__	97.72	1.88	5.01925	44.4
SE2543.semibin_refined.129	d__Bacteria	p__Myxococcota	c__JACPTQ01	o__	f__	g__	s__	97.42	4.39	11.5232	68.7
SE2543.semibin_refined.168_sub	d__Bacteria	p__Proteobacteria	c__Alphaproteobacteria	o__Caulobacterales	f__Hyphomonadaceae	g__Henriciella	s__	96.03	1.06	3.17752	59.3
SE2543.semibin_refined.226	d__Bacteria	p__Proteobacteria	c__Gammaproteobacteria	o__SZUA-229	f__SZUA-229	g__S139-92	s__	97.96	0.94	2.77448	58.2
SE2543.semibin_refined.247	d__Bacteria	p__Proteobacteria	c__Alphaproteobacteria	o__Rhizobiales	f__Methyloligellaceae	g__	s__	75.88	1.06	3.86254	57.4
SE2543.vamb.033	d__Bacteria	p__Planctomycetota	c__Phycisphaerae	o__Phycisphaerales	f__UBA1924	g__	s__	95.97	1.7	3.79715	71.1
SE2543.vamb.052	d__Bacteria	p__Proteobacteria	c__Alphaproteobacteria	o__Rhodobacterales	f__Rhodobacteraceae	g__Tropicimonas	s__	97.54	0.76	4.88212	58.6
SE2543.vamb.057	d__Bacteria	p__Verrucomicrobiota	c__Verrucomicrobiae	o__Verrucomicrobiales	f__DEV007	g__Arctic95D-9	s__	100	1.7	5.95496	52.9
SE2543.vamb.059_sub	d__Bacteria	p__Proteobacteria	c__Alphaproteobacteria	o__Rhizobiales	f__Rhizobiaceae	g__Roseitalea	s__	86.68	2.51	3.11146	55.8
SE2543.vamb.080	d__Bacteria	p__Patescibacteria	c__JAEDAM01	o__BD1-5	f__UBA6164	g__JAACSU01	s__	65.99	0.28	1.01588	37
SE2544.concoct.023	d__Bacteria	p__Proteobacteria	c__Alphaproteobacteria	o__Caulobacterales	f__Hyphomonadaceae	g__Henriciella	s__	87.66	1.7	3.02912	55.2
SE2544.concoct.204_sub	d__Bacteria	p__Acidobacteriota	c__Thermoanaerobaculia	o__UBA5704	f__UBA5704	g__	s__	66	1.49	5.50404	65.9
SE2544.metabat2_refined.040_sub	d__Bacteria	p__Proteobacteria	c__Alphaproteobacteria	o__Rhodobacterales	f__Rhodobacteraceae	g__HLUCCA09	s__	84.57	3.49	4.81875	66.8
SE2544.metabat2_refined.093_sub	d__Bacteria	p__Proteobacteria	c__Alphaproteobacteria	o__Rhodobacterales	f__Rhodobacteraceae	g__JABDJO01	s__	82.73	3.1	3.52604	60.9
SE2544.semibin_refined.112	d__Bacteria	p__Bacteroidota	c__Rhodothermia	o__Balneolales	f__Balneolaceae	g__HXMU1420-13	s__	99.44	1.74	3.72582	41.5
SE2544.semibin_refined.151	d__Bacteria	p__Cyanobacteria	c__Cyanobacteriia	o__Cyanobacteriales	f__Geitlerinemaceae	g__LEGE-11467	s__	98.82	1.18	7.84508	50.2
SE2544.vamb.027	d__Bacteria	p__Bacteroidota	c__Bacteroidia	o__Cytophagales	f__	g__	s__	56.36	0.82	0.703856	37
SE2548.concoct.022_sub	d__Bacteria	p__Proteobacteria	c__Alphaproteobacteria	o__Rhizobiales	f__Methyloligellaceae	g__UBA2767	s__	50.97	2.68	1.83304	60.4
SE2548.semibin_refined.051	d__Bacteria	p__Proteobacteria	c__Alphaproteobacteria	o__Rhizobiales	f__	g__	s__	92.76	0.85	3.46853	55.2
SE2550.concoct.072	d__Bacteria	p__Cyanobacteria	c__Cyanobacteriia	o__Phormidesmiales	f__Phormidesmiaceae	g__PCC-6406	s__	87.64	3.65	4.82662	53.7
SE2550.concoct.206_sub	d__Bacteria	p__Proteobacteria	c__Alphaproteobacteria	o__Rhizobiales	f__Methyloligellaceae	g__	s__	50.27	9.35	3.53634	58.8
SE2550.maxbin.045	d__Bacteria	p__Proteobacteria	c__Alphaproteobacteria	o__Rhodobacterales	f__Rhodobacteraceae	g__Roseicyclus	s__	99.7	2.02	4.66889	60.4
SE2550.maxbin.073_sub	d__Bacteria	p__Bacteroidota	c__Bacteroidia	o__Flavobacteriales	f__Salibacteraceae	g__	s__	63.82	3.92	4.75018	49.9
SE2550.maxbin.086_sub	d__Bacteria	p__Proteobacteria	c__Gammaproteobacteria	o__Coxiellales	f__Coxiellaceae	g__	s__	96.51	4.1	2.2007	42.8
SE2550.maxbin.089	d__Bacteria	p__Cyanobacteria	c__Cyanobacteriia	o__Phormidesmiales	f__Phormidesmiaceae	g__	s__	95.22	7.76	6.59982	52.3
SE2550.metabat2_refined.046	d__Bacteria	p__Proteobacteria	c__Gammaproteobacteria	o__PIVX01	f__PIVX01	g__	s__	85.87	4.1	1.97451	31.2
SE2550.metabat2_refined.065_sub	d__Bacteria	p__Proteobacteria	c__Alphaproteobacteria	o__Rhodobacterales	f__Rhodobacteraceae	g__JABDJO01	s__	97.53	0.31	4.03963	60.6
SE2550.metabat_sspec.023	d__Bacteria	p__Proteobacteria	c__Gammaproteobacteria	o__Pseudomonadales	f__HTCC2089	g__UBA4421	s__	93.15	3.12	5.16557	56.5
SE2550.rosella_refined.017	d__Bacteria	p__Proteobacteria	c__Alphaproteobacteria	o__Rhizobiales	f__Afifellaceae	g__	s__	56.98	0.2	2.13663	54.7
SE2550.rosella_refined.022	d__Bacteria	p__Actinobacteriota	c__Acidimicrobiia	o__Acidimicrobiales	f__SHLQ01	g__SHLQ01	s__	92.31	1.28	4.94404	67
SE2550.rosella_refined.086	d__Bacteria	p__Actinobacteriota	c__Acidimicrobiia	o__Acidimicrobiales	f__UBA11606	g__UBA11606	s__	96.58	8.37	4.80734	68.7
SE2550.semibin_refined.021	d__Bacteria	p__Acidobacteriota	c__Thermoanaerobaculia	o__UBA5704	f__UBA5704	g__	s__	96.15	6.27	10.8715	62.5
SE2550.semibin_refined.109	d__Bacteria	p__Myxococcota	c__Polyangia	o__Nannocystales	f__Nannocystaceae	g__	s__	71.49	2.13	9.38998	69.1
SE2550.semibin_refined.157	d__Bacteria	p__Proteobacteria	c__Gammaproteobacteria	o__Coxiellales	f__Coxiellaceae	g__	s__	97.09	0.58	2.25271	39.7
SE2550.vamb.038	d__Bacteria	p__Planctomycetota	c__Planctomycetia	o__Pirellulales	f__Pirellulaceae	g__	s__	96.29	1.5	7.78737	48.4
SE2553.concoct.002_sub	d__Bacteria	p__Cyanobacteria	c__Cyanobacteriia	o__Cyanobacteriales	f__Rubidibacteraceae	g__Rubidibacter	s__	68.65	1.86	3.00471	56.1
SE2553.concoct.015_sub	d__Bacteria	p__Proteobacteria	c__Alphaproteobacteria	o__Rhodobacterales	f__Rhodobacteraceae	g__Dinoroseobacter	s__	62.7	2.37	2.87245	61
SE2553.concoct.048_sub	d__Bacteria	p__Proteobacteria	c__Alphaproteobacteria	o__Rhodobacterales	f__Rhodobacteraceae	g__IMCC34051	s__	89.48	1.68	3.74694	60.6
SE2553.concoct.053_sub	d__Bacteria	p__Planctomycetota	c__Planctomycetia	o__Pirellulales	f__Pirellulaceae	g__Mariniblastus	s__	82.87	0.76	5.3094	51
SE2553.concoct.057	d__Bacteria	p__Planctomycetota	c__Planctomycetia	o__Planctomycetales	f__Planctomycetaceae	g__	s__	81.33	0.29	5.38175	60.4
SE2553.concoct.061	d__Bacteria	p__Proteobacteria	c__Alphaproteobacteria	o__Rhizobiales	f__Rhizobiaceae	g__Roseitalea	s__	97.87	2.65	3.81983	59
SE2553.concoct.088_sub	d__Bacteria	p__Proteobacteria	c__Alphaproteobacteria	o__Kiloniellales	f__J153	g__	s__	65.32	2.17	4.05255	66.9
SE2553.concoct.128	d__Bacteria	p__Cyanobacteria	c__Cyanobacteriia	o__Thermosynechococcales	f__Thermosynechococcaceae	g__RCC1774	s__	52.31	1.97	3.05017	51.1
SE2553.concoct.133	d__Bacteria	p__Cyanobacteria	c__Cyanobacteriia	o__PCC-7336	f__PCC-7336	g__PCC-7336	s__	85.57	0.88	4.31915	51.6
SE2553.concoct.162_sub	d__Bacteria	p__Proteobacteria	c__Alphaproteobacteria	o__Caulobacterales	f__Parvularculaceae	g__Marinicaulis	s__	95.47	1.6	3.3698	57.3
SE2553.concoct.164	d__Bacteria	p__Proteobacteria	c__Alphaproteobacteria	o__Rhizobiales	f__Rhizobiaceae	g__Roseitalea	s__	97.98	1.3	4.07406	61.1
SE2553.concoct.201_sub	d__Bacteria	p__Proteobacteria	c__Alphaproteobacteria	o__Rhizobiales	f__Rhizobiaceae	g__JAALLB01	s__	53.19	1.91	1.71864	48.7
SE2553.concoct.220_sub	d__Bacteria	p__Myxococcota_A	c__UBA9160	o__UBA9160	f__UBA4427	g__UBA4427	s__	77.79	1.36	6.32378	69.4
SE2553.concoct.226_sub	d__Bacteria	p__Planctomycetota	c__Planctomycetia	o__Pirellulales	f__Pirellulaceae	g__Stieleria	s__	59.99	1.31	7.68592	57.2
SE2553.concoct.261	d__Bacteria	p__Cyanobacteria	c__Vampirovibrionia	o__Obscuribacterales	f__Obscuribacteraceae	g__RI-106	s__	88.21	3.13	5.55961	40.6
SE2553.concoct.263_sub	d__Bacteria	p__Proteobacteria	c__Gammaproteobacteria	o__Pseudomonadales	f__Cellvibrionaceae	g__	s__	65.08	3.71	2.35943	43.2
SE2553.maxbin.076_sub	d__Bacteria	p__Proteobacteria	c__Alphaproteobacteria	o__Rhodobacterales	f__Rhodobacteraceae	g__Roseobacter	s__	88.8	2.01	4.33985	57
SE2553.maxbin.083	d__Bacteria	p__Proteobacteria	c__Alphaproteobacteria	o__Sphingomonadales	f__Sphingomonadaceae	g__Parasphingopyxis	s__	99.2	0.51	3.00797	61.7
SE2553.maxbin.114_sub	d__Bacteria	p__Planctomycetota	c__Planctomycetia	o__Planctomycetales	f__Planctomycetaceae	g__	s__	72.6	2.81	6.36605	55
SE2553.maxbin.125	d__Bacteria	p__Planctomycetota	c__Planctomycetia	o__Pirellulales	f__Pirellulaceae	g__Mariniblastus	s__	91.12	6.06	6.627	49.6
SE2553.maxbin.152	d__Bacteria	p__Planctomycetota	c__Planctomycetia	o__Pirellulales	f__Pirellulaceae	g__	s__	80.25	7.18	8.41465	59.7
SE2553.metabat2_refined.028_sub	d__Bacteria	p__Cyanobacteria	c__Cyanobacteriia	o__Cyanobacteriales	f__JAAUTE01	g__	s__	91.05	3.38	4.28732	48
SE2553.metabat2_refined.066	d__Bacteria	p__Acidobacteriota	c__Thermoanaerobaculia	o__UBA5704	f__UBA5704	g__	s__	98.08	3.47	11.5816	59.8
SE2553.metabat2_refined.068_sub	d__Bacteria	p__Proteobacteria	c__Alphaproteobacteria	o__Sphingomonadales	f__Sphingomonadaceae	g__Parasphingopyxis	s__	90.52	0.76	2.64229	59.7
SE2553.metabat2_refined.071_sub	d__Bacteria	p__Planctomycetota	c__Phycisphaerae	o__Phycisphaerales	f__UBA1924	g__	s__	57.82	3.71	2.22593	67.7
SE2553.metabat2_refined.121_sub	d__Bacteria	p__Proteobacteria	c__Gammaproteobacteria	o__	f__	g__	s__	82.38	2.45	1.29976	43.3
SE2553.metabat2_refined.125	d__Bacteria	p__Acidobacteriota	c__Thermoanaerobaculia	o__UBA5704	f__UBA5704	g__	s__	55.17	1.8	5.61215	64.2
SE2553.metabat2_refined.160	d__Bacteria	p__Proteobacteria	c__Alphaproteobacteria	o__Caulobacterales	f__Parvularculaceae	g__	s__	97.97	0.8	3.26207	56.1
SE2553.metabat2_refined.171	d__Bacteria	p__Bacteroidota	c__Bacteroidia	o__Flavobacteriales	f__Flavobacteriaceae	g__Winogradskyella	s__	80.55	2.39	3.43651	34.5
SE2553.metabat2_refined.179_sub	d__Bacteria	p__Planctomycetota	c__Planctomycetia	o__Pirellulales	f__Pirellulaceae	g__	s__	91.33	1.41	7.54497	49.6
SE2553.metabat2_refined.207_sub	d__Bacteria	p__Bacteroidota	c__Bacteroidia	o__Chitinophagales	f__Saprospiraceae	g__CAJQQY01	s__	80.28	8.26	7.32855	37.1
SE2553.metabat_sens.049_sub	d__Bacteria	p__Planctomycetota	c__Planctomycetia	o__Pirellulales	f__Lacipirellulaceae	g__	s__	95.66	2.47	4.90179	65
SE2553.rosella_refined.009_sub	d__Bacteria	p__Planctomycetota	c__Planctomycetia	o__Pirellulales	f__Pirellulaceae	g__	s__	98.75	1.18	5.94503	60
SE2553.rosella_refined.016	d__Bacteria	p__Planctomycetota	c__Planctomycetia	o__Pirellulales	f__Pirellulaceae	g__CAJQPP01	s__	98.75	3.53	6.54436	51.4
SE2553.rosella_refined.024_sub	d__Bacteria	p__Proteobacteria	c__Alphaproteobacteria	o__Rhodobacterales	f__Rhodobacteraceae	g__Ruegeria	s__	64.52	1.72	4.13872	57.7
SE2553.rosella_refined.030	d__Bacteria	p__Proteobacteria	c__Alphaproteobacteria	o__UBA8366	f__GCA-2696645	g__	s__	97.75	1.74	4.67637	64.4
SE2553.rosella_refined.088	d__Bacteria	p__Chlamydiota	c__Chlamydiia	o__Chlamydiales	f__Simkaniaceae	g__Neptunochlamydia	s__	93.58	0.34	1.8935	39.9
SE2553.semibin_refined.026	d__Bacteria	p__Myxococcota	c__Polyangia	o__Polyangiales	f__SG8-38	g__	s__	60	1.29	2.98707	64.7
SE2553.semibin_refined.050	d__Bacteria	p__Proteobacteria	c__Alphaproteobacteria	o__Rhodobacterales	f__Rhodobacteraceae	g__Tropicimonas	s__	78.63	2.48	4.06508	63.9
SE2553.semibin_refined.052	d__Bacteria	p__Proteobacteria	c__Alphaproteobacteria	o__Geminicoccales	f__Geminicoccaceae	g__	s__	66.22	1.91	3.49	59.1
SE2553.semibin_refined.063	d__Bacteria	p__Proteobacteria	c__Gammaproteobacteria	o__Enterobacterales	f__	g__	s__	93.69	0.54	4.72124	45.4
SE2553.semibin_refined.103	d__Bacteria	p__Acidobacteriota	c__Thermoanaerobaculia	o__UBA5704	f__UBA5704	g__	s__	96.01	3.42	9.42005	60.8
SE2553.semibin_refined.191	d__Bacteria	p__Proteobacteria	c__Alphaproteobacteria	o__Sphingomonadales	f__Sphingomonadaceae	g__Parasphingorhabdus	s__	90.88	1.09	3.39057	52.5
SE2553.semibin_refined.194	d__Bacteria	p__Proteobacteria	c__Alphaproteobacteria	o__Rhizobiales	f__Rhizobiaceae	g__JAALLB01	s__	98.39	2.24	3.76672	50.3
SE2553.semibin_refined.202	d__Bacteria	p__Proteobacteria	c__Alphaproteobacteria	o__Rhodobacterales	f__Rhodobacteraceae	g__IMCC34051	s__	93.18	0.56	4.16793	60.5
SE2553.semibin_refined.210	d__Bacteria	p__Proteobacteria	c__Alphaproteobacteria	o__Rhodobacterales	f__Rhodobacteraceae	g__Roseovarius	s__	88.11	2.03	3.79465	59.4
SE2553.semibin_refined.213	d__Bacteria	p__Verrucomicrobiota	c__Verrucomicrobiae	o__Verrucomicrobiales	f__Akkermansiaceae	g__	s__	99.18	0.68	4.22895	51.9
SE2553.semibin_refined.217_sub	d__Bacteria	p__Proteobacteria	c__Alphaproteobacteria	o__Rhodobacterales	f__Rhodobacteraceae	g__JABDJO01	s__	90.11	2.11	3.78551	57.7
SE2553.semibin_refined.229	d__Bacteria	p__Proteobacteria	c__Alphaproteobacteria	o__Kiloniellales	f__Kiloniellaceae	g__Denitrobaculum	s__	86.72	0.23	5.04201	60.7
SE2553.semibin_refined.250	d__Bacteria	p__Verrucomicrobiota	c__Verrucomicrobiae	o__Opitutales	f__Opitutaceae	g__	s__	96.85	5.13	5.9688	52.3
SE2553.semibin_refined.252	d__Bacteria	p__Proteobacteria	c__Alphaproteobacteria	o__Caulobacterales	f__Parvularculaceae	g__Parvularcula	s__	90.06	2	3.082	59.3
SE2553.semibin_refined.274_sub	d__Bacteria	p__Cyanobacteria	c__Cyanobacteriia	o__Cyanobacteriales	f__JAAUTE01	g__JAAUTE01	s__	88.97	1.61	3.98402	48.2
SE2553.semibin_refined.276	d__Bacteria	p__Proteobacteria	c__Alphaproteobacteria	o__DSM-16000	f__Inquilinaceae	g__	s__	79.04	2.54	3.94651	61.9
SE2553.semibin_refined.280	d__Bacteria	p__Proteobacteria	c__Gammaproteobacteria	o__	f__	g__	s__	83.24	1.94	1.67032	38.7
SE2553.semibin_refined.288	d__Bacteria	p__Proteobacteria	c__Alphaproteobacteria	o__Caulobacterales	f__Hyphomonadaceae	g__UBA5336	s__	99.68	0.65	3.86987	56.2
SE2553.vamb.082	d__Bacteria	p__Planctomycetota	c__Planctomycetia	o__Pirellulales	f__Lacipirellulaceae	g__Bythopirellula	s__	95.33	0	5.41882	55.8
SE6768.concoct.013	d__Bacteria	p__Proteobacteria	c__Alphaproteobacteria	o__Micavibrionales	f__Micavibrionaceae	g__	s__	91.18	2.61	2.16541	44.1
SE6768.concoct.032_sub	d__Bacteria	p__Bacteroidota	c__Bacteroidia	o__Flavobacteriales	f__Salibacteraceae	g__UBA6049	s__	69.49	2.2	2.74378	40.2
SE6768.concoct.086_sub	d__Bacteria	p__Proteobacteria	c__Alphaproteobacteria	o__Rhodobacterales	f__Rhodobacteraceae	g__HLUCCA09	s__	54.83	0.4	3.73859	66.6
SE6768.concoct.116_sub	d__Bacteria	p__Proteobacteria	c__Alphaproteobacteria	o__Rhodobacterales	f__Rhodobacteraceae	g__Roseicyclus	s__	69.34	4.31	3.50247	62.5
SE6768.concoct.134	d__Bacteria	p__Proteobacteria	c__Alphaproteobacteria	o__TMED2	f__TMED2	g__TMED2	s__TMED2 sp019192455	51.3	1.09	1.65987	58.1
SE6768.maxbin.020	d__Bacteria	p__Acidobacteriota	c__Holophagae	o__Acanthopleuribacterales	f__Acanthopleuribacteraceae	g__	s__	98.29	1.71	6.28748	54.8
SE6768.maxbin.057_sub	d__Bacteria	p__Proteobacteria	c__Gammaproteobacteria	o__Pseudomonadales	f__Oleiphilaceae	g__PZPK01	s__	69.46	9.42	4.18039	45
SE6768.metabat2_refined.043	d__Bacteria	p__Patescibacteria	c__Paceibacteria	o__UBA9983_A	f__UBA918	g__	s__	63.08	0.85	1.0607	47.2
SE6768.metabat2_refined.090	d__Bacteria	p__Bacteroidota	c__Bacteroidia	o__Cytophagales	f__	g__	s__	56.36	0	0.506833	36.5
SE6768.metabat_sens.018	d__Bacteria	p__Proteobacteria	c__Alphaproteobacteria	o__Rhodobacterales	f__Rhodobacteraceae	g__Actibacterium	s__	97.06	2.38	2.96657	60
SE6768.metabat_sspec.012	d__Bacteria	p__Proteobacteria	c__Alphaproteobacteria	o__Rhodobacterales	f__Rhodobacteraceae	g__SAT37	s__SAT37 sp002706605	95.7	2.72	3.25124	61
SE6768.metabat_sspec.035	d__Bacteria	p__Bacteroidota	c__Bacteroidia	o__Cytophagales	f__	g__	s__	56.34	0	0.597583	36.4
SE6768.metabat_sspec.048_sub	d__Bacteria	p__Proteobacteria	c__Alphaproteobacteria	o__Rhodobacterales	f__Rhodobacteraceae	g__Limibaculum	s__	78.23	3.11	4.63222	63.9
SE6768.rosella_refined.078	d__Bacteria	p__Proteobacteria	c__Alphaproteobacteria	o__Rhodobacterales	f__Rhodobacteraceae	g__Cognatishimia	s__Cognatishimia activa_A	97.73	0.67	3.52502	56.8
SE6768.semibin_refined.028	d__Bacteria	p__Proteobacteria	c__Alphaproteobacteria	o__Caulobacterales	f__Hyphomonadaceae	g__Henriciella	s__	77.24	3.45	3.38167	56.2
SE6771.metabat_sens.004_sub	d__Bacteria	p__Proteobacteria	c__Alphaproteobacteria	o__Rhodobacterales	f__Rhodobacteraceae	g__JABSSC01	s__	52.37	8.08	3.0738	62.5
SE6771.semibin_refined.039	d__Bacteria	p__Proteobacteria	c__Gammaproteobacteria	o__HTCC5015	f__HTCC5015	g__	s__	94.3	1.35	2.56815	39.3
SE6771.vamb.012	d__Bacteria	p__Proteobacteria	c__Gammaproteobacteria	o__Enterobacterales	f__Alteromonadaceae	g__Alteromonas	s__Alteromonas macleodii	99.37	0.45	4.308	44.8
SE6773.concoct.001	d__Bacteria	p__Proteobacteria	c__Alphaproteobacteria	o__Caulobacterales	f__Hyphomonadaceae	g__Hyphomonas	s__	98.99	0.06	3.59794	56.1
SE6773.semibin_refined.012	d__Bacteria	p__Proteobacteria	c__Alphaproteobacteria	o__Rhodobacterales	f__Rhodobacteraceae	g__Amylibacter	s__	94.66	0.63	2.98409	45.1
SE6792.concoct.020	d__Bacteria	p__Proteobacteria	c__Alphaproteobacteria	o__Thalassobaculales	f__Thalassobaculaceae	g__Nisaea	s__	52.75	0.3	2.65826	63.7
SE6792.concoct.056	d__Bacteria	p__Bacteroidota	c__Bacteroidia	o__Flavobacteriales	f__Flavobacteriaceae	g__Polaribacter	s__	67.93	1.25	3.28406	31.1
SE6792.concoct.068_sub	d__Bacteria	p__Proteobacteria	c__Alphaproteobacteria	o__Caulobacterales	f__Hyphomonadaceae	g__Ponticaulis	s__	63.12	1.94	2.29683	55.5
SE6792.maxbin.039_sub	d__Bacteria	p__Bacteroidota	c__Bacteroidia	o__Flavobacteriales	f__	g__	s__	61.9	4.3	5.16014	53.4
SE6792.metabat2_refined.005_sub	d__Bacteria	p__Proteobacteria	c__Gammaproteobacteria	o__Enterobacterales	f__	g__	s__	52.85	2.7	3.44645	42.2
SE6792.metabat2_refined.008_sub	d__Bacteria	p__Proteobacteria	c__Alphaproteobacteria	o__Rhodobacterales	f__Rhodobacteraceae	g__Pseudoprimorskyibacter	s__	88.83	6.76	4.83293	59.8
SE6792.metabat_sspec.009_sub	d__Bacteria	p__Proteobacteria	c__Alphaproteobacteria	o__Caulobacterales	f__Hyphomonadaceae	g__Henriciella	s__	95.19	0.72	2.86512	54.6
SE6792.rosella_refined.012	d__Bacteria	p__Proteobacteria	c__Alphaproteobacteria	o__Rhodobacterales	f__Rhodobacteraceae	g__Leisingera	s__	98.45	1.04	4.83147	63.6
SE6792.semibin_refined.075	d__Bacteria	p__Proteobacteria	c__Alphaproteobacteria	o__Rhodobacterales	f__Rhodobacteraceae	g__Roseicyclus	s__	97.16	0.45	4.44562	58.5
SE6792.semibin_refined.081	d__Bacteria	p__Patescibacteria	c__Saccharimonadia	o__Saccharimonadales	f__	g__	s__	65.81	4.17	1.21561	47.2
SE6792.semibin_refined.082	d__Bacteria	p__Proteobacteria	c__Alphaproteobacteria	o__Micavibrionales	f__Micavibrionaceae	g__UBA1672	s__	90.66	0.47	2.31538	42.9
SE6792.vamb.005	d__Bacteria	p__Acidobacteriota	c__Thermoanaerobaculia	o__UBA5704	f__UBA5704	g__	s__	97.01	5.13	10.3662	64.3
SE6793.maxbin.001	d__Bacteria	p__Proteobacteria	c__Alphaproteobacteria	o__Rhodobacterales	f__Rhodobacteraceae	g__	s__	97.67	0.4	3.1995	58
SE6793.metabat2_refined.001	d__Bacteria	p__Proteobacteria	c__Gammaproteobacteria	o__Enterobacterales	f__Alteromonadaceae	g__Alteromonas	s__	99.89	0.51	4.96143	49
SE6793.metabat2_refined.012	d__Bacteria	p__Acidobacteriota	c__Thermoanaerobaculia	o__UBA5704	f__UBA5704	g__	s__	93.91	2.95	9.34952	62.4
SE6793.metabat_sspec.005	d__Bacteria	p__Proteobacteria	c__Alphaproteobacteria	o__Rhodobacterales	f__Rhodobacteraceae	g__	s__	98.01	1	4.0717	61.8
SE6798.concoct.006	d__Bacteria	p__Bacteroidota	c__Bacteroidia	o__Cytophagales	f__Cyclobacteriaceae	g__Ekhidna	s__	64.44	3.12	3.38545	45.2
SE6798.concoct.023_sub	d__Bacteria	p__Proteobacteria	c__Alphaproteobacteria	o__Rhodobacterales	f__Rhodobacteraceae	g__Epibacterium	s__	54.24	5.55	2.68378	58.1
SE6798.maxbin.030_sub	d__Bacteria	p__Proteobacteria	c__Gammaproteobacteria	o__Pseudomonadales	f__Oleiphilaceae	g__Marinobacter	s__	98.13	1.64	3.81366	58.7
SE6798.metabat2_refined.003	d__Bacteria	p__Proteobacteria	c__Alphaproteobacteria	o__Rickettsiales	f__UBA3002	g__	s__	97.8	0	2.08406	46.9
SE6798.metabat2_refined.036	d__Bacteria	p__Proteobacteria	c__Gammaproteobacteria	o__JABCZS01	f__JABCZS01	g__	s__	91.47	1	3.35722	39.8
SE6798.metabat_sens.003	d__Bacteria	p__Proteobacteria	c__Gammaproteobacteria	o__Pseudomonadales	f__Nitrincolaceae	g__Neptuniibacter	s__	99.34	0.47	4.32754	48.8
SE6798.rosella_refined.077	d__Bacteria	p__Proteobacteria	c__Gammaproteobacteria	o__Pseudomonadales	f__Marinomonadaceae	g__Marinomonas	s__Marinomonas communis	98.56	0	3.78422	45.7
SE6798.semibin_refined.047_sub	d__Bacteria	p__Proteobacteria	c__Gammaproteobacteria	o__Pseudomonadales	f__Oleiphilaceae	g__Marinobacter	s__Marinobacter salsuginis	55.81	0.68	2.43655	58.1
SE6798.semibin_refined.063_sub	d__Bacteria	p__Proteobacteria	c__Gammaproteobacteria	o__Pseudomonadales	f__Cellvibrionaceae	g__	s__	100	0.52	4.11816	44.1
SE6801.rosella_refined.067	d__Bacteria	p__Proteobacteria	c__Alphaproteobacteria	o__Micavibrionales	f__Micavibrionaceae	g__UBA2638	s__	93.48	0.43	1.90495	50.3
SE6803.concoct.071_sub	d__Bacteria	p__Proteobacteria	c__Alphaproteobacteria	o__Rhodobacterales	f__Rhodobacteraceae	g__Aestuariivita	s__	58.71	1.05	2.63941	59.3
SE6803.metabat2_refined.022	d__Bacteria	p__Acidobacteriota	c__Holophagae	o__Acanthopleuribacterales	f__Acanthopleuribacteraceae	g__	s__	87.59	1.71	11.8795	52.8
SE6803.metabat2_refined.052	d__Bacteria	p__Proteobacteria	c__Alphaproteobacteria	o__Rhodobacterales	f__Rhodobacteraceae	g__Salibaculum	s__	60.71	2.7	2.80516	61.5
SE6803.metabat2_refined.054	d__Bacteria	p__Proteobacteria	c__Alphaproteobacteria	o__Rhodobacterales	f__Rhodobacteraceae	g__Amylibacter	s__	95.92	0.67	2.85936	49
SE6803.rosella_refined.065	d__Bacteria	p__Proteobacteria	c__Gammaproteobacteria	o__JAFEDO01	f__JAFEDO01	g__	s__	92.7	0.58	1.50497	45.7
SE6805.concoct.031_sub	d__Bacteria	p__Proteobacteria	c__Alphaproteobacteria	o__Rhodobacterales	f__Rhodobacteraceae	g__Thalassobius	s__Thalassobius sp002708925	99.34	0.34	3.51303	61.6
SE6805.concoct.127	d__Bacteria	p__Bacteroidota	c__Bacteroidia	o__Chitinophagales	f__Saprospiraceae	g__	s__	76.42	1.16	3.31586	39.2
SE6805.rosella_refined.060	d__Bacteria	p__Proteobacteria	c__Gammaproteobacteria	o__Pseudomonadales	f__Oleiphilaceae	g__Marinobacter	s__	90.05	0.75	3.20649	63.1
SE6805.rosella_refined.065	d__Bacteria	p__Proteobacteria	c__Gammaproteobacteria	o__Pseudomonadales	f__Nitrincolaceae	g__Neptuniibacter	s__	99.38	0	3.21678	45.5
SE6805.semibin_refined.043_sub	d__Bacteria	p__Proteobacteria	c__Gammaproteobacteria	o__Pseudomonadales	f__Cellvibrionaceae	g__	s__	68.08	1.4	2.96111	49
SE6805.semibin_refined.077_sub	d__Bacteria	p__Proteobacteria	c__Alphaproteobacteria	o__Rhizobiales	f__HXMU1428-3	g__HXMU1428-3	s__HXMU1428-3 sp017640685	77.71	0.6	2.51031	41.5
SE6808.concoct.067	d__Bacteria	p__Bacteroidota	c__Bacteroidia	o__Flavobacteriales	f__Flavobacteriaceae	g__	s__	81.07	1.59	5.08992	41.3
SE6808.concoct.088_sub	d__Bacteria	p__Proteobacteria	c__Alphaproteobacteria	o__Rhodobacterales	f__Rhodobacteraceae	g__	s__	77.32	1.35	4.09396	66.1
SE6808.concoct.104_sub	d__Bacteria	p__Proteobacteria	c__Alphaproteobacteria	o__Rhodobacterales	f__Rhodobacteraceae	g__Dinoroseobacter	s__	58.29	5.82	3.20669	63.7
SE6808.concoct.170_sub	d__Bacteria	p__Proteobacteria	c__Alphaproteobacteria	o__Rhodobacterales	f__Rhodobacteraceae	g__Shimia	s__	69.58	2.27	3.4561	56.8
SE6808.maxbin.054	d__Bacteria	p__Proteobacteria	c__Gammaproteobacteria	o__Pseudomonadales	f__Nitrincolaceae	g__Neptuniibacter	s__	99.44	0.74	3.77504	46.1
SE6808.metabat2_refined.019_sub	d__Bacteria	p__Bacteroidota	c__Bacteroidia	o__Chitinophagales	f__Saprospiraceae	g__DT-110	s__	59.85	3.82	5.35569	39.8
SE6808.metabat2_refined.026_sub	d__Bacteria	p__Proteobacteria	c__Alphaproteobacteria	o__Rhodobacterales	f__Rhodobacteraceae	g__Roseicyclus	s__	58.54	9.63	2.96574	60.9
SE6808.metabat2_refined.033_sub	d__Bacteria	p__Proteobacteria	c__Alphaproteobacteria	o__Rhizobiales	f__Rhizobiaceae	g__Ahrensia	s__	95.38	3.49	3.45025	51.2
SE6808.metabat2_refined.038	d__Bacteria	p__Proteobacteria	c__Alphaproteobacteria	o__Rhodobacterales	f__Rhodobacteraceae	g__Cognatishimia	s__	95.94	0.7	3.28745	57
SE6808.metabat2_refined.046	d__Bacteria	p__Proteobacteria	c__Alphaproteobacteria	o__Rhodobacterales	f__Rhodobacteraceae	g__Jannaschia	s__	89.55	1.16	3.52047	64.1
SE6808.metabat2_refined.066	d__Bacteria	p__Proteobacteria	c__Alphaproteobacteria	o__Rickettsiales	f__UBA3002	g__UBA3002	s__	97.8	1.1	1.97746	53.4
SE6808.metabat2_refined.095_sub	d__Bacteria	p__Proteobacteria	c__Gammaproteobacteria	o__Legionellales	f__Legionellaceae	g__	s__	60.47	1.5	1.11651	46.2
SE6808.metabat_sens.008_sub	d__Bacteria	p__Proteobacteria	c__Gammaproteobacteria	o__Pseudomonadales	f__Nitrincolaceae	g__Neptuniibacter	s__	70.8	0	3.41725	45
SE6808.metabat_sens.022_sub	d__Bacteria	p__Proteobacteria	c__Gammaproteobacteria	o__Pseudomonadales	f__Cellvibrionaceae	g__	s__	99.78	0.57	4.46582	42.7
SE6808.metabat_sspec.013_sub	d__Bacteria	p__Proteobacteria	c__Alphaproteobacteria	o__Rhizobiales	f__JACESI01	g__JACESI01	s__	100	0.7	3.07843	42.4
SE6808.rosella_refined.021	d__Bacteria	p__Chlamydiota	c__Chlamydiia	o__Chlamydiales	f__JAAKFR01	g__	s__	83.36	0.68	1.36141	46.5
SE6808.semibin_refined.027	d__Bacteria	p__Planctomycetota	c__Phycisphaerae	o__Phycisphaerales	f__UBA1924	g__	s__	97.73	2.34	3.67009	65.8
SE6808.semibin_refined.097	d__Bacteria	p__Proteobacteria	c__Gammaproteobacteria	o__Legionellales	f__Legionellaceae	g__	s__	91.98	2.12	1.78508	46.6
SE6808.vamb.001	d__Bacteria	p__Proteobacteria	c__Alphaproteobacteria	o__Micavibrionales	f__Micavibrionaceae	g__GCA-2708415	s__	94.66	0.23	1.77542	43.5
SE6808.vamb.016	d__Bacteria	p__Eremiobacterota	c__Xenobia	o__Xenobiales	f__JADMJV01	g__	s__	89.25	5.66	6.97922	55.8
SE6810.metabat2_refined.032	d__Bacteria	p__Myxococcota	c__Bradymonadia	o__UBA7976	f__UBA1532	g__	s__	70.99	3.55	7.12908	69.5
SE6810.semibin_refined.029	d__Bacteria	p__Proteobacteria	c__Gammaproteobacteria	o__Granulosicoccales	f__Granulosicoccaceae	g__UBA7957	s__	90.55	4.72	4.57766	50.9
SE6810.vamb.009	d__Bacteria	p__Proteobacteria	c__Alphaproteobacteria	o__Rhizobiales	f__MH13	g__MH13	s__	97.12	0.4	4.11209	56.3
SE6811.concoct.062	d__Bacteria	p__Proteobacteria	c__Gammaproteobacteria	o__Pseudomonadales	f__DSM-6294	g__Oleibacter	s__	85.26	2.33	3.20633	51.5
SE6811.concoct.153_sub	d__Bacteria	p__Proteobacteria	c__Alphaproteobacteria	o__UBA2562	f__UBA2562	g__	s__	63.85	1.3	2.34202	67.7
SE6811.concoct.161	d__Bacteria	p__Proteobacteria	c__Alphaproteobacteria	o__Caulobacterales	f__Hyphomonadaceae	g__Henriciella	s__	69.31	0.86	3.65945	55.5
SE6811.metabat2_refined.051	d__Bacteria	p__Bacteroidota	c__Bacteroidia	o__Flavobacteriales	f__Schleiferiaceae	g__Croceimicrobium	s__	97.72	0.54	3.61643	42.2
SE6811.metabat2_refined.052_sub	d__Bacteria	p__Proteobacteria	c__Gammaproteobacteria	o__Pseudomonadales	f__HTCC2089	g__UBA4421	s__	52.6	2.22	2.22915	52.6
SE6811.metabat_sens.020_sub	d__Bacteria	p__Bacteroidota	c__Bacteroidia	o__Cytophagales	f__	g__	s__	57.07	0.55	0.73468	41.1
SE6811.metabat_sens.022_sub	d__Bacteria	p__Proteobacteria	c__Alphaproteobacteria	o__Rhodobacterales	f__Rhodobacteraceae	g__Epibacterium	s__Epibacterium litoralis	99.72	2.6	4.41946	57.3
SE6811.metabat_sens.037_sub	d__Bacteria	p__Proteobacteria	c__Alphaproteobacteria	o__Caulobacterales	f__Hyphomonadaceae	g__Henriciella	s__	96.79	0.82	3.94622	57.5
SE6811.metabat_sspec.034	d__Bacteria	p__Proteobacteria	c__Alphaproteobacteria	o__Caulobacterales	f__Parvularculaceae	g__	s__	97.9	0.78	3.83173	56.8
SE6811.rosella_refine.46_0	d__Bacteria	p__Bacteroidota	c__Bacteroidia	o__Cytophagales	f__Cyclobacteriaceae	g__Ekhidna	s__	61.77	5.21	2.66797	45.4
SE6811.rosella_refined.003	d__Bacteria	p__Proteobacteria	c__Alphaproteobacteria	o__Rhodobacterales	f__Rhodobacteraceae	g__Sulfitobacter	s__	92.16	1.9	3.96773	62.6
SE6811.rosella_refined.098	d__Bacteria	p__Proteobacteria	c__Alphaproteobacteria	o__Rickettsiales	f__UBA3002	g__	s__	97.85	0	1.90441	50
SE6811.rosella_refined.099	d__Bacteria	p__Proteobacteria	c__Alphaproteobacteria	o__Micavibrionales	f__Micavibrionaceae	g__TMED27	s__	74.33	1.1	1.84034	49.1
SE6811.semibin_refined.036	d__Bacteria	p__Myxococcota_A	c__UBA796	o__UBA796	f__GCA-2862545	g__	s__	91.16	3.39	8.7635	70.6
SE6811.semibin_refined.059	d__Bacteria	p__Proteobacteria	c__Alphaproteobacteria	o__Caulobacterales	f__Parvularculaceae	g__Parvularcula	s__	89.94	1.46	3.08729	59.4
SE6811.semibin_refined.071	d__Bacteria	p__Planctomycetota	c__Phycisphaerae	o__Phycisphaerales	f__UBA1924	g__	s__	95.45	0.07	3.53863	68.6
SE6811.semibin_refined.097_sub	d__Bacteria	p__Proteobacteria	c__Alphaproteobacteria	o__Micavibrionales	f__Micavibrionaceae	g__UBA2638	s__	75.01	3.72	2.15895	41
SE6811.semibin_refined.115	d__Bacteria	p__Patescibacteria	c__Gracilibacteria	o__UBA4473	f__UBA4473	g__	s__	76.92	0.85	1.31495	42.4
SE6811.semibin_refined.121	d__Bacteria	p__Patescibacteria	c__Paceibacteria	o__UBA9983_A	f__UBA2103	g__UBA2103	s__	61.51	1.71	0.621165	44.5
SE6813.concoct.113	d__Bacteria	p__Verrucomicrobiota	c__Verrucomicrobiae	o__Opitutales	f__CG1-02-43-26	g__	s__	70.58	0	1.4077	49
SE6816.concoct.008	d__Bacteria	p__Proteobacteria	c__Alphaproteobacteria	o__Rhodobacterales	f__Rhodobacteraceae	g__Jannaschia	s__	95.91	0.15	3.81071	64.2
SE6816.concoct.010	d__Bacteria	p__Proteobacteria	c__Alphaproteobacteria	o__Micavibrionales	f__Micavibrionaceae	g__UBA6147	s__	94.07	1.96	2.38703	45
SE6816.concoct.017	d__Bacteria	p__Proteobacteria	c__Alphaproteobacteria	o__Micavibrionales	f__Micavibrionaceae	g__UBA1664	s__	68.02	1.54	1.30576	44
SE6816.concoct.043	d__Bacteria	p__Proteobacteria	c__Gammaproteobacteria	o__Pseudomonadales	f__Cellvibrionaceae	g__	s__	53.13	1.39	2.35255	43.8
SE6816.concoct.072	d__Bacteria	p__Proteobacteria	c__Alphaproteobacteria	o__Micavibrionales	f__Micavibrionaceae	g__UBA2638	s__	68.3	2.41	1.643	46.4
SE6816.concoct.074_sub	d__Bacteria	p__Proteobacteria	c__Alphaproteobacteria	o__Micavibrionales	f__Micavibrionaceae	g__	s__	54	5.55	1.98553	43.7
SE6816.concoct.082_sub	d__Bacteria	p__Eremiobacterota	c__Xenobia	o__Xenobiales	f__JADMJV01	g__	s__	74.06	3.09	6.51741	55.9
SE6816.concoct.104_sub	d__Bacteria	p__Bacteroidota	c__Bacteroidia	o__Cytophagales	f__Cyclobacteriaceae	g__Ekhidna	s__	52.85	2.51	2.46102	45.3
SE6816.concoct.112_sub	d__Bacteria	p__Proteobacteria	c__Alphaproteobacteria	o__Rhizobiales	f__Hyphomicrobiaceae	g__GCA-2689605	s__	55.23	4.68	3.85659	53.4
SE6816.concoct.114_sub	d__Bacteria	p__Proteobacteria	c__Alphaproteobacteria	o__Rhodobacterales	f__Rhodobacteraceae	g__Pseudoprimorskyibacter	s__	61.04	2.76	3.80489	61.5
SE6816.concoct.117	d__Bacteria	p__Proteobacteria	c__Gammaproteobacteria	o__Francisellales	f__	g__	s__	98.85	0.9	2.29887	37.8
SE6816.concoct.128	d__Bacteria	p__Proteobacteria	c__Alphaproteobacteria	o__Micavibrionales	f__Micavibrionaceae	g__TMED27	s__	94.79	1.12	2.15199	46.5
SE6816.concoct.146	d__Bacteria	p__Acidobacteriota	c__Thermoanaerobaculia	o__UBA5704	f__QQVD01	g__QQVD01	s__	95.73	1.76	8.38249	65.8
SE6816.concoct.167	d__Bacteria	p__Proteobacteria	c__Alphaproteobacteria	o__Micavibrionales	f__Micavibrionaceae	g__UBA1664	s__	85.37	1.3	1.74388	42.2
SE6816.concoct.186	d__Bacteria	p__Proteobacteria	c__Alphaproteobacteria	o__Rhodobacterales	f__Rhodobacteraceae	g__Epibacterium	s__Epibacterium mobile	83.88	1.4	4.0327	59.1
SE6816.concoct.189_sub	d__Bacteria	p__Patescibacteria	c__Gracilibacteria	o__UBA4473	f__UBA4473	g__	s__	71.27	0.85	1.26392	42.4
SE6816.concoct.211	d__Bacteria	p__Proteobacteria	c__Alphaproteobacteria	o__Rhizobiales	f__MH13	g__MH13	s__	96.41	2.36	3.99698	55.8
SE6816.concoct.246_sub	d__Bacteria	p__Eremiobacterota	c__Xenobia	o__Xenobiales	f__JADMJV01	g__	s__	52.61	1.01	4.70268	52
SE6816.maxbin.027_sub	d__Bacteria	p__Proteobacteria	c__Alphaproteobacteria	o__Sphingomonadales	f__Sphingomonadaceae	g__Erythrobacter	s__	89.66	6.9	4.08211	58.8
SE6816.maxbin.089_sub	d__Bacteria	p__Planctomycetota	c__Planctomycetia	o__Pirellulales	f__Pirellulaceae	g__JABAAE01	s__	57	9.22	4.95047	47.5
SE6816.maxbin.098	d__Bacteria	p__Proteobacteria	c__Alphaproteobacteria	o__Micavibrionales	f__Micavibrionaceae	g__	s__	85.37	1.09	1.74549	43.3
SE6816.maxbin.110_sub	d__Bacteria	p__Acidobacteriota	c__Thermoanaerobaculia	o__UBA5704	f__UBA5704	g__	s__	54.35	1.67	5.51758	63.2
SE6816.maxbin.125	d__Bacteria	p__Proteobacteria	c__Alphaproteobacteria	o__Rhizobiales	f__Devosiaceae	g__	s__	96.7	1.03	2.93314	50.1
SE6816.metabat2_refined.008_sub	d__Bacteria	p__Proteobacteria	c__Alphaproteobacteria	o__Rhodobacterales	f__Rhodobacteraceae	g__Sulfitobacter	s__	86.02	4.74	4.69306	56.3
SE6816.metabat2_refined.012	d__Bacteria	p__Proteobacteria	c__Alphaproteobacteria	o__Rhizobiales	f__HXMU1428-3	g__HXMU1428-3	s__	96.02	3.85	4.60939	47.5
SE6816.metabat2_refined.013_sub	d__Bacteria	p__Bdellovibrionota	c__Bdellovibrionia	o__Bdellovibrionales	f__	g__	s__	75.87	1.25	2.43396	36.8
SE6816.metabat2_refined.040	d__Bacteria	p__Proteobacteria	c__Alphaproteobacteria	o__Rhizobiales	f__HXMU1428-3	g__HXMU1428-3	s__	97.93	2.34	3.91041	42.3
SE6816.metabat2_refined.061	d__Bacteria	p__Proteobacteria	c__Alphaproteobacteria	o__Rickettsiales	f__UBA3002	g__UBA3002	s__	97.8	0	2.04605	52
SE6816.metabat2_refined.065	d__Bacteria	p__Acidobacteriota	c__Thermoanaerobaculia	o__UBA5704	f__UBA5704	g__	s__	93.54	2.56	9.73646	62.5
SE6816.metabat2_refined.067_sub	d__Bacteria	p__Proteobacteria	c__Alphaproteobacteria	o__Rhodobacterales	f__Rhodobacteraceae	g__Dinoroseobacter	s__	91.6	5.83	5.32215	60.4
SE6816.metabat2_refined.118	d__Bacteria	p__Bacteroidota	c__Bacteroidia	o__Chitinophagales	f__Saprospiraceae	g__	s__	99.01	0	4.32465	35.4
SE6816.metabat2_refined.121	d__Bacteria	p__Proteobacteria	c__Alphaproteobacteria	o__Rhodobacterales	f__Rhodobacteraceae	g__Roseovarius	s__	97.5	4.87	4.23235	60.4
SE6816.metabat2_refined.139_sub	d__Bacteria	p__Proteobacteria	c__Alphaproteobacteria	o__Rickettsiales	f__UBA3002	g__UBA3002	s__	89.13	0	2.08264	50.8
SE6816.metabat2_refined.140_sub	d__Bacteria	p__Proteobacteria	c__Alphaproteobacteria	o__Rhodobacterales	f__Rhodobacteraceae	g__HKCCE3408	s__	80.06	1.37	3.67648	61.2
SE6816.metabat2_refined.153	d__Bacteria	p__Bacteroidota	c__Bacteroidia	o__J057	f__J057	g__	s__	90.87	0.6	7.45554	48.8
SE6816.metabat2_refined.163_sub	d__Bacteria	p__Proteobacteria	c__Alphaproteobacteria	o__Rhizobiales	f__Stappiaceae	g__Roseibium	s__Roseibium sp001890945	99.34	1.21	5.34372	56.5
SE6816.metabat_sens.027_sub	d__Bacteria	p__Proteobacteria	c__Alphaproteobacteria	o__Rhodobacterales	f__Rhodobacteraceae	g__Epibacterium	s__	96.69	2.34	4.23163	56.3
SE6816.rosella_refined.001	d__Bacteria	p__Planctomycetota	c__Planctomycetia	o__Pirellulales	f__Lacipirellulaceae	g__	s__	97.63	0	4.73697	64.2
SE6816.rosella_refined.010	d__Bacteria	p__Planctomycetota	c__Planctomycetia	o__Pirellulales	f__Lacipirellulaceae	g__Botrimarina	s__	81.69	0.57	4.61977	66.7
SE6816.rosella_refined.015	d__Bacteria	p__Proteobacteria	c__Alphaproteobacteria	o__Caulobacterales	f__Maricaulaceae	g__Oceanicaulis	s__Oceanicaulis sp003046365	99.73	1.05	3.06742	61.6
SE6816.rosella_refined.018	d__Bacteria	p__Proteobacteria	c__Alphaproteobacteria	o__Rickettsiales	f__UBA3002	g__UBA3002	s__	97.8	0	2.06606	51.1
SE6816.rosella_refined.022	d__Bacteria	p__Eremiobacterota	c__Xenobia	o__Xenobiales	f__JADMJV01	g__	s__	90.74	5.4	9.19021	53.4
SE6816.rosella_refined.033	d__Bacteria	p__Proteobacteria	c__Alphaproteobacteria	o__Rhodobacterales	f__Rhodobacteraceae	g__Thalassobius	s__	98.05	0	3.38622	61
SE6816.rosella_refined.039	d__Bacteria	p__Proteobacteria	c__Alphaproteobacteria	o__Rhodobacterales	f__Rhodobacteraceae	g__Ponticoccus	s__	92.86	1.08	5.48881	59.9
SE6816.rosella_refined.045	d__Bacteria	p__Proteobacteria	c__Alphaproteobacteria	o__Rhodobacterales	f__Rhodobacteraceae	g__Aestuariivita	s__	99.57	0	3.62142	59.5
SE6816.rosella_refined.087	d__Bacteria	p__Bacteroidota	c__Bacteroidia	o__Cytophagales	f__	g__	s__	57.72	0	0.641479	36.9
SE6816.rosella_refined.156	d__Bacteria	p__Firmicutes_A	c__Clostridia	o__Peptostreptococcales	f__Acidaminobacteraceae	g__JABXKX01	s__	80.97	3.55	4.41902	35.7
SE6816.semibin_refined.030	d__Bacteria	p__Proteobacteria	c__Alphaproteobacteria	o__Sphingomonadales	f__Sphingomonadaceae	g__Parasphingorhabdus	s__	52.49	0.6	1.8255	51.4
SE6816.semibin_refined.045	d__Bacteria	p__Proteobacteria	c__Gammaproteobacteria	o__Pseudomonadales	f__Cellvibrionaceae	g__Endobugula	s__	99.57	0.43	3.53178	45.4
SE6816.semibin_refined.111	d__Bacteria	p__Planctomycetota	c__Planctomycetia	o__Pirellulales	f__Lacipirellulaceae	g__Botrimarina	s__	92.48	2.3	5.12453	66.1
SE6816.semibin_refined.119_sub	d__Bacteria	p__Proteobacteria	c__Alphaproteobacteria	o__Rhodobacterales	f__Rhodobacteraceae	g__Actibacterium	s__Actibacterium atlanticum	92.06	1.26	2.88213	59.2
SE6816.semibin_refined.128	d__Bacteria	p__Proteobacteria	c__Alphaproteobacteria	o__Rhodobacterales	f__Rhodobacteraceae	g__Tateyamaria	s__	88.54	1.27	3.96785	60.8
SE6816.semibin_refined.134	d__Bacteria	p__Bdellovibrionota_C	c__UBA2361	o__UBA2361	f__RFPC01	g__	s__	83.31	3.78	3.4265	45.9
SE6816.semibin_refined.136	d__Bacteria	p__Proteobacteria	c__Alphaproteobacteria	o__Rhizobiales	f__Rhizobiaceae	g__JAALLB01	s__	95.22	0.62	3.87918	50.5
SE6816.semibin_refined.150	d__Bacteria	p__Proteobacteria	c__Alphaproteobacteria	o__Micavibrionales	f__Micavibrionaceae	g__	s__	84.48	1.01	1.69952	50.9
SE6816.semibin_refined.173	d__Bacteria	p__Proteobacteria	c__Alphaproteobacteria	o__Rhizobiales	f__Rhizobiaceae	g__Lentilitoribacter	s__	97.31	0.59	3.52388	44.3
SE6816.semibin_refined.189	d__Bacteria	p__Proteobacteria	c__Alphaproteobacteria	o__Rickettsiales	f__UBA3002	g__	s__	80.11	0	1.73193	46.8
SE6816.semibin_refined.202	d__Bacteria	p__Proteobacteria	c__Alphaproteobacteria	o__Rhizobiales	f__Stappiaceae	g__Roseibium	s__	99.24	0.79	4.6275	55.5
SE6816.vamb.048	d__Bacteria	p__Planctomycetota	c__Planctomycetia	o__Planctomycetales	f__Planctomycetaceae	g__	s__	79.34	1.11	4.22635	49.9
SE6816.vamb.052	d__Bacteria	p__Acidobacteriota	c__Thermoanaerobaculia	o__UBA5704	f__UBA5704	g__	s__	52.09	2.19	7.22693	60.6
SE6816.vamb.054	d__Bacteria	p__Proteobacteria	c__Alphaproteobacteria	o__Parvibaculales	f__CGMCC-115125	g__Pyruvatibacter	s__	93.55	0.87	3.38764	59.9
SE6816.vamb.084	d__Bacteria	p__Proteobacteria	c__Alphaproteobacteria	o__Rickettsiales	f__UBA3002	g__	s__	97.25	0	1.81034	48
SE6816.vamb.085	d__Bacteria	p__Planctomycetota	c__Planctomycetia	o__Pirellulales	f__Lacipirellulaceae	g__	s__	97.7	0	3.57348	48.4
SE6828.concoct.024_sub	d__Bacteria	p__Proteobacteria	c__Gammaproteobacteria	o__Enterobacterales	f__Alteromonadaceae	g__Alteromonas	s__Alteromonas aggregata	95.51	0.98	4.47226	48.9
SE6828.concoct.048_sub	d__Bacteria	p__Proteobacteria	c__Alphaproteobacteria	o__Rhodobacterales	f__Rhodobacteraceae	g__Leisingera	s__	51.44	0.86	3.31881	63.9
SE6828.concoct.109_sub	d__Bacteria	p__Proteobacteria	c__Alphaproteobacteria	o__Micavibrionales	f__Micavibrionaceae	g__TMED27	s__	61.9	2.35	1.63068	46
SE6828.concoct.158	d__Bacteria	p__Proteobacteria	c__Alphaproteobacteria	o__Rickettsiales	f__UBA3002	g__	s__	57.43	0	1.04047	45.5
SE6828.rosella_refined.048	d__Bacteria	p__Planctomycetota	c__Phycisphaerae	o__Phycisphaerales	f__UBA1924	g__UBA1924	s__	96.52	0	2.64781	66.4
SE6828.vamb.005	d__Bacteria	p__Bdellovibrionota	c__Bacteriovoracia	o__Bacteriovoracales	f__Bacteriovoracaceae	g__GCA-2712005	s__	93.36	2.23	4.21775	39.3
SE6829.rosella_refined.012	d__Bacteria	p__Proteobacteria	c__Gammaproteobacteria	o__SZUA-146	f__SZUA-146	g__	s__	91.49	3.7	6.4464	65.9
SE6833.concoct.002	d__Bacteria	p__Actinobacteriota	c__Acidimicrobiia	o__Acidimicrobiales	f__Ilumatobacteraceae	g__Ilumatobacter_A	s__	99.15	2.23	4.16556	69.8
SE6833.concoct.115	d__Bacteria	p__Planctomycetota	c__Planctomycetia	o__Pirellulales	f__Pirellulaceae	g__Rubripirellula	s__	81.24	1.76	7.83483	59.8
SE6833.maxbin.035_sub	d__Bacteria	p__Patescibacteria	c__Paceibacteria	o__UBA9983_A	f__UBA2103	g__UBA2103	s__	53.63	5.17	1.07265	47.3
SE6833.metabat2_refined.003_sub	d__Bacteria	p__Proteobacteria	c__Alphaproteobacteria	o__Rhodobacterales	f__Rhodobacteraceae	g__Roseicyclus	s__	89	4.42	4.54544	59.4
SE6833.metabat2_refined.034_sub	d__Bacteria	p__Proteobacteria	c__Alphaproteobacteria	o__Rhodobacterales	f__Rhodobacteraceae	g__Actibacterium	s__	50.86	0	2.25813	61.9
SE6833.metabat2_refined.065	d__Bacteria	p__Actinobacteriota	c__Acidimicrobiia	o__Acidimicrobiales	f__Ilumatobacteraceae	g__Ilumatobacter_A	s__	91.49	2.64	3.87235	69
SE6833.rosella_refine.71_0	d__Bacteria	p__Proteobacteria	c__Alphaproteobacteria	o__Rhizobiales	f__Stappiaceae	g__Roseibium	s__	55.72	3.31	3.52612	59.2
SE6833.rosella_refined.083	d__Bacteria	p__Proteobacteria	c__Alphaproteobacteria	o__Rhodobacterales	f__Rhodobacteraceae	g__Roseicyclus	s__	93.78	1.94	3.74589	61.9
SE6833.semibin_refined.059	d__Bacteria	p__Proteobacteria	c__Alphaproteobacteria	o__Rhodobacterales	f__Rhodobacteraceae	g__	s__	98.98	0.6	4.4369	61.5
SE6833.semibin_refined.082	d__Bacteria	p__Proteobacteria	c__Gammaproteobacteria	o__Granulosicoccales	f__Granulosicoccaceae	g__UBA7957	s__	97.26	4.12	4.9198	55.2
SE6833.semibin_refined.093	d__Bacteria	p__Proteobacteria	c__Alphaproteobacteria	o__Rhizobiales	f__Devosiaceae	g__	s__	96.13	0.16	2.80783	50.1
SE6833.vamb.037	d__Bacteria	p__Myxococcota	c__Polyangia	o__Nannocystales	f__Nannocystaceae	g__	s__	95.32	5.9	13.8505	69.4
SE6836.concoct.067_sub	d__Bacteria	p__Proteobacteria	c__Alphaproteobacteria	o__Rhodobacterales	f__Rhodobacteraceae	g__Pseudooceanicola	s__Pseudooceanicola nitratireducens	72.59	2.16	2.93836	64.9
SE6836.maxbin.015_sub	d__Bacteria	p__Proteobacteria	c__Alphaproteobacteria	o__Rhodobacterales	f__Rhodobacteraceae	g__Cognatishimia	s__	97.57	1	3.50882	54.5
SE6836.metabat2_refined.012_sub	d__Bacteria	p__Proteobacteria	c__Alphaproteobacteria	o__Rhizobiales	f__Rhizobiaceae	g__Ahrensia	s__	97.66	0.06	3.38209	49.5
SE6836.metabat2_refined.028	d__Bacteria	p__Proteobacteria	c__Alphaproteobacteria	o__Rhizobiales	f__Rhizobiaceae	g__JAALLB01	s__	95.75	2.02	3.30126	49.8
SE6836.metabat2_refined.037_sub	d__Bacteria	p__Proteobacteria	c__Alphaproteobacteria	o__Rhodobacterales	f__Rhodobacteraceae	g__Dinoroseobacter	s__	53.32	2.56	2.77276	64.1
SE6836.metabat2_refined.044_sub	d__Bacteria	p__Proteobacteria	c__Alphaproteobacteria	o__Rhizobiales	f__MH13	g__MH13	s__	84.45	9.57	4.16125	61.4
SE6836.metabat_sens.015_sub	d__Bacteria	p__Proteobacteria	c__Alphaproteobacteria	o__Rhodobacterales	f__Rhodobacteraceae	g__Epibacterium	s__	80.33	1.64	3.5664	58.5
SE6836.semibin_refined.016_sub	d__Bacteria	p__Proteobacteria	c__Alphaproteobacteria	o__Sphingomonadales	f__Sphingomonadaceae	g__Parasphingorhabdus	s__	60.71	1.44	2.2199	51.4
SE6838.concoct.028_sub	d__Bacteria	p__Proteobacteria	c__Alphaproteobacteria	o__Rhodobacterales	f__Rhodobacteraceae	g__Shimia	s__Shimia sp017743735	66.43	1.39	2.9397	59
SE6838.concoct.105_sub	d__Bacteria	p__Proteobacteria	c__Gammaproteobacteria	o__Pseudomonadales	f__Nitrincolaceae	g__Neptuniibacter	s__	98.41	1.52	3.55591	45.1
SE6838.concoct.114_sub	d__Bacteria	p__Proteobacteria	c__Alphaproteobacteria	o__Rhodobacterales	f__Rhodobacteraceae	g__Fluviibacterium	s__	54.11	0.95	3.10287	61.4
SE6838.metabat2_refined.058_sub	d__Bacteria	p__Proteobacteria	c__Gammaproteobacteria	o__Enterobacterales	f__Alteromonadaceae	g__WKFJ01	s__	94.16	3.9	6.84183	45.2
SE6838.rosella_refined.045	d__Bacteria	p__Proteobacteria	c__Alphaproteobacteria	o__Rhodobacterales	f__Rhodobacteraceae	g__Mangrovicoccus	s__	95.52	1.06	3.70803	62.1
SE6838.rosella_refined.054	d__Bacteria	p__Proteobacteria	c__Alphaproteobacteria	o__Rhodobacterales	f__Rhodobacteraceae	g__Mangrovicoccus	s__	97.55	0.52	3.05782	60.8
SE6838.semibin_refined.019	d__Bacteria	p__Acidobacteriota	c__Thermoanaerobaculia	o__UBA5704	f__UBA5704	g__	s__	98.24	2.62	9.66582	62.1
SE6838.vamb.013_sub	d__Bacteria	p__Proteobacteria	c__Gammaproteobacteria	o__Pseudomonadales	f__Nitrincolaceae	g__Neptuniibacter	s__	93.76	0.87	2.68601	45.7
SE6842.concoct.036	d__Bacteria	p__Proteobacteria	c__Alphaproteobacteria	o__Sphingomonadales	f__Sphingomonadaceae	g__Erythrobacter	s__	90.01	1.46	3.2307	59.6
SE6842.concoct.043_sub	d__Bacteria	p__Proteobacteria	c__Alphaproteobacteria	o__Rhodobacterales	f__Rhodobacteraceae	g__Dinoroseobacter	s__	90.26	3	4.39627	64.2
SE6842.concoct.112	d__Bacteria	p__Planctomycetota	c__UBA1135	o__UBA1135	f__GCA-002686595	g__	s__	84.56	3.51	5.6607	70.5
SE6842.rosella_refined.044	d__Bacteria	p__Proteobacteria	c__Gammaproteobacteria	o__Pseudomonadales	f__IMCC2047	g__IMCC2047	s__	92.45	2.45	3.38517	52.9
SE6842.semibin_refined.036	d__Bacteria	p__Proteobacteria	c__Alphaproteobacteria	o__Rhodobacterales	f__Rhodobacteraceae	g__Cognatishimia	s__	65.44	0	2.67969	55.6
SE6842.vamb.007	d__Bacteria	p__Proteobacteria	c__Alphaproteobacteria	o__Caulobacterales	f__Hyphomonadaceae	g__Hyphomonas	s__Hyphomonas sp017792385	98.73	0.35	3.35062	62
SE6844.concoct.090_sub	d__Bacteria	p__Bacteroidota	c__Bacteroidia	o__Chitinophagales	f__Saprospiraceae	g__CAJQQY01	s__	78.48	2.47	7.87161	35.8
SE6844.metabat2_refined.023	d__Bacteria	p__Bacteroidota	c__Bacteroidia	o__Chitinophagales	f__Saprospiraceae	g__RFSX01	s__	90.35	2.33	4.30097	35.6
SE6850.metabat2_refined.001	d__Bacteria	p__Proteobacteria	c__Alphaproteobacteria	o__Rhizobiales	f__OSC116	g__	s__	95.53	2.24	1.91228	49.7
SE6850.metabat2_refined.020	d__Bacteria	p__Proteobacteria	c__Alphaproteobacteria	o__Rhodospirillales	f__JAHDSF01	g__	s__	99.72	1.87	4.52801	61.7
SE6850.metabat_sspec.025	d__Bacteria	p__Proteobacteria	c__Alphaproteobacteria	o__Rhodobacterales	f__Rhodobacteraceae	g__Rhodophyticola	s__Rhodophyticola sp007827395	99.79	0.76	3.59056	60.7
SE6850.vamb.017	d__Bacteria	p__Proteobacteria	c__Alphaproteobacteria	o__Rhizobiales	f__Rhizobiaceae	g__Roseitalea	s__	67.56	0.97	2.59654	63.4
SE6851.concoct.073	d__Bacteria	p__Proteobacteria	c__Gammaproteobacteria	o__Pseudomonadales	f__Nitrincolaceae	g__Neptuniibacter	s__	67.43	2.8	1.86629	47
SE6851.metabat2_refined.035_sub	d__Bacteria	p__Proteobacteria	c__Alphaproteobacteria	o__Rhodobacterales	f__Rhodobacteraceae	g__Shimia	s__	71.75	4.85	3.44632	57.1
SE6851.metabat_spec.007	d__Bacteria	p__Proteobacteria	c__Gammaproteobacteria	o__UBA4486	f__UBA4486	g__SMWN01	s__	88.25	1.12	1.84255	42
SE6851.rosella_refined.013	d__Bacteria	p__Proteobacteria	c__Alphaproteobacteria	o__Rhodobacterales	f__Rhodobacteraceae	g__Aestuariivita	s__	98	2.34	4.1624	60.3
SE6853.concoct.035	d__Bacteria	p__Proteobacteria	c__Alphaproteobacteria	o__Sphingomonadales	f__Sphingomonadaceae	g__Parasphingorhabdus	s__	77.29	0.99	2.91482	50.6
SE6853.concoct.043_sub	d__Bacteria	p__Proteobacteria	c__Alphaproteobacteria	o__Rhodobacterales	f__Rhodobacteraceae	g__JABDJO01	s__	55.16	8.3	2.52527	62.1
SE6853.concoct.066	d__Bacteria	p__Proteobacteria	c__Alphaproteobacteria	o__Rhizobiales	f__OSC116	g__	s__	99.78	0.43	2.04251	44.7
SE6853.concoct.076_sub	d__Bacteria	p__Krumholzibacteriota	c__Krumholzibacteria	o__	f__	g__	s__	74.67	0	3.61459	64.8
SE6853.concoct.080	d__Bacteria	p__Proteobacteria	c__Alphaproteobacteria	o__Rhizobiales	f__Devosiaceae	g__S141-66	s__	68.18	1.65	2.41194	52.5
SE6853.maxbin.019	d__Bacteria	p__Planctomycetota	c__Planctomycetia	o__Pirellulales	f__Pirellulaceae	g__Rubripirellula	s__	86.22	4.81	8.59229	59.5
SE6853.metabat2_refined.025	d__Bacteria	p__Myxococcota_A	c__UBA9160	o__UBA9160	f__UBA4427	g__UBA4427	s__	73.91	3.12	4.13701	64.3
SE6853.semibin_refined.036_sub	d__Bacteria	p__Proteobacteria	c__Alphaproteobacteria	o__Rhizobiales	f__OSC116	g__	s__	98.91	0	2.15897	47.3
SE6856.concoct.124	d__Bacteria	p__Proteobacteria	c__Alphaproteobacteria	o__Caulobacterales	f__Parvularculaceae	g__Marinicaulis	s__	63.77	2.13	2.12698	59
SE6856.maxbin.011	d__Bacteria	p__Proteobacteria	c__Alphaproteobacteria	o__Rhizobiales	f__OSC116	g__	s__	99.33	0.58	1.98029	44.5
SE6856.metabat2_refined.039	d__Bacteria	p__Proteobacteria	c__Alphaproteobacteria	o__Caulobacterales	f__Hyphomonadaceae	g__	s__	98.7	0.32	2.95818	59.3
SE6856.metabat2_refined.061	d__Bacteria	p__Proteobacteria	c__Alphaproteobacteria	o__Rhodobacterales	f__Rhodobacteraceae	g__Mangrovicoccus	s__	96.55	1.87	5.11374	63.7
SE6856.metabat_sens.035	d__Bacteria	p__Proteobacteria	c__Alphaproteobacteria	o__Rhodobacterales	f__Rhodobacteraceae	g__Rhodophyticola	s__	98.63	0.48	3.58482	63
SE6856.metabat_spec.003	d__Bacteria	p__Proteobacteria	c__Alphaproteobacteria	o__Rhodobacterales	f__Rhodobacteraceae	g__Nioella	s__	85.29	4.15	3.43635	59.5
SE6856.semibin_refined.025	d__Bacteria	p__Proteobacteria	c__Gammaproteobacteria	o__Pseudomonadales	f__Nitrincolaceae	g__Neptuniibacter	s__Neptuniibacter caesariensis	96.09	1.37	3.76573	46.9
SE6856.semibin_refined.030	d__Bacteria	p__Proteobacteria	c__Alphaproteobacteria	o__Rhodobacterales	f__Rhodobacteraceae	g__	s__	93.57	1.99	5.00762	63.9
SE6856.vamb.009	d__Bacteria	p__Proteobacteria	c__Alphaproteobacteria	o__Rhizobiales	f__Methyloligellaceae	g__	s__	96.91	1.32	3.43249	58
SE6858.concoct.061	d__Bacteria	p__Proteobacteria	c__Alphaproteobacteria	o__Rhizobiales	f__OSC116	g__	s__	99.78	0.14	1.98751	46.5
SE6858.concoct.080	d__Bacteria	p__Proteobacteria	c__Alphaproteobacteria	o__Rhizobiales	f__OSC116	g__	s__	94.07	1.74	1.9044	45.3
SE6858.concoct.091_sub	d__Bacteria	p__Proteobacteria	c__Alphaproteobacteria	o__Rhodobacterales	f__Rhodobacteraceae	g__Roseicyclus	s__	89.52	1.7	3.72398	63.5
SE6858.maxbin.005	d__Bacteria	p__Proteobacteria	c__Gammaproteobacteria	o__Arenicellales	f__Arenicellaceae	g__	s__	98.78	0	4.70254	46.9
SE6858.maxbin.022	d__Bacteria	p__Proteobacteria	c__Alphaproteobacteria	o__Rhodobacterales	f__Rhodobacteraceae	g__Actibacterium	s__	98.99	2.03	3.90109	62.8
SE6858.metabat2_refined.029	d__Bacteria	p__Proteobacteria	c__Alphaproteobacteria	o__Rhodobacterales	f__Rhodobacteraceae	g__HXMU1420-2	s__	93.01	2.1	4.52436	64.3
SE6858.vamb.006	d__Bacteria	p__Chlamydiota	c__Chlamydiia	o__Chlamydiales	f__Rhabdochlamydiaceae	g__	s__	82.46	1.58	1.33206	44.7
SE6863.metabat2_refined.017_sub	d__Bacteria	p__Proteobacteria	c__Alphaproteobacteria	o__Rhodobacterales	f__Rhodobacteraceae	g__Roseicyclus	s__	77.42	1.41	3.05299	62.4
SE6863.metabat2_refined.033	d__Bacteria	p__Proteobacteria	c__Gammaproteobacteria	o__Pseudomonadales	f__Oleiphilaceae	g__Marinobacter	s__	100	0.07	4.29207	57
SE6863.metabat_sens.009	d__Bacteria	p__Proteobacteria	c__Alphaproteobacteria	o__Rhodobacterales	f__Rhodobacteraceae	g__Roseicyclus	s__	59.07	1.37	2.51111	61.3
SE6863.semibin_refined.004	d__Bacteria	p__Proteobacteria	c__Alphaproteobacteria	o__Rhodospirillales	f__Rhodospirillaceae	g__	s__	90.55	0.25	4.34711	59.3
SE6863.semibin_refined.017	d__Bacteria	p__Acidobacteriota	c__Thermoanaerobaculia	o__UBA5704	f__UBA5704	g__	s__	98.24	2.56	10.5158	66.5
SE6864.concoct.001	d__Bacteria	p__Proteobacteria	c__Alphaproteobacteria	o__Rhizobiales	f__Rhizobiaceae	g__Roseitalea	s__Roseitalea stylonematis	96.53	0.78	3.83845	64.6
SE6864.concoct.003_sub	d__Bacteria	p__Proteobacteria	c__Alphaproteobacteria	o__Rhodobacterales	f__Rhodobacteraceae	g__Sulfitobacter	s__	53.32	1.72	3.13265	60.1
SE6864.concoct.012	d__Bacteria	p__Planctomycetota	c__Phycisphaerae	o__Phycisphaerales	f__Phycisphaeraceae	g__	s__	60.89	0	2.75783	62.9
SE6864.concoct.031	d__Bacteria	p__Bdellovibrionota	c__Bacteriovoracia	o__Bacteriovoracales	f__Bacteriovoracaceae	g__	s__	93.68	1.79	3.64123	44
SE6864.concoct.033	d__Bacteria	p__Proteobacteria	c__Alphaproteobacteria	o__Minwuiales	f__Minwuiaceae	g__	s__	82.75	1.1	3.74622	58.9
SE6864.concoct.063	d__Bacteria	p__Acidobacteriota	c__Thermoanaerobaculia	o__UBA5704	f__UBA5704	g__	s__	84.57	1.71	10.5599	60.6
SE6864.concoct.088_sub	d__Bacteria	p__Planctomycetota	c__Phycisphaerae	o__Phycisphaerales	f__UBA1924	g__RECQ01	s__	68.33	2.58	2.21048	67.2
SE6864.concoct.107_sub	d__Bacteria	p__Proteobacteria	c__Gammaproteobacteria	o__Arenicellales	f__CAJQKF01	g__	s__	54.46	9.2	2.55335	54
SE6864.concoct.110	d__Bacteria	p__Proteobacteria	c__Alphaproteobacteria	o__Rhizobiales	f__Im1	g__CAJQND01	s__	73.45	2.19	4.15483	55.8
SE6864.concoct.131_sub	d__Bacteria	p__Proteobacteria	c__Alphaproteobacteria	o__Caulobacterales	f__Hyphomonadaceae	g__Henriciella	s__	66.04	8.29	2.36565	54.6
SE6864.concoct.139_sub	d__Bacteria	p__Acidobacteriota	c__Thermoanaerobaculia	o__UBA5704	f__QQVD01	g__	s__	55.92	1.28	3.47911	60.6
SE6864.concoct.214_sub	d__Bacteria	p__Proteobacteria	c__Alphaproteobacteria	o__Rhizobiales	f__MH13	g__MH13	s__	98.8	1	3.76192	57.3
SE6864.concoct.215	d__Bacteria	p__Proteobacteria	c__Alphaproteobacteria	o__Rhizobiales	f__OSC116	g__	s__	99.07	0.45	2.01455	47.5
SE6864.concoct.218_sub	d__Bacteria	p__Omnitrophota	c__Koll11	o__UBA10015	f__Kpj58rc	g__JAGOSC01	s__	59.02	3.29	2.04978	43.7
SE6864.concoct.221_sub	d__Bacteria	p__Proteobacteria	c__Alphaproteobacteria	o__Rhizobiales	f__HXMU1428-3	g__HXMU1428-3	s__	89	3.55	4.4869	49.2
SE6864.concoct.227	d__Bacteria	p__Proteobacteria	c__Gammaproteobacteria	o__QZLD01	f__	g__	s__	60.93	1.44	2.84127	58.8
SE6864.maxbin.048	d__Bacteria	p__Acidobacteriota	c__Thermoanaerobaculia	o__UBA5704	f__UBA5704	g__	s__	94.75	5.84	7.17476	59
SE6864.maxbin.052_sub	d__Bacteria	p__Desulfobacterota_D	c__UBA1144	o__UBA2774	f__UBA2774	g__CR02bin9	s__	92.34	7.99	2.35586	42.2
SE6864.maxbin.073_sub	d__Bacteria	p__Proteobacteria	c__Alphaproteobacteria	o__Rhodobacterales	f__Rhodobacteraceae	g__Cognatishimia	s__	94.52	3.75	3.8334	53.9
SE6864.maxbin.079_sub	d__Bacteria	p__Proteobacteria	c__Alphaproteobacteria	o__Rhizobiales	f__Rhizobiaceae	g__GCA-2401155	s__	95.62	3.21	4.46097	50.6
SE6864.maxbin.087	d__Bacteria	p__Proteobacteria	c__Alphaproteobacteria	o__Rhizobiales	f__MH13	g__MH13	s__	97.55	0.63	3.67357	60.1
SE6864.maxbin.096	d__Bacteria	p__Proteobacteria	c__Alphaproteobacteria	o__Rhizobiales	f__MH13	g__MH13	s__	95.78	1.45	4.19818	58.8
SE6864.metabat2_refined.063	d__Bacteria	p__Myxococcota	c__Polyangia	o__Polyangiales	f__SG8-38	g__GCA-2699025	s__	84.34	3.64	7.31367	61.7
SE6864.metabat2_refined.079_sub	d__Bacteria	p__Proteobacteria	c__Alphaproteobacteria	o__Rhizobiales	f__Rhizobiaceae	g__JAALLB01	s__	64.71	4.29	2.33113	54
SE6864.metabat2_refined.112	d__Bacteria	p__Proteobacteria	c__Alphaproteobacteria	o__Rhodobacterales	f__Rhodobacteraceae	g__Pseudooceanicola	s__	83.95	3.89	3.4586	62
SE6864.metabat2_refined.116	d__Bacteria	p__Desulfobacterota_B	c__Binatia	o__HRBIN30	f__CADEER01	g__CADEER01	s__	93.01	3.23	6.8683	63.4
SE6864.metabat2_refined.122	d__Bacteria	p__Proteobacteria	c__Gammaproteobacteria	o__	f__	g__	s__	97.43	2.08	4.59645	57.4
SE6864.metabat2_refined.202_sub	d__Bacteria	p__Proteobacteria	c__Alphaproteobacteria	o__Rhizobiales	f__HXMU1428-3	g__HXMU1428-3	s__	96.91	2.38	4.30214	39.4
SE6864.metabat_sens.006_sub	d__Bacteria	p__Proteobacteria	c__Alphaproteobacteria	o__Rhizobiales	f__Aestuariivirgaceae	g__Anderseniella	s__	80.9	2.23	3.77159	60.1
SE6864.rosella_refine.43_0	d__Bacteria	p__Proteobacteria	c__Alphaproteobacteria	o__Caulobacterales	f__Hyphomonadaceae	g__Henriciella	s__	51.97	2.24	1.71414	60
SE6864.rosella_refined.005	d__Bacteria	p__Proteobacteria	c__Alphaproteobacteria	o__Rhizobiales	f__HXMU1428-3	g__HXMU1428-3	s__	97.71	2.04	3.92271	39.9
SE6864.rosella_refined.015	d__Bacteria	p__Patescibacteria	c__Gracilibacteria	o__	f__	g__	s__	74.75	0	1.14434	44.5
SE6864.rosella_refined.055_sub	d__Bacteria	p__Desulfobacterota_D	c__UBA1144	o__RKRQ01	f__	g__	s__	69.21	0.84	1.34801	42.4
SE6864.rosella_refined.128_sub	d__Bacteria	p__Proteobacteria	c__Gammaproteobacteria	o__Ga0077536	f__Ga0077536	g__	s__	76.62	1.96	3.28536	57
SE6864.semibin_refined.003_sub	d__Bacteria	p__Proteobacteria	c__Alphaproteobacteria	o__Rhizobiales	f__Rhizobiaceae	g__JAALLB01	s__	80.37	0.96	2.55758	50.9
SE6864.semibin_refined.012	d__Bacteria	p__Proteobacteria	c__Alphaproteobacteria	o__Rhodobacterales	f__Rhodobacteraceae	g__Pikeienuella	s__	86.88	1.8	3.56458	63.6
SE6864.semibin_refined.013	d__Bacteria	p__Proteobacteria	c__Alphaproteobacteria	o__Caulobacterales	f__Maricaulaceae	g__Oceanicaulis	s__	88.24	1.23	2.91331	60.8
SE6864.semibin_refined.014_sub	d__Bacteria	p__Proteobacteria	c__Alphaproteobacteria	o__Rhodobacterales	f__Rhodobacteraceae	g__Cognatishimia	s__	57.37	0	2.39535	56.4
SE6864.semibin_refined.019	d__Bacteria	p__Proteobacteria	c__Alphaproteobacteria	o__Micavibrionales	f__Micavibrionaceae	g__UBA1672	s__	73.06	1.88	1.62561	44.4
SE6864.semibin_refined.064	d__Bacteria	p__Proteobacteria	c__Alphaproteobacteria	o__Rhizobiales	f__Methyloligellaceae	g__UBA2767	s__	60.25	7.98	2.46379	59
SE6864.semibin_refined.069	d__Bacteria	p__Proteobacteria	c__Alphaproteobacteria	o__Rhizobiales	f__Rhizobiaceae	g__GCA-2401155	s__	99.34	1.41	4.88096	50.2
SE6864.semibin_refined.113	d__Bacteria	p__Patescibacteria	c__Paceibacteria	o__UBA9983_A	f__UBA2100	g__UBA2100	s__	61.79	1.71	0.663391	46
SE6864.semibin_refined.120	d__Bacteria	p__Planctomycetota	c__J058	o__J058	f__J058	g__	s__	91.4	5.38	11.204	71.7
SE6864.semibin_refined.127	d__Bacteria	p__Proteobacteria	c__Alphaproteobacteria	o__Rhizobiales	f__HXMU1428-3	g__HXMU1428-3	s__	96.16	1.94	4.21513	44.9
SE6864.semibin_refined.138	d__Bacteria	p__Proteobacteria	c__Alphaproteobacteria	o__Rhizobiales	f__Rhizobiaceae	g__JAALLB01	s__	78.78	1.2	2.57194	50.6
SE6864.semibin_refined.142_sub	d__Bacteria	p__Proteobacteria	c__Alphaproteobacteria	o__Rhizobiales	f__HXMU1428-3	g__HXMU1428-3	s__	96.72	1.24	5.41133	47.3
SE6864.semibin_refined.159_sub	d__Bacteria	p__Proteobacteria	c__Alphaproteobacteria	o__Rhodobacterales	f__Rhodobacteraceae	g__	s__	75.24	2.24	3.75908	59.3
SE6864.semibin_refined.165_sub	d__Bacteria	p__Desulfobacterota_B	c__Binatia	o__UTPRO1	f__UTPRO1	g__	s__	63.11	1.12	3.6433	68.6
SE6864.semibin_refined.171	d__Bacteria	p__Proteobacteria	c__Gammaproteobacteria	o__Ga0077536	f__Ga0077536	g__	s__	96.22	4.76	4.69557	65
SE6864.semibin_refined.172_sub	d__Bacteria	p__Proteobacteria	c__Alphaproteobacteria	o__Rhodobacterales	f__Rhodobacteraceae	g__Sulfitobacter	s__	50.03	0	2.46525	59.3
SE6864.semibin_refined.183	d__Bacteria	p__Proteobacteria	c__Alphaproteobacteria	o__Micavibrionales	f__Micavibrionaceae	g__UBA1850	s__	92.48	1.01	2.00858	42.3
SE6864.semibin_refined.186_sub	d__Bacteria	p__Proteobacteria	c__Gammaproteobacteria	o__Arenicellales	f__Arenicellaceae	g__	s__	91.94	0.46	2.69685	42.9
SE6864.vamb.002	d__Bacteria	p__Proteobacteria	c__Alphaproteobacteria	o__Rhodobacterales	f__Rhodobacteraceae	g__Roseovarius	s__	97.96	0.91	3.53184	55.7
SE6864.vamb.038	d__Bacteria	p__Proteobacteria	c__Gammaproteobacteria	o__Pseudomonadales	f__Cellvibrionaceae	g__	s__	99.35	0.52	3.48936	41.6
SE6864.vamb.047	d__Bacteria	p__Proteobacteria	c__Gammaproteobacteria	o__UBA4486	f__UBA4486	g__	s__	85.9	3.22	2.6146	43.7
SE6864.vamb.089	d__Bacteria	p__Proteobacteria	c__Alphaproteobacteria	o__Rhizobiales	f__Devosiaceae	g__	s__	96.84	0.88	2.7924	50.6
SE6867.metabat_sens.025	d__Bacteria	p__Proteobacteria	c__Alphaproteobacteria	o__Rhizobiales	f__Rhizobiaceae	g__Roseitalea	s__	98.41	0.42	4.03737	65.1
SE6867.metabat_sens.026	d__Bacteria	p__Proteobacteria	c__Alphaproteobacteria	o__Rhizobiales	f__Rhizobiaceae	g__Roseitalea	s__	98.8	2.29	4.0029	61.3
SE6867.semibin_refined.044	d__Bacteria	p__Acidobacteriota	c__Thermoanaerobaculia	o__UBA5704	f__UBA5704	g__	s__	96.58	2.24	10.9027	66.7

## Sheet: S6
								sec-SRP													Type II SS													Type III SS															Photosystem II
MAG_ID	Domain	Phylum	Class	Order	Family	Genus	Species	secA (K03070)	secB (K03071)	secD (K03072)	secE (K03073)	secF (K03074)	secG (K03075)	secY (K03076)	secDF (K12257)	secM (K13301)	yajC (K03210)	yidC (K03217)	ftsY (K03110)	ffh (K03106)	gspK (K02460)	gspL (K02461)	gspM (K02462)	gspC (K02452)	gspH (K02457)	gspI (K02458)	gspJ (K02459)	gspD (K02453)	gspE (K02454)	gspF (K02455)	gspG (K02456)	gspO (K02464)	gspS (K02465)	yscJ (K03222)	yscN (K03224)	yscQ (K03225)	yscR (K03226)	yscS (K03227)	yscT (K03228)	yscW (K04058)	yscL (K03223)	yscU (K03229)	yscV (K03230)	yscC (K03219)	yscF (K03221)	yscO (K04056)	yscP (K04057)	yscX (K04059)	psbB (K02704)
SE2451.concoct.100	d__Bacteria	p__Proteobacteria	c__Alphaproteobacteria	o__Caulobacterales	f__Parvularculaceae	g__Aquisalinus	s__	1	1	1	1	1	1	0	0	0	1	1	1	0	1	1	1	0	0	0	0	0	0	0	0	0	0	0	0	0	0	0	0	0	0	0	0	0	0	0	0	0	0
SE2451.maxbin.028	d__Bacteria	p__Proteobacteria	c__Alphaproteobacteria	o__Rhizobiales	f__MH13	g__MH13	s__	1	1	1	0	0	1	1	0	0	1	1	1	1	0	0	0	0	0	0	0	0	0	0	0	0	0	0	0	0	0	0	0	0	0	0	0	0	0	0	0	0	0
SE2451.maxbin.031	d__Bacteria	p__Proteobacteria	c__Alphaproteobacteria	o__UBA1280	f__	g__	s__	1	0	1	1	1	1	1	0	0	1	1	1	1	0	0	0	0	0	0	0	0	0	0	0	0	0	0	0	0	0	0	0	0	0	0	0	0	0	0	0	0	0
SE2451.metabat2_refined.001_sub	d__Bacteria	p__Proteobacteria	c__Alphaproteobacteria	o__Caulobacterales	f__Hyphomonadaceae	g__Henriciella	s__	1	1	0	0	0	0	0	0	0	0	1	1	0	0	0	0	1	1	1	1	0	0	0	0	0	0	0	0	0	0	0	0	0	0	0	0	0	0	0	0	0	0
SE2451.metabat2_refined.012	d__Bacteria	p__Proteobacteria	c__Alphaproteobacteria	o__Rhizobiales	f__MH13	g__MH13	s__	1	1	1	0	1	2	1	0	0	1	1	1	1	0	0	0	0	0	0	0	0	0	0	0	0	0	0	0	0	0	0	0	0	0	0	0	0	0	0	0	0	0
SE2451.metabat_sens.048	d__Bacteria	p__Proteobacteria	c__Alphaproteobacteria	o__Rhizobiales	f__Rhizobiaceae	g__Roseitalea	s__	1	1	0	1	0	1	1	1	0	1	1	1	1	0	0	0	0	0	0	0	0	0	0	0	0	0	0	0	0	0	0	0	0	0	0	0	0	0	0	0	0	0
SE2454.concoct.032	d__Bacteria	p__Proteobacteria	c__Alphaproteobacteria	o__Caulobacterales	f__Hyphomonadaceae	g__UBA5336	s__	1	1	1	1	1	1	1	0	0	1	1	1	1	1	1	1	1	1	1	1	1	1	1	1	0	0	0	0	0	0	0	0	0	0	0	0	0	0	0	0	0	0
SE2454.concoct.044_sub	d__Bacteria	p__Proteobacteria	c__Alphaproteobacteria	o__DSM-16000	f__Inquilinaceae	g__	s__	1	0	0	0	0	0	0	0	0	0	0	0	0	0	0	0	0	0	0	0	0	0	0	0	0	0	0	0	0	0	0	0	0	0	0	0	0	0	0	0	0	0
SE2454.concoct.065_sub	d__Bacteria	p__Myxococcota	c__UBA9042	o__PHBI01	f__	g__	s__	1	0	0	0	0	0	1	0	0	0	1	0	1	0	0	0	0	0	0	0	0	0	0	0	0	0	0	0	0	0	0	0	0	0	0	0	0	0	0	0	0	0
SE2454.concoct.096_sub	d__Bacteria	p__Bacteroidota	c__Bacteroidia	o__Flavobacteriales	f__	g__	s__	0	0	0	1	0	1	1	0	0	0	1	1	0	0	0	0	0	0	0	0	0	0	0	0	0	0	0	0	0	0	0	0	0	0	0	0	0	0	0	0	0	0
SE2454.concoct.100_sub	d__Bacteria	p__Planctomycetota	c__Phycisphaerae	o__Phycisphaerales	f__Phycisphaeraceae	g__Algisphaera	s__	1	0	0	0	0	1	1	0	0	1	1	0	0	2	0	1	0	1	2	1	1	0	0	5	0	0	0	0	0	0	0	0	0	0	0	0	0	0	0	0	0	0
SE2454.concoct.108_sub	d__Bacteria	p__Proteobacteria	c__Alphaproteobacteria	o__UBA8366	f__GCA-2696645	g__	s__	1	1	1	1	1	1	1	0	0	1	1	1	1	0	0	0	0	0	0	0	0	0	0	0	0	0	0	0	0	0	0	0	0	0	0	0	0	0	0	0	0	0
SE2454.concoct.119	d__Bacteria	p__Planctomycetota	c__Planctomycetia	o__Pirellulales	f__Lacipirellulaceae	g__Botrimarina	s__	3	0	0	1	0	1	1	1	0	1	0	1	0	1	0	0	0	0	1	0	2	0	0	1	0	0	0	0	0	0	0	0	0	0	0	0	0	0	0	0	0	0
SE2454.concoct.124	d__Bacteria	p__Proteobacteria	c__Gammaproteobacteria	o__Pseudomonadales	f__Halieaceae	g__	s__	2	1	1	1	1	1	1	0	0	1	1	1	1	2	1	1	1	1	1	1	2	2	1	2	0	0	0	0	0	0	0	0	0	0	0	0	0	0	0	0	0	0
SE2454.concoct.129_sub	d__Bacteria	p__Proteobacteria	c__Alphaproteobacteria	o__Rhodobacterales	f__Rhodobacteraceae	g__Cognatishimia	s__	0	1	0	0	0	0	0	0	0	0	0	1	1	0	0	0	0	0	0	0	0	0	0	0	0	0	0	0	0	0	0	0	0	0	0	0	0	0	0	0	0	0
SE2454.concoct.130_sub	d__Bacteria	p__Planctomycetota	c__UBA1135	o__UBA1135	f__GCA-002686595	g__GCA-2862085	s__	2	0	0	0	0	0	1	0	0	0	1	1	0	1	0	0	0	0	0	1	0	2	0	1	0	0	0	0	0	0	0	0	0	0	0	0	0	0	0	0	0	0
SE2454.concoct.152_sub	d__Bacteria	p__Proteobacteria	c__Alphaproteobacteria	o__Parvibaculales	f__CGMCC-115125	g__Pyruvatibacter	s__	1	0	1	0	1	1	0	0	0	1	1	0	0	0	0	0	0	0	0	0	0	0	0	0	0	0	0	0	0	0	0	0	0	0	0	0	0	0	0	0	0	0
SE2454.concoct.169	d__Bacteria	p__Proteobacteria	c__Alphaproteobacteria	o__	f__	g__	s__	1	1	0	1	0	1	1	1	0	1	1	0	1	0	0	0	0	0	0	0	1	0	0	0	0	0	0	0	0	0	0	0	0	0	0	0	0	0	0	0	0	0
SE2454.concoct.181_sub	d__Bacteria	p__Chlamydiota	c__Chlamydiia	o__Chlamydiales	f__JAAZZY01	g__	s__	1	0	0	0	0	1	0	0	0	1	1	1	1	0	0	0	0	0	0	0	0	0	0	0	0	0	1	1	1	1	1	1	1	0	0	0	0	0	0	0	0	0
SE2454.concoct.201_sub	d__Bacteria	p__Planctomycetota	c__Planctomycetia	o__Pirellulales	f__Pirellulaceae	g__Mariniblastus	s__	4	0	0	0	0	0	1	0	0	1	1	1	1	1	0	0	0	0	0	0	0	0	0	0	0	0	0	0	0	0	0	0	0	0	0	0	0	0	0	0	0	0
SE2454.concoct.207	d__Bacteria	p__Bacteroidota	c__Rhodothermia	o__Balneolales	f__Balneolaceae	g__	s__	1	0	0	0	0	0	0	0	0	1	1	0	0	0	0	0	0	0	0	0	0	0	0	0	0	0	0	0	0	0	0	0	0	0	0	0	0	0	0	0	0	0
SE2454.concoct.214_sub	d__Bacteria	p__Proteobacteria	c__Gammaproteobacteria	o__Pseudomonadales	f__Halieaceae	g__Congregibacter	s__	1	0	0	0	0	0	0	0	0	0	0	0	0	1	1	1	0	0	1	0	1	0	0	1	0	0	0	0	0	0	0	0	0	0	0	0	0	0	0	0	0	0
SE2454.concoct.236_sub	d__Bacteria	p__Proteobacteria	c__Alphaproteobacteria	o__Rhizobiales	f__HXMU1428-3	g__HXMU1428-3	s__	1	1	1	1	1	1	0	0	0	1	1	1	1	0	0	0	0	0	0	0	0	0	0	0	0	0	0	0	0	0	0	0	0	0	0	0	0	0	0	0	0	0
SE2454.concoct.243_sub	d__Bacteria	p__Proteobacteria	c__Alphaproteobacteria	o__Rickettsiales	f__UBA3002	g__	s__	0	1	0	0	0	1	1	0	0	0	0	0	0	0	0	0	0	0	0	0	0	0	0	0	0	0	0	0	0	0	0	0	0	0	0	0	0	0	0	0	0	0
SE2454.concoct.289_sub	d__Bacteria	p__Bacteroidota	c__Bacteroidia	o__Cytophagales	f__Cyclobacteriaceae	g__	s__	1	0	0	0	0	0	0	0	0	1	0	0	1	0	0	0	0	0	0	0	0	0	0	0	0	0	0	0	0	0	0	0	0	0	0	0	0	0	0	0	0	0
SE2454.maxbin.030_sub	d__Bacteria	p__Planctomycetota	c__Planctomycetia	o__Pirellulales	f__Lacipirellulaceae	g__Botrimarina	s__	1	0	0	1	0	1	1	1	0	1	1	1	0	1	0	0	0	0	1	0	2	0	0	1	0	0	0	0	0	0	0	0	0	0	0	0	0	0	0	0	0	0
SE2454.maxbin.049	d__Bacteria	p__Proteobacteria	c__Gammaproteobacteria	o__UBA4575	f__UBA4575	g__JABDMD01	s__	1	1	1	1	1	1	1	0	0	1	1	1	1	2	2	2	2	1	2	2	2	1	1	4	0	0	0	0	0	0	0	0	0	0	0	0	0	0	0	0	0	0
SE2454.maxbin.099_sub	d__Bacteria	p__Bacteroidota	c__Bacteroidia	o__Flavobacteriales	f__Flavobacteriaceae	g__Aquimarina	s__	0	0	0	0	0	1	0	1	0	1	1	0	0	0	0	0	0	0	0	0	0	0	0	0	0	0	0	0	0	0	0	0	0	0	0	0	0	0	0	0	0	0
SE2454.maxbin.115	d__Bacteria	p__Proteobacteria	c__Alphaproteobacteria	o__Rhizobiales	f__Amorphaceae	g__Acuticoccus	s__	1	1	1	0	0	1	1	0	0	1	0	1	0	0	0	0	0	0	0	0	0	0	0	0	0	0	0	0	0	0	0	0	0	0	0	0	0	0	0	0	0	0
SE2454.maxbin.140	d__Bacteria	p__Bacteroidota	c__Bacteroidia	o__Flavobacteriales	f__Flavobacteriaceae	g__DT-32	s__	0	0	0	0	0	0	1	0	0	0	1	0	0	0	0	0	0	0	0	0	0	0	0	0	0	0	0	0	0	0	0	0	0	0	0	0	0	0	0	0	0	0
SE2454.maxbin.142	d__Bacteria	p__Proteobacteria	c__Alphaproteobacteria	o__Rhizobiales	f__Rhizobiaceae	g__Roseitalea	s__	1	1	0	1	0	2	1	1	0	1	0	1	1	0	0	0	0	0	0	0	0	0	0	0	0	0	0	0	0	0	0	0	0	0	0	0	0	0	0	0	0	0
SE2454.maxbin.176	d__Bacteria	p__Patescibacteria	c__Gracilibacteria	o__Peribacterales	f__Peribacteraceae	g__UBA2170	s__	1	0	0	1	0	0	1	0	0	0	1	0	0	0	0	0	0	0	0	0	0	0	0	0	0	0	0	0	0	0	0	0	0	0	0	0	0	0	0	0	0	0
SE2454.metabat2_refined.036	d__Bacteria	p__Proteobacteria	c__Gammaproteobacteria	o__Enterobacterales	f__Alteromonadaceae	g__Aliiglaciecola	s__	1	1	1	1	1	1	1	0	0	1	1	1	1	2	1	1	1	1	1	1	2	1	1	2	0	0	0	0	0	0	0	0	0	0	0	0	0	0	0	0	0	0
SE2454.metabat2_refined.047_sub	d__Bacteria	p__Bdellovibrionota_C	c__UBA2361	o__UBA2361	f__RFPC01	g__	s__	1	0	1	1	0	1	1	0	0	1	1	1	1	1	0	0	1	0	1	1	1	1	0	1	0	0	0	0	0	0	0	0	0	0	0	0	0	0	0	0	0	0
SE2454.metabat2_refined.100	d__Bacteria	p__Bacteroidota	c__Bacteroidia	o__Flavobacteriales	f__Salibacteraceae	g__GCA-2705995	s__	1	0	0	0	0	1	1	1	0	1	1	1	1	0	0	0	0	0	0	0	0	0	0	0	0	0	0	0	0	0	0	0	0	0	0	0	0	0	0	0	0	0
SE2454.metabat2_refined.113	d__Bacteria	p__Planctomycetota	c__Phycisphaerae	o__Phycisphaerales	f__Phycisphaeraceae	g__	s__	2	0	0	1	0	1	1	1	0	1	1	1	1	2	0	0	0	0	1	2	2	1	0	5	0	0	0	0	0	0	0	0	0	0	0	0	0	0	0	0	0	0
SE2454.metabat2_refined.136	d__Bacteria	p__Proteobacteria	c__Gammaproteobacteria	o__Pseudomonadales	f__Halieaceae	g__Congregibacter	s__Congregibacter sp002428935	1	1	1	1	1	1	1	0	0	1	1	1	1	2	1	1	1	2	2	2	2	1	2	2	0	0	0	0	0	0	0	0	0	0	0	0	0	0	0	0	0	0
SE2454.metabat2_refined.161_sub	d__Bacteria	p__Bacteroidota	c__Bacteroidia	o__Flavobacteriales	f__Flavobacteriaceae	g__Winogradskyella	s__	0	0	0	1	0	0	0	1	0	1	1	1	1	0	0	0	0	0	0	0	0	0	0	0	0	0	0	0	0	0	0	0	0	0	0	0	0	0	0	0	0	0
SE2454.metabat2_refined.167_sub	d__Bacteria	p__Planctomycetota	c__Planctomycetia	o__Pirellulales	f__Pirellulaceae	g__	s__	1	0	0	2	0	0	0	1	0	1	1	0	1	1	0	0	0	0	0	0	0	2	0	2	0	0	0	0	0	0	0	0	0	0	0	0	0	0	0	0	0	0
SE2454.metabat2_refined.197	d__Bacteria	p__Proteobacteria	c__Alphaproteobacteria	o__Sphingomonadales	f__Sphingomonadaceae	g__Parasphingopyxis	s__	1	1	1	1	1	1	1	0	0	1	1	0	1	1	1	1	0	0	0	1	0	0	0	0	0	0	0	0	0	0	0	0	0	0	0	0	0	0	0	0	0	0
SE2454.metabat2_refined.209	d__Bacteria	p__Proteobacteria	c__Gammaproteobacteria	o__UBA6186	f__UBA6186	g__	s__	0	1	0	1	0	0	1	0	0	1	0	1	1	0	0	0	0	0	0	0	0	0	0	0	0	0	0	0	0	0	0	0	0	0	0	0	0	0	0	0	0	0
SE2454.metabat2_refined.246_sub	d__Bacteria	p__Bdellovibrionota	c__Bdellovibrionia	o__Bdellovibrionales	f__	g__	s__	2	0	1	0	1	1	0	0	0	1	1	0	0	0	0	0	0	0	0	1	0	0	0	1	0	0	0	0	0	0	0	0	0	0	0	0	0	0	0	0	0	0
SE2454.metabat2_refined.364_sub	d__Bacteria	p__Planctomycetota	c__Planctomycetia	o__Planctomycetales	f__Planctomycetaceae	g__	s__	1	0	0	1	0	1	0	1	0	0	0	1	1	1	0	0	0	0	0	1	0	1	0	2	0	0	0	0	0	0	0	0	0	0	0	0	0	0	0	0	0	0
SE2454.metabat_spec.012	d__Bacteria	p__Proteobacteria	c__Alphaproteobacteria	o__Rhodobacterales	f__Rhodobacteraceae	g__HKCCE3408	s__	1	1	1	1	1	1	1	0	0	1	1	1	1	0	0	0	0	0	0	0	0	0	0	0	0	0	0	0	0	0	0	0	0	0	0	0	0	0	0	0	0	0
SE2454.metabat_spec.018_sub	d__Bacteria	p__Proteobacteria	c__Alphaproteobacteria	o__Rhodobacterales	f__Rhodobacteraceae	g__Mangrovicoccus	s__	1	1	0	0	0	0	0	0	0	0	0	0	0	0	0	0	0	0	0	0	0	0	0	0	0	0	0	0	0	0	0	0	0	0	0	0	0	0	0	0	0	0
SE2454.metabat_sspec.050	d__Bacteria	p__Proteobacteria	c__Alphaproteobacteria	o__Micavibrionales	f__Micavibrionaceae	g__	s__	0	1	1	1	1	1	1	0	0	1	1	1	1	0	0	0	0	0	0	0	0	0	0	0	0	0	0	0	0	0	0	0	0	0	0	0	0	0	0	0	0	0
SE2454.rosella_refine.246_0	d__Bacteria	p__Proteobacteria	c__Alphaproteobacteria	o__UBA8366	f__GCA-2696645	g__Hwanghaeella	s__	0	0	0	1	0	1	1	0	0	1	0	1	1	0	0	0	0	0	0	0	0	0	0	0	0	0	0	0	0	0	0	0	0	0	0	0	0	0	0	0	0	0
SE2454.rosella_refined.047	d__Bacteria	p__Verrucomicrobiota	c__Verrucomicrobiae	o__Opitutales	f__JABSRG01	g__JABSRG01	s__	1	0	0	1	0	1	1	1	0	1	1	1	1	1	0	1	0	0	0	0	1	0	0	1	0	0	0	0	0	0	0	0	0	0	0	0	0	0	0	0	0	0
SE2454.rosella_refined.053	d__Bacteria	p__Planctomycetota	c__Phycisphaerae	o__Phycisphaerales	f__UBA1924	g__	s__	2	0	0	1	0	1	1	1	0	1	1	1	1	0	0	0	0	0	0	0	0	0	0	3	0	0	0	0	0	0	0	0	0	0	0	0	0	0	0	0	0	0
SE2454.rosella_refined.054	d__Bacteria	p__Proteobacteria	c__Gammaproteobacteria	o__Woeseiales	f__	g__	s__	1	1	1	0	1	1	1	0	0	1	1	1	1	1	1	1	1	1	1	1	1	1	1	1	0	0	0	0	0	0	0	0	0	0	0	0	0	0	0	0	0	0
SE2454.rosella_refined.112_sub	d__Bacteria	p__Proteobacteria	c__Alphaproteobacteria	o__Rhodobacterales	f__Rhodobacteraceae	g__Mangrovicoccus	s__	1	1	1	0	1	0	0	0	0	1	0	0	1	0	0	0	0	0	0	0	0	0	0	0	0	0	0	0	0	0	0	0	0	0	0	0	0	0	0	0	0	0
SE2454.rosella_refined.124_sub	d__Bacteria	p__Bacteroidota	c__Bacteroidia	o__Cytophagales	f__Cyclobacteriaceae	g__Fulvivirga	s__	1	0	0	0	0	1	1	0	0	1	1	1	1	0	0	0	0	0	0	0	0	0	0	0	0	0	0	0	0	0	0	0	0	0	0	0	0	0	0	0	0	0
SE2454.rosella_refined.219	d__Bacteria	p__Patescibacteria	c__ABY1	o__Magasanikbacterales	f__UBA922	g__	s__	1	0	1	1	0	1	1	0	0	0	1	0	1	0	0	0	0	0	0	0	0	0	0	1	0	0	0	0	0	0	0	0	0	0	0	0	0	0	0	0	0	0
SE2454.semibin_refined.011_sub	d__Bacteria	p__Bacteroidota	c__Bacteroidia	o__Flavobacteriales	f__Flavobacteriaceae	g__Croceitalea	s__	1	0	0	0	0	1	1	1	0	1	0	1	1	0	0	0	0	0	0	0	0	0	0	0	0	0	0	0	0	0	0	0	0	0	0	0	0	0	0	0	0	0
SE2454.semibin_refined.018_sub	d__Bacteria	p__Proteobacteria	c__Alphaproteobacteria	o__Sphingomonadales	f__Sphingomonadaceae	g__Erythrobacter	s__	1	1	0	1	1	1	0	0	0	0	1	0	1	0	0	0	0	0	0	0	0	0	0	0	0	0	0	0	0	0	0	0	0	0	0	0	0	0	0	0	0	0
SE2454.semibin_refined.022	d__Bacteria	p__Proteobacteria	c__Alphaproteobacteria	o__Rhizobiales	f__Aestuariivirgaceae	g__Anderseniella	s__	1	1	1	0	1	1	1	0	0	1	1	1	1	0	0	0	0	0	0	0	0	0	0	0	0	0	0	0	0	0	0	0	0	0	0	0	0	0	0	0	0	0
SE2454.semibin_refined.031_sub	d__Bacteria	p__Proteobacteria	c__Alphaproteobacteria	o__Rhizobiales	f__Im1	g__CAJQND01	s__	2	1	0	1	0	1	2	0	0	1	1	0	1	0	0	0	0	0	0	0	0	0	0	0	0	0	0	0	0	0	0	0	0	0	0	0	0	0	0	0	0	0
SE2454.semibin_refined.035	d__Bacteria	p__Bdellovibrionota	c__Bdellovibrionia	o__Bdellovibrionales	f__Bdellovibrionaceae	g__	s__	1	0	1	0	1	1	1	0	0	1	1	1	1	1	0	0	1	0	0	1	1	0	0	1	0	0	0	0	0	0	0	0	0	0	0	0	0	0	0	0	0	0
SE2454.semibin_refined.055_sub	d__Bacteria	p__Proteobacteria	c__Alphaproteobacteria	o__Rhizobiales	f__Hyphomicrobiaceae	g__GCA-2689605	s__	1	0	1	0	0	0	1	0	0	0	0	1	2	0	0	0	0	0	0	0	0	0	0	0	0	0	0	0	0	0	0	0	0	0	0	0	0	0	0	0	0	0
SE2454.semibin_refined.058	d__Bacteria	p__Planctomycetota	c__Planctomycetia	o__Pirellulales	f__Lacipirellulaceae	g__	s__	2	0	0	0	0	0	1	1	0	0	1	0	0	0	0	0	0	0	0	0	0	0	0	0	0	0	0	0	0	0	0	0	0	0	0	0	0	0	0	0	0	0
SE2454.semibin_refined.059	d__Bacteria	p__Planctomycetota	c__Planctomycetia	o__Pirellulales	f__Lacipirellulaceae	g__Bythopirellula	s__	2	0	0	0	0	1	1	0	0	0	0	1	1	1	0	0	0	0	1	0	0	0	0	2	0	0	0	0	0	0	0	0	0	0	0	0	0	0	0	0	0	0
SE2454.semibin_refined.070_sub	d__Bacteria	p__Proteobacteria	c__Alphaproteobacteria	o__Rhodobacterales	f__Rhodobacteraceae	g__Roseovarius	s__	1	1	0	0	1	1	0	0	0	0	1	0	1	0	0	0	0	0	0	0	0	0	0	0	0	0	0	0	0	0	0	0	0	0	0	0	0	0	0	0	0	0
SE2454.semibin_refined.076	d__Bacteria	p__Planctomycetota	c__Planctomycetia	o__Planctomycetales	f__Planctomycetaceae	g__	s__	0	0	0	0	0	1	1	0	0	0	1	1	1	1	0	0	0	0	0	1	1	0	1	1	0	0	0	0	0	0	0	0	0	0	0	0	0	0	0	0	0	0
SE2454.semibin_refined.077	d__Bacteria	p__Proteobacteria	c__Alphaproteobacteria	o__Rhodobacterales	f__Rhodobacteraceae	g__Rhodobacter_B	s__	1	1	1	1	1	0	0	0	0	1	0	1	1	1	0	1	1	0	0	1	1	0	0	1	0	0	0	0	0	0	0	0	0	0	0	0	0	0	0	0	0	0
SE2454.semibin_refined.088	d__Bacteria	p__Patescibacteria	c__Paceibacteria	o__Moranbacterales	f__GCA-2747515	g__	s__	1	0	0	1	0	1	1	0	0	0	1	0	0	0	0	0	0	0	0	0	0	0	0	0	0	0	0	0	0	0	0	0	0	0	0	0	0	0	0	0	0	0
SE2454.semibin_refined.089	d__Bacteria	p__Proteobacteria	c__Alphaproteobacteria	o__Caulobacterales	f__Hyphomonadaceae	g__Henriciella	s__	1	1	1	0	0	1	1	0	0	1	0	1	1	1	1	1	1	0	1	1	1	0	0	0	0	0	0	0	0	0	0	0	0	0	0	0	0	0	0	0	0	0
SE2454.semibin_refined.108	d__Bacteria	p__Proteobacteria	c__Alphaproteobacteria	o__Micavibrionales	f__Micavibrionaceae	g__TMED27	s__	1	1	0	1	0	1	1	0	0	0	0	1	0	0	0	0	0	0	0	0	0	0	0	0	0	0	0	0	0	0	0	0	0	0	0	0	0	0	0	0	0	0
SE2454.semibin_refined.112	d__Bacteria	p__Bacteroidota	c__Bacteroidia	o__Flavobacteriales	f__Salibacteraceae	g__UBA6049	s__	2	0	0	0	0	1	0	0	0	1	1	1	1	0	0	0	0	0	0	0	0	0	0	0	0	0	0	0	0	0	0	0	0	0	0	0	0	0	0	0	0	0
SE2454.semibin_refined.123	d__Bacteria	p__Chlamydiota	c__Chlamydiia	o__Chlamydiales	f__Simkaniaceae	g__	s__	1	0	0	1	0	0	1	1	0	1	1	0	0	0	0	0	0	0	0	0	0	0	0	0	0	0	1	0	0	1	1	1	0	0	0	0	0	0	0	0	0	0
SE2454.semibin_refined.125	d__Bacteria	p__Proteobacteria	c__Alphaproteobacteria	o__Rhodobacterales	f__Rhodobacteraceae	g__Ruegeria	s__	1	1	1	1	1	1	0	0	0	1	1	1	1	0	0	0	0	0	0	0	0	0	0	0	0	0	0	0	0	0	0	0	0	0	0	0	0	0	0	0	0	0
SE2454.semibin_refined.128	d__Bacteria	p__Proteobacteria	c__Gammaproteobacteria	o__Pseudomonadales	f__Oleiphilaceae	g__PZPK01	s__	2	0	0	0	1	1	1	0	0	0	0	1	0	0	0	0	1	0	0	0	0	0	0	0	0	0	0	0	0	0	0	0	0	0	0	0	0	0	0	0	0	0
SE2454.semibin_refined.149	d__Bacteria	p__Proteobacteria	c__Alphaproteobacteria	o__Caulobacterales	f__Hyphomonadaceae	g__Henriciella	s__	1	1	1	1	1	1	1	0	0	1	1	1	1	1	1	1	1	1	1	1	2	0	1	2	0	0	1	0	0	1	0	0	0	0	0	0	0	0	0	0	0	0
SE2454.semibin_refined.226	d__Bacteria	p__Proteobacteria	c__Alphaproteobacteria	o__Rhodobacterales	f__Rhodobacteraceae	g__Roseovarius	s__	1	1	0	1	0	1	1	1	0	1	1	1	1	1	0	1	0	0	1	1	1	0	0	1	0	0	0	0	0	0	0	0	0	0	0	0	0	0	0	0	0	0
SE2454.semibin_refined.241	d__Bacteria	p__Bacteroidota	c__Bacteroidia	o__Flavobacteriales	f__Flavobacteriaceae	g__Croceivirga	s__	1	0	0	1	0	1	1	1	0	1	1	1	1	0	0	0	0	0	0	0	0	0	0	0	0	0	0	0	0	0	0	0	0	0	0	0	0	0	0	0	0	0
SE2454.semibin_refined.260	d__Bacteria	p__Planctomycetota	c__PLA2	o__PLA2	f__JAEUHO01	g__	s__	1	0	0	1	0	1	1	1	0	1	1	1	1	1	0	0	0	0	0	1	1	1	0	2	0	0	0	0	0	0	0	0	0	0	0	0	0	0	0	0	0	0
SE2454.semibin_refined.268	d__Bacteria	p__Proteobacteria	c__Alphaproteobacteria	o__Rhizobiales	f__Rhizobiaceae	g__JAALLB01	s__	1	1	0	1	0	1	1	1	0	1	1	1	1	0	0	0	0	0	0	0	0	0	0	0	0	0	0	0	0	0	0	0	0	0	0	0	0	0	0	0	0	0
SE2454.semibin_refined.272	d__Bacteria	p__Bacteroidota	c__Bacteroidia	o__Flavobacteriales	f__Vicingaceae	g__	s__	1	0	0	0	0	1	1	1	0	1	0	1	1	0	0	0	0	0	0	0	0	0	0	0	0	0	0	0	0	0	0	0	0	0	0	0	0	0	0	0	0	0
SE2454.semibin_refined.275_sub	d__Bacteria	p__Proteobacteria	c__Alphaproteobacteria	o__Rhodobacterales	f__Rhodobacteraceae	g__Roseobacter	s__	0	1	0	0	1	0	1	0	0	0	1	0	1	1	0	1	1	0	1	0	1	0	0	0	0	0	0	0	0	0	0	0	0	0	0	0	0	0	0	0	0	0
SE2454.semibin_refined.280	d__Bacteria	p__Proteobacteria	c__Gammaproteobacteria	o__Pseudomonadales	f__HTCC2089	g__	s__	1	1	0	1	1	1	1	0	0	1	1	1	0	1	1	1	2	1	1	1	1	2	0	1	0	0	0	0	0	0	0	0	0	0	0	0	0	0	0	0	0	0
SE2454.semibin_refined.296_sub	d__Bacteria	p__Proteobacteria	c__Gammaproteobacteria	o__Pseudomonadales	f__GM7GCV1	g__GM7GCV1	s__	1	1	1	0	1	1	1	0	0	1	1	1	1	1	1	0	1	0	1	1	1	2	0	1	0	0	0	0	0	0	0	0	0	0	0	0	0	0	0	0	0	0
SE2454.semibin_refined.298_sub	d__Bacteria	p__Proteobacteria	c__Alphaproteobacteria	o__Rhodobacterales	f__Rhodobacteraceae	g__Roseobacter	s__	0	0	0	1	1	0	0	0	0	0	1	0	0	0	0	0	0	0	0	0	0	0	0	0	0	0	0	0	0	0	0	0	0	0	0	0	0	0	0	0	0	0
SE2454.semibin_refined.303	d__Bacteria	p__Proteobacteria	c__Gammaproteobacteria	o__UBA6186	f__UBA6186	g__	s__	1	1	0	1	0	1	1	0	0	1	1	1	1	0	0	0	0	0	0	0	0	0	0	0	0	0	0	0	0	0	0	0	0	0	0	0	0	0	0	0	0	0
SE2454.semibin_refined.306	d__Bacteria	p__Proteobacteria	c__Gammaproteobacteria	o__Berkiellales	f__Berkiellaceae	g__	s__	1	1	1	1	0	1	1	0	0	1	1	1	1	0	0	0	0	0	0	0	0	0	0	0	0	0	0	0	0	0	0	0	0	0	0	0	0	0	0	0	0	0
SE2454.semibin_refined.315	d__Bacteria	p__Bdellovibrionota_C	c__UBA2361	o__UBA2361	f__RFPC01	g__RFPC01	s__	1	0	1	1	0	1	1	0	0	1	1	1	1	1	0	0	1	0	1	1	1	1	0	1	0	0	0	0	0	0	0	0	0	0	0	0	0	0	0	0	0	0
SE2454.semibin_refined.322	d__Bacteria	p__Proteobacteria	c__Alphaproteobacteria	o__Rhodobacterales	f__Rhodobacteraceae	g__Shimia	s__	1	1	1	1	1	1	1	0	0	1	1	1	1	0	0	0	0	0	0	0	0	0	0	0	0	0	0	0	0	0	0	0	0	0	0	0	0	0	0	0	0	0
SE2454.semibin_refined.326	d__Bacteria	p__Proteobacteria	c__Gammaproteobacteria	o__DSM-16500	f__DSM-16500	g__	s__	1	1	1	1	1	1	1	0	0	1	1	1	1	1	1	1	1	1	1	1	1	1	1	1	0	0	0	0	0	0	0	0	0	0	0	0	0	0	0	0	0	0
SE2454.semibin_refined.334	d__Bacteria	p__Proteobacteria	c__Alphaproteobacteria	o__Caulobacterales	f__Hyphomonadaceae	g__Henriciella	s__	1	1	1	1	1	1	1	0	0	1	1	1	1	1	1	1	1	1	1	1	1	1	1	1	0	0	0	0	0	0	0	0	0	0	0	0	0	0	0	0	0	0
SE2454.vamb.046	d__Bacteria	p__Cyanobacteria	c__Vampirovibrionia	o__Obscuribacterales	f__Obscuribacteraceae	g__RI-106	s__	1	0	1	1	0	1	0	0	0	0	1	1	1	0	0	0	0	0	0	0	0	0	0	0	0	0	0	0	0	0	0	0	0	0	0	0	0	0	0	0	0	0
SE2454.vamb.047_sub	d__Bacteria	p__Acidobacteriota	c__Thermoanaerobaculia	o__UBA5704	f__UBA5704	g__	s__	0	0	0	0	0	1	0	0	0	1	0	0	0	0	0	0	0	0	0	0	1	0	0	1	0	0	0	0	0	0	0	0	0	0	0	0	0	0	0	0	0	0
SE2454.vamb.069	d__Bacteria	p__Proteobacteria	c__Gammaproteobacteria	o__Pseudomonadales	f__Cellvibrionaceae	g__	s__	1	1	1	1	1	1	1	0	0	2	1	1	1	1	1	1	1	1	1	1	1	2	1	1	0	0	0	0	0	0	0	0	0	0	0	0	0	0	0	0	0	0
SE2454.vamb.072	d__Bacteria	p__Proteobacteria	c__Alphaproteobacteria	o__Rhizobiales	f__Methyloligellaceae	g__MnTg02	s__	1	1	1	1	1	1	1	0	0	1	1	1	1	1	0	0	0	0	1	1	1	0	0	1	0	0	0	0	0	0	0	0	0	0	0	0	0	0	0	0	0	0
SE2454.vamb.099	d__Bacteria	p__Proteobacteria	c__Alphaproteobacteria	o__Micavibrionales	f__Micavibrionaceae	g__GCA-2708415	s__	1	1	1	1	1	1	1	0	0	1	1	1	1	0	0	0	0	0	0	0	0	0	0	0	0	0	0	0	0	0	0	0	0	0	0	0	0	0	0	0	0	0
SE2454.vamb.104_sub	d__Bacteria	p__Verrucomicrobiota	c__Verrucomicrobiae	o__Verrucomicrobiales	f__DEV007	g__Arctic95D-9	s__	1	0	0	1	0	1	1	1	0	1	1	1	1	2	0	0	0	0	0	0	1	0	0	1	0	0	0	0	0	0	0	0	0	0	0	0	0	0	0	0	0	0
SE2454.vamb.186	d__Bacteria	p__Proteobacteria	c__Alphaproteobacteria	o__Rickettsiales	f__1604HC	g__	s__	1	0	0	0	0	1	1	0	0	0	1	0	0	0	0	0	0	0	0	0	0	0	0	0	0	0	0	0	0	0	0	0	0	0	0	0	0	0	0	0	0	0
SE2457.concoct.012_sub	d__Bacteria	p__Proteobacteria	c__Alphaproteobacteria	o__Rhizobiales	f__MH13	g__MH13	s__	0	0	0	0	0	0	0	0	0	0	1	1	0	0	0	0	0	0	0	0	0	0	0	0	0	0	0	0	0	0	0	0	0	0	0	0	0	0	0	0	0	0
SE2457.metabat2_refined.064_sub	d__Bacteria	p__Proteobacteria	c__Alphaproteobacteria	o__Rhodobacterales	f__Rhodobacteraceae	g__Dinoroseobacter	s__	0	0	0	1	0	1	0	0	0	1	0	0	1	0	0	0	0	0	0	0	0	0	0	0	0	0	0	0	0	0	0	0	0	0	0	0	0	0	0	0	0	0
SE2457.metabat_sens.020	d__Bacteria	p__Proteobacteria	c__Alphaproteobacteria	o__Micavibrionales	f__Micavibrionaceae	g__TMED27	s__	1	1	1	1	1	1	1	0	0	1	1	1	1	0	0	0	0	0	0	0	0	0	0	0	0	0	0	0	0	0	0	0	0	0	0	0	0	0	0	0	0	0
SE2457.metabat_sens.046_sub	d__Bacteria	p__Proteobacteria	c__Alphaproteobacteria	o__Rhodobacterales	f__Rhodobacteraceae	g__IMCC34051	s__	1	1	1	1	1	1	1	0	0	1	1	1	1	1	0	0	0	0	0	0	1	0	0	1	0	0	0	0	0	0	0	0	0	0	0	0	0	0	0	0	0	0
SE2458.concoct.032	d__Bacteria	p__Proteobacteria	c__Alphaproteobacteria	o__Micavibrionales	f__Micavibrionaceae	g__	s__	0	1	1	0	1	1	1	0	0	1	0	1	1	0	0	0	0	0	0	0	0	0	0	0	0	0	0	0	0	0	0	0	0	0	0	0	0	0	0	0	0	0
SE2460.concoct.126	d__Bacteria	p__Proteobacteria	c__Gammaproteobacteria	o__UBA4575	f__UBA4575	g__JABDMD01	s__	1	1	1	0	1	1	1	0	0	1	1	1	1	2	2	2	2	1	2	2	1	2	1	2	0	0	0	0	0	0	0	0	0	0	0	0	0	0	0	0	0	0
SE2460.concoct.156	d__Bacteria	p__Proteobacteria	c__Alphaproteobacteria	o__Rhodospirillales	f__Casp-alpha2	g__UBA4479	s__	0	0	0	1	1	1	1	0	0	1	1	0	1	0	0	0	0	0	0	0	0	0	0	0	0	0	0	0	0	0	0	0	0	0	0	0	0	0	0	0	0	0
SE2460.concoct.173_sub	d__Bacteria	p__Patescibacteria	c__Paceibacteria	o__UBA9983_A	f__UBA918	g__OLB19	s__	2	0	0	0	0	1	1	0	0	0	1	0	0	0	0	0	0	0	0	0	0	0	0	0	0	0	0	0	0	0	0	0	0	0	0	0	0	0	0	0	0	0
SE2460.maxbin.077_sub	d__Bacteria	p__Proteobacteria	c__Gammaproteobacteria	o__UBA6186	f__UBA6186	g__	s__	1	0	1	0	0	1	0	0	0	0	1	0	0	1	0	0	0	0	0	0	0	0	0	0	0	0	0	0	0	0	0	0	0	0	0	0	0	0	0	0	0	0
SE2460.maxbin.078_sub	d__Bacteria	p__Proteobacteria	c__Gammaproteobacteria	o__Enterobacterales	f__Alteromonadaceae	g__	s__	1	1	1	0	1	1	1	0	0	1	1	1	1	2	1	1	1	1	1	1	1	1	1	2	0	0	0	0	0	0	0	0	0	0	0	0	0	0	0	0	0	0
SE2460.metabat2_refined.013	d__Bacteria	p__Bacteroidota	c__Bacteroidia	o__Cytophagales	f__	g__	s__	1	0	0	1	0	1	1	1	0	1	0	0	0	0	0	0	0	0	0	0	0	0	0	0	0	0	0	0	0	0	0	0	0	0	0	0	0	0	0	0	0	0
SE2460.metabat2_refined.027_sub	d__Bacteria	p__Proteobacteria	c__Alphaproteobacteria	o__Rhodobacterales	f__Rhodobacteraceae	g__Roseicyclus	s__	2	1	0	1	0	0	1	0	0	0	1	1	0	0	0	0	0	0	0	0	0	0	0	0	0	0	0	0	0	0	0	0	0	0	0	0	0	0	0	0	0	0
SE2460.rosella_refined.080	d__Bacteria	p__Proteobacteria	c__Alphaproteobacteria	o__Rhizobiales	f__Rhizobiaceae	g__Roseitalea	s__	1	1	0	0	0	1	1	1	0	1	1	1	1	0	0	0	0	0	0	0	0	0	0	0	0	0	0	0	0	0	0	0	0	0	0	0	0	0	0	0	0	0
SE2460.rosella_refined.092	d__Bacteria	p__Proteobacteria	c__Alphaproteobacteria	o__Rhizobiales	f__OSC116	g__	s__	1	1	1	0	1	1	1	0	0	1	1	1	0	0	0	0	0	0	0	0	0	0	0	0	0	0	0	0	0	0	0	0	0	0	0	0	0	0	0	0	0	0
SE2460.semibin_refined.005	d__Bacteria	p__Bacteroidota	c__Rhodothermia	o__Balneolales	f__Balneolaceae	g__HXMU1420-13	s__	1	0	1	0	1	1	1	0	0	1	1	1	1	0	0	0	0	0	0	0	0	0	0	0	0	0	0	0	0	0	0	0	0	0	0	0	0	0	0	0	0	0
SE2460.semibin_refined.063_sub	d__Bacteria	p__Proteobacteria	c__Alphaproteobacteria	o__Rhodobacterales	f__Rhodobacteraceae	g__Dinoroseobacter	s__	0	0	1	0	1	1	0	0	0	1	1	1	0	0	0	0	0	0	0	0	0	0	0	0	0	0	0	0	0	0	0	0	0	0	0	0	0	0	0	0	0	0
SE2460.vamb.024	d__Bacteria	p__Proteobacteria	c__Alphaproteobacteria	o__Rhizobiales	f__Rhizobiaceae	g__Roseitalea	s__	2	1	0	1	0	1	1	1	0	1	1	0	1	0	0	0	0	0	0	0	0	0	0	0	0	0	0	0	0	0	0	0	0	0	0	0	0	0	0	0	0	0
SE2461.maxbin.004_sub	d__Bacteria	p__Proteobacteria	c__Alphaproteobacteria	o__Rhodobacterales	f__Rhodobacteraceae	g__IMCC34051	s__	1	0	0	1	0	0	1	0	0	1	0	0	0	0	0	0	0	0	0	0	1	0	0	1	0	0	0	0	0	0	0	0	0	0	0	0	0	0	0	0	0	0
SE2464.concoct.043	d__Bacteria	p__Proteobacteria	c__Alphaproteobacteria	o__Caulobacterales	f__Hyphomonadaceae	g__Henriciella	s__	1	1	1	1	1	1	1	0	0	1	1	1	1	1	1	1	1	1	1	1	2	1	1	2	0	0	0	0	0	0	0	0	0	0	0	0	0	0	0	0	0	0
SE2464.concoct.091	d__Bacteria	p__Proteobacteria	c__Alphaproteobacteria	o__Kiloniellales	f__J153	g__	s__	0	0	0	0	0	1	2	0	0	0	0	0	1	0	0	0	0	0	0	0	0	0	0	0	0	0	0	0	0	0	0	0	0	0	0	0	0	0	0	0	0	0
SE2464.concoct.137_sub	d__Bacteria	p__Planctomycetota	c__Planctomycetia	o__Pirellulales	f__Lacipirellulaceae	g__	s__	2	0	0	0	0	1	0	0	0	0	1	0	1	1	0	0	0	0	0	0	0	0	0	2	0	0	0	0	0	0	0	0	0	0	0	0	0	0	0	0	0	0
SE2464.concoct.145	d__Bacteria	p__Proteobacteria	c__Alphaproteobacteria	o__Caulobacterales	f__Hyphomonadaceae	g__UBA5336	s__	2	1	0	0	0	1	1	0	0	1	0	1	0	1	1	1	0	1	1	1	2	1	0	2	0	0	0	0	0	0	0	0	0	0	0	0	0	0	0	0	0	0
SE2464.concoct.146	d__Bacteria	p__Cyanobacteria	c__Cyanobacteriia	o__Cyanobacteriales	f__Microcoleaceae	g__Okeania	s__	1	0	0	1	0	1	1	0	0	0	0	1	1	0	0	0	0	0	0	0	0	0	0	0	0	0	0	0	0	0	0	0	0	0	0	0	0	0	0	0	0	1
SE2464.concoct.169_sub	d__Bacteria	p__Planctomycetota	c__Planctomycetia	o__Pirellulales	f__Pirellulaceae	g__Mariniblastus	s__	2	0	0	0	0	0	0	1	0	1	0	0	0	0	0	0	0	0	0	0	0	1	0	0	0	0	0	0	0	0	0	0	0	0	0	0	0	0	0	0	0	0
SE2464.concoct.185	d__Bacteria	p__Proteobacteria	c__Alphaproteobacteria	o__Rhizobiales	f__Methyloligellaceae	g__UBA2767	s__	0	1	0	0	0	1	1	0	0	1	1	0	1	0	0	0	0	0	0	0	0	0	0	0	0	0	0	0	0	0	0	0	0	0	0	0	0	0	0	0	0	0
SE2464.maxbin.033	d__Bacteria	p__Proteobacteria	c__Gammaproteobacteria	o__Pseudomonadales	f__Cellvibrionaceae	g__	s__	1	1	1	1	0	1	1	0	0	1	1	1	1	1	1	1	2	1	1	1	1	2	1	1	0	0	0	0	0	0	0	0	0	0	0	0	0	0	0	0	0	0
SE2464.metabat2_refined.064	d__Bacteria	p__Planctomycetota	c__Planctomycetia	o__Pirellulales	f__Pirellulaceae	g__Stieleria	s__	1	0	0	0	0	1	1	0	0	0	1	1	1	0	1	0	0	0	0	0	0	0	0	0	0	0	0	1	1	1	1	1	0	1	1	1	0	0	0	0	0	0
SE2464.metabat2_refined.074	d__Bacteria	p__Bacteroidota	c__Bacteroidia	o__Flavobacteriales	f__Flavobacteriaceae	g__Winogradskyella	s__	1	0	0	1	0	1	1	1	0	1	1	1	1	0	0	0	0	0	0	0	0	0	0	0	0	0	0	0	0	0	0	0	0	0	0	0	0	0	0	0	0	0
SE2464.rosella_refined.073	d__Bacteria	p__Bacteroidota	c__Bacteroidia	o__Cytophagales	f__Amoebophilaceae	g__	s__	1	0	0	0	0	1	1	1	0	1	0	1	1	0	0	0	0	0	0	0	0	0	0	0	0	0	0	0	0	0	0	0	0	0	0	0	0	0	0	0	0	0
SE2468.concoct.038_sub	d__Bacteria	p__Proteobacteria	c__Alphaproteobacteria	o__Rhizobiales	f__Methyloligellaceae	g__UBA2767	s__	0	0	0	1	0	0	0	0	0	0	0	0	1	0	0	0	0	0	0	0	0	0	0	0	0	0	0	0	0	0	0	0	0	0	0	0	0	0	0	0	0	0
SE2473.concoct.013_sub	d__Bacteria	p__Proteobacteria	c__Alphaproteobacteria	o__Caulobacterales	f__Maricaulaceae	g__Oceanicaulis	s__	2	1	0	1	0	1	0	0	0	1	1	1	0	1	1	0	1	1	1	1	1	1	0	2	0	0	0	0	0	0	0	0	0	0	0	0	0	0	0	0	0	0
SE2473.concoct.052	d__Bacteria	p__Proteobacteria	c__Alphaproteobacteria	o__Rhizobiales	f__MH13	g__MH13	s__	1	1	1	1	1	1	1	0	0	1	1	1	1	0	0	0	0	0	0	0	0	0	0	0	0	0	0	0	0	0	0	0	0	0	0	0	0	0	0	0	0	0
SE2473.concoct.053_sub	d__Bacteria	p__Proteobacteria	c__Alphaproteobacteria	o__Rhodobacterales	f__Rhodobacteraceae	g__Ruegeria	s__	2	1	1	1	1	1	0	0	0	1	1	1	0	0	0	0	0	0	0	0	0	0	0	0	0	0	0	0	0	0	0	0	0	0	0	0	0	0	0	0	0	0
SE2473.concoct.070	d__Bacteria	p__Proteobacteria	c__Alphaproteobacteria	o__Rhizobiales	f__Rhizobiaceae	g__JAALLB01	s__	0	0	0	1	0	0	1	0	0	0	0	0	0	0	0	0	0	0	0	0	0	0	0	0	0	0	0	0	0	1	0	0	0	0	0	0	0	0	0	0	0	0
SE2473.concoct.079	d__Bacteria	p__Patescibacteria	c__ABY1	o__SG8-24	f__UBA9934	g__	s__	1	0	1	0	0	1	1	0	0	0	1	0	0	0	0	0	0	0	0	0	0	0	0	0	0	0	0	0	0	0	0	0	0	0	0	0	0	0	0	0	0	0
SE2473.concoct.154_sub	d__Bacteria	p__Planctomycetota	c__Planctomycetia	o__Planctomycetales	f__Planctomycetaceae	g__Fuerstia	s__	3	0	0	1	0	1	0	1	0	0	1	1	1	0	0	0	0	0	0	0	1	0	0	1	0	0	0	0	0	1	1	0	0	0	0	0	0	0	0	0	0	0
SE2473.concoct.155	d__Bacteria	p__Cyanobacteria	c__Cyanobacteriia	o__Cyanobacteriales	f__Microcoleaceae	g__Okeania	s__	0	0	0	1	0	0	0	0	0	0	0	0	0	0	0	0	0	0	0	0	0	0	0	1	0	0	0	0	0	0	0	0	0	0	0	0	0	0	0	0	0	1
SE2473.maxbin.015_sub	d__Bacteria	p__Proteobacteria	c__Alphaproteobacteria	o__Caulobacterales	f__Hyphomonadaceae	g__Henriciella	s__	1	1	1	1	1	1	0	0	0	1	1	1	1	1	1	1	1	1	1	1	1	1	1	1	0	0	0	0	0	0	0	0	0	0	0	0	0	0	0	0	0	0
SE2473.metabat2_refined.063	d__Bacteria	p__Proteobacteria	c__Alphaproteobacteria	o__Rhizobiales	f__Rhizobiaceae	g__Roseitalea	s__	1	1	0	0	0	1	0	0	0	0	1	1	1	0	0	0	0	0	0	0	0	0	0	0	0	0	0	0	0	0	0	0	0	0	0	0	0	0	0	0	0	0
SE2473.rosella_refined.002	d__Bacteria	p__Proteobacteria	c__Alphaproteobacteria	o__Caulobacterales	f__Hyphomonadaceae	g__Henriciella	s__	1	1	1	1	1	0	1	0	0	1	1	1	0	2	1	1	1	1	1	1	1	1	1	2	0	0	0	0	0	0	0	0	0	0	0	0	0	0	0	0	0	0
SE2473.rosella_refined.023	d__Bacteria	p__Proteobacteria	c__Gammaproteobacteria	o__UBA12402	f__UBA12402	g__	s__	1	1	0	1	1	1	1	0	0	1	1	1	1	0	0	0	0	0	0	0	0	0	0	0	0	0	0	0	0	0	0	0	0	0	0	0	0	0	0	0	0	0
SE2473.semibin_refined.066	d__Bacteria	p__Proteobacteria	c__Gammaproteobacteria	o__Pseudomonadales	f__Cellvibrionaceae	g__Agarilytica	s__	1	1	1	0	1	1	1	0	0	1	1	1	1	1	1	1	1	1	1	1	1	2	1	2	0	0	2	1	2	1	2	2	2	0	2	2	1	1	1	0	0	0
SE2473.semibin_refined.078	d__Bacteria	p__Proteobacteria	c__Alphaproteobacteria	o__Rhodobacterales	f__Rhodobacteraceae	g__Tateyamaria	s__	1	1	1	0	1	0	1	0	0	1	1	0	1	0	0	0	0	0	0	0	0	0	0	0	0	0	0	0	0	0	0	0	0	0	0	0	0	0	0	0	0	0
SE2473.semibin_refined.109_sub	d__Bacteria	p__Proteobacteria	c__Alphaproteobacteria	o__Sphingomonadales	f__Sphingomonadaceae	g__Erythrobacter	s__	1	1	1	1	1	1	1	0	0	1	1	1	1	0	0	0	0	0	0	0	0	0	0	0	0	0	0	0	0	0	0	0	0	0	0	0	0	0	0	0	0	0
SE2473.semibin_refined.128	d__Bacteria	p__Planctomycetota	c__Phycisphaerae	o__Phycisphaerales	f__Phycisphaeraceae	g__	s__	1	0	0	1	0	1	1	0	0	1	0	1	1	0	1	0	0	0	0	0	0	0	0	3	0	0	0	0	0	0	0	0	0	0	0	0	0	0	0	0	0	0
SE2473.semibin_refined.155	d__Bacteria	p__Proteobacteria	c__Alphaproteobacteria	o__Caulobacterales	f__Parvularculaceae	g__Parvularcula	s__	1	1	0	1	0	1	0	0	0	1	1	1	1	2	0	0	0	2	1	2	0	1	0	2	0	0	0	0	0	0	0	0	0	0	0	0	0	0	0	0	0	0
SE2473.semibin_refined.156	d__Bacteria	p__Proteobacteria	c__Alphaproteobacteria	o__Rhodobacterales	f__Rhodobacteraceae	g__Roseobacter	s__	1	1	1	1	1	1	1	0	0	1	1	1	1	1	1	1	1	0	1	1	1	0	0	1	0	0	0	0	0	0	0	0	0	0	0	0	0	0	0	0	0	0
SE2473.semibin_refined.164	d__Bacteria	p__Proteobacteria	c__Alphaproteobacteria	o__Caulobacterales	f__Maricaulaceae	g__Oceanicaulis	s__	2	1	1	1	1	1	1	0	0	1	1	1	1	2	1	1	1	1	2	2	4	1	0	2	0	0	0	0	0	0	0	0	0	0	0	0	0	0	0	0	0	0
SE2473.vamb.013	d__Bacteria	p__Planctomycetota	c__Planctomycetia	o__Pirellulales	f__Pirellulaceae	g__Stieleria	s__	4	0	0	1	0	1	1	1	0	1	1	1	1	2	0	0	1	0	0	0	0	0	0	3	0	0	0	0	0	0	0	0	0	0	0	0	0	0	0	0	0	0
SE2473.vamb.038	d__Bacteria	p__Verrucomicrobiota	c__Verrucomicrobiae	o__Opitutales	f__JABSRG01	g__JABSRG01	s__	1	0	0	1	0	1	1	1	0	1	1	1	1	1	0	0	0	0	0	0	1	0	0	1	0	0	0	0	0	0	0	0	0	0	0	0	0	0	0	0	0	0
SE2473.vamb.043	d__Bacteria	p__Proteobacteria	c__Alphaproteobacteria	o__Sphingomonadales	f__Sphingomonadaceae	g__Erythrobacter	s__	1	1	1	1	1	1	1	0	0	1	1	1	1	0	0	0	0	0	0	0	0	0	0	0	0	0	0	0	0	0	0	0	0	0	0	0	0	0	0	0	0	0
SE2478.vamb.011	d__Bacteria	p__Bacteroidota	c__Bacteroidia	o__Cytophagales	f__Amoebophilaceae	g__	s__	1	0	0	0	0	1	1	1	0	1	1	1	1	0	0	0	0	0	0	0	0	0	0	0	0	0	0	0	0	0	0	0	0	0	0	0	0	0	0	0	0	0
SE2479.concoct.053	d__Bacteria	p__Proteobacteria	c__Alphaproteobacteria	o__Rhizobiales	f__OSC116	g__	s__	1	1	1	1	1	1	1	0	0	1	1	1	1	0	0	0	0	0	0	0	0	0	0	0	0	0	0	0	0	0	0	0	0	0	0	0	0	0	0	0	0	0
SE2485.concoct.019	d__Bacteria	p__Proteobacteria	c__Gammaproteobacteria	o__Xanthomonadales	f__	g__	s__	0	1	0	1	1	0	0	0	0	0	1	0	0	1	0	0	0	2	1	0	0	2	2	2	0	0	0	0	0	0	0	0	0	0	0	0	0	0	0	0	0	0
SE2485.concoct.037	d__Bacteria	p__Proteobacteria	c__Gammaproteobacteria	o__SZUA-146	f__SZUA-146	g__	s__	1	0	0	0	1	0	1	0	0	0	1	1	1	0	0	0	1	1	1	0	1	0	0	2	0	0	0	0	0	0	0	0	0	0	0	0	0	0	0	0	0	0
SE2485.concoct.075	d__Bacteria	p__Proteobacteria	c__Gammaproteobacteria	o__Woeseiales	f__Woeseiaceae	g__UBA1847	s__	0	1	0	0	0	1	1	0	0	1	0	1	0	0	0	0	0	0	0	0	1	1	0	0	0	0	0	0	0	0	0	0	0	0	0	0	0	0	0	0	0	0
SE2485.concoct.102	d__Bacteria	p__Proteobacteria	c__Alphaproteobacteria	o__Rhizobiales	f__Methyloligellaceae	g__	s__	1	1	1	1	1	1	1	0	0	1	1	1	0	0	0	0	0	0	0	0	0	0	0	0	0	0	0	0	0	0	0	0	0	0	0	0	0	0	0	0	0	0
SE2485.concoct.109_sub	d__Bacteria	p__Planctomycetota	c__Phycisphaerae	o__Phycisphaerales	f__UBA1924	g__	s__	0	0	0	0	0	0	0	0	0	0	0	0	0	0	0	0	0	0	0	0	0	0	0	0	0	0	0	0	0	0	0	0	0	0	0	0	0	0	0	0	0	0
SE2485.concoct.116	d__Bacteria	p__Proteobacteria	c__Alphaproteobacteria	o__Rhizobiales	f__Rhizobiaceae	g__Lentilitoribacter	s__	1	1	0	2	0	1	1	1	0	0	1	1	1	0	0	0	0	0	0	0	0	0	0	0	0	0	0	0	0	0	0	0	0	0	0	0	0	0	0	0	0	0
SE2485.concoct.117_sub	d__Bacteria	p__Proteobacteria	c__Alphaproteobacteria	o__Rhodobacterales	f__Rhodobacteraceae	g__Ruegeria	s__	0	1	1	1	1	0	0	0	0	1	2	1	0	0	0	0	0	0	0	0	0	0	0	0	0	0	0	0	0	0	0	0	0	0	0	0	0	0	0	0	0	0
SE2485.concoct.120	d__Bacteria	p__Proteobacteria	c__Alphaproteobacteria	o__Rhodobacterales	f__Rhodobacteraceae	g__JABDJO01	s__	1	1	1	1	1	1	1	0	0	1	1	1	1	0	0	0	0	0	0	0	0	0	0	0	0	0	0	0	0	0	0	0	0	0	0	0	0	0	0	0	0	0
SE2485.concoct.128_sub	d__Bacteria	p__Proteobacteria	c__Alphaproteobacteria	o__Rhodobacterales	f__Rhodobacteraceae	g__JABSSC01	s__	2	0	0	1	0	0	0	0	0	1	0	0	0	1	0	1	1	0	0	0	1	0	0	0	0	0	0	0	0	0	0	0	0	0	0	0	0	0	0	0	0	0
SE2485.concoct.131_sub	d__Bacteria	p__Bacteroidota	c__Bacteroidia	o__Flavobacteriales	f__Flavobacteriaceae	g__Winogradskyella	s__	1	0	0	0	0	1	0	1	0	0	1	1	1	0	0	0	0	0	0	0	0	0	0	0	0	0	0	0	0	0	0	0	0	0	0	0	0	0	0	0	0	0
SE2485.concoct.140	d__Bacteria	p__Planctomycetota	c__PLA2	o__PLA2	f__JAEUHO01	g__	s__	1	0	0	1	0	1	1	0	0	0	0	1	1	1	0	0	0	0	0	0	1	0	0	0	0	0	0	0	0	0	0	0	0	0	0	0	0	0	0	0	0	0
SE2485.concoct.144	d__Bacteria	p__Proteobacteria	c__Alphaproteobacteria	o__Rhizobiales	f__OSC116	g__	s__	1	1	1	0	1	1	1	0	0	1	1	1	1	0	0	0	0	0	0	0	0	0	0	0	0	0	0	0	0	0	0	0	0	0	0	0	0	0	0	0	0	0
SE2485.concoct.162	d__Bacteria	p__Proteobacteria	c__Gammaproteobacteria	o__Woeseiales	f__Woeseiaceae	g__JAACFE01	s__	1	1	1	1	1	1	1	0	0	1	1	1	1	1	1	1	1	1	1	1	1	1	1	1	0	0	0	0	0	0	0	0	0	0	0	0	0	0	0	0	0	0
SE2485.concoct.173_sub	d__Bacteria	p__Proteobacteria	c__Alphaproteobacteria	o__Rhodobacterales	f__Rhodobacteraceae	g__Rhodobacter_B	s__	1	1	0	1	0	0	1	0	0	1	1	1	1	2	0	1	2	1	1	1	1	0	0	1	0	0	0	0	0	0	0	0	0	0	0	0	0	0	0	0	0	0
SE2485.concoct.194	d__Bacteria	p__Proteobacteria	c__Alphaproteobacteria	o__Rhizobiales	f__	g__	s__	0	1	0	1	1	1	0	0	0	1	1	1	0	0	0	0	0	0	0	0	0	0	0	0	0	0	0	0	0	0	0	0	0	0	0	0	0	0	0	0	0	0
SE2485.maxbin.012	d__Bacteria	p__Planctomycetota	c__Planctomycetia	o__Pirellulales	f__Pirellulaceae	g__Mariniblastus	s__	4	0	0	1	0	1	1	1	0	1	1	1	1	1	0	0	0	0	1	0	0	1	0	2	0	0	0	0	0	0	0	0	0	0	0	0	0	0	0	0	0	0
SE2485.maxbin.050_sub	d__Bacteria	p__Proteobacteria	c__Alphaproteobacteria	o__Sphingomonadales	f__Sphingomonadaceae	g__Erythrobacter	s__	1	1	1	1	1	1	1	0	0	0	0	0	1	0	0	0	0	0	0	0	0	0	0	0	0	0	0	0	0	0	0	0	0	0	0	0	0	0	0	0	0	0
SE2485.maxbin.065_sub	d__Bacteria	p__Bacteroidota	c__Bacteroidia	o__Flavobacteriales	f__Flavobacteriaceae	g__Croceivirga	s__	0	0	0	0	0	1	1	1	0	0	1	0	0	0	0	0	0	0	0	0	0	0	0	0	0	0	0	0	0	0	0	0	0	0	0	0	0	0	0	0	0	0
SE2485.metabat2_refined.011_sub	d__Bacteria	p__Proteobacteria	c__Alphaproteobacteria	o__Rhodobacterales	f__Rhodobacteraceae	g__Thalassobius	s__	1	1	1	1	1	1	0	0	0	1	0	1	1	0	0	0	0	0	0	0	0	0	0	0	0	0	0	0	0	0	0	0	0	0	0	0	0	0	0	0	0	0
SE2485.metabat2_refined.030_sub	d__Bacteria	p__Proteobacteria	c__Gammaproteobacteria	o__UBA4575	f__UBA4575	g__JABDMD01	s__	1	1	1	0	0	1	1	0	0	1	1	1	1	1	1	1	1	0	0	1	1	0	0	0	0	0	0	0	0	0	0	0	0	0	0	0	0	0	0	0	0	0
SE2485.metabat2_refined.112_sub	d__Bacteria	p__Proteobacteria	c__Alphaproteobacteria	o__Rhizobiales	f__MH13	g__MH13	s__	0	1	0	1	0	1	0	0	0	1	0	1	0	0	0	0	0	0	0	0	0	0	0	0	0	0	0	0	0	0	0	0	0	0	0	0	0	0	0	0	0	0
SE2485.metabat2_refined.127	d__Bacteria	p__Actinobacteriota	c__Acidimicrobiia	o__Acidimicrobiales	f__TK06	g__JAADHX01	s__	1	0	1	1	1	1	1	0	0	1	1	1	1	0	0	0	0	0	0	0	0	0	0	0	0	0	0	0	0	0	0	0	0	0	0	0	0	0	0	0	0	0
SE2485.metabat2_refined.156_sub	d__Bacteria	p__Bacteroidota	c__Bacteroidia	o__Flavobacteriales	f__Flavobacteriaceae	g__Muricauda	s__	1	0	0	1	0	1	1	1	0	1	1	1	1	0	0	0	0	0	0	0	0	0	0	0	0	0	0	0	0	0	0	0	0	0	0	0	0	0	0	0	0	0
SE2485.metabat_spec.003	d__Bacteria	p__Bacteroidota	c__Bacteroidia	o__Flavobacteriales	f__Flavobacteriaceae	g__Muricauda	s__	1	0	0	1	0	1	1	1	0	1	1	1	1	0	0	0	0	0	0	0	0	0	0	0	0	0	0	0	0	0	0	0	0	0	0	0	0	0	0	0	0	0
SE2485.rosella_refine.7_0	d__Bacteria	p__Proteobacteria	c__Alphaproteobacteria	o__Rhodobacterales	f__Rhodobacteraceae	g__HKCCE3408	s__	1	0	0	0	0	0	1	0	0	0	0	0	1	0	0	0	0	0	0	0	0	0	0	0	0	0	0	0	0	0	0	0	0	0	0	0	0	0	0	0	0	0
SE2485.semibin_refined.004	d__Bacteria	p__Proteobacteria	c__Alphaproteobacteria	o__Micavibrionales	f__Micavibrionaceae	g__UBA1850	s__	0	1	0	1	0	1	1	0	0	0	1	1	1	0	0	0	0	0	0	0	0	0	0	0	0	0	0	0	0	0	0	0	0	0	0	0	0	0	0	0	0	0
SE2485.semibin_refined.008_sub	d__Bacteria	p__Proteobacteria	c__Alphaproteobacteria	o__Caulobacterales	f__Maricaulaceae	g__Hyphobacterium	s__	1	1	1	1	1	1	1	0	0	1	1	1	1	3	2	1	1	2	1	2	3	2	1	3	0	0	0	0	0	0	0	0	0	0	0	0	0	0	0	0	0	0
SE2485.semibin_refined.010_sub	d__Bacteria	p__Proteobacteria	c__Alphaproteobacteria	o__Sphingomonadales	f__Sphingomonadaceae	g__Erythrobacter	s__	1	1	1	1	0	0	1	0	0	1	1	0	0	0	0	0	0	0	0	0	0	0	0	0	0	0	0	0	0	0	0	0	0	0	0	0	0	0	0	0	0	0
SE2485.semibin_refined.078	d__Bacteria	p__Proteobacteria	c__Alphaproteobacteria	o__Micavibrionales	f__Micavibrionaceae	g__	s__	1	1	1	1	1	1	1	0	0	1	1	1	1	0	0	0	0	0	0	0	0	0	0	0	0	0	0	0	0	0	0	0	0	0	0	0	0	0	0	0	0	0
SE2485.semibin_refined.088_sub	d__Bacteria	p__Proteobacteria	c__Gammaproteobacteria	o__Arenicellales	f__Arenicellaceae	g__Arenicella	s__	1	1	1	0	1	1	2	0	0	1	1	1	1	1	1	1	1	0	1	1	2	1	1	1	0	0	0	0	0	0	0	0	0	0	0	0	0	0	0	0	0	0
SE2485.semibin_refined.093_sub	d__Bacteria	p__Proteobacteria	c__Alphaproteobacteria	o__Bin98	f__	g__	s__	2	1	1	0	0	1	0	0	0	1	1	1	1	0	0	0	0	0	0	0	0	0	0	0	0	0	1	1	0	0	0	0	0	0	0	0	0	0	0	0	0	0
SE2490.concoct.103_sub	d__Bacteria	p__Chloroflexota	c__Anaerolineae	o__Promineofilales	f__Promineofilaceae	g__WTJY01	s__	1	0	0	0	0	0	1	0	0	0	0	1	0	0	0	0	0	0	0	0	0	0	0	0	0	0	0	0	0	0	0	0	0	0	0	0	0	0	0	0	0	0
SE2490.maxbin.044	d__Bacteria	p__Proteobacteria	c__Alphaproteobacteria	o__Sphingomonadales	f__Sphingomonadaceae	g__Parasphingopyxis	s__	1	1	1	1	1	1	1	0	0	1	1	1	1	1	1	1	2	1	1	1	1	1	1	1	0	0	0	0	0	0	0	0	0	0	0	0	0	0	0	0	0	0
SE2490.metabat2_refined.034_sub	d__Bacteria	p__Proteobacteria	c__Alphaproteobacteria	o__Rhodobacterales	f__Rhodobacteraceae	g__Tateyamaria	s__	1	0	0	0	0	0	0	0	0	0	0	0	0	1	1	2	1	0	1	1	2	0	0	2	0	0	0	0	0	0	0	0	0	0	0	0	0	0	0	0	0	0
SE2490.metabat2_refined.036	d__Bacteria	p__Bacteroidota	c__Bacteroidia	o__Flavobacteriales	f__Flavobacteriaceae	g__Kordia	s__	1	0	0	1	0	1	1	1	0	1	1	1	1	0	0	0	0	0	0	0	0	0	0	0	0	0	0	0	0	0	0	0	0	0	0	0	0	0	0	0	0	0
SE2490.rosella_refined.052	d__Bacteria	p__Proteobacteria	c__Gammaproteobacteria	o__JABCZS01	f__JABCZS01	g__	s__	1	1	1	1	1	1	1	0	0	1	1	1	1	1	1	1	1	0	1	1	1	1	0	1	0	0	0	0	0	0	0	0	0	0	0	0	0	0	0	0	0	0
SE2490.rosella_refined.063	d__Bacteria	p__Acidobacteriota	c__Thermoanaerobaculia	o__UBA5704	f__UBA5704	g__	s__	2	0	1	1	1	1	2	0	0	1	1	1	1	0	0	0	0	0	0	0	1	1	0	1	0	0	0	0	0	0	0	0	0	0	0	0	0	0	0	0	0	0
SE2490.semibin_refined.059_sub	d__Bacteria	p__Proteobacteria	c__Alphaproteobacteria	o__Rhodobacterales	f__Rhodobacteraceae	g__Yoonia	s__	1	2	1	1	0	0	1	0	0	1	0	0	1	0	0	0	0	0	0	0	0	0	0	0	0	0	1	0	1	0	0	0	0	0	0	0	0	0	0	0	0	0
SE2490.vamb.031	d__Bacteria	p__Bacteroidota	c__Bacteroidia	o__Cytophagales	f__	g__	s__	1	0	0	0	0	1	1	1	0	0	0	1	1	0	0	0	0	0	0	0	0	0	0	0	0	0	0	0	0	0	0	0	0	0	0	0	0	0	0	0	0	0
SE2496.rosella_refined.004	d__Bacteria	p__Proteobacteria	c__Alphaproteobacteria	o__Caulobacterales	f__Hyphomonadaceae	g__Henriciella	s__	1	1	1	1	1	1	1	0	0	1	1	1	1	1	1	1	1	1	1	1	2	0	1	2	0	0	1	0	0	1	0	0	0	0	0	0	0	0	0	0	0	0
SE2498.concoct.028	d__Bacteria	p__Proteobacteria	c__Alphaproteobacteria	o__Rhodobacterales	f__Rhodobacteraceae	g__JABSSC01	s__	1	1	1	1	1	1	1	0	0	1	1	1	1	1	0	0	0	0	0	1	2	0	0	2	0	0	0	0	0	0	0	0	0	0	0	0	0	0	0	0	0	0
SE2498.concoct.040_sub	d__Bacteria	p__Patescibacteria	c__Paceibacteria	o__UBA9983_A	f__UBA918	g__OLB19	s__	0	0	0	0	0	0	0	0	0	0	1	0	0	0	0	0	0	0	0	0	0	0	0	4	0	0	0	0	0	0	0	0	0	0	0	0	0	0	0	0	0	0
SE2498.concoct.042	d__Bacteria	p__Proteobacteria	c__Alphaproteobacteria	o__Sphingomonadales	f__	g__	s__	1	1	1	1	1	1	1	0	0	1	1	1	1	1	1	1	1	1	1	1	1	1	0	1	0	0	0	0	0	0	0	0	0	0	0	0	0	0	0	0	0	0
SE2498.concoct.091	d__Bacteria	p__Proteobacteria	c__Alphaproteobacteria	o__Rhizobiales	f__Aestuariivirgaceae	g__Anderseniella	s__	1	1	1	0	1	1	1	0	0	1	0	0	1	0	0	0	0	0	0	0	0	0	0	0	0	0	0	0	0	0	0	0	0	0	0	0	0	0	0	0	0	0
SE2498.metabat2_refined.032	d__Bacteria	p__Proteobacteria	c__Alphaproteobacteria	o__Rhodobacterales	f__Rhodobacteraceae	g__JABSSC01	s__	1	1	1	1	1	1	1	0	0	1	1	1	0	0	0	0	0	0	0	0	0	0	0	0	0	0	0	0	0	0	0	0	0	0	0	0	0	0	0	0	0	0
SE2498.metabat_spec.005_sub	d__Bacteria	p__Proteobacteria	c__Alphaproteobacteria	o__Rhodobacterales	f__Rhodobacteraceae	g__IMCC34051	s__	0	0	1	1	1	0	1	0	0	1	1	1	1	0	0	0	0	0	0	0	0	0	0	0	0	0	0	0	0	0	0	0	0	0	0	0	0	0	0	0	0	0
SE2498.rosella_refined.038_sub	d__Bacteria	p__Verrucomicrobiota	c__Verrucomicrobiae	o__Opitutales	f__JABSRG01	g__	s__	1	1	0	1	0	1	1	1	0	1	1	1	1	1	0	0	1	0	0	0	2	0	0	2	0	0	0	0	0	0	0	0	0	0	0	0	0	0	0	0	0	0
SE2498.rosella_refined.044	d__Bacteria	p__Proteobacteria	c__Gammaproteobacteria	o__Pseudomonadales	f__Cellvibrionaceae	g__	s__	1	1	1	1	1	1	1	0	0	1	1	1	1	1	1	1	1	1	1	1	1	2	1	1	0	0	0	0	0	0	0	0	0	0	0	0	0	0	0	0	0	0
SE2498.vamb.005	d__Bacteria	p__Proteobacteria	c__Alphaproteobacteria	o__Geminicoccales	f__Geminicoccaceae	g__	s__	1	1	1	1	1	1	1	0	0	1	1	1	1	1	0	1	0	0	0	0	1	0	0	1	0	0	0	0	0	0	0	0	0	0	0	0	0	0	0	0	0	0
SE2506.concoct.067	d__Bacteria	p__Proteobacteria	c__Alphaproteobacteria	o__Rhodobacterales	f__Rhodobacteraceae	g__JABDJO01	s__	2	1	1	1	1	1	1	0	0	1	1	0	1	1	0	1	0	0	0	0	1	0	0	1	0	0	0	0	0	0	0	0	0	0	0	0	0	0	0	0	0	0
SE2506.maxbin.040	d__Bacteria	p__Acidobacteriota	c__Holophagae	o__Acanthopleuribacterales	f__Acanthopleuribacteraceae	g__	s__	1	0	0	0	0	1	1	0	0	1	1	1	1	1	1	0	0	0	1	0	1	0	0	2	0	0	0	0	0	0	0	0	0	0	0	0	0	0	0	0	0	0
SE2506.metabat2_refined.022_sub	d__Bacteria	p__Proteobacteria	c__Alphaproteobacteria	o__Sphingomonadales	f__	g__	s__	0	0	1	1	0	1	0	0	0	1	1	1	0	1	0	1	1	0	0	0	1	0	0	0	0	0	0	0	0	0	0	0	0	0	0	0	0	0	0	0	0	0
SE2506.metabat_sens.012	d__Bacteria	p__Proteobacteria	c__Alphaproteobacteria	o__Rhodobacterales	f__Rhodobacteraceae	g__Roseicyclus	s__	1	1	1	1	1	1	1	0	0	1	1	1	1	0	0	0	0	0	0	0	0	0	0	0	0	0	0	0	0	0	0	0	0	0	0	0	0	0	0	0	0	0
SE2506.metabat_sens.014	d__Bacteria	p__Proteobacteria	c__Alphaproteobacteria	o__Rhodobacterales	f__Rhodobacteraceae	g__IMCC34051	s__	1	1	1	1	1	1	1	0	0	1	1	0	1	0	0	0	0	0	0	0	0	0	0	0	0	0	0	0	0	0	0	0	0	0	0	0	0	0	0	0	0	0
SE2506.rosella_refined.038	d__Bacteria	p__Proteobacteria	c__Alphaproteobacteria	o__Caulobacterales	f__Hyphomonadaceae	g__	s__	1	1	1	1	1	1	1	0	0	1	1	1	1	1	1	1	1	1	1	1	2	1	0	2	0	0	0	0	0	0	0	0	0	0	0	0	0	0	0	0	0	0
SE2506.rosella_refined.049	d__Bacteria	p__Acidobacteriota	c__Thermoanaerobaculia	o__UBA5704	f__UBA5704	g__	s__	2	0	1	1	1	1	1	0	0	1	1	0	1	0	0	0	0	0	0	0	1	0	0	2	0	0	0	0	0	0	0	0	0	0	0	0	0	0	0	0	0	0
SE2506.semibin_refined.008	d__Bacteria	p__Planctomycetota	c__Planctomycetia	o__Pirellulales	f__Lacipirellulaceae	g__	s__	1	0	0	0	0	1	1	1	0	1	1	1	0	1	0	0	0	0	1	0	1	0	0	2	0	0	0	0	0	0	0	0	0	0	0	0	0	0	0	0	0	0
SE2506.semibin_refined.066	d__Bacteria	p__Proteobacteria	c__Alphaproteobacteria	o__Rhizobiales	f__MH13	g__MH13	s__	1	1	1	1	1	1	1	0	0	1	1	1	1	0	0	0	0	0	0	0	0	0	0	0	0	0	0	0	0	0	0	0	0	0	0	0	0	0	0	0	0	0
SE2506.vamb.002	d__Bacteria	p__Proteobacteria	c__Gammaproteobacteria	o__Pseudomonadales	f__GM7GCV1	g__GM7GCV1	s__	1	1	1	1	1	1	1	0	0	1	1	1	1	2	1	0	1	0	1	1	2	2	0	2	0	0	0	0	0	0	0	0	0	0	0	0	0	0	0	0	0	0
SE2507.concoct.019	d__Bacteria	p__Proteobacteria	c__Alphaproteobacteria	o__Rhodobacterales	f__Rhodobacteraceae	g__JABSSC01	s__	1	1	1	1	1	1	1	0	0	1	1	0	1	2	1	1	1	0	1	0	2	0	0	2	0	0	0	0	0	0	0	0	0	0	0	0	0	0	0	0	0	0
SE2507.concoct.026	d__Bacteria	p__Proteobacteria	c__Gammaproteobacteria	o__Enterobacterales	f__Shewanellaceae	g__Ferrimonas	s__	1	1	1	1	1	1	1	0	0	1	1	1	0	1	1	1	1	1	1	2	1	1	0	1	0	0	0	0	0	0	0	0	0	0	0	0	0	0	0	0	0	0
SE2507.metabat2_refined.016_sub	d__Bacteria	p__Proteobacteria	c__Gammaproteobacteria	o__Pseudomonadales	f__Cellvibrionaceae	g__Agarilytica	s__	0	0	0	0	0	0	0	0	0	0	0	0	0	1	0	0	0	1	1	1	1	1	1	1	0	0	0	1	1	0	0	1	1	0	1	0	0	0	0	0	0	0
SE2507.semibin_refined.008	d__Bacteria	p__Bacteroidota	c__Bacteroidia	o__Chitinophagales	f__Saprospiraceae	g__	s__	1	0	0	0	0	1	1	1	0	1	1	1	1	0	0	0	0	0	0	0	0	0	0	0	0	0	0	0	0	0	0	0	0	0	0	0	0	0	0	0	0	0
SE2510.maxbin.024_sub	d__Bacteria	p__Proteobacteria	c__Alphaproteobacteria	o__Rhizobiales	f__OSC116	g__	s__	1	1	1	1	1	1	1	0	0	1	1	1	1	0	0	0	0	0	0	0	0	0	0	0	0	0	0	0	0	0	0	0	0	0	0	0	0	0	0	0	0	0
SE2510.rosella_refined.035	d__Bacteria	p__Acidobacteriota	c__Thermoanaerobaculia	o__UBA5704	f__UBA5704	g__	s__	2	0	1	1	1	1	1	0	0	1	1	1	1	0	0	0	0	0	0	0	1	1	0	3	0	0	0	0	0	0	0	0	0	0	0	0	0	0	0	0	0	0
SE2510.semibin_refined.033	d__Bacteria	p__Proteobacteria	c__Alphaproteobacteria	o__Rhizobiales	f__OSC116	g__	s__	1	1	1	1	1	1	1	0	0	1	1	1	1	0	0	0	0	0	0	0	0	0	0	0	0	0	0	0	0	0	0	0	0	0	0	0	0	0	0	0	0	0
SE2517.concoct.031_sub	d__Bacteria	p__Proteobacteria	c__Alphaproteobacteria	o__Rhodobacterales	f__Rhodobacteraceae	g__JABDJO01	s__	2	0	0	0	0	0	0	0	0	0	0	0	0	0	0	0	0	0	0	0	0	0	0	0	0	0	0	0	0	0	0	0	0	0	0	0	0	0	0	0	0	0
SE2517.concoct.052_sub	d__Bacteria	p__Desulfobacterota_D	c__UBA1144	o__RKRQ01	f__	g__	s__	1	0	0	0	0	0	0	0	0	0	0	0	0	0	0	0	0	0	0	0	1	0	0	0	0	0	0	0	0	0	0	0	0	0	0	0	0	0	0	0	0	0
SE2517.metabat2_refined.017_sub	d__Bacteria	p__Planctomycetota	c__PLA2	o__PLA2	f__JAEUHO01	g__	s__	1	0	0	0	0	0	1	0	0	0	0	0	0	1	0	0	0	0	0	0	0	0	0	1	0	0	0	0	0	0	0	0	0	0	0	0	0	0	0	0	0	0
SE2517.metabat2_refined.020_sub	d__Bacteria	p__Myxococcota	c__Polyangia	o__Polyangiales	f__Polyangiaceae	g__	s__	0	0	0	1	0	1	1	0	0	1	1	0	1	1	1	1	0	0	1	1	0	0	0	0	0	0	0	0	0	0	0	0	0	0	0	0	0	0	0	0	0	0
SE2517.metabat2_refined.041	d__Bacteria	p__Proteobacteria	c__Alphaproteobacteria	o__Rhizobiales	f__HXMU1428-3	g__HXMU1428-3	s__	2	1	1	0	1	0	1	0	0	0	1	1	0	0	0	0	0	0	0	0	0	0	0	0	0	0	0	0	0	0	0	0	0	0	0	0	0	0	0	0	0	0
SE2522.concoct.073_sub	d__Bacteria	p__Proteobacteria	c__Gammaproteobacteria	o__Xanthomonadales	f__SZUA-36	g__W260	s__	0	1	0	0	0	0	0	0	0	0	0	0	1	0	0	1	0	0	0	0	1	0	0	0	0	0	0	0	0	0	0	0	0	0	0	0	0	0	0	0	0	0
SE2522.metabat2_refined.001	d__Bacteria	p__Proteobacteria	c__Alphaproteobacteria	o__Rhizobiales	f__HXMU1428-3	g__HXMU1428-3	s__	1	1	1	1	0	1	1	0	0	1	1	1	1	0	0	0	0	0	0	0	0	0	0	0	0	0	0	0	0	0	0	0	0	0	0	0	0	0	0	0	0	0
SE2522.metabat2_refined.041_sub	d__Bacteria	p__Proteobacteria	c__Gammaproteobacteria	o__Pseudomonadales	f__Halieaceae	g__Halioglobus	s__	1	0	1	1	0	1	1	0	0	0	1	1	1	2	1	1	1	1	2	2	1	0	0	2	0	0	0	0	0	0	0	0	0	0	0	0	0	0	0	0	0	0
SE2522.metabat_spec.004	d__Bacteria	p__Proteobacteria	c__Alphaproteobacteria	o__Rhodobacterales	f__Rhodobacteraceae	g__Thalassococcus	s__Thalassococcus halodurans	1	1	1	1	1	1	1	0	0	1	1	1	1	0	0	0	0	0	0	0	0	0	0	0	0	0	0	0	0	0	0	0	0	0	0	0	0	0	0	0	0	0
SE2534.metabat2_refined.005	d__Bacteria	p__Proteobacteria	c__Alphaproteobacteria	o__Rhodobacterales	f__Rhodobacteraceae	g__Salipiger	s__	2	1	1	1	1	1	1	0	0	1	1	1	1	1	0	0	0	1	0	1	1	0	0	1	0	0	0	0	0	0	0	0	0	0	0	0	0	0	0	0	0	0
SE2534.rosella_refined.021	d__Bacteria	p__Proteobacteria	c__Alphaproteobacteria	o__Rhizobiales	f__Rhizobiaceae	g__JAALLB01	s__	1	1	0	1	0	1	1	1	0	1	1	1	1	0	0	0	0	0	0	0	0	0	0	0	0	0	0	0	0	0	0	0	0	0	0	0	0	0	0	0	0	0
SE2536.vamb.004	d__Bacteria	p__Proteobacteria	c__Alphaproteobacteria	o__Rhizobiales	f__JACESI01	g__JACESI01	s__	1	1	0	1	0	1	1	1	0	1	1	1	1	0	0	0	0	0	0	0	1	0	0	0	0	0	1	1	1	1	1	1	0	0	1	1	0	1	1	0	0	0
SE2537.metabat2_refined.030	d__Bacteria	p__Acidobacteriota	c__Thermoanaerobaculia	o__UBA5704	f__UBA5704	g__	s__	1	0	1	1	1	1	1	0	0	1	1	1	1	0	0	0	0	0	0	0	0	1	0	0	0	0	0	0	0	0	0	0	0	0	0	0	0	0	0	0	0	0
SE2540.concoct.038	d__Bacteria	p__Bacteroidota	c__Bacteroidia	o__Flavobacteriales	f__Flavobacteriaceae	g__Muricauda	s__	1	0	0	0	0	1	1	1	0	1	1	1	1	0	0	0	0	0	0	0	0	0	0	0	0	0	0	0	0	0	0	0	0	0	0	0	0	0	0	0	0	0
SE2540.concoct.042_sub	d__Bacteria	p__Proteobacteria	c__Gammaproteobacteria	o__UBA12402	f__UBA12402	g__1-14-0-20-46-22	s__	0	0	0	1	0	0	0	0	0	0	1	0	1	0	0	0	0	0	0	0	0	0	0	0	0	0	0	0	0	0	0	0	0	0	0	0	0	0	0	0	0	0
SE2540.concoct.145_sub	d__Bacteria	p__Proteobacteria	c__Alphaproteobacteria	o__Rhodobacterales	f__Rhodobacteraceae	g__Roseobacter	s__	1	1	0	0	1	1	1	0	0	0	1	1	1	0	0	0	0	0	0	0	0	0	0	0	0	0	0	0	0	0	0	0	0	0	0	0	0	0	0	0	0	0
SE2540.concoct.148	d__Bacteria	p__Bacteroidota	c__Bacteroidia	o__Flavobacteriales	f__Flavobacteriaceae	g__Muricauda_A	s__	1	0	0	1	0	1	0	0	0	0	0	1	0	0	0	0	0	0	0	0	0	0	0	0	0	0	0	0	0	0	0	0	0	0	0	0	0	0	0	0	0	0
SE2540.concoct.167	d__Bacteria	p__Proteobacteria	c__Gammaproteobacteria	o__Pseudomonadales	f__GM7GCV1	g__GM7GCV1	s__	1	1	1	1	1	1	1	0	0	1	1	1	1	2	2	1	2	1	2	2	2	3	0	2	0	0	0	0	0	0	0	0	0	0	0	0	0	0	0	0	0	0
SE2540.metabat2_refined.034	d__Bacteria	p__Proteobacteria	c__Gammaproteobacteria	o__Pseudomonadales	f__Cellvibrionaceae	g__	s__	1	1	1	1	1	1	1	0	0	1	1	1	1	1	1	1	1	1	1	1	1	2	1	2	0	0	1	1	0	1	1	1	0	0	1	0	1	0	0	0	0	0
SE2540.metabat2_refined.099	d__Bacteria	p__Planctomycetota	c__Phycisphaerae	o__Phycisphaerales	f__UBA1924	g__	s__	0	0	0	1	0	1	0	0	0	1	0	1	0	0	0	0	0	0	0	0	0	0	0	1	0	0	0	0	0	0	0	0	0	0	0	0	0	0	0	0	0	0
SE2540.metabat2_refined.118_sub	d__Bacteria	p__Proteobacteria	c__Alphaproteobacteria	o__Rhodobacterales	f__Rhodobacteraceae	g__Roseobacter	s__	0	1	0	0	0	0	1	0	0	0	0	0	0	0	0	0	0	0	0	0	0	0	0	0	0	0	0	0	0	0	0	0	0	0	0	0	0	0	0	0	0	0
SE2540.metabat_sspec.013_sub	d__Bacteria	p__Proteobacteria	c__Alphaproteobacteria	o__Rhizobiales	f__Tepidamorphaceae	g__	s__	1	1	1	0	1	1	1	0	0	0	1	1	1	0	0	0	0	0	0	0	0	0	0	0	0	0	1	0	0	1	0	0	0	0	0	1	0	0	0	0	0	0
SE2540.rosella_refine.275_0	d__Bacteria	p__Proteobacteria	c__Alphaproteobacteria	o__Rhizobiales	f__Rhodobiaceae	g__	s__	1	1	1	1	1	1	0	0	0	1	1	1	1	0	0	0	0	0	0	0	0	0	0	0	0	0	0	0	0	0	0	0	0	0	0	0	0	0	0	0	0	0
SE2540.rosella_refined.030_sub	d__Bacteria	p__Proteobacteria	c__Alphaproteobacteria	o__Kiloniellales	f__Kiloniellaceae	g__Denitrobaculum	s__	1	1	1	0	1	0	1	0	0	1	1	0	0	0	0	0	0	0	0	0	0	0	0	0	0	0	0	0	0	0	0	0	0	0	0	0	0	0	0	0	0	0
SE2540.rosella_refined.111	d__Bacteria	p__Bacteroidota	c__Bacteroidia	o__Flavobacteriales	f__Flavobacteriaceae	g__	s__	1	0	0	0	0	1	1	1	0	1	1	1	1	0	0	0	0	0	0	0	0	0	0	0	0	0	0	0	0	0	0	0	0	0	0	0	0	0	0	0	0	0
SE2540.rosella_refined.149	d__Bacteria	p__Proteobacteria	c__Alphaproteobacteria	o__Caulobacterales	f__Parvularculaceae	g__Parvularcula	s__	1	1	1	1	1	1	1	0	0	1	1	1	1	2	1	1	1	1	1	2	2	2	0	2	0	0	0	0	0	0	0	0	0	0	0	0	0	0	0	0	0	0
SE2540.semibin_refined.022	d__Bacteria	p__Proteobacteria	c__Alphaproteobacteria	o__Rhizobiales	f__Rhizobiaceae	g__JAALLB01	s__	1	1	0	1	0	1	1	1	0	1	1	1	1	0	0	0	0	0	0	0	0	0	0	0	0	0	0	0	0	0	0	0	0	0	0	0	0	0	0	0	0	0
SE2540.semibin_refined.035	d__Bacteria	p__Planctomycetota	c__Planctomycetia	o__Pirellulales	f__Pirellulaceae	g__Rubripirellula	s__	3	0	0	1	0	1	1	1	0	1	1	1	1	2	2	0	0	0	1	0	0	0	0	3	0	0	0	0	0	0	0	0	0	0	0	0	0	0	0	0	0	0
[truncated: 449 more rows]
[truncated: 171 more columns]

## Sheet: S7
KEGG ID	Gene name	Pathway	Model	Model test	coef	stderr	pval	FDR
[truncated: 1,010 more rows]
